# Supplementary material
Source: Research Square preprint supplement (doi:10.21203/rs.3.rs-8536759/v1)
Supplement: Supplementary file 1 [file 3bee212330dfef00aedf4a81.pdf]

# Supplementary Information

## **Carbocation-Guided Regioselective Deoxygenation of Unsymmetrical Diols via $B(C_6F_5)_3$ Catalysis with Silane Economy**

Sojeong Bang,<sup>1</sup> Jooye Lee,<sup>1,2</sup> Daseop Jo,<sup>1,2</sup> Yewon Kim,<sup>1</sup> and Jeonghyo Lee<sup>1\*</sup>

<sup>1</sup>Department of Chemistry and Research Institute for Convergence of Basic Science, Hanyang University, Seoul 04763, Republic of Korea.

<sup>2</sup>These authors contributed equally to this work.

## Table of Contents

|                                                                               |      |
|-------------------------------------------------------------------------------|------|
| 1. General Experimental Details .....                                         | S3   |
| 2. Procedures for the Preparation of Starting Materials.....                  | S4   |
| 3. Procedures for the Optimization Study .....                                | S14  |
| 4. Procedures for the BCF-catalyzed regioselective deoxygenation of diol..... | S20  |
| 5. Procedures for the deoxygenative deuteration .....                         | S28  |
| 6. Racemization study.....                                                    | S32  |
| 7. Hammett analysis .....                                                     | S34  |
| 8. Crystallography Information .....                                          | S36  |
| 9. Computational Data .....                                                   | S37  |
| 10. Spectral copies of $^1\text{H}$ and $^{13}\text{C}$ NMR .....             | S52  |
| 11. References .....                                                          | S119 |

## 1. General Experimental Details

**General Experimental Procedures:** Inside an argon-filled glovebox, diols (0.1 mmol, 1.0 equiv.) and  $B(C_6F_5)_3$  (2.56 mg, 5 mol %) were dissolved in  $CH_2Cl_2$  (0.5 ml) in a 4-ml screw-cap vial equipped with a magnetic stir bar. The silane was added dropwise to the solution, the vial was then closed and the reaction mixture was stirred for 8 hours before it was quenched with TBAF solution (150  $\mu$ l, 0.15 mmol, 1.5 equiv.). The yield of the corresponding products and remaining starting materials was determined by  $^1H$ -NMR analysis of the crude-reaction mixture using  $CH_2Br_2$  as the analytical standard. Flash column chromatography was performed using a Teledyne ISCO CombiFlash NextGen 300+ automated flash chromatography system equipped with RediSep Bronze normal-phase silica cartridges (4 g, 40–60  $\mu$ m, 230–400 mesh, 55–60 Å pore size), using hexane/ethyl acetate (95:5 v/v) as the eluent.

**Materials:** Unless otherwise noted, all reagents and starting materials were purchased from commercial suppliers (e.g., Sigma-Aldrich, TCI, Alfa Aesar) and used as received without further purification.  $B(C_6F_5)_3$  and silane reagents ( $Ph_2SiH_2$ ,  $PhSiH_3$ ,  $Ph_2SiD_2$ ) were obtained from commercial sources and used as received. Most diol substrates were prepared according to reported procedures (see the section 2 of the Supplementary Information), while some were purchased from commercial suppliers. All solvents, including anhydrous dichloromethane ( $CH_2Cl_2$ ), were used as received from Sigma-Aldrich without further purification. Solvents for extraction and chromatography were ACS reagent grade. Reaction yields were determined by crude  $^1H$  NMR analysis using dibromomethane ( $CH_2Br_2$ ) as an internal standard, unless otherwise noted.

**Instrumentation:** NMR spectra were recorded on a Bruker Avance III HD 400 spectrometer.  $^1H$  chemical shifts ( $\delta$ ) are reported in parts per million (ppm) relative to residual solvent peaks ( $CDCl_3$ :  $\delta$  7.26;  $CD_2Cl_2$ :  $\delta$  5.32;  $CD_3OD$ :  $\delta$  3.31).  $^{13}C$  spectra were proton-decoupled and referenced to the solvent resonances ( $CDCl_3$ :  $\delta$  77.16;  $CD_2Cl_2$ :  $\delta$  53.84;  $CD_3OD$ :  $\delta$  49). All spectra were processed using MestReNova 15.0.1 (Mestrelab Research). High-resolution mass spectra (HRMS) were acquired on a Supercritical Fluid Chromatograph combined with a Xevo G2-XS QTOF Mass Spectrometer (Waters, Milford, MA, USA, NFEC-2022-12-283850) at the Chiral Material Core Facility Center of Sungkyunkwan University using an electrospray ionization (ESI) source. For selected compounds (2a, 2b, 2h, 3c, 3d, and 3i), gas chromatography–high-resolution mass spectrometry (GC–HRMS) analyses were performed at the National Center for Inter-University Research Facilities (NCIRF), Seoul National University, using a double-focusing mass spectrometer in electron ionization (EI) mode. Infrared Spectroscopy (IR) were recorded on a Bruker LUMOS FT-IR spectrometer equipped with a microscope and mercury cadmium telluride (MCT) detector.

## 2. Procedures for the Preparation of Starting Materials

### General Experimental Procedures A:

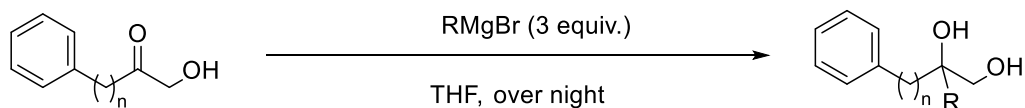

diols were prepared according to the literature procedure.<sup>1</sup> An  $\alpha$ -hydroxy ketone (5.0 mmol) was dissolved in THF (5.0 mL) under a nitrogen atmosphere and cooled to 0 °C. A Grignard reagent (15 mmol, 1.0 M solution in THF; R = aryl or alkyl) was added dropwise, and the reaction mixture was allowed to warm to room temperature and stirred until complete consumption of the starting material as monitored by TLC. The reaction was quenched with saturated aqueous  $NH_4Cl$ , and the resulting mixture was extracted with EtOAc. The combined organic layers were washed with brine, dried over  $Na_2SO_4$ , and concentrated under reduced pressure. The crude residue was purified by silica gel flash column chromatography (n-hexane/EtOAc = 3:1) to afford the corresponding 1,2-diol.

### General Experimental Procedures B:

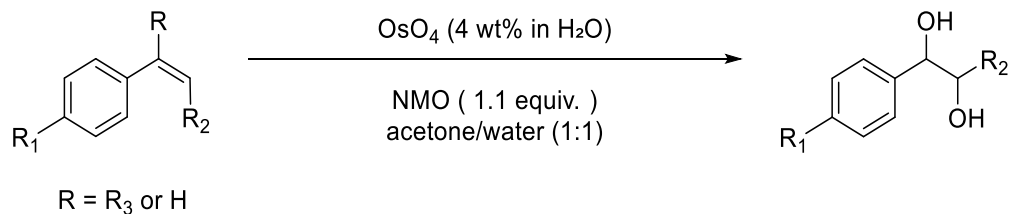

The corresponding diols were obtained according to the published method.<sup>2</sup> An alkene (5.0 mmol) was dissolved in acetone/ $H_2O$  (1:1, 50 mL), and N-methylmorpholine N-oxide (1.1 equiv. ) was added. The solution was cooled to 0 °C, and  $OsO_4$  (5 mol%, 4% aqueous solution) was added. The reaction mixture was then allowed to warm to room temperature and stirred overnight until complete consumption of the starting material as monitored by TLC. The reaction was quenched by the addition of saturated aqueous  $NaHSO_3$  (3 mL) and stirred for an additional 20 min. The mixture was extracted with EtOAc ( $3 \times 30$  mL), and the combined organic extracts were dried over anhydrous  $Na_2SO_4$ , filtered, and concentrated under reduced pressure. The crude product was purified by flash column chromatography on silica gel (EtOAc/hexane = 40:60) to afford the corresponding diol

## 2.1. Starting materials

### 1,1-diphenylethane-1,2-diol (1a)

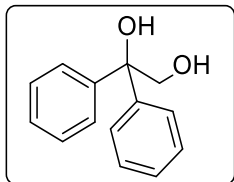

Prepared according to **General Procedure A**.  $^1\text{H NMR}$  (400 MHz,  $\text{CDCl}_3$ )  $\delta$  7.47 – 7.43 (m, 4H), 7.35 (tt,  $J = 6.8, 0.8$  Hz, 4H), 7.30 – 7.26 (m, 2H), 4.18 (d,  $J = 6.5$  Hz, 2H), 3.15 (s, 1H), 1.82 (t,  $J = 6.5$  Hz, 1H).  $^{13}\text{C NMR}$  (100 MHz,  $\text{CDCl}_3$ )  $\delta = 143.93, 128.59, 127.63, 126.53, 78.70, 69.58$ . **IR** ( $\text{CH}_2\text{Cl}_2, \text{cm}^{-1}$ ) 3370, 3057, 3021, 2982, 1442, 1359, 1264, 1103, 1043, 880, 731, 700, 654. **HRMS** (ESI)  $m/z$ :  $[\text{M-H}]^-$  Calcd for  $\text{C}_{14}\text{H}_{13}\text{O}_2^-$ , 213.0921; Found, 213.0915.

### 1-(4-chlorophenyl)-1-phenylethane-1,2-diol (1b)

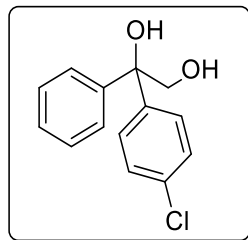

Prepared according to **General Procedure A**.  $^1\text{H NMR}$  (400 MHz,  $\text{CDCl}_3$ )  $\delta = 7.46 - 7.26$  (m, 9H), 4.22 – 4.07 (m, 2H), 3.16 (s, 1H), 1.83 (t,  $J = 6.3$ , 1H).  $^{13}\text{C NMR}$  (100 MHz,  $\text{CDCl}_3$ )  $\delta = 143.52, 142.54, 133.51, 128.71, 128.65, 128.06, 127.84, 126.44, 78.34, 69.35$ . **IR** ( $\text{CH}_2\text{Cl}_2, \text{cm}^{-1}$ ) 3402, 3061, 3029, 2943, 2883, 1490, 1450, 1400, 1265, 1180, 1092, 942, 825, 759, 701. **HRMS** (ESI)  $m/z$ :  $[\text{M-H}]^-$  Calcd for  $\text{C}_{14}\text{H}_{12}\text{ClO}_2^-$ , 247.0531; Found, 247.0523.

### 1-(4-fluorophenyl)-1-phenylethane-1,2-diol (1c)

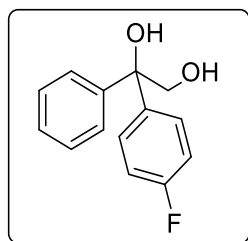

Prepared according to **General Procedure A**.  $^1\text{H NMR}$  (400 MHz,  $\text{CDCl}_3$ )  $\delta = 7.45 - 7.33$  (m, 6H), 7.31 – 7.27 (m, 1H), 7.06 – 6.98 (m, 2H), 4.15 (qdd,  $J = 11.4, 6.3, 1.0$ , 2H), 3.16 (q,  $J = 1.4$ , 1H), 1.83 (q,  $J = 6.3$ , 1H).  $^{13}\text{C NMR}$  (100 MHz,  $\text{CDCl}_3$ )  $\delta = 162.18$  (d,  $J_{\text{CF}} = 247.5$  Hz), 143.75, 139.80 (d,  $J_{\text{CF}} = 3.0$  Hz), 128.66, 128.40 (d,  $J_{\text{CF}} = 8.1$  Hz), 127.76, 126.47, 115.32 (d,  $J_{\text{CF}} = 21.2$  Hz), 78.35, 69.49. **IR** ( $\text{CH}_2\text{Cl}_2, \text{cm}^{-1}$ ) 3402, 3064, 3025, 2943, 2883, 1603, 1507, 1227, 1162, 1066, 946, 833, 758, 700. **HRMS** (ESI)  $m/z$ :  $[\text{M-H}]^-$  Calcd for  $\text{C}_{14}\text{H}_{12}\text{FO}_2^-$ , 231.0827; Found, 231.0820.

### 1-phenyl-1-(p-tolyl)ethane-1,2-diol (1d)

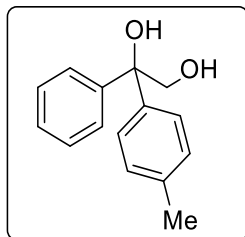

Prepared according to **General Procedure A**.  $^1\text{H NMR}$  (400 MHz,  $\text{CDCl}_3$ )  $\delta$  = 7.48 – 7.40 (m, 2H), 7.38 – 7.30 (m, 4H), 7.28 (t,  $J=1.4$ , 1H), 7.25 (s, 1H), 7.20 – 7.11 (m, 2H), 4.16 (dd,  $J=6.4, 1.4$ , 2H), 3.10 (s, 1H), 2.33 (s, 3H), 1.81 (t,  $J=6.5$ , 1H).  $^{13}\text{C NMR}$  (100 MHz,  $\text{CDCl}_3$ )  $\delta$  = 144.10, 141.00, 137.30, 129.26, 128.52, 127.51, 126.50, 126.46, 78.60, 69.58, 21.15. **IR** ( $\text{CH}_2\text{Cl}_2$ ,  $\text{cm}^{-1}$ ) 3397, 3061, 3028, 2929, 2879, 1448, 1266, 1173, 1064, 936, 815, 757, 700, 652. **HRMS** (ESI)  $m/z$ :  $[\text{M}-\text{H}]^-$  Calcd for  $\text{C}_{15}\text{H}_{15}\text{O}_2^-$ , 227.1077; Found, 227.1071.

### 1-(4-methoxyphenyl)-1-phenylethane-1,2-diol (1e)

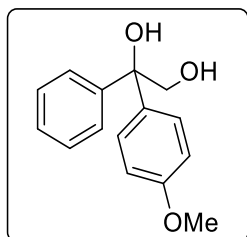

Prepared according to **General Procedure A**.  $^1\text{H NMR}$  (400 MHz,  $\text{CDCl}_3$ )  $\delta$  = 7.47 – 7.40 (m, 2H), 7.39 – 7.31 (m, 4H), 7.29 (t,  $J=1.4$ , 1H), 6.87 (d,  $J=8.9$ , 2H), 4.14 (s, 2H), 3.79 (s, 3H).  $^{13}\text{C NMR}$  (100 MHz,  $\text{CDCl}_3$ )  $\delta$  = 158.97, 144.16, 136.12, 128.51, 127.87, 127.51, 126.52, 113.87, 78.46, 69.62, 55.39. **IR** ( $\text{CH}_2\text{Cl}_2$ ,  $\text{cm}^{-1}$ ) 3418, 3007, 2958, 2836, 1609, 1510, 1450, 1257, 1177, 1034, 830, 755, 702. **HRMS** (ESI)  $m/z$ :  $[\text{M}-\text{H}]^-$  Calcd for  $\text{C}_{15}\text{H}_{15}\text{O}_3^-$ , 243.1026; Found, 243.1021.

### 1-(4-((tert-butyldimethylsilyloxy)phenyl)-1-phenylethane-1,2-diol (1f)

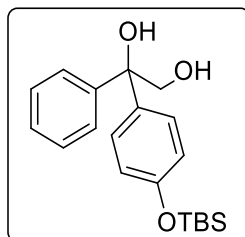

Prepared according to **General Procedure A**.  $^1\text{H NMR}$  (400 MHz,  $\text{CDCl}_3$ )  $\delta$  = 7.45 – 7.40 (m, 2H), 7.37 – 7.31 (m, 2H), 7.30 – 7.26 (m, 3H), 6.82 – 6.77 (m, 2H), 4.13 (d,  $J=1.1$ , 2H), 0.97 (s, 9H), 0.18 (s, 6H).  $^{13}\text{C NMR}$  (100 MHz,  $\text{CDCl}_3$ )  $\delta$  = 155.17, 144.14, 136.57, 128.52, 127.84, 127.53, 126.58, 120.00, 78.55, 69.74, 25.80, 18.32, -4.26. **IR** ( $\text{CH}_2\text{Cl}_2$ ,  $\text{cm}^{-1}$ ) 3403, 3004, 2950, 2854, 1509, 1265, 915, 837, 754. **HRMS** (ESI)  $m/z$ :  $[\text{M}-\text{H}]^-$  Calcd for  $\text{C}_{20}\text{H}_{27}\text{O}_3\text{Si}^-$ , 343.1735; Found,

343.1729.

### 1-([1,1'-biphenyl]-4-yl)-1-phenylethane-1,2-diol (1g)

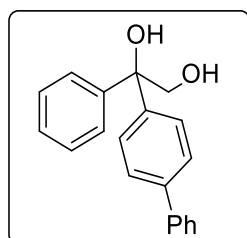

Prepared according to **General Procedure A**.  $^1\text{H NMR}$  (400 MHz,  $\text{CDCl}_3$ )  $\delta$  = 7.60 – 7.54 (m, 4H), 7.53 – 7.47 (m, 4H), 7.46 – 7.40 (m, 2H), 7.39 – 7.27 (m, 4H), 4.22 (d,  $J=6.4$ , 2H), 3.21 (s, 1H), 1.91 (t,  $J=6.5$ , 1H).  $^{13}\text{C NMR}$  (100 MHz,  $\text{CDCl}_3$ )  $\delta$  = 143.89, 142.98, 140.71, 140.42, 128.90, 128.60, 127.64, 127.49, 127.26, 127.20, 127.00, 126.51, 78.61, 69.50. **IR** ( $\text{CH}_2\text{Cl}_2$ ,  $\text{cm}^{-1}$ ) 3463, 3057, 3032, 2893, 1689, 1449, 1268, 1068, 834, 754, 697. **HRMS** (ESI)  $m/z$ :  $[\text{M}-\text{H}]^-$  Calcd for  $\text{C}_{20}\text{H}_{17}\text{O}_2^-$ ,

289.1234; Found, 241.1228.

### 1-(2,6-dimethylphenyl)-1-phenylethane-1,2-diol (1h)

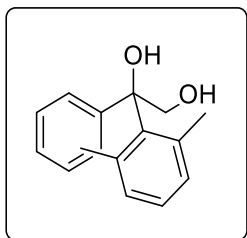

Prepared according to **General Procedure A**.  $^1\text{H NMR}$  (400 MHz,  $\text{CDCl}_3$ )  $\delta$  = 7.37 (d,  $J=1.4$ , 1H), 7.33 – 7.26 (m, 4H), 7.26 – 7.21 (m, 1H), 7.10 – 6.93 (m, 2H), 4.27 (dd,  $J=11.4$ , 4.3, 1H), 3.95 (dd,  $J=11.4$ , 5.3, 1H), 3.09 (s, 1H), 2.39 (s, 3H), 2.00 (s, 3H).  $^{13}\text{C NMR}$  (100 MHz,  $\text{CDCl}_3$ )  $\delta$  = 143.95, 140.91, 135.14, 134.86, 132.98, 128.67, 128.28, 127.32, 127.27, 126.31, 79.09, 70.08, 21.43, 20.97. **IR** ( $\text{CH}_2\text{Cl}_2$ ,  $\text{cm}^{-1}$ ) 3389, 3246, 3007, 1449, 1264, 1048, 897, 814, 753. **HRMS** (ESI)  $m/z$ :  $[\text{M}-\text{H}]^-$  Calcd for  $\text{C}_{16}\text{H}_{17}\text{O}_2^-$ , 241.1234; Found, 241.1234.

### 1-(naphthalen-2-yl)-1-phenylethane-1,2-diol (1i)

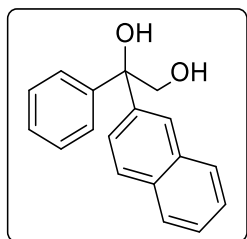

Prepared according to **General Procedure A**.  $^1\text{H NMR}$  (400 MHz,  $\text{CDCl}_3$ )  $\delta$  = 7.98 (d,  $J=1.9$ , 1H), 7.89 – 7.76 (m, 3H), 7.54 – 7.42 (m, 5H), 7.38 – 7.33 (m, 2H), 7.31 – 7.27 (m, 1H), 4.29 (qd,  $J=11.5$ , 6.4, 2H), 3.26 (s, 1H), 1.88 (t,  $J=6.5$ , 1H).  $^{13}\text{C NMR}$  (100 MHz,  $\text{CDCl}_3$ )  $\delta$  = 143.82, 141.26, 133.18, 132.75, 128.62, 128.44, 128.41, 127.71, 127.68, 126.63, 126.41, 126.35, 125.13, 124.91, 78.84, 69.47. **IR** ( $\text{CH}_2\text{Cl}_2$ ,  $\text{cm}^{-1}$ ) 3403, 3061, 3011, 1270, 1065, 818, 754, 702. **HRMS** (ESI)  $m/z$ :  $[\text{M}-\text{H}]^-$  Calcd for  $\text{C}_{18}\text{H}_{15}\text{O}_2^-$ , 263.1077; Found, 263.1074.

### 1-phenyl-1-(thiophen-2-yl)ethane-1,2-diol (1j)

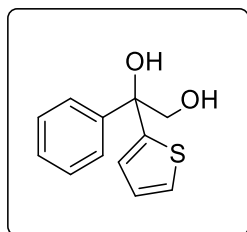

Prepared according to **General Procedure A**.  $^1\text{H NMR}$  (400 MHz,  $\text{CDCl}_3$ )  $\delta$  = 7.56 – 7.48 (m, 2H), 7.41 – 7.27 (m, 4H), 7.06 – 6.87 (m, 2H), 4.22 – 4.04 (m, 2H), 3.39 (d,  $J=2.2$ , 1H), 1.92 (t,  $J=5.9$ , 1H).  $^{13}\text{C NMR}$  (100 MHz,  $\text{CDCl}_3$ )  $\delta$  = 148.82, 142.93, 128.57, 127.99, 126.92, 126.08, 125.77, 124.99, 77.66, 70.74. **IR** ( $\text{CH}_2\text{Cl}_2$ ,  $\text{cm}^{-1}$ ) 3417, 3007, 1270, 754, 709. **HRMS** (ESI)  $m/z$ :  $[\text{M}-\text{H}]^-$  Calcd for  $\text{C}_{12}\text{H}_{11}\text{O}_2\text{S}^-$ , 219.0485; Found, 219.0475.

### 2-phenylpropane-1,2-diol (1k)

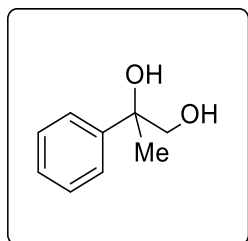

Prepared according to **General Procedure A**.  $^1\text{H NMR}$  (400 MHz,  $\text{CDCl}_3$ )  $\delta$  = 7.52 – 7.43 (m, 2H), 7.38 (dd,  $J=8.6, 6.8$ , 2H), 7.29 (d,  $J=7.2$ , 1H), 3.81 (dd,  $J=11.1, 4.6$ , 1H), 3.65 (dd,  $J=11.1, 8.2$ , 1H), 2.53 (s, 1H), 1.72 (dd,  $J=8.2, 4.7$ , 1H), 1.55 (s, 3H).  $^{13}\text{C NMR}$  (100 MHz,  $\text{CDCl}_3$ )  $\delta$  = 145.09, 128.56, 127.32, 125.21, 74.98, 71.21, 26.15. **IR** ( $\text{CH}_2\text{Cl}_2, \text{cm}^{-1}$ ) 3365, 3061, 2986, 2940, 2879, 1447, 1375, 1269, 1038, 954, 864, 759, 698, 638. **HRMS** (ESI)  $m/z$ :  $[\text{M}-\text{H}]^-$  Calcd for  $\text{C}_9\text{H}_{11}\text{O}_2^-$ , 151.0764; Found, 151.0767.

### 2-(4-hydroxyphenyl)propane-1,2-diol (1l)

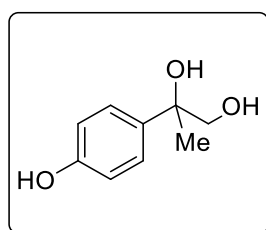

Prepared according to **General Procedure B**.  $^1\text{H NMR}$  (400 MHz,  $\text{CD}_2\text{Cl}_2$ )  $\delta$  = 7.24 – 7.14 (m, 2H), 6.87 – 6.70 (m, 2H), 3.57 (dd,  $J=11.1, 3.9$ , 1H), 3.41 (dd,  $J=11.1, 7.8$ , 1H), 3.07 (d,  $J=1.6$ , 3H), 1.76 (s, 1H).  $^{13}\text{C NMR}$  (100 MHz,  $\text{CD}_2\text{Cl}_2$ )  $\delta$  = 156.81, 133.25, 128.20, 115.48, 79.63, 71.62, 50.37, 19.53. **IR** ( $\text{CH}_2\text{Cl}_2, \text{cm}^{-1}$ ) 3253, 2983, 2943, 2829, 1513, 1450, 1268, 1233, 1173, 1025, 1002, 831, 755. **HRMS** (ESI)  $m/z$ :  $[\text{M}-\text{H}]^-$  Calcd for  $\text{C}_9\text{H}_{11}\text{O}_3^-$ , 167.0713; Found, 167.0706.

### 2-phenylbutane-1,2-diol (1m)

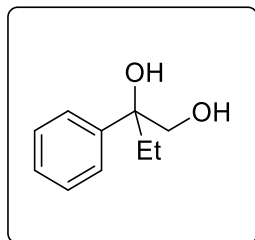

Prepared according to **General Procedure A**.  $^1\text{H NMR}$  (400 MHz,  $\text{CDCl}_3$ )  $\delta$  = 7.44 – 7.34 (m, 4H), 7.30 – 7.26 (m, 1H), 3.86 (d,  $J=11.1$ , 1H), 3.70 (d,  $J=11.1$ , 1H), 2.56 (s, 1H), 1.85 (p,  $J=7.4$ , 2H), 1.60 (s, 1H), 0.78 (t,  $J=7.5$ , 3H).  $^{13}\text{C NMR}$  (100 MHz,  $\text{CDCl}_3$ )  $\delta$  = 143.31, 128.51, 127.15, 125.75, 77.62, 70.54, 31.26, 7.53. **IR** ( $\text{CH}_2\text{Cl}_2, \text{cm}^{-1}$ ) 3386, 2972, 2943, 2883, 1451, 1269, 1052, 756, 701. **HRMS** (ESI)  $m/z$ :  $[\text{M}-\text{H}]^-$  Calcd for  $\text{C}_{10}\text{H}_{13}\text{O}_2^-$ , 165.0921; Found, 165.0913.

### 2,3-diphenylpropane-1,2-diol (1n)

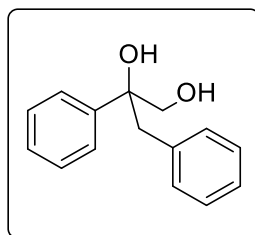

Prepared according to **General Procedure A**.  $^1\text{H NMR}$  (400 MHz,  $\text{CDCl}_3$ )  $\delta$  = 7.38 – 7.31 (m, 4H), 7.31 – 7.26 (m, 1H), 7.24 – 7.12 (m, 3H), 7.00 – 6.89 (m, 2H), 3.90 – 3.74 (m, 2H), 3.23 – 3.09 (m, 2H), 2.46 (s, 1H), 1.78 (s, 1H).  $^{13}\text{C NMR}$  (100 MHz,  $\text{CD}_2\text{Cl}_2$ )  $\delta$  = 143.96, 136.58, 130.96, 128.53, 128.33, 127.41, 126.92, 126.08, 77.42, 69.91, 45.21. **IR** ( $\text{CH}_2\text{Cl}_2, \text{cm}^{-1}$ ) 3403, 3029, 2943, 2883, 1450, 1269, 1066, 755, 700. **HRMS** (ESI)  $m/z$ :  $[\text{M}-\text{H}]^-$  Calcd for  $\text{C}_{15}\text{H}_{15}\text{O}_2^-$ , 227.1077; Found, 227.1070.

### 2-methyl-4-phenylbutane-1,2-diol (1o)

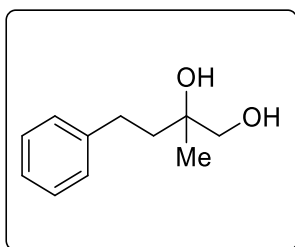

Prepared according to **General Procedure A**.  $^1\text{H NMR}$  (400 MHz,  $\text{CDCl}_3$ )  $\delta = 7.29$  (dd,  $J=8.1, 6.9, 2\text{H}$ ),  $7.25 - 7.11$  (m, 3H),  $3.65 - 3.33$  (m, 2H),  $2.71$  (ddd,  $J=9.6, 6.7, 2.2, 2\text{H}$ ),  $1.90 - 1.76$  (m, 2H),  $1.67$  (s, 2H),  $1.26$  (s, 3H).  $^{13}\text{C NMR}$  (101 MHz,  $\text{CDCl}_3$ )  $\delta = 142.36, 128.61, 128.44, 126.03, 72.93, 70.00, 40.62, 30.23, 23.48$ . **IR** ( $\text{CH}_2\text{Cl}_2, \text{cm}^{-1}$ ) 3371, 3028, 2979, 2940, 2872, 1456, 1271, 1051, 919, 753, 699. **HRMS** (ESI)  $m/z$ :  $[\text{M}-\text{H}]^-$  Calcd for  $\text{C}_{11}\text{H}_{15}\text{O}_2^-$ , 179.1077; Found, 179.1069.

### 2-ethyl-4-phenylbutane-1,2-diol (1p)

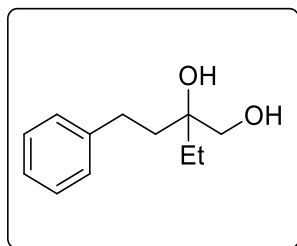

Prepared according to **General Procedure A**.  $^1\text{H NMR}$  (400 MHz,  $\text{CDCl}_3$ )  $\delta = 7.31 - 7.26$  (m, 2H),  $7.23 - 7.15$  (m, 3H),  $3.53$  (s, 2H),  $2.72 - 2.58$  (m, 2H),  $1.79$  (ddt,  $J=11.7, 6.2, 3.0, 2\text{H}$ ),  $1.62$  (dddd,  $J=11.8, 9.1, 6.0, 2.8, 2\text{H}$ ),  $0.94$  (td,  $J=7.6, 2.4, 3\text{H}$ ).  $^{13}\text{C NMR}$  (100 MHz,  $\text{CDCl}_3$ )  $\delta = 142.42, 128.54, 128.38, 125.95, 75.07, 67.63, 37.21, 29.84, 28.32, 8.02$ . **IR** ( $\text{CH}_2\text{Cl}_2, \text{cm}^{-1}$ ) 3372, 3025, 2940, 2879, 1455, 1400, 1270, 1053, 897, 753, 698. **HRMS** (ESI)  $m/z$ :  $[\text{M}-\text{H}]^-$  Calcd for  $\text{C}_{12}\text{H}_{17}\text{O}_2^-$ , 193.1234; Found, 193.1225.

### 2-benzyl-4-phenylbutane-1,2-diol (1q)

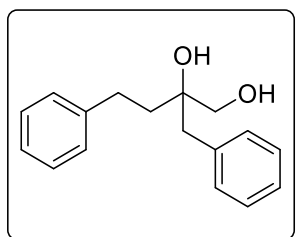

Prepared according to **General Procedure A**.  $^1\text{H NMR}$  (400 MHz,  $\text{CDCl}_3$ )  $\delta = 7.36 - 7.30$  (m, 2H),  $7.30 - 7.26$  (m, 5H),  $7.19$  (d,  $J=7.2, 3\text{H}$ ),  $3.54$  (d,  $J=1.4, 2\text{H}$ ),  $2.91$  (s, 2H),  $2.77$  (dd,  $J=10.8, 6.5, 2\text{H}$ ),  $1.79$  (dddd,  $J=8.4, 7.0, 4.5, 1.4, 2\text{H}$ ),  $1.63$  (s, 2H).  $^{13}\text{C NMR}$  (100 MHz,  $\text{CDCl}_3$ )  $\delta = 142.27, 136.84, 130.50, 128.67, 128.61, 128.45, 126.92, 126.05, 74.61, 67.35, 42.72, 38.41, 29.99$ . **IR** ( $\text{CH}_2\text{Cl}_2, \text{cm}^{-1}$ ) 3344, 3027, 2941, 2868, 1495, 1453, 1272, 1035, 913, 751, 700. **HRMS** (ESI)  $m/z$ :  $[\text{M}-\text{H}]^-$  Calcd for  $\text{C}_{17}\text{H}_{19}\text{O}_2^-$ , 255.1390; Found, 255.1383.

### 2-phenethylbut-3-ene-1,2-diol (1r)

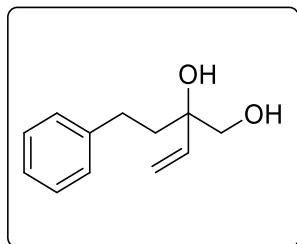

Prepared according to **General Procedure A**.  $^1\text{H NMR}$  (400 MHz,  $\text{CDCl}_3$ )  $\delta$  = 7.31 – 7.26 (m, 2H), 7.20 – 7.16 (m, 3H), 5.94 – 5.80 (m, 1H), 5.46 – 5.31 (m, 2H), 3.60 – 3.50 (m, 2H), 2.76 – 2.62 (m, 2H), 1.95 – 1.89 (m, 1H), 1.83 – 1.77 (m, 1H).  $^{13}\text{C NMR}$  (100 MHz,  $\text{CDCl}_3$ )  $\delta$  = 142.32, 140.61, 128.59, 128.47, 126.02, 115.93, 76.09, 69.07, 38.88, 29.67. **IR** ( $\text{CH}_2\text{Cl}_2$ ,  $\text{cm}^{-1}$ ) 3393, 3025, 2940, 2868, 1454, 1267, 1035, 923, 748, 700. **HRMS** (ESI)  $m/z$ :  $[\text{M-H}]^-$  Calcd for  $\text{C}_{12}\text{H}_{15}\text{O}_2^-$ , 191.1077; Found, 191.1069.

### 2-phenethylpent-4-ene-1,2-diol (1s)

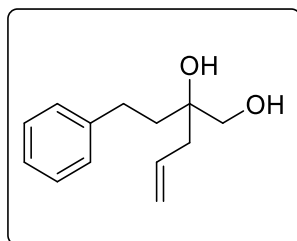

Prepared according to **General Procedure A**.  $^1\text{H NMR}$  (400 MHz,  $\text{CDCl}_3$ )  $\delta$  = 7.31 – 7.26 (m, 2H), 7.22 – 7.16 (m, 3H), 5.95 – 5.80 (m, 1H), 5.23 – 5.19 (m, 1H), 5.18 (t,  $J=1.1$ , 1H), 3.54 (s, 2H), 2.75 – 2.65 (m, 2H), 2.37 (dt,  $J=7.5$ , 1.1, 2H), 1.83 – 1.79 (m, 2H).  $^{13}\text{C NMR}$  (100 MHz,  $\text{CDCl}_3$ )  $\delta$  = 142.32, 133.35, 128.62, 128.44, 126.06, 119.32, 74.14, 67.97, 41.03, 38.47, 29.86. **IR** ( $\text{CH}_2\text{Cl}_2$ ,  $\text{cm}^{-1}$ ) 3373, 3075, 3029, 2937, 2872, 1641, 1495, 1451, 1272, 1034, 914, 750, 697. **HRMS** (ESI)  $m/z$ :  $[\text{M-H}]^-$  Calcd for  $\text{C}_{13}\text{H}_{17}\text{O}_2^-$ , 205.1234; Found, 205.1228.

### 1,1-diphenylpropane-1,2-diol (1t)

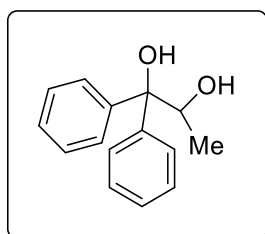

Prepared according to **General Procedure B**.  $^1\text{H NMR}$  (400 MHz,  $\text{CDCl}_3$ )  $\delta$  = 7.65 – 7.59 (m, 2H), 7.47 – 7.41 (m, 2H), 7.36 (dd,  $J=8.5$ , 7.0, 2H), 7.32 – 7.27 (m, 2H), 7.25 – 7.15 (m, 2H), 4.91 – 4.76 (m, 1H), 2.96 (s, 1H), 1.83 (d,  $J=3.8$ , 1H), 1.12 (d,  $J=6.3$ , 3H).  $^{13}\text{C NMR}$  (100 MHz,  $\text{CDCl}_3$ )  $\delta$  = 145.72, 144.02, 128.79, 128.29, 127.40, 126.92, 126.36, 125.69, 80.03, 71.76, 16.78. **IR** ( $\text{CH}_2\text{Cl}_2$ ,  $\text{cm}^{-1}$ ) 3448, 3057, 3029, 2983, 2940, 1449, 1267, 1070, 997, 889, 754, 700, 656. **HRMS** (ESI)  $m/z$ :  $[\text{M-H}]^-$  Calcd for  $\text{C}_{15}\text{H}_{15}\text{O}_2^-$ , 227.1077; Found, 227.1068.

### 1-phenylcyclohexane-1,2-diol (**1u**)

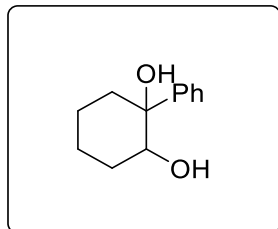

Prepared according to **General Procedure B**.  $^1\text{H NMR}$  (400 MHz,  $\text{CDCl}_3$ )  $\delta$  = 7.53 – 7.46 (m, 2H), 7.36 (dd,  $J=8.4, 7.0$ , 2H), 7.25 (tt,  $J=6.8, 1.3$ , 1H), 4.06 – 3.84 (m, 1H), 2.62 (s, 1H), 1.91 – 1.79 (m, 3H), 1.75 – 1.60 (m, 4H), 1.53 (dtdd,  $J=10.3, 4.2, 3.4, 1.5$ , 1H), 1.46 – 1.33 (m, 1H).  $^{13}\text{C NMR}$  (100 MHz,  $\text{CDCl}_3$ )  $\delta$  = 146.48, 128.57, 127.12, 125.24, 75.89, 74.64, 38.63, 29.34, 24.48, 21.19. **IR** ( $\text{CH}_2\text{Cl}_2$ ,  $\text{cm}^{-1}$ ) 3418, 3025, 2938, 2865, 1454, 1270, 1060, 997, 755, 700. **HRMS** (ESI)  $m/z$ :  $[\text{M-H}]^-$  Calcd for  $\text{C}_{12}\text{H}_{15}\text{O}_2^-$ , 191.1077; Found, 191.1067.

### 1,1-diphenylpropane-1,3-diol (**1v**)

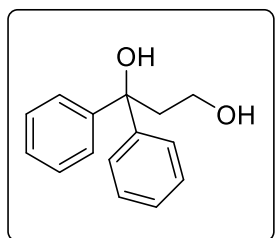

Prepared according to **General Procedure A**.  $^1\text{H NMR}$  (400 MHz,  $\text{CDCl}_3$ )  $\delta$  = 7.33 – 7.22 (m, 8H), 7.21 – 7.14 (m, 2H), 4.13 (s, 1H), 3.60 (t,  $J=6.4$ , 2H), 2.31 (dt,  $J=7.9, 6.4$ , 2H), 1.37 – 1.18 (m, 1H).  $^{13}\text{C NMR}$  (100 MHz,  $\text{CDCl}_3$ )  $\delta$  = 144.61, 128.67, 127.99, 126.42, 61.24, 47.49, 38.35. **IR** ( $\text{CH}_2\text{Cl}_2$ ,  $\text{cm}^{-1}$ ) 3356, 3059, 3032, 2958, 2893, 1491, 1447, 1264, 1183, 1057, 852, 756, 699, 643. **HRMS** (ESI)  $m/z$ :  $[\text{M-H}]^-$  Calcd for  $\text{C}_{15}\text{H}_{15}\text{O}_2^-$ , 227.1077; Found, 227.1068.

### 1,1-diphenylbutane-1,4-diol (**1w**)

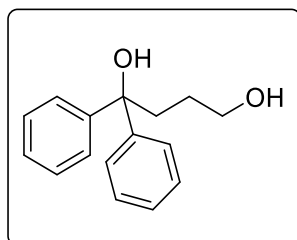

$^1\text{H NMR}$  (400 MHz,  $\text{CDCl}_3$ )  $\delta$  = 7.46 – 7.39 (m, 4H), 7.34 – 7.27 (m, 4H), 7.25 – 7.17 (m, 2H), 3.68 (t,  $J=6.0$ , 2H), 2.48 – 2.38 (m, 2H), 1.64 – 1.56 (m, 2H).  $^{13}\text{C NMR}$  (100 MHz,  $\text{CD}_2\text{Cl}_2$ )  $\delta$  = 145.05, 128.60, 127.97, 126.31, 63.04, 51.28, 31.98, 31.46. **IR** ( $\text{CH}_2\text{Cl}_2$ ,  $\text{cm}^{-1}$ ) 3365, 3057, 3036, 2950, 2876, 1447, 1269, 1053, 1012, 972, 754, 700. **HRMS** (ESI)  $m/z$ :  $[\text{M-H}]^-$  Calcd for  $\text{C}_{16}\text{H}_{17}\text{O}_2^-$ , 241.1234; Found, 241.1227.

### 1-phenylpropane-1,3-diol (**1x**)

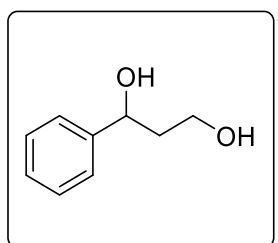

The  $^1\text{H}$  and  $^{13}\text{C}$  NMR spectra are identical to those previously reported.<sup>3</sup> **IR** ( $\text{CH}_2\text{Cl}_2$ ,  $\text{cm}^{-1}$ ) 3320, 2945, 2886, 1451, 1336, 1273, 1211, 1048, 918, 754, 698. **HRMS** (ESI)  $m/z$ :  $[\text{M-H}]^-$  Calcd for  $\text{C}_9\text{H}_{11}\text{O}_2^-$ , 151.0764; Found, 151.0755.

### 1-phenylpropane-1,2-diol (1y)

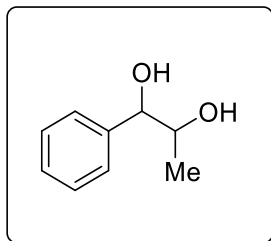

Prepared according to **General Procedure B**.  $^1\text{H NMR}$  (400 MHz,  $\text{CDCl}_3$ )  $\delta$  7.37 (d,  $J = 4.4$  Hz, 4H), 7.34 – 7.28 (m, 1H), 4.69 (dd,  $J = 4.5, 2.7$  Hz, 1H), 4.03 (d,  $J = 5.2$  Hz, 1H), 2.29 (s, 1H), 1.81 (s, 1H), 1.10 (d,  $J = 6.4$  Hz, 3H).  $^{13}\text{C NMR}$  (100 MHz, MeOD)  $\delta = 143.41, 128.97, 128.25, 128.05, 79.04, 72.40, 18.15$ . **IR** ( $\text{CH}_2\text{Cl}_2, \text{cm}^{-1}$ ) 3366, 3064, 3032, 2983, 2890, 1451, 1382, 1266, 1127, 1074, 992, 933, 858, 749, 700. **HRMS** (ESI)  $m/z$ :  $[\text{M}-\text{H}]^-$  Calcd for  $\text{C}_9\text{H}_{11}\text{O}_2^-$ , 151.0764; Found, 151.0755.

### 1-(4-methoxyphenyl)propane-1,2-diol (1z)

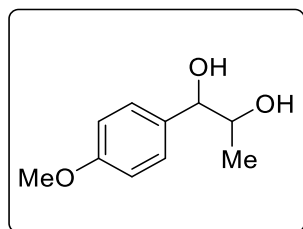

Prepared according to **General Procedure B**.  $^1\text{H NMR}$  (400 MHz,  $\text{CDCl}_3$ )  $\delta = 7.28$  (s, 1H), 7.26 (s, 1H), 6.89 (d,  $J=8.7$ , 2H), 4.33 (d,  $J=7.6$ , 1H), 3.90 – 3.82 (m, 1H), 3.81 (s, 3H), 2.44 (s, 2H), 1.05 (d,  $J=6.3$ , 3H).  $^{13}\text{C NMR}$  (100 MHz,  $\text{CDCl}_3$ )  $\delta = 159.63, 133.31, 128.17, 114.07, 79.31, 72.44, 55.43, 18.88$ . **IR** ( $\text{CH}_2\text{Cl}_2, \text{cm}^{-1}$ ) 3377, 2975, 2933, 2897, 2836, 1612, 1513, 1458, 1247, 1177, 1128, 1030, 829, 751. **HRMS** (ESI)  $m/z$ :  $[\text{M}-\text{H}]^-$  Calcd for  $\text{C}_{10}\text{H}_{13}\text{O}_3^-$ , 181.0870; Found, 181.0869

### 1-(benzo[d][1,3]dioxol-5-yl)propane-1,2-diol (1aa')

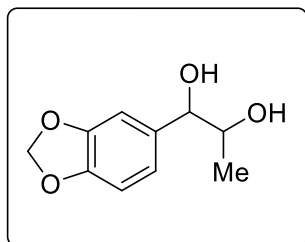

Prepared according to **General Procedure B**.  $^1\text{H NMR}$  (400 MHz,  $\text{CDCl}_3$ )  $\delta = 6.85$  (d,  $J=1.4$ , 1H), 6.82 – 6.75 (m, 2H), 5.96 (s, 2H), 4.29 (d,  $J=7.5$ , 1H), 3.81 (dq,  $J=7.6, 6.3$ , 1H), 2.51 (s, 2H), 1.05 (d,  $J=6.3$ , 3H).  $^{13}\text{C NMR}$  (100 MHz,  $\text{CDCl}_3$ )  $\delta = 147.98, 147.57, 135.13, 120.57, 108.33, 107.22, 101.24, 79.51, 72.41, 18.93$ . **IR** ( $\text{CH}_2\text{Cl}_2, \text{cm}^{-1}$ ) 3375, 2983, 2893, 1488, 1441, 1242, 1123, 1093, 1032, 929, 809, 749, 632. **HRMS** (ESI)  $m/z$ :  $[\text{M}-\text{H}]^-$  Calcd for  $\text{C}_{10}\text{H}_{11}\text{O}_4^-$ , 195.0663; Found, 195.0655

### 1-(4-hydroxy-3-methoxyphenyl)propane-1,2-diol (1ab')

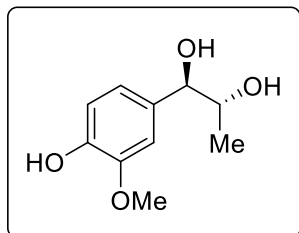

Prepared according to **General Procedure B**.  $^1\text{H NMR}$  (400 MHz, MeOD)  $\delta$  = 6.96 (d,  $J=1.6$ , 1H), 6.78 (s, 2H), 4.26 (d,  $J=7.3$ , 1H), 3.87 (s, 3H), 3.82 – 3.77 (m, 1H), 0.97 (d,  $J=6.4$ , 3H).  $^{13}\text{C NMR}$  (100 MHz, MeOD)  $\delta$  = 148.81, 147.12, 134.76, 120.97, 115.81, 111.55, 80.26, 72.97, 56.33, 19.29. **IR** ( $\text{CH}_2\text{Cl}_2$ ,  $\text{cm}^{-1}$ ) 3382, 2968, 2936, 2883, 2844, 1710, 1607, 1516, 1456, 1368, 1269, 1123, 1031, 855, 819, 747. **HRMS** (ESI)  $m/z$ :  $[\text{M}-\text{H}]^-$  Calcd for  $\text{C}_{10}\text{H}_{13}\text{O}_4^-$ , 197.0819; Found, 197.0811.

### 1-(benzo[d][1,3]dioxol-5-yl)-4,4-dimethylpentane-1,2,3-triol (1ac)

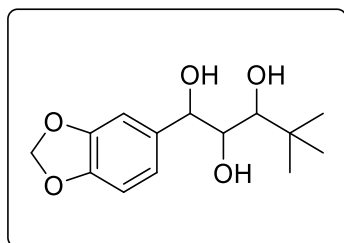

Prepared according to **General Procedure B**.  $^1\text{H NMR}$  (400 MHz, MeOD)  $\delta$  = 6.99 (d,  $J=1.6$ , 1H), 6.91 – 6.84 (m, 1H), 6.78 (d,  $J=8.0$ , 1H), 5.92 (d,  $J=0.9$ , 2H), 5.02 (d,  $J=1.5$ , 1H), 3.56 (dd,  $J=7.9$ , 1.5, 1H), 3.42 (d,  $J=8.0$ , 1H), 1.02 (s, 9H).  $^{13}\text{C NMR}$  (100 MHz, MeOD)  $\delta$  = 148.84, 147.82, 138.90, 120.52, 108.58, 108.30, 102.06, 79.93, 77.11, 74.14, 35.77, 27.21. **IR** ( $\text{CH}_2\text{Cl}_2$ ,  $\text{cm}^{-1}$ ) 3395, 2959, 2879, 1490, 1442, 1260, 1037, 932, 754. **HRMS** (ESI)  $m/z$ :  $[\text{M}-\text{H}]^-$  Calcd for  $\text{C}_{14}\text{H}_{19}\text{O}_5^-$ , 267.1238; Found, 267.1230.

### 3. Procedures for the Optimization Study

#### 3.1. General Experimental Procedures

Inside an argon-filled glovebox, substrate **1a** (0.1 mmol, 1.0 equiv.) and  $B(C_6F_5)_3$  (2.56 mg, 5 mol %) were dissolved in  $CH_2Cl_2$  (0.5 ml) in a 4-ml screw-cap vial equipped with a magnetic stir bar. The silane was added dropwise to the solution, the vial was then closed and the reaction mixture was stirred for another 8 hours before it was quenched with TBAF solution (150  $\mu$ l, 0.15 mmol, 1.5 equiv.). The yield of the corresponding products and remaining starting materials was determined by  $^1H$ -NMR analysis of the crude-reaction mixture using  $CH_2Br_2$  as the analytical standard. Flash column chromatography was performed using a Teledyne ISCO CombiFlash NextGen 300+ automated flash chromatography system equipped with RediSep Bronze normal-phase silica cartridges (4 g, 40–60  $\mu$ m, 230–400 mesh, 55–60  $\text{\AA}$  pore size), using hexane/ethyl acetate (95:5 v/v) as the eluent.

**Table S1.** Optimization of the silane loading

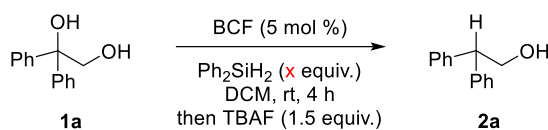

| Entry | amount of silane (x equiv.) | yield (%) <sup>a</sup> |
|-------|-----------------------------|------------------------|
| 1     | 1.3                         | 88                     |
| 2     | 1.0                         | 84                     |
| 3     | 0.8                         | 87                     |
| 4     | 0.5                         | 60                     |

<sup>a</sup>Yield was determined by  $^1H$  NMR using  $CH_2Br_2$  as the internal standard.

The effect of the silane loading on the BCF-catalyzed deoxygenation was examined using substrate **1a**. Varying the amount of  $Ph_2SiH_2$  revealed that the reaction efficiency remained high even with substoichiometric silane quantities (Table S1). When 1.3 equiv. of silane was employed, product **2a** was obtained in 88% yield, while 1.0 equiv. gave a comparable yield of 84%. Remarkably, decreasing the silane loading to 0.8 equiv. still afforded **2a** in 87% yield, indicating that the BCF–silane system effectively promotes hydride transfer under silane-limited conditions. However, a further decrease to 0.5 equiv. led to a notable drop in yield (60%), suggesting insufficient hydride availability for complete reduction. Thus, 0.8 equiv. of  $Ph_2SiH_2$  was chosen as the optimal condition, as it provides excellent yield while minimizing reagent consumption, demonstrating the high silane economy and turnover efficiency of this catalytic system.

**Table S2.** Screening of silane reducing agents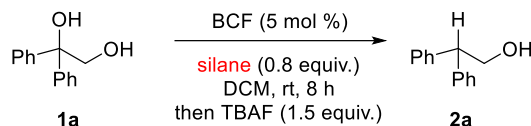

| entry | silane                           | yield(%) <sup>a</sup> |
|-------|----------------------------------|-----------------------|
| 1     | PhSiH <sub>3</sub>               | 85                    |
| 2     | Ph <sub>2</sub> SiH <sub>2</sub> | 88                    |
| 3     | Ph <sub>3</sub> SiH              | N.R                   |
| 4     | Et <sub>2</sub> SiH <sub>2</sub> | 34                    |
| 5     | Et <sub>3</sub> SiH              | 23 <sup>b</sup>       |

<sup>a</sup>Yield was determined by <sup>1</sup>H NMR using CH<sub>2</sub>Br<sub>2</sub> as the internal standard. <sup>b</sup>The reaction using this silane was conducted for 24 h.

To identify the most effective hydride source for the BCF-catalyzed deoxygenation, various silanes were evaluated (Table S2). Among them, Ph<sub>2</sub>SiH<sub>2</sub> provided the highest yield of **2a** (88%), demonstrating superior hydride transfer efficiency and compatibility with the catalytic system. Although PhSiH<sub>3</sub> also gave a high yield (85%), its performance was slightly lower than that of Ph<sub>2</sub>SiH<sub>2</sub>, leading to the selection of Ph<sub>2</sub>SiH<sub>2</sub> as the optimal reducing agent. In contrast, bulkier or less reactive silanes such as Ph<sub>3</sub>SiH, Et<sub>2</sub>SiH<sub>2</sub>, and Et<sub>3</sub>SiH showed poor conversion or no reaction, indicating that both steric and electronic factors critically affect reactivity. Nevertheless, PhSiH<sub>3</sub> was employed in certain substrate scopes where its reactivity offered practical advantages.

**Table S3.** Optimization of the B(C<sub>6</sub>F<sub>5</sub>)<sub>3</sub> loading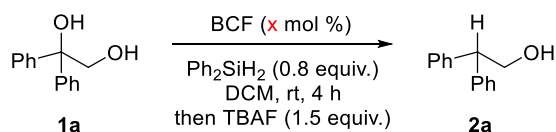

| entry | amount of BCF | yield(%) <sup>a</sup> |
|-------|---------------|-----------------------|
| 1     | 1 mol %       | 67                    |
| 2     | 3 mol %       | 81.5                  |
| 3     | 5 mol %       | 87                    |
| 4     | 10 mol %      | 90                    |

<sup>a</sup>Yield was determined by <sup>1</sup>H NMR using CH<sub>2</sub>Br<sub>2</sub> as the internal standard.

The effect of catalyst loading on the BCF-catalyzed deoxygenation was investigated by varying the molar percentage of BCF (Table S3). The yield of **2a** increased steadily with higher catalyst loading, from 67% at 1 mol % to 87% at 5 mol %. A further increase to 10 mol % afforded **2a** in 90% yield, showing only a marginal improvement. Considering both reactivity and efficiency, 5 mol % of BCF was selected as the optimal catalyst loading, providing reliable performance across substrates.

**Table S4** Optimization of the solvent

$$\text{Ph}-\text{C}(\text{OH})(\text{Ph})-\text{CH}_2\text{OH} \xrightarrow[\text{then TBAF (1.5 equiv.)}]{\text{BCF (5 mol \%), Ph}_2\text{SiH}_2 \text{ (0.8 equiv.) in solvent, rt, 4 h}} \text{Ph}-\text{C}(\text{H})(\text{Ph})-\text{CH}_2\text{OH}$$

**1a**  **2a**

| entry | solvent | yield(%) <sup>a</sup> |
|-------|---------|-----------------------|
| 1     | DCM     | 87                    |
| 2     | Toluene | 68                    |
| 3     | THF     | N.R.                  |
| 4     | Hexane  | 61                    |
| 5     | Pentane | 74                    |

<sup>a</sup>Yield was determined by <sup>1</sup>H NMR using CH<sub>2</sub>Br<sub>2</sub> as the internal standard.

The influence of solvent on the BCF-catalyzed deoxygenation of **1a** was examined under otherwise identical conditions (Table S4). Among the solvents tested, DCM afforded the highest yield of **2a** (87%), indicating that a moderately polar, non-coordinating environment is favorable for efficient hydride transfer. In contrast, reactions conducted in toluene, hexane, or pentane gave lower yields, while THF resulted in no reaction, likely due to coordination of the ether oxygen to BCF, which inhibits catalyst activity. Therefore, DCM was selected as the optimal solvent, providing the best balance between catalyst stability and reactivity.

**Table S5.** Optimization of the atmosphere

| entry | reaction atmosphere              | yield(%) <sup>a</sup> |
|-------|----------------------------------|-----------------------|
| 1     | air                              | 64                    |
| 2     | air + H <sub>2</sub> O(1 equiv.) | N.R.                  |
| 3     | Ar                               | 87                    |

<sup>a</sup>Yield was determined by <sup>1</sup>H NMR using CH<sub>2</sub>Br<sub>2</sub> as the internal standard.

The effect of reaction atmosphere on the BCF-catalyzed deoxygenation was investigated (Table S5). The reaction performed under air afforded **2a** in a moderate yield (64%), whereas the presence of moisture (air + H<sub>2</sub>O) completely suppressed product formation, indicating that both oxygen and water strongly deactivate the Lewis acidic catalyst. In contrast, conducting the reaction under an argon atmosphere provided a significantly improved yield of 87%, demonstrating that strict exclusion of moisture and oxygen is essential for efficient catalysis. Therefore, the reaction was carried out under argon in subsequent studies as the optimal atmosphere.

**Table S6.** Optimization of the reaction time

| entry | reaction time | yield(%) <sup>a</sup> |
|-------|---------------|-----------------------|
| 1     | 4 h           | 87                    |
| 2     | 8 h           | 99                    |
| 3     | 16 h          | > 99                  |
| 4     | 24 h          | > 99                  |

<sup>a</sup>Yield was determined by <sup>1</sup>H NMR using CH<sub>2</sub>Br<sub>2</sub> as the internal standard.

To determine the optimal reaction duration, the BCF-catalyzed deoxygenation of **1a** was monitored over time (Table S6). The reaction progressed smoothly, affording **2a** in 87% yield after 4 h, and the yield increased to 99% after 8 h, indicating nearly complete conversion. Extending the reaction period to 16 or 24 h gave no further improvement (>99%), suggesting that the transformation reaches completion within 8 h. Thus, 8 h was established as the optimal reaction time, balancing high yield and operational efficiency.

**Table S7.** Optimization of the silane loading screening under 40 °C

Reaction scheme: **1a** (1-phenyl-2-phenylethanol-1-ol) reacts with BCF (5 mol %), Ph<sub>2</sub>SiH<sub>2</sub> (x equiv.), DCM, 40 °C, 4 h, then TBAF (1.5 equiv.) to yield **2a** (1-phenyl-2-phenylethanol).

| entry | Equivalents of silane | yield(%) <sup>a</sup> |
|-------|-----------------------|-----------------------|
| 1     | 1.3 equiv.            | 85                    |
| 2     | 1.0 equiv.            | 89                    |
| 3     | 0.8 equiv.            | 83                    |
| 4     | 0.5 equiv.            | 63                    |

<sup>a</sup>Yield was determined by <sup>1</sup>H NMR using CH<sub>2</sub>Br<sub>2</sub> as the internal standard.

The effect of silane equivalents on the BCF-catalyzed deoxygenation was also examined at elevated temperature (40 °C) to assess whether heating could further enhance conversion (Table S7). Similar trends were observed to those obtained under ambient conditions, with Ph<sub>2</sub>SiH<sub>2</sub> (1.0 equiv.) providing the highest yield of **2a** (89%). Increasing or decreasing the silane amount resulted in slightly lower yields, suggesting that the reaction remains efficient without excess hydride donor even at higher temperature. Overall, temperature was found to have no significant effect on the conversion for this substrate, and heating was applied only for specific substrates that exhibited lower reactivity under standard conditions.

**Table S8.** Comparison of Lewis acid catalysts under the standard conditions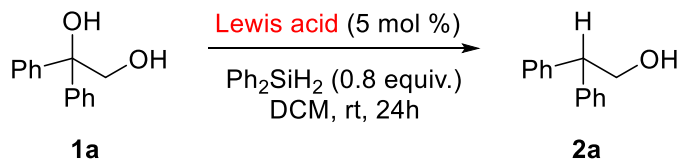

| entry | Lewis acid (cat.)                  | conversion(%) <sup>a</sup> | yield(%) <sup>a</sup> |
|-------|------------------------------------|----------------------------|-----------------------|
| 1     | BF <sub>3</sub> ·Et <sub>2</sub> O | full conversion            | 6                     |
| 2     | InCl <sub>3</sub>                  | 56                         | N.D.                  |
| 3     | Pd/C                               | N.R.                       | N.R.                  |
| 4     | Cp <sub>2</sub> *TiCl <sub>2</sub> | N.R.                       | N.R.                  |
| 5     | Sc(OTf) <sub>3</sub>               | full conversion            | N.D.                  |

<sup>a</sup>Conversion and yield were determined by <sup>1</sup>H NMR using CH<sub>2</sub>Br<sub>2</sub> as the internal standard.

The performance of conventional Lewis acid catalysts was evaluated under the standard reaction conditions to assess whether similar reactivity could be achieved compared to B(C<sub>6</sub>F<sub>5</sub>)<sub>3</sub> catalytic system (Table S8). When BF<sub>3</sub>·Et<sub>2</sub>O was employed as the Lewis acid catalyst, full consumption of the starting material was observed; however, the desired deoxygenated product 2a was obtained in only 6% yield (entry 1). InCl<sub>3</sub> resulted in partial conversion of the substrate, but no detectable amount of the target product was formed (entry 2). Other Lewis acids, including Pd/C and Cp<sub>2</sub>TiCl<sub>2</sub>, showed no reactivity under these conditions, and the starting material was largely recovered (entries 3 and 4). Although Sc(OTf)<sub>3</sub> led to full conversion of the substrate, formation of 2a was not observed (entry 5). Notably, in the cases of BF<sub>3</sub>·Et<sub>2</sub>O, InCl<sub>3</sub>, and Sc(OTf)<sub>3</sub>, additional aldehyde signals were detected in the crude NMR spectra, indicating the involvement of competing, non-productive reaction pathways rather than selective deoxygenation.

#### 4. Procedures for the BCF-catalyzed regioselective deoxygenation of diol

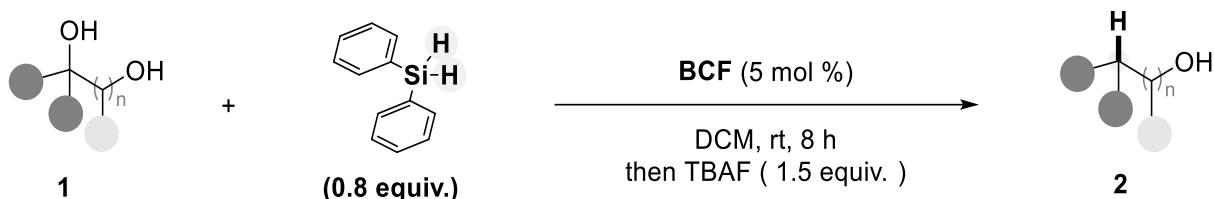

Inside an argon-filled glovebox, diols (0.1 mmol, 1.0 equiv.) and  $\text{B}(\text{C}_6\text{F}_5)_3$  (2.56 mg, 5 mol %) were dissolved in  $\text{CH}_2\text{Cl}_2$  (0.5 ml) in a 4-ml screw-cap vial equipped with a magnetic stir bar. The silane was added dropwise to the solution, the vial was then closed and the reaction mixture was stirred for 8 hours before it was quenched with TBAF solution (150  $\mu\text{l}$ , 0.15 mmol, 1.5 equiv.). The yield of the corresponding products and remaining starting materials was determined by  $^1\text{H}$ -NMR analysis of the crude-reaction mixture using  $\text{CH}_2\text{Br}_2$  as the analytical standard. Flash column chromatography was performed using a Teledyne ISCO CombiFlash NextGen 300+ automated flash chromatography system equipped with RediSep Bronze normal-phase silica cartridges (4 g, 40–60  $\mu\text{m}$ , 230–400 mesh, 55–60  $\text{\AA}$  pore size), using hexane/ethyl acetate (95:5 v/v) as the eluent.

#### 4.1. Characterization Data for deoxygenated products

##### 2,2-diphenylethan-1-ol (2a)

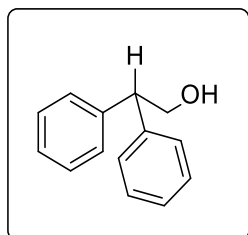

$^1\text{H}$  NMR (400 MHz,  $\text{CDCl}_3$ )  $\delta$  = 7.36 – 7.30 (m, 4H), 7.29 – 7.22 (m, 6H), 4.26 – 4.13 (m, 3H), 1.50 (s, 1H).  $^{13}\text{C}$  NMR (100 MHz,  $\text{CDCl}_3$ )  $\delta$  = 141.50, 128.87, 128.45, 126.97, 66.29, 53.79. IR ( $\text{CH}_2\text{Cl}_2$ ,  $\text{cm}^{-1}$ ) 3358, 3061, 3027, 2933, 2882, 1603, 1493, 1451, 1124, 1055, 741, 698, 632. HRMS (EI) m/z: [M] Calcd for  $\text{C}_{14}\text{H}_{14}\text{O}$ , 198.1045; Found, 198.1042.

##### 2-(4-chlorophenyl)-2-phenylethan-1-ol (2b)

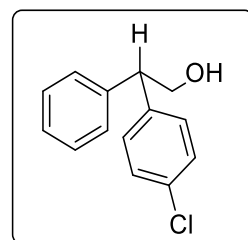

$^1\text{H}$  NMR (400 MHz,  $\text{CDCl}_3$ )  $\delta$  = 7.39 – 7.27 (m, 5H), 7.27 – 7.18 (m, 4H), 4.27 – 4.06 (m, 3H), 1.64 (s, 1H).  $^{13}\text{C}$  NMR (100 MHz,  $\text{CDCl}_3$ )  $\delta$  = 141.04, 140.14, 132.73, 129.80, 128.96, 128.93, 128.37, 127.16, 66.08, 53.05. IR ( $\text{CH}_2\text{Cl}_2$ ,  $\text{cm}^{-1}$ ) 3360, 3061, 3029, 2929, 2886, 1490, 1452, 1407, 1089, 1055, 1015, 821, 751, 699, 624. HRMS (EI) m/z: [M] Calcd for  $\text{C}_{14}\text{H}_{13}\text{ClO}$ , 232.0655; Found, 232.0649.

### 2-(4-fluorophenyl)-2-phenylethan-1-ol (2c)

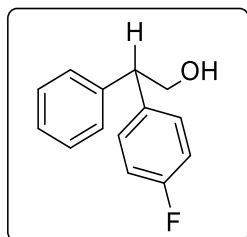

**<sup>1</sup>H NMR** (400 MHz, CDCl<sub>3</sub>) δ = 7.37 (ddd, J=8.8, 6.5, 0.8, 2H), 7.33 – 7.20 (m, 5H), 7.04 (t, J=8.7, 2H), 4.27 – 4.11 (m, 3H), 1.54 (s, 1H). **<sup>13</sup>C NMR** (100 MHz, CDCl<sub>3</sub>) δ = 161.84 (d, *JCF* = 246.4 Hz), 141.32, 137.31 (d, *JCF* = 3.0 Hz), 129.91 (d, *JCF* = 8.1 Hz), 128.95, 128.37, 127.10, 115.65 (d, *JCF* = 21.2 Hz), 66.27, 52.95. **IR** (CH<sub>2</sub>Cl<sub>2</sub>, cm<sup>-1</sup>) 3350, 3061, 3029, 2933, 2886, 1603, 1506, 1224, 1160, 1057, 1021, 830, 753, 699. **HRMS** (ESI) m/z: [M-H]<sup>-</sup> Calcd for C<sub>14</sub>H<sub>12</sub>FO<sup>-</sup>, 215.0877; Found, 215.0873.

### 2-phenyl-2-(p-tolyl)ethan-1-ol (2d)

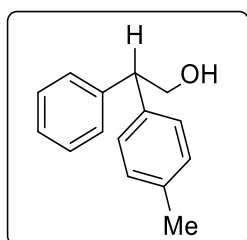

**<sup>1</sup>H NMR** (400 MHz, CDCl<sub>3</sub>) δ = 7.33 (t, J=7.4, 2H), 7.28 (ddd, J=5.3, 4.0, 2.0, 3H), 7.17 (t, J=6.0, 4H), 4.18 (q, J=4.9, 3H), 2.34 (s, 3H), 1.28 (s, 1H). **<sup>13</sup>C NMR** (100 MHz, CDCl<sub>3</sub>) δ = 141.73, 138.43, 136.57, 129.57, 128.83, 128.38, 128.31, 126.88, 66.32, 53.39, 21.14. **IR** (CH<sub>2</sub>Cl<sub>2</sub>, cm<sup>-1</sup>) 3360, 3025, 2923, 2879, 1512, 1452, 1269, 1120, 1058, 1024, 813, 753, 700. **HRMS** (ESI) m/z: [M-H]<sup>-</sup> Calcd for C<sub>15</sub>H<sub>15</sub>O<sup>-</sup>, 211.1128; Found, 211.1130.

### 2-(4-methoxyphenyl)-2-phenylethan-1-ol (2e)

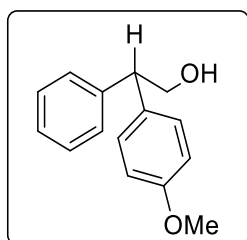

**<sup>1</sup>H NMR** (400 MHz, CDCl<sub>3</sub>) δ = 7.35 – 7.26 (m, 2H), 7.25 – 7.16 (m, 4H), 6.90 – 6.83 (m, 2H), 4.20 – 4.10 (m, 3H), 3.79 (s, 3H), 1.26 (s, 1H). **<sup>13</sup>C NMR** (100 MHz, CDCl<sub>3</sub>) δ = 158.58, 141.84, 133.52, 129.43, 128.85, 128.36, 126.89, 114.28, 66.41, 55.40, 52.95. **IR** (CH<sub>2</sub>Cl<sub>2</sub>, cm<sup>-1</sup>) 3392, 3007, 2926, 2861, 1610, 1512, 1459, 1253, 1179, 1033, 754, 701. **HRMS** (ESI) m/z: [M-H]<sup>-</sup> Calcd for C<sub>15</sub>H<sub>15</sub>O<sub>2</sub><sup>-</sup>, 227.1077; Found, 227.1077.

### 2-(4-((tert-butyldimethylsilyloxy)phenyl)-2-phenylethan-1-ol (2f)

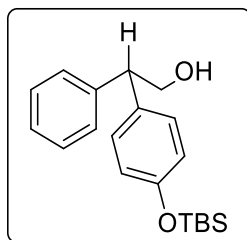

**<sup>1</sup>H NMR** (400 MHz, CDCl<sub>3</sub>) δ = 7.36 – 7.27 (m, 3H), 7.25 – 7.20 (m, 2H), 7.11 (d, J=8.5, 2H), 6.79 (d, J=8.6, 2H), 4.20 – 4.08 (m, 3H), 0.97 (s, 9H), 0.18 (s, 6H). **<sup>13</sup>C NMR** (100 MHz, CDCl<sub>3</sub>) δ = 154.61, 141.86, 133.95, 129.37, 128.82, 128.42, 126.87, 120.33, 66.46, 53.03, 25.80, 18.31, -4.27. **IR** (CH<sub>2</sub>Cl<sub>2</sub>, cm<sup>-1</sup>) 3350, 2950, 2932, 2886, 2858, 1508, 1468, 1258, 1057, 914, 835, 778, 751, 700. **HRMS** (ESI) m/z: [M-H]<sup>-</sup> Calcd for C<sub>20</sub>H<sub>27</sub>O<sub>2</sub>Si<sup>-</sup>, 327.1786; Found, 327.1776.

### 2-([1,1'-biphenyl]-4-yl)-2-phenylethan-1-ol (2g)

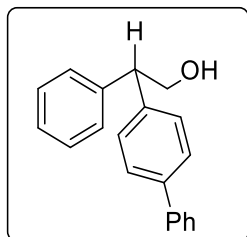

**<sup>1</sup>H NMR** (400 MHz, CDCl<sub>3</sub>) δ = 7.59 – 7.53 (m, 4H), 7.46 – 7.40 (m, 2H), 7.38 – 7.29 (m, 7H), 7.29 – 7.26 (m, 1H), 4.31 – 4.18 (m, 3H), 1.53 (s, 1H). **<sup>13</sup>C NMR** (100 MHz, CDCl<sub>3</sub>) δ = 141.44, 140.90, 140.59, 139.92, 128.94, 128.90, 128.86, 128.47, 127.60, 127.38, 127.18, 127.06, 66.30, 53.49. **IR** (CH<sub>2</sub>Cl<sub>2</sub>, cm<sup>-1</sup>) 3332, 3027, 2926, 2883, 1488, 1270, 1060, 756, 698. **HRMS**

(ESI) m/z: [M-H]<sup>-</sup> Calcd for C<sub>20</sub>H<sub>17</sub>O<sup>-</sup>, 273.1285; Found, 273.1285.

### 2-(2,6-dimethylphenyl)-2-phenylethan-1-ol (2h)

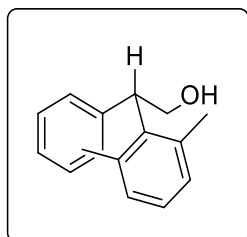

**<sup>1</sup>H NMR** (400 MHz, CDCl<sub>3</sub>) δ = 7.33 – 7.26 (m, 2H), 7.24 – 7.17 (m, 3H), 7.13 (d, J=1.8, 1H), 7.06 (d, J=7.7, 1H), 6.98 (dd, J=7.8, 1.8, 1H), 4.37 (t, J=7.2, 1H), 4.22 – 4.06 (m, 2H), 2.34 (s, 3H), 2.21 (s, 3H), 1.57 (s, 1H). **<sup>13</sup>C NMR** (100 MHz, CDCl<sub>3</sub>) δ = 141.25, 139.06, 135.71, 134.17, 130.97, 128.75, 128.65, 127.55, 127.32, 126.77, 66.21, 49.65, 21.42, 19.47. **IR** (CH<sub>2</sub>Cl<sub>2</sub>, cm<sup>-1</sup>) 3371, 3022, 2929, 2876, 1733, 1496, 1451, 1376, 1263, 1050, 809, 741, 699,

638. **HRMS** (EI) m/z: [M] Calcd for C<sub>16</sub>H<sub>18</sub>O, 226.1358; Found, 226.1359.

### 2-(naphthalen-2-yl)-2-phenylethan-1-ol (2i)

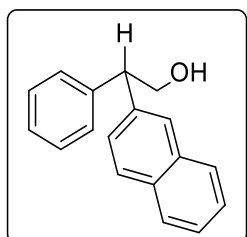

**<sup>1</sup>H NMR** (400 MHz, CDCl<sub>3</sub>) δ = 7.84 – 7.74 (m, 4H), 7.52 – 7.42 (m, 2H), 7.39 – 7.29 (m, 5H), 7.28 – 7.20 (m, 1H), 4.38 (d, J=7.1, 1H), 4.29 (dd, J=7.2, 3.2, 2H), 1.27 (s, 1H). **<sup>13</sup>C NMR** (100 MHz, CDCl<sub>3</sub>) δ = 141.43, 138.96, 133.64, 132.56, 128.90, 128.60, 128.57, 127.92, 127.76, 127.05, 126.99, 126.76, 126.33, 125.91, 66.19, 53.81. **IR** (CH<sub>2</sub>Cl<sub>2</sub>, cm<sup>-1</sup>) 3367, 3050, 3029,

2929, 2883, 1450, 1452, 1266, 1056, 1023, 857, 745, 700, 661. **HRMS** (ESI) m/z: [M-H]<sup>-</sup> Calcd for C<sub>18</sub>H<sub>15</sub>O<sup>-</sup>, 247.1128; Found, 247.1128.

### 2-phenyl-2-(thiophen-2-yl)ethan-1-ol (2j)

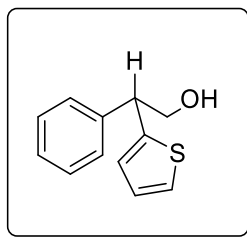

**<sup>1</sup>H NMR** (400 MHz, CDCl<sub>3</sub>) δ = 7.40 – 7.31 (m, 5H), 7.24 (dd, J=5.1, 1.2, 1H), 7.00 (dd, J=5.1, 3.5, 1H), 6.94 (dt, J=3.5, 1.1, 1H), 4.44 (d, J=7.1, 1H), 4.16 (d, J=6.8, 2H), 1.64 (t, J=6.6, 1H). **<sup>13</sup>C NMR** (100 MHz, CDCl<sub>3</sub>) δ = 144.89, 141.08, 128.96, 128.27, 127.44, 126.99, 125.10, 124.47, 67.27, 49.57. **IR** (CH<sub>2</sub>Cl<sub>2</sub>, cm<sup>-1</sup>) 3386, 3018, 2926, 2865, 1267, 1061, 753, 699. **HRMS**

(ESI) m/z: [M-H]<sup>-</sup> Calcd for C<sub>12</sub>H<sub>11</sub>OS<sup>-</sup>, 203.0536; Found, 203.0540.

### 2-phenylpropan-1-ol (2k)

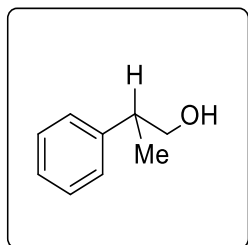

**<sup>1</sup>H NMR** (400 MHz, CDCl<sub>3</sub>) δ = 7.36 – 7.31 (m, 2H), 7.27 – 7.22 (m, 3H), 3.71 (d, J=6.8, 2H), 2.96 (h, J=7.0, 1H), 1.34 (s, 1H), 1.29 (d, J=7.0, 3H). **<sup>13</sup>C NMR** (100 MHz, CDCl<sub>3</sub>) δ = 143.78, 128.79, 127.62, 126.83, 68.86, 42.58, 17.72. **IR** (CH<sub>2</sub>Cl<sub>2</sub>, cm<sup>-1</sup>) 3352, 2961, 2925, 2876, 1493, 1453, 1378, 1267, 1033, 907, 755, 698. **HRMS** (ESI) m/z: [M-H]<sup>-</sup> Calcd for C<sub>9</sub>H<sub>11</sub>O<sup>-</sup>, 135.0815;

Found, 135.0806.

### 4-(1-hydroxypropan-2-yl)phenol (2l)

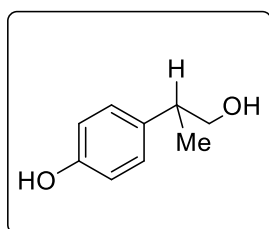

**<sup>1</sup>H NMR** (400 MHz, CDCl<sub>3</sub>) δ = 7.11 (d, J=8.5, 2H), 6.83 – 6.77 (m, 2H), 3.66 (dd, J=6.9, 5.5, 2H), 2.90 (q, J=6.9, 1H), 1.55 (s, 2H), 1.24 (d, J=7.1, 3H). **<sup>13</sup>C NMR** (100 MHz, CD<sub>2</sub>Cl<sub>2</sub>) δ = 154.94, 128.94, 115.67, 69.04, 41.97, 17.97. **IR** (CH<sub>2</sub>Cl<sub>2</sub>, cm<sup>-1</sup>) 3314, 2965, 2922, 2876, 1514, 1452, 1261, 1231, 1177, 1122, 1013, 830, 746, 701. **HRMS** (ESI) m/z: [M-H]<sup>-</sup> Calcd for C<sub>9</sub>H<sub>11</sub>O<sub>2</sub><sup>-</sup>, 151.0764; Found, 151.0756.

### 2-phenylbutan-1-ol (2m)

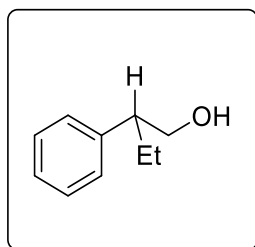

**<sup>1</sup>H NMR** (400 MHz, CDCl<sub>3</sub>) δ = 7.37 – 7.30 (m, 2H), 7.27 – 7.18 (m, 3H), 3.76 (qd, J=10.8, 6.9, 2H), 2.70 (ddd, J=14.1, 8.6, 5.8, 1H), 1.84 – 1.70 (m, 1H), 1.64 – 1.54 (m, 1H), 1.26 (s, 1H), 0.84 (td, J=7.4, 1.3, 3H). **<sup>13</sup>C NMR** (100 MHz, CDCl<sub>3</sub>) δ = 142.38, 128.78, 128.25, 126.86, 67.49, 50.65, 25.13, 12.12. **IR** (CH<sub>2</sub>Cl<sub>2</sub>, cm<sup>-1</sup>) 3342, 2961, 2928, 2874, 1455, 1379, 1269, 1038, 755, 699. **HRMS** (ESI) m/z: [M-H]<sup>-</sup> Calcd for C<sub>10</sub>H<sub>13</sub>O<sup>-</sup>, 149.0972; Found,

149.0968.

### 2,3-diphenylpropan-1-ol (2n)

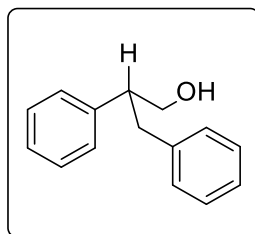

**<sup>1</sup>H NMR** (400 MHz, CDCl<sub>3</sub>) δ = 7.35 – 7.28 (m, 2H), 7.26 – 7.25 (m, 1H), 7.25 – 7.18 (m, 4H), 7.19 – 7.13 (m, 1H), 7.12 – 7.02 (m, 2H), 3.80 (dd, J=6.3, 1.6, 2H), 3.15 – 2.99 (m, 2H), 2.92 (dd, J=13.3, 7.4, 1H), 1.47 (s, 1H). **<sup>13</sup>C NMR** (100 MHz, CDCl<sub>3</sub>) δ = 142.03, 140.05, 129.20, 128.80, 128.40, 128.23, 127.02, 126.18, 66.53, 50.33, 38.85. **IR** (CH<sub>2</sub>Cl<sub>2</sub>, cm<sup>-1</sup>) 3364, 3026,

2922, 2858, 1453, 1267, 1026, 754, 700. **HRMS** (ESI) m/z: [M-H]<sup>-</sup> Calcd for C<sub>15</sub>H<sub>15</sub>O<sup>-</sup>, 211.1128; Found, 211.1121.

### 2-methyl-4-phenylbutan-1-ol (2o)

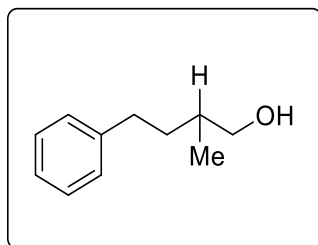

$^1\text{H NMR}$  (400 MHz,  $\text{CD}_2\text{Cl}_2$ )  $\delta$  = 7.29 – 7.23 (m, 2H), 7.22 – 7.11 (m, 3H), 3.53 – 3.38 (m, 2H), 2.70 (ddd,  $J=13.6, 10.2, 5.6$ , 1H), 2.59 (ddd,  $J=13.8, 10.2, 6.3$ , 1H), 1.75 – 1.69 (m, 1H), 1.66 – 1.60 (m, 1H), 1.45 – 1.39 (m, 1H), 0.97 (d,  $J=6.6$ , 3H).  $^{13}\text{C NMR}$  (100 MHz,  $\text{CD}_2\text{Cl}_2$ )  $\delta$  = 143.30, 128.71, 128.64, 125.99, 68.33, 35.86, 35.48, 33.64, 16.64. **IR** ( $\text{CH}_2\text{Cl}_2$ ,  $\text{cm}^{-1}$ ) 3367, 3018, 2928, 2868, 1269, 1036, 754. **HRMS** (ESI)

$m/z$ :  $[\text{M}-\text{H}]^-$  Calcd for  $\text{C}_{11}\text{H}_{15}\text{O}^-$ , 163.1128; Found, 163.1124.

### 2-ethyl-4-phenylbutan-1-ol (2p)

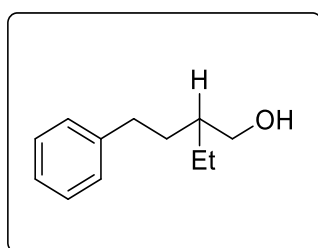

$^1\text{H NMR}$  (400 MHz,  $\text{CDCl}_3$ )  $\delta$  = 7.31 – 7.26 (m, 2H), 7.22 – 7.16 (m, 3H), 3.61 (dd,  $J=5.3, 1.0$ , 2H), 2.65 (t,  $J=8.1$ , 2H), 1.76 – 1.58 (m, 2H), 1.51 – 1.39 (m, 3H), 0.93 (t,  $J=7.4$ , 3H).  $^{13}\text{C NMR}$  (100 MHz,  $\text{CDCl}_3$ )  $\delta$  = 142.86, 128.48, 125.85, 65.23, 41.74, 33.39, 32.53, 23.41, 11.18. **IR** ( $\text{CH}_2\text{Cl}_2$ ,  $\text{cm}^{-1}$ ) 3339, 2965, 2927, 2870, 1456, 1268, 1043, 752, 698.

**HRMS** (ESI)  $m/z$ :  $[\text{M}-\text{H}]^-$  Calcd for  $\text{C}_{12}\text{H}_{17}\text{O}^-$ , 177.1285; Found,

177.1277.

### 2-benzyl-4-phenylbutan-1-ol (2q)

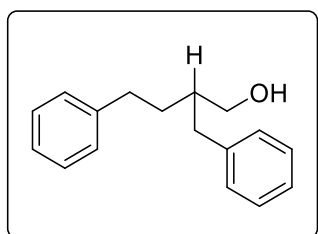

The  $^1\text{H}$  and  $^{13}\text{C}$  NMR spectra are identical to those previously reported.<sup>4</sup>

**IR** 3392, 3026, 2934, 2868, 1494, 1454, 1270, 1035, 914, 753, 700.

**HRMS** (ESI)  $m/z$ :  $[\text{M}-\text{H}]^-$  Calcd for  $\text{C}_{17}\text{H}_{19}\text{O}^-$ , 239.1441; Found, 239.1439.

### 2-phenethylpent-4-en-1-ol (2s)

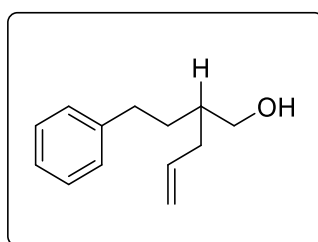

$^1\text{H NMR}$  (400 MHz,  $\text{CDCl}_3$ )  $\delta$  = 7.32 – 7.26 (m, 2H), 7.19 (d,  $J=7.1$ , 3H), 5.82 (ddt,  $J=17.2, 10.2, 7.2$ , 1H), 5.16 – 5.00 (m, 2H), 3.61 (d,  $J=4.9$ , 2H), 2.66 (dd,  $J=8.6, 6.9$ , 2H), 2.23 – 2.15 (m, 2H), 1.74 – 1.60 (m, 3H), 1.44 (s, 1H).  $^{13}\text{C NMR}$  (100 MHz,  $\text{CDCl}_3$ )  $\delta$  = 142.60, 136.93, 128.50, 128.47, 125.91, 116.59, 65.48, 40.05, 35.80, 33.37, 32.60. **IR** ( $\text{CH}_2\text{Cl}_2$ ,  $\text{cm}^{-1}$ ) 3337, 3025, 2923, 2861, 1452, 1269, 1031, 912, 753,

699. **HRMS** (ESI)  $m/z$ :  $[\text{M}-\text{H}]^-$  Calcd for  $\text{C}_{13}\text{H}_{17}\text{O}^-$ , 189.1285; Found, 189.1275.

### 1,1-diphenylpropan-2-ol (2t)

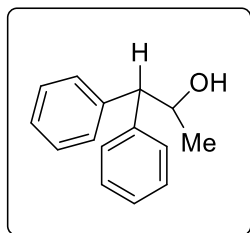

$^1\text{H NMR}$  (400 MHz,  $\text{CDCl}_3$ )  $\delta$  = 7.40 – 7.11 (m, 11H), 4.52 (ddt,  $J=9.4, 6.2, 3.1, 1\text{H}$ ), 3.78 (d,  $J=8.7, 1\text{H}$ ), 1.64 (s, 1H), 1.17 (d,  $J=6.1, 3\text{H}$ ).  $^{13}\text{C NMR}$  (100 MHz,  $\text{CDCl}_3$ )  $\delta$  = 142.62, 141.64, 129.02, 128.78, 128.76, 128.32, 127.06, 126.70, 70.20, 60.75, 21.54. **IR** ( $\text{CH}_2\text{Cl}_2, \text{cm}^{-1}$ ) 3414, 3054, 3022, 2972, 2897, 1493, 1450, 1265, 1119, 1082, 949, 752, 698, 641. **HRMS** (ESI)  $m/z$ :  $[\text{M}-\text{H}]^-$  Calcd for  $\text{C}_{15}\text{H}_{15}\text{O}^-$ , 211.1128; Found, 211.1121.

### 2-phenylcyclohexan-1-ol (2u)

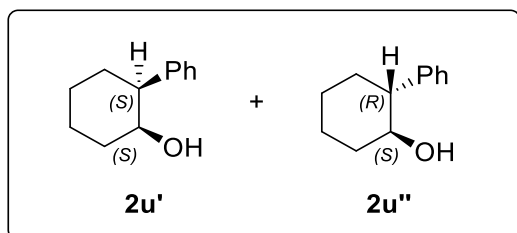

The  $^1\text{H}$  and  $^{13}\text{C}$  NMR data were consistent with those reported in the literature.<sup>5, 6</sup> **IR** ( $\text{CH}_2\text{Cl}_2, \text{cm}^{-1}$ ) 3403, 3022, 2935, 2865, 1445, 1268, 1122, 1059, 997, 754, 700, 642, 609. **HRMS** (ESI)  $m/z$ :  $[\text{M}-\text{H}]^-$  Calcd for  $\text{C}_{12}\text{H}_{15}\text{O}^-$ , 175.1128; Found, 175.1131.

### 3,3-diphenylpropan-1-ol (2v)

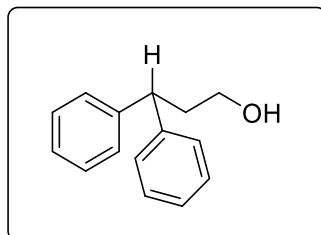

$^1\text{H NMR}$  (400 MHz,  $\text{CDCl}_3$ )  $\delta$  = 7.39 – 7.04 (m, 10H), 4.15 (t,  $J=7.9, 1\text{H}$ ), 3.62 (t,  $J=6.4, 2\text{H}$ ), 2.33 (dt,  $J=7.9, 6.4, 2\text{H}$ ), 1.29 (s, 1H).  $^{13}\text{C NMR}$  (100 MHz,  $\text{CDCl}_3$ )  $\delta$  = 144.61, 128.67, 127.99, 126.42, 61.24, 47.49, 38.35. **IR** ( $\text{CH}_2\text{Cl}_2, \text{cm}^{-1}$ ) 3322, 3057, 3026, 2937, 2876, 1493, 1450, 1268, 1029, 752, 698, 626. **HRMS** (ESI)  $m/z$ :  $[\text{M}-\text{H}]^-$  Calcd for  $\text{C}_{15}\text{H}_{15}\text{O}^-$ , 211.1128; Found, 211.1124.

### 4,4-diphenylbutan-1-ol (2w)

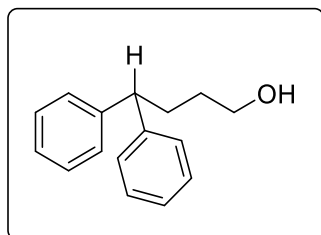

The  $^1\text{H}$  and  $^{13}\text{C}$  NMR spectra are identical to those previously reported.<sup>7</sup> **IR** ( $\text{CH}_2\text{Cl}_2, \text{cm}^{-1}$ ) 3325, 3054, 3022, 2934, 2867, 1493, 1450, 1268, 1053, 924, 752, 699, 628. **HRMS** (ESI)  $m/z$ :  $[\text{M}-\text{H}]^-$  Calcd for  $\text{C}_{16}\text{H}_{17}\text{O}^-$ , 225.1285; Found, 225.1277.

### 3-phenylpropan-1-ol (2x)

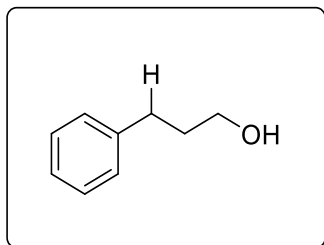

135.0815; Found, 135.0805.

**<sup>1</sup>H NMR** (400 MHz, CDCl<sub>3</sub>) δ = 7.27 (d, J=11.7, 3H), 7.20 (d, J=7.0, 2H), 3.69 (t, J=6.3, 2H), 2.72 (t, J=7.6, 2H), 1.90 (p, J=6.5, 2H), 1.50 (s, 2H). **<sup>13</sup>C NMR** (100 MHz, CDCl<sub>3</sub>) δ = 141.95, 128.58, 128.55, 126.02, 62.47, 34.38, 32.22. **IR** (CH<sub>2</sub>Cl<sub>2</sub>, cm<sup>-1</sup>) 3346, 3007, 2930, 2865, 1455, 1269, 1131, 754, 698. **HRMS** (ESI) m/z: [M-H]<sup>-</sup> Calcd for C<sub>9</sub>H<sub>11</sub>O<sup>-</sup>,

### 1-phenylpropan-1-ol (2x')

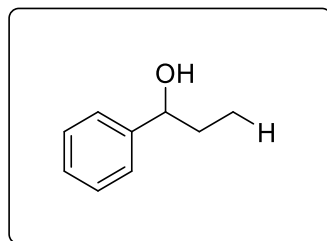

for C<sub>9</sub>H<sub>11</sub>O<sup>-</sup>, 135.0815; Found, 135.0811.

**<sup>1</sup>H NMR** (400 MHz, CDCl<sub>3</sub>) δ = 7.35 (s, 4H), 7.32 – 7.26 (m, 1H), 4.60 (dd, J=7.1, 6.0, 1H), 1.85 – 1.74 (m, 2H), 0.92 (t, J=7.4, 3H). **<sup>13</sup>C NMR** (100 MHz, CDCl<sub>3</sub>) δ = 144.73, 128.55, 127.64, 126.11, 76.18, 32.03, 10.28. **IR** (CH<sub>2</sub>Cl<sub>2</sub>, cm<sup>-1</sup>) 3350, 3036, 2967, 2933, 2868, 1454, 1269, 1093, 1011, 973, 899, 754, 698. **HRMS** (ESI) m/z: [M-H]<sup>-</sup> Calcd

### 1-phenylpropan-2-ol (2y)

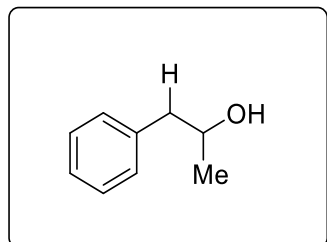

m/z: [M-H]<sup>-</sup> Calcd for C<sub>9</sub>H<sub>11</sub>O<sup>-</sup>, 135.0815; Found, 135.0818.

**<sup>1</sup>H NMR** (400 MHz, CDCl<sub>3</sub>) δ = 7.37 – 7.31 (m, 2H), 7.29 – 7.21 (m, 3H), 4.05 (dq, J=8.0, 6.2, 4.8, 1H), 2.89 – 2.64 (m, 2H), 1.59 (s, 1H), 1.27 (d, J=6.2, 3H). **<sup>13</sup>C NMR** (100 MHz, CDCl<sub>3</sub>) δ = 138.64, 129.53, 128.71, 126.64, 69.03, 45.94, 22.95. **IR** (CH<sub>2</sub>Cl<sub>2</sub>, cm<sup>-1</sup>) 3355, 3022, 2972, 2929, 1454, 1269, 1116, 1080, 940, 839, 752, 699. **HRMS** (ESI)

### 1-(4-methoxyphenyl)propan-2-ol (2z)

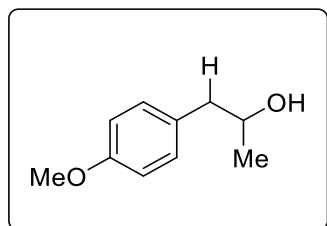

939, 843, 807, 754. **HRMS** (ESI) m/z: [M-H]<sup>-</sup> Calcd for C<sub>10</sub>H<sub>13</sub>O<sub>2</sub><sup>-</sup>, 165.0921; Found, 165.0915.

**<sup>1</sup>H NMR** (400 MHz, CDCl<sub>3</sub>) δ = 7.13 (d, J=8.6, 2H), 6.86 (d, J=8.7, 2H), 3.97 (dq, J=8.0, 6.2, 4.8, 1H), 3.79 (s, 3H), 2.79 – 2.56 (m, 2H), 1.57 (s, 1H), 1.23 (d, J=6.2, 3H). **<sup>13</sup>C NMR** (100 MHz, CDCl<sub>3</sub>) δ = 158.44, 130.60, 130.47, 114.12, 69.08, 55.39, 44.98, 22.82. **IR** (CH<sub>2</sub>Cl<sub>2</sub>, cm<sup>-1</sup>) 3360, 2972, 2933, 2840, 1511, 1244, 1178, 1111, 1077, 1034,

#### 1-(benzo[d][1,3]dioxol-5-yl)propan-1-ol (2aa)

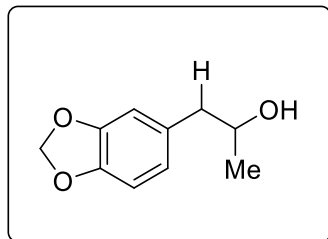

**<sup>1</sup>H NMR** (400 MHz, CDCl<sub>3</sub>) δ = 6.80 – 6.62 (m, 3H), 5.94 (s, 2H), 3.96 (dq, J=8.0, 6.1, 4.6, 1H), 2.77 – 2.54 (m, 2H), 1.55 (s, 1H), 1.23 (d, J=6.1, 3H). **<sup>13</sup>C NMR** (100 MHz, CD<sub>2</sub>Cl<sub>2</sub>) δ = 148.11, 146.54, 133.01, 122.63, 109.99, 108.45, 101.42, 69.20, 45.77, 23.01. **IR** (CH<sub>2</sub>Cl<sub>2</sub>, cm<sup>-1</sup>) 3381, 2968, 2921, 1489, 1442, 1246, 1190, 1098, 1038, 931, 805, 754. **HRMS** (ESI) m/z: [M-H]<sup>-</sup> Calcd for C<sub>10</sub>H<sub>11</sub>O<sub>3</sub><sup>-</sup>, 179.0713; Found, 179.0705.

#### 4-(2-hydroxypropyl)-2-methoxyphenol (2ab)

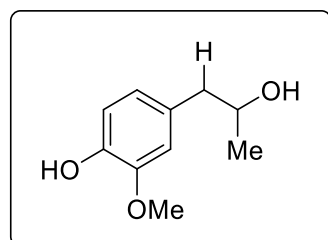

**<sup>1</sup>H NMR** (400 MHz, CDCl<sub>3</sub>) δ = 6.90 – 6.82 (m, 1H), 6.71 (d, J=7.4, 2H), 5.53 (s, 1H), 4.02 – 3.93 (m, 1H), 3.88 (s, 3H), 2.74 (dd, J=13.6, 4.5, 1H), 2.59 (dd, J=13.6, 8.2, 1H), 1.24 (d, J=6.2, 3H). **<sup>13</sup>C NMR** (100 MHz, CDCl<sub>3</sub>) δ = 146.66, 144.44, 130.43, 122.14, 114.58, 111.97, 69.10, 56.03, 45.58, 22.84. **IR** (CH<sub>2</sub>Cl<sub>2</sub>, cm<sup>-1</sup>) 3382, 2972, 2936, 2844, 1516, 1458, 1172, 1269, 1122, 1036, 942, 754. **HRMS** (ESI) m/z: [M-H]<sup>-</sup> Calcd for C<sub>10</sub>H<sub>13</sub>O<sub>3</sub><sup>-</sup>, 181.0870; Found, 181.0862.

#### 1-(benzo[d][1,3]dioxol-5-yl)-4,4-dimethylpentane-2,3-diol (2ac)

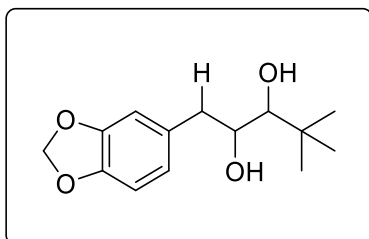

**<sup>1</sup>H NMR** (400 MHz, CDCl<sub>3</sub>) δ = 6.79 – 6.73 (m, 2H), 6.69 (dd, J=7.9, 1.7, 1H), 5.94 (s, 2H), 3.86 (ddd, J=10.3, 4.5, 2.8, 1H), 3.43 (d, J=4.6, 1H), 3.00 (dd, J=13.9, 2.7, 1H), 2.65 (dd, J=13.9, 10.2, 1H), 1.04 (s, 9H). **<sup>13</sup>C NMR** (100 MHz, CDCl<sub>3</sub>) δ = 148.14, 146.52, 132.21, 122.55, 109.88, 108.61, 101.10, 81.50, 73.36, 38.95, 34.50, 26.94. **IR** (CH<sub>2</sub>Cl<sub>2</sub>, cm<sup>-1</sup>) 3427, 2960, 2876, 1490, 1265, 1039, 931, 754. **HRMS** (ESI) m/z: [M-H]<sup>-</sup> Calcd for C<sub>14</sub>H<sub>19</sub>O<sub>4</sub><sup>-</sup>, 251.1289; Found, 251.1291.

## 5. Procedures for the deoxygenative deuteration

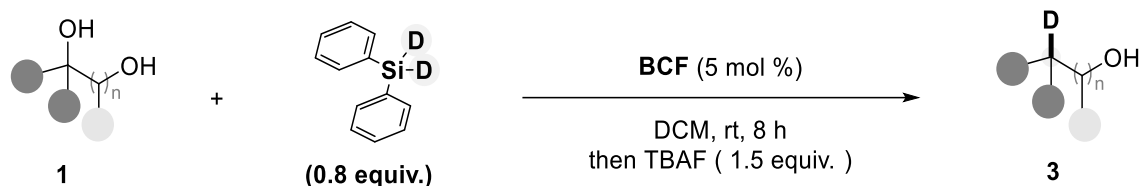

Inside an argon-filled glovebox, diols (0.1 mmol, 1.0 equiv.) and  $B(C_6F_5)_3$  (2.56 mg, 5 mol %) were dissolved in  $CH_2Cl_2$  (0.5 ml) in a 4-ml screw-cap vial equipped with a magnetic stir bar. The deuterated silane was added dropwise to the solution, the vial was then closed and the reaction mixture was stirred for 8 hours before it was quenched with TBAF solution (150  $\mu$ l, 0.15 mmol, 1.5 equiv.). The yield of the corresponding products and remaining starting materials was determined by  $^1H$ -NMR analysis of the crude-reaction mixture using  $CH_2Br_2$  as the analytical standard. Flash column chromatography was performed using a Teledyne ISCO CombiFlash NextGen 300+ automated flash chromatography system equipped with RediSep Bronze normal-phase silica cartridges (4 g, 40–60  $\mu$ m, 230–400 mesh, 55–60  $\text{\AA}$  pore size), using hexane/ethyl acetate (95:5 v/v) as the eluent.

### 5.1. Characterization Data for deuterated products

#### 2,2-diphenylethan-2-d-1-ol (3a)

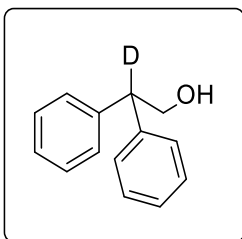

$^1H$  NMR (400 MHz,  $CDCl_3$ )  $\delta$  = 7.37 – 7.30 (m, 4H), 7.29 – 7.20 (m, 6H), 4.18 (s, 2H).  $^{13}C$  NMR (100 MHz,  $CDCl_3$ )  $\delta$  = 141.45, 128.87, 128.43, 126.97, 66.23, 53.70. IR ( $CH_2Cl_2$ ,  $cm^{-1}$ ) 3371, 3061, 3026, 2883, 1607, 1493, 1449, 1266, 1057, 977, 748, 699, 628. HRMS (ESI) m/z:  $[M-H]^-$  Calcd for  $C_{14}H_{12}DO^-$ , 198.1034; Found, 198.1033.

#### 2-(4-fluorophenyl)-2-phenylethan-2-d-1-ol (3c)

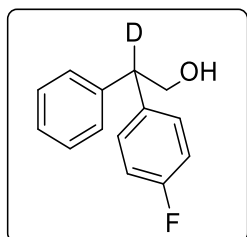

$^1H$  NMR (400 MHz,  $CDCl_3$ )  $\delta$  = 7.37 – 7.30 (m, 2H), 7.28 – 7.19 (m, 5H), 7.01 (t,  $J=8.7$ , 2H), 4.15 (s, 2H).  $^{13}C$  NMR (100 MHz,  $CDCl_3$ )  $\delta$  = 161.84 (d,  $JCF$  = 245.4 Hz), 141.27, 137.25 (d,  $JCF$  = 3.0 Hz), 129.89 (d,  $JCF$  = 8.1 Hz), 128.95, 128.35, 127.11, 115.65 (d,  $JCF$  = 21.2 Hz), 66.22, 52.87. IR ( $CH_2Cl_2$ ,  $cm^{-1}$ ) 3364, 3061, 3025, 2926, 2886, 1603, 1506, 1265, 1224, 1160, 1057, 979, 831, 748, 699. HRMS (EI) m/z:  $[M]$  Calcd for  $C_{14}H_{12}DFO$ , 217.1013; Found, 217.1012.

### 2-phenyl-2-(p-tolyl)ethan-2-d-1-ol (3d)

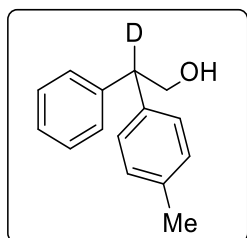

$^1\text{H NMR}$  (400 MHz,  $\text{CDCl}_3$ )  $\delta$  = 7.35 – 7.27 (m, 3H), 7.27 – 7.21 (m, 2H), 7.21 – 7.11 (m, 4H), 4.15 (s, 2H), 2.32 (s, 3H).  $^{13}\text{C NMR}$  (100 MHz,  $\text{CDCl}_3$ )  $\delta$  = 141.67, 138.38, 136.58, 129.58, 128.84, 128.37, 128.29, 126.89, 66.28, 53.32, 21.15. **IR** ( $\text{CH}_2\text{Cl}_2$ ,  $\text{cm}^{-1}$ ) 3358, 3023, 2922, 2876, 1512, 1448, 1268, 1061, 978, 812, 754, 700. **HRMS** (EI)  $m/z$ : [M] Calcd for  $\text{C}_{15}\text{H}_{15}\text{DO}$ , 213.1264; Found, 213.1268.

### 2-(4-methoxyphenyl)-2-phenylethan-2-d-1-ol (3e)

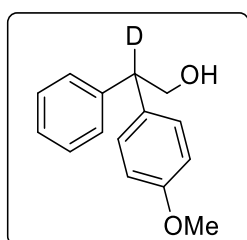

$^1\text{H NMR}$  (400 MHz,  $\text{CDCl}_3$ )  $\delta$  = 7.37 – 7.28 (m, 2H), 7.27 – 7.16 (m, 5H), 6.93 – 6.79 (m, 2H), 4.13 (s, 2H), 3.79 (s, 3H), 1.47 (s, 1H).  $^{13}\text{C NMR}$  (100 MHz,  $\text{CDCl}_3$ )  $\delta$  = 158.57, 141.83, 133.51, 129.43, 129.41, 128.84, 128.35, 126.89, 114.28, 66.34, 55.40, 52.86. **IR** ( $\text{CH}_2\text{Cl}_2$ ,  $\text{cm}^{-1}$ ) 3375, 3025, 2922, 2840, 1614, 1509, 1454, 1246, 1178, 1064, 1031, 825, 752, 700. **HRMS** (ESI)  $m/z$ : [M-H] $^-$  Calcd for  $\text{C}_{15}\text{H}_{14}\text{DO}_2^-$ , 228.1140; Found, 228.1130.

### 2-(4-((tert-butyldimethylsilyloxy)phenyl)-2-phenylethan-2-d-1-ol (3f)

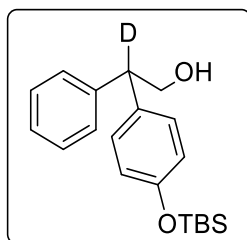

$^1\text{H NMR}$  400 MHz,  $\text{CDCl}_3$ )  $\delta$  = 7.36 – 7.29 (m, 2H), 7.26 – 7.20 (m, 2H), 7.11 (dd,  $J=8.5, 1.6$ , 2H), 6.79 (d,  $J=8.5$ , 2H), 4.14 (s, 2H), 1.44 (s, 1H), 0.97 (s, 9H), 0.18 (s, 6H).  $^{13}\text{C NMR}$  (100 MHz,  $\text{CDCl}_3$ )  $\delta$  = 154.61, 141.86, 133.95, 129.37, 128.82, 128.41, 126.87, 120.33, 66.39, 52.94, 25.80, 18.31, -4.27. **IR** ( $\text{CH}_2\text{Cl}_2$ ,  $\text{cm}^{-1}$ ) 3378, 2954, 2932, 2858, 1610, 1507, 1468, 1258, 1173, 1065, 912, 834, 752, 699. **HRMS** (ESI)  $m/z$ : [M-H] $^-$  Calcd for  $\text{C}_{20}\text{H}_{26}\text{DO}_2\text{Si}^-$ , 328.1848; Found, 328.1840.

### 2-([1,1'-biphenyl]-4-yl)-2-phenylethan-2-d-1-ol (3g)

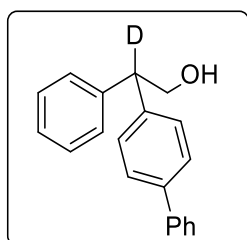

$^1\text{H NMR}$  (400 MHz,  $\text{CDCl}_3$ )  $\delta$  = 7.61 – 7.52 (m, 4H), 7.46 – 7.39 (m, 2H), 7.39 – 7.28 (m, 7H), 7.28 – 7.22 (m, 2H), 4.22 (s, 2H), 1.26 (s, 1H).  $^{13}\text{C NMR}$  (100 MHz,  $\text{CDCl}_3$ )  $\delta$  = 141.40, 140.90, 140.54, 139.92, 128.94, 128.90, 128.83, 128.45, 127.60, 127.38, 127.17, 127.06, 66.24, 53.40. **IR** ( $\text{CH}_2\text{Cl}_2$ ,  $\text{cm}^{-1}$ ) 3343, 3022, 2923, 2861, 1486, 1450, 1265, 1066, 976, 836, 755, 696. **HRMS** (ESI)  $m/z$ : [M-H] $^-$  Calcd for  $\text{C}_{20}\text{H}_{16}\text{DO}^-$ , 274.1347; Found, 274.1348.

### 2-(2,6-dimethylphenyl)-2-phenylethan-2-d-1-ol (3h)

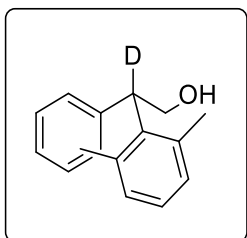

$^1\text{H NMR}$  (400 MHz,  $\text{CDCl}_3$ )  $\delta$  = 7.33 – 7.27 (m, 2H), 7.24 – 7.19 (m, 3H), 7.13 (d,  $J=2.0$ , 1H), 7.06 (d,  $J=7.6$ , 1H), 6.98 (dd,  $J=7.8$ , 2.0, 1H), 4.36 (d,  $J=7.2$ , 1H), 4.14 (d,  $J=6.1$ , 2H), 2.34 (s, 3H), 2.21 (s, 3H).  $^{13}\text{C NMR}$  (100 MHz,  $\text{CDCl}_3$ )  $\delta$  = 141.25, 141.20, 139.07, 139.01, 135.71, 134.16, 130.97, 128.75, 128.65, 128.64, 127.55, 127.32, 126.78, 66.15, 49.58, 21.42, 19.46. **IR** ( $\text{CH}_2\text{Cl}_2$ ,  $\text{cm}^{-1}$ ) 3371, 015, 2921, 2868, 1496, 1450, 1378, 1265, 1064, 810, 749, 699. **HRMS** (ESI)  $m/z$ :  $[\text{M}-\text{H}]^-$  Calcd for  $\text{C}_{16}\text{H}_{16}\text{DO}^-$ , 226.1347; Found, 226.1347.

### 2-(naphthalen-2-yl)-2-phenylethan-2-d-1-ol (3i)

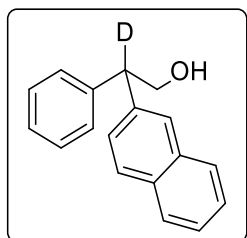

$^1\text{H NMR}$  (400 MHz,  $\text{CDCl}_3$ )  $\delta$  = 7.84 – 7.75 (m, 4H), 7.51 – 7.42 (m, 2H), 7.38 – 7.29 (m, 5H), 7.28 – 7.21 (m, 1H), 4.28 (s, 2H).  $^{13}\text{C NMR}$  (100 MHz,  $\text{CDCl}_3$ )  $\delta$  = 141.38, 138.91, 133.63, 132.55, 128.89, 128.59, 128.54, 127.91, 127.75, 127.04, 126.99, 126.96, 126.74, 126.32, 125.90, 66.11, 53.71. **IR** ( $\text{CH}_2\text{Cl}_2$ ,  $\text{cm}^{-1}$ ) 3357, 3053, 3022, 2926, 2879, 1497, 1268, 1063, 896, 855, 818, 752, 701. **HRMS** (EI)  $m/z$ :  $[\text{M}-\text{H}]^-$  Calcd for  $\text{C}_{18}\text{H}_{15}\text{DO}$ , 249.1264; Found, 249.1260.

### 2-phenylpropan-2-d-1-ol (3k)

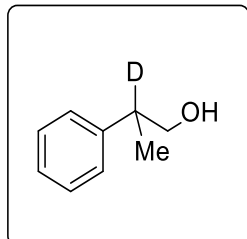

$^1\text{H NMR}$  (400 MHz,  $\text{CDCl}_3$ )  $\delta$  = 7.36 – 7.31 (m, 2H), 7.26 – 7.21 (m, 3H), 3.71 (s, 2H), 1.42 (d,  $J=6.4$ , 1H), 1.28 (s, 3H).  $^{13}\text{C NMR}$  (100 MHz,  $\text{CDCl}_3$ )  $\delta$  = 143.74, 128.80, 127.62, 126.84, 68.80, 42.14, 17.62. **IR** ( $\text{CH}_2\text{Cl}_2$ ,  $\text{cm}^{-1}$ ) 3354, 3029, 2965, 2927, 2872, 1603, 1494, 1451, 1270, 1033, 754, 699. **HRMS** (ESI)  $m/z$ :  $[\text{M}-\text{H}]^-$  Calcd for  $\text{C}_9\text{H}_{10}\text{DO}^-$ , 136.0878; Found, 136.0876

### 2-phenylbutan-2-d-1-ol (3m)

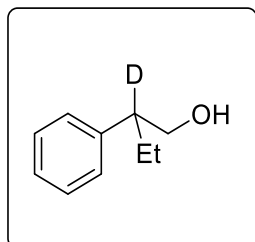

$^1\text{H NMR}$  (400 MHz,  $\text{CDCl}_3$ )  $\delta$  = 7.34 (dd,  $J=8.1$ , 6.7, 2H), 7.27 – 7.15 (m, 3H), 3.75 (q,  $J=10.8$ , 2H), 1.75 (dq,  $J=14.5$ , 7.6, 1H), 1.58 (dddd,  $J=13.1$ , 8.7, 7.4, 5.8, 1H), 1.39 (s, 1H), 0.84 (t,  $J=7.4$ , 3H).  $^{13}\text{C NMR}$  (100 MHz,  $\text{CDCl}_3$ )  $\delta$  = 143.30, 128.55, 127.19, 125.75, 70.61, 31.28, 29.86, 7.54. **IR** ( $\text{CH}_2\text{Cl}_2$ ,  $\text{cm}^{-1}$ ) 3350, 3022, 2962, 2927, 2872, 1454, 1268, 1046, 754, 700. **HRMS** (ESI)  $m/z$ :  $[\text{M}-\text{H}]^-$  Calcd for  $\text{C}_{10}\text{H}_{12}\text{DO}^-$ , 150.1034; Found, 150.1034

### 2,3-diphenylpropan-2-d-1-ol (3n)

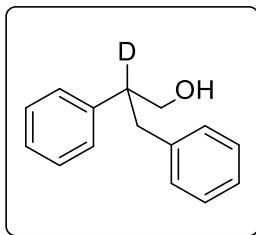

The  $^1\text{H}$  and  $^{13}\text{C}$  NMR spectra are identical to those previously reported.<sup>8</sup> **IR** ( $\text{CH}_2\text{Cl}_2$ ,  $\text{cm}^{-1}$ ) 3358, 3061, 3026, 2923, 2868, 1494, 1450, 1266, 1061, 1029, 752, 697. **HRMS** (ESI)  $m/z$ :  $[\text{M}-\text{H}]^-$  Calcd for  $\text{C}_{15}\text{H}_{14}\text{DO}^-$ , 212.1191; Found, 212.1199.

### 1-(4-methoxyphenyl)propan-1-d-2-ol (3z)

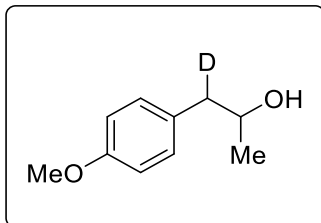

$^1\text{H}$  NMR (400 MHz,  $\text{CDCl}_3$ )  $\delta$  = 7.13 (d,  $J=8.6$ , 2H), 6.86 (d,  $J=8.6$ , 2H), 4.03 – 3.89 (m, 1H), 3.80 (s, 3H), 2.82 – 2.45 (m, 1H), 1.50 (s, 1H), 1.23 (d,  $J=6.2$ , 3H).  $^{13}\text{C}$  NMR (100 MHz,  $\text{CDCl}_3$ )  $\delta$  = 158.46, 130.48, 114.15, 69.06, 55.41, 44.62, 44.43, 22.82. **IR** ( $\text{CH}_2\text{Cl}_2$ ,  $\text{cm}^{-1}$ ) 3382, 2967, 2908, 2833, 1612, 1512, 1459, 1244, 1178, 1110, 1035, 808, 754. **HRMS** (ESI)  $m/z$ :  $[\text{M}-\text{H}]^-$  Calcd for  $\text{C}_{10}\text{H}_{12}\text{DO}_2^-$ , 166.0984; Found, 166.0986.

### 2-(4-methoxyphenyl)ethan-2-d-1-ol (3ad)

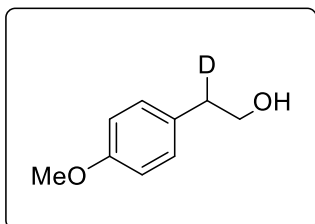

$^1\text{H}$  NMR (400 MHz,  $\text{CDCl}_3$ )  $\delta$  = 7.17 – 7.14 (m, 2H), 6.86 (d,  $J=8.6$ , 2H), 3.83 – 3.81 (m, 2H), 3.80 (s, 3H), 2.81 (d,  $J=6.1$ , 1H).  $^{13}\text{C}$  NMR (100 MHz,  $\text{CDCl}_3$ )  $\delta$  = 158.45, 130.49, 130.11, 114.19, 63.94, 55.42, 38.05. **IR** ( $\text{CH}_2\text{Cl}_2$ ,  $\text{cm}^{-1}$ ) 3346, 3004, 2929, 2836, 1612, 1511, 1462, 1244, 1178, 1031, 810, 754. **HRMS** (ESI)  $m/z$ :  $[\text{M}-\text{H}]^-$  Calcd for  $\text{C}_9\text{H}_{10}\text{DO}_2^-$ , 152.0827; Found, 152.0818.

### 3,3-diphenylpropan-3-d-1-ol (3v)

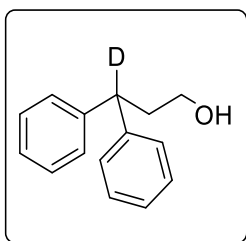

$^1\text{H}$  NMR (400 MHz,  $\text{CDCl}_3$ )  $\delta$  = 7.32 – 7.23 (m, 8H), 7.19 (td,  $J=6.4$ , 2.6, 2H), 3.62 (t,  $J=6.4$ , 2H), 2.32 (t,  $J=6.4$ , 2H), 1.26 (s, 1H).  $^{13}\text{C}$  NMR (100 MHz,  $\text{CDCl}_3$ )  $\delta$  = 144.57, 128.68, 127.97, 126.43, 61.23, 47.07, 38.27. **IR** ( $\text{CH}_2\text{Cl}_2$ ,  $\text{cm}^{-1}$ ) 3327, 3057, 3025, 2934, 2876, 1492, 1446, 1265, 1036, 887, 749, 697. **HRMS** (ESI)  $m/z$ :  $[\text{M}-\text{H}]^-$  Calcd for  $\text{C}_{15}\text{H}_{14}\text{DO}^-$ , 212.1191; Found, 212.1187.

## 6. Racemization Study

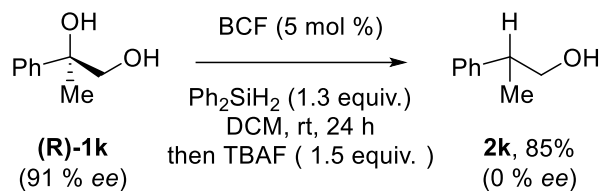

Inside an argon-filled glovebox, chiral substrate **(R)-1k** (0.1 mmol, 1.0 equiv.) and  $\text{B}(\text{C}_6\text{F}_5)_3$  (2.56 mg, 5 mol %) were dissolved in  $\text{CH}_2\text{Cl}_2$  (0.5 ml) in a 4-ml screw-cap vial equipped with a magnetic stir bar. The silane was added dropwise to the solution, the vial was then closed and the reaction mixture was stirred for 24 hours before it was quenched with TBAF solution (150  $\mu\text{l}$ , 0.15 mmol, 1.5 equiv.). The yield of the corresponding products **2k** and remaining starting materials was determined by  $^1\text{H-NMR}$  analysis of the crude-reaction mixture using  $\text{CH}_2\text{Br}_2$  as the analytical standard.

### 6.1. Chiral HPLC analysis of starting material(1k)

Chiral assay was conducted on Chiralpak  $\text{IG}$  column using IPA:n-Hex (10:90) as an eluent (1 mL/min).

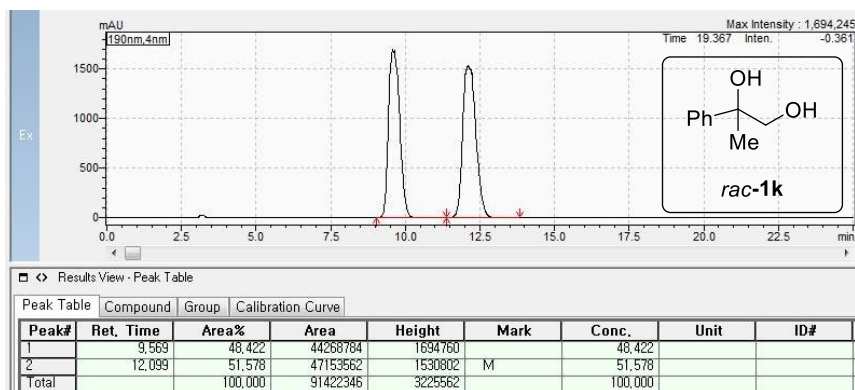

**Figure S1.** Chiral HPLC chromatographic data of Racemic **1k**

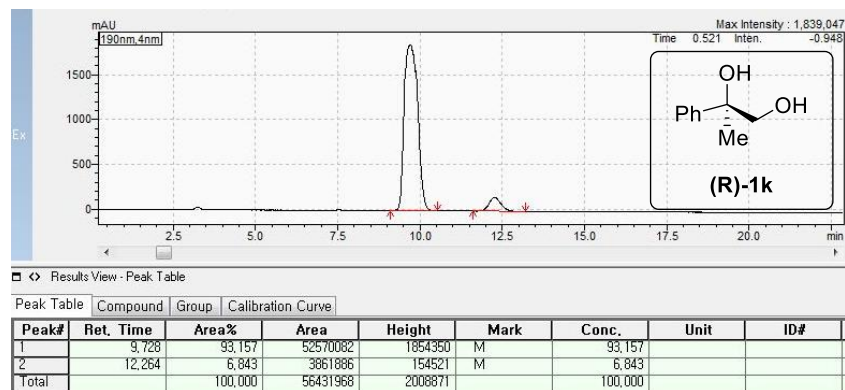

**Figure S2.** Chiral HPLC chromatographic data of Enantio-rich **(R)-1k** (R/S = 93:7)

## 6.2. Chiral HPLC analysis of product(2k)

Chiral assay was conducted on Chiralpak ® IA column using IPA:n-Hex (1:99) as an eluent (1 mL/min).

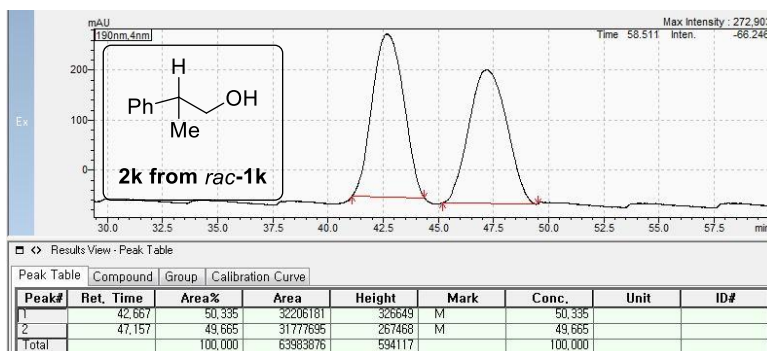

Figure S3. Chiral HPLC chromatographic data of **2k** obtained from *rac*-**1k**

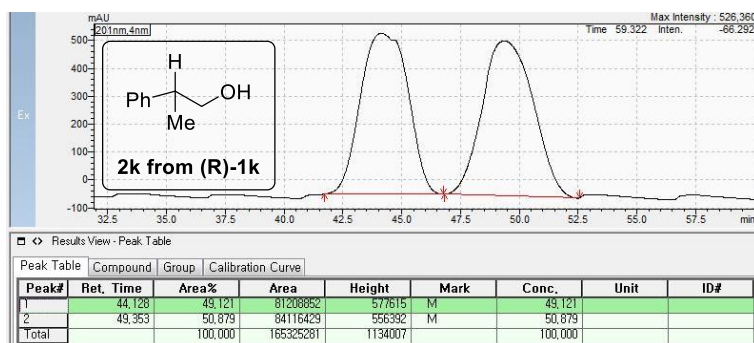

Figure S4. Chiral HPLC chromatographic data of **2k** obtained from (**R**)-**1k**

The stereochemical stability of the benzylic center during the BCF-catalyzed deoxygenation was examined using both racemic(*rac*-**1k**) and enantiopure substrates((**R**)-**1k**) (Fig. S1 and Fig. S2). When enantiopure (**R**)-**1k** (91% ee) was subjected to the standard conditions, the product **2k** was obtained in 85 % yield as a racemic mixture, indicating complete loss of enantiomeric excess. The chiral HPLC chromatogram of **2k** obtained from (**R**)-**1k** was identical to that of **2k** obtained from *rac*-**1k** (Fig. S3 and Fig. S4), confirming that full racemization occurred during the transformation. These results suggest that the BCF-catalyzed deoxygenation proceeds via a carbocationic intermediate that allows for enantiomeric equilibration before hydride delivery. Such behavior contrasts with the stereoretentive pathway observed in less stabilized systems and supports the involvement of a partially dissociative,  $S_N1$ -type mechanism for this benzylic substrate.

## 7. Hammett analysis

### 7.1. General Experimental Procedures

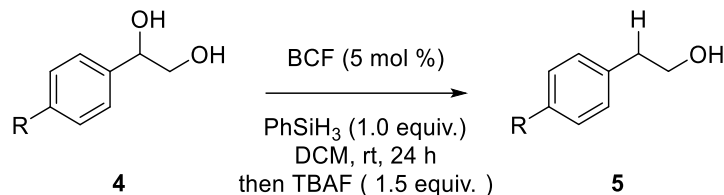

Inside an argon-filled glovebox, substrate **4** (0.1 mmol, 1.0 equiv.) and B(C<sub>6</sub>F<sub>5</sub>)<sub>3</sub> (2.56 mg, 0.005mmol, 0.05equiv.) were dissolved in CH<sub>2</sub>Cl<sub>2</sub> (0.5 ml) in a 4-ml screw-cap vial equipped with a magnetic stir bar. The silane was added dropwise to the solution, the vial was then closed and the reaction mixture was stirred for another 24h before it was quenched with TBAF solution (150  $\mu$ l, 0.15 mmol, 1.5 equiv.). The yield of the corresponding products **5** and remaining starting materials was determined by <sup>1</sup>H-NMR analysis of the crude-reaction mixture using CH<sub>2</sub>Br<sub>2</sub> as the analytical standard.

The conversions of the corresponding para-substituted aryl diols were determined by <sup>1</sup>H NMR analysis of the crude mixtures using CH<sub>2</sub>Br<sub>2</sub> as an internal standard. The relative rate ratios ( $k_X/k_H$ ) were calculated from the conversion ratios of the corresponding deoxygenated products ( $5_X/5_H$ ) obtained under identical reaction conditions. Plotting  $\log(k_X/k_H)$  against the  $\sigma^+$  constants of the substituents afforded a linear correlation ( $\rho = -0.31$ ,  $R^2 = 0.946$ ),<sup>9</sup> indicating a modest negative  $\rho$  value consistent with a slight accumulation of positive charge at the benzylic position in the rate-determining step (Table S9).

| Entry | R               | 4x | 5x, yield <sup>a</sup> | $\sigma^+$ | $k_X/k_H$ | $\log(k_X/k_H)$ |
|-------|-----------------|----|------------------------|------------|-----------|-----------------|
| 1     | OMe             | 4a | 5a, 66%                | -0.778     | 1.98      | +0.2968         |
| 2     | Me              | 4b | 5b, 46%                | -0.311     | 1.13      | +0.0535         |
| 3     | H               | 4c | 5c, 42%                | 0.00       | 1.00      | 0.0000          |
| 4     | Cl              | 4d | 5d, 40%                | +0.114     | 0.94      | -0.0279         |
| 5     | CF <sub>3</sub> | 4e | 5e, 32%                | +0.612     | 0.708     | -0.1500         |

**Table S9.** Hammett  $\sigma^+$  parameters for *para*-substituted aryl diols and the relative rate ratios ( $k_X/k_H$ ) in the B(C<sub>6</sub>F<sub>5</sub>)<sub>3</sub>-catalyzed deoxygenation reaction. <sup>a</sup>Yield was determined by <sup>1</sup>H NMR using CH<sub>2</sub>Br<sub>2</sub> as the internal standard. Hammett  $\sigma^+$  values were taken from the literature.<sup>9</sup>

## 7.2. Hammett plot

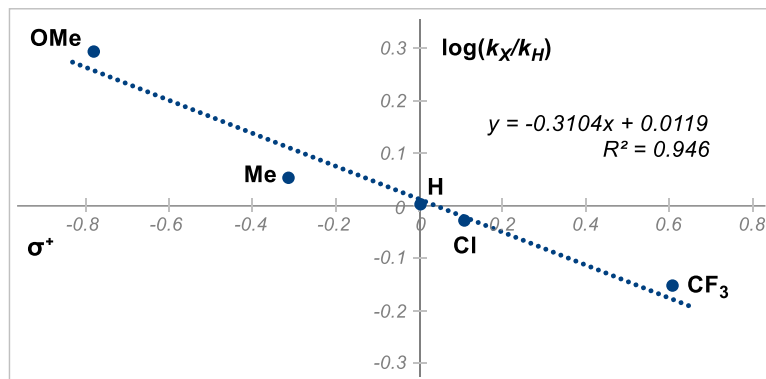

**Figure S5.** Hammett plot of  $\log(k_x/k_H)$  versus  $\sigma^+$  constants for para-substituted aryl diols.

## 7.3. Substrates Used in the Hammett Study Characterization

Spectral data for the substrates and products used in the Hammett study are available in the previously reported work: **4a**,<sup>10</sup> **4b**,<sup>11</sup> **4c**,<sup>12</sup> **4d**,<sup>11</sup> **4e**,<sup>13</sup> **5a**,<sup>14</sup> **5b**,<sup>15</sup> **5c**,<sup>16</sup> **5d**,<sup>17</sup> **5e**.<sup>17</sup>

## 8. Crystallography Information

Crystallographic data of **2g** (CCDC 2501997)

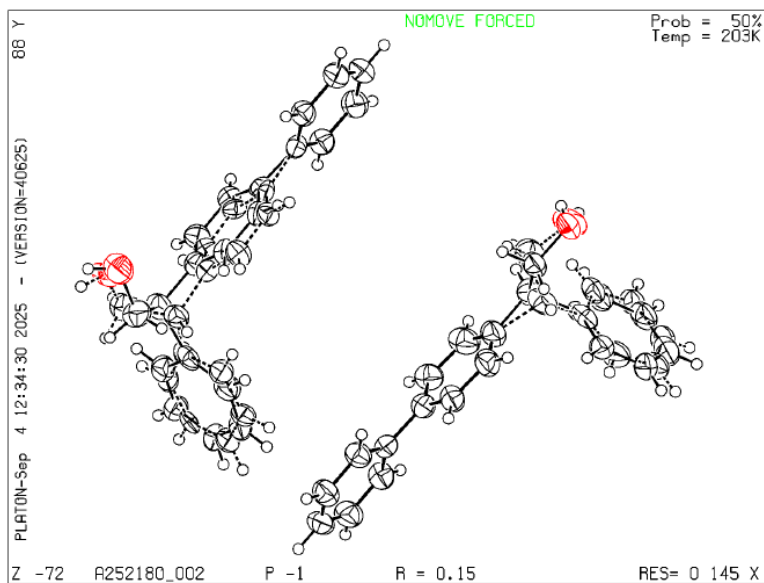

|                                   |                                                            |                            |
|-----------------------------------|------------------------------------------------------------|----------------------------|
| Empirical formula                 | $C_{20}H_{18}O$                                            |                            |
| Formula weight                    | 274.34                                                     |                            |
| Temperature                       | 203(2) K                                                   |                            |
| Wavelength                        | 0.71073 Å                                                  |                            |
| Crystal system                    | Triclinic                                                  |                            |
| Space group                       | $P-1$                                                      |                            |
| Unit cell dimensions              | $a = 6.0056(4)$ Å                                          | $\alpha = 92.939(4)^\circ$ |
|                                   | $b = 15.2590(10)$ Å                                        | $\beta = 94.439(4)^\circ$  |
|                                   | $c = 16.5611(10)$ Å                                        | $\gamma = 98.901(4)^\circ$ |
| Volume                            | $1491.79(17)$ Å <sup>3</sup>                               |                            |
| Z                                 | 4                                                          |                            |
| Density (calculated)              | 1.222 Mg/m <sup>3</sup>                                    |                            |
| Absorption coefficient            | 0.073 mm <sup>-1</sup>                                     |                            |
| F(000)                            | 584                                                        |                            |
| Crystal size                      | 0.141 x 0.056 x 0.018 mm <sup>3</sup>                      |                            |
| Theta range for data collection   | 2.472 to 25.189°.                                          |                            |
| Index ranges                      | $-7 \leq h \leq 7, -18 \leq k \leq 18, -19 \leq l \leq 19$ |                            |
| Reflections collected             | 19887                                                      |                            |
| Independent reflections           | 5264 [R(int) = 0.1192]                                     |                            |
| Completeness to theta = 25.189°   | 97.7 %                                                     |                            |
| Absorption correction             | Semi-empirical from equivalents                            |                            |
| Max. and min. transmission        | 0.7452 and 0.6521                                          |                            |
| Refinement method                 | Full-matrix least-squares on F <sup>2</sup>                |                            |
| Data / restraints / parameters    | 5264 / 918 / 493                                           |                            |
| Goodness-of-fit on F <sup>2</sup> | 1.177                                                      |                            |
| Final R indices [I > 2sigma(I)]   | R1 = 0.1494, wR2 = 0.1711                                  |                            |
| R indices (all data)              | R1 = 0.2874, wR2 = 0.2058                                  |                            |
| Extinction coefficient            | 0.0021(4)                                                  |                            |
| Largest diff. peak and hole       | 0.198 and -0.200 e·Å <sup>-3</sup>                         |                            |

## 9. Computational Data

### 9.1. General details

All calculations were conducted using density functional theory (DFT)<sup>18</sup> implemented in Gaussian 09 suite of program.<sup>19</sup> All molecular structures were optimized by B3LYP-D3 functional<sup>20</sup> with 6-31G\*\* basis set<sup>21</sup>. Vibrational frequency calculations were carried out at the same level of theory as the geometry optimizations, wherein thermochemistry correction energy ( $G - E$ ) was acquired. The single-point calculations of the optimized geometries were performed with B3LYP-D3 functional and the 6-311+G\*\* basis set. The solvent effect was reflected by using the SMD<sup>22</sup> solvation model and carried out at the same level as single-point calculations (solvent = dichloromethane). Finally, to increase the accuracy of the integration grid, we used the int = ultrafine option for all types of calculations. Final solution phase Gibbs free energies ( $G_{\text{Sol}}$ ) were calculated as follows:

$$G_{\text{Sol}} = E_{\text{Sol}} + (G - E) \quad (1)$$

$$\Delta G_{\text{Sol}} = \Sigma G_{\text{Sol}} \text{ for products} - \Sigma G_{\text{Sol}} \text{ for reactants} \quad (2)$$

## 9.2. Potential energy surface for BCF-catalyzed silylative deoxygenation pathway

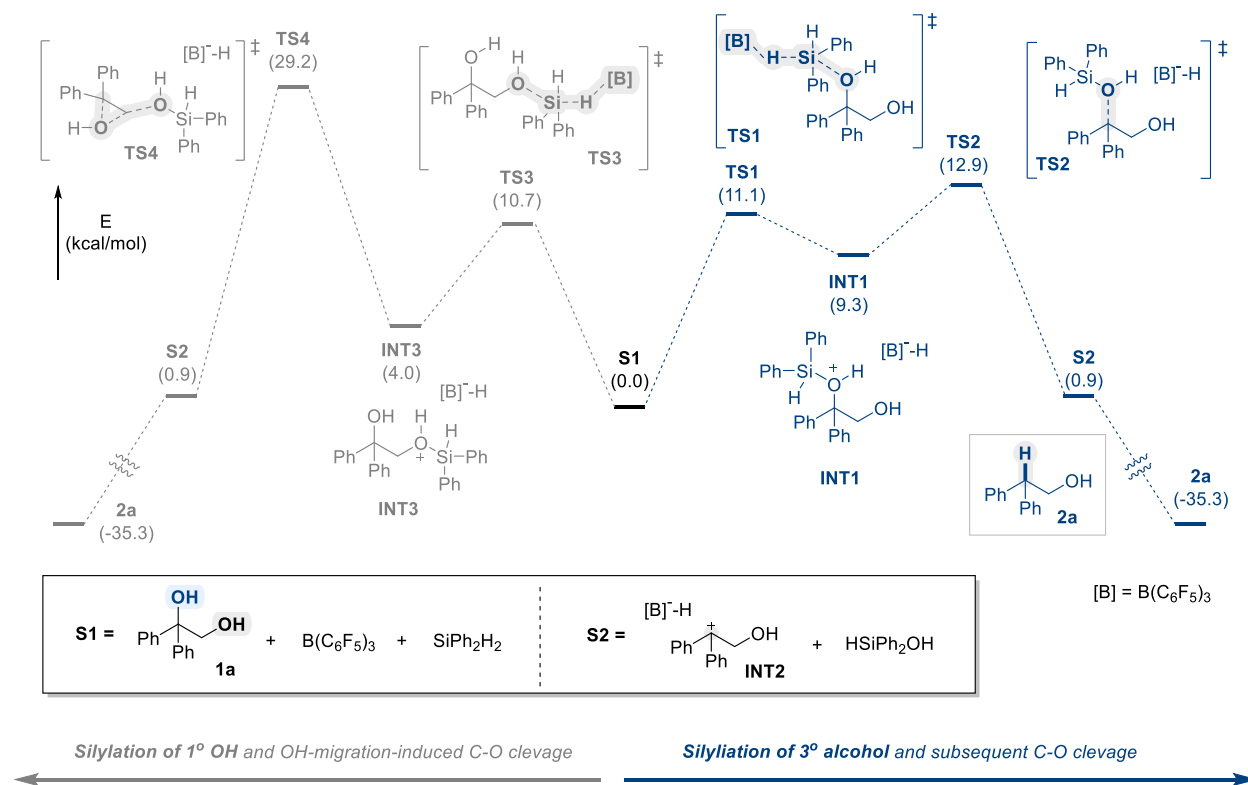

**Figure S6.** Reaction Energy Profiles for Competing Silylation Pathways of 1° vs 3° Alcohol.

DFT calculation was carried out to examine the mechanistic feasibility of the two competing pathways involving the silylation of either the 1° or the 3° alcohol followed by C–O bond cleavage (Fig. S6). For the 3° alcohol silylation pathway, the initial activation barrier corresponding to transition state **TS1** was calculated to be 11.1 kcal/mol, leading to the formation of the silyloxonium intermediate **INT1** ( $\Delta G = 9.3$  kcal/mol). Subsequent cleavage of the C–O bond through **TS2** requires 12.9 kcal/mol, which ultimately delivers the stabilized carbocationic intermediate **S2** (0.9 kcal/mol). This intermediate smoothly collapses to furnish the deoxygenated product **2a**, which is highly exergonic (–35.3 kcal/mol). These results indicate that the silylation of the tertiary hydroxyl group, followed by C–O bond cleavage, is energetically viable and exergonic overall.

In contrast, the pathway initiated by silylation of the 1° alcohol followed by OH-migration and subsequent C–O cleavage features slightly different energetics. The migration-induced transition state **TS3** requires 10.7 kcal/mol to deliver intermediate **INT3** (4.0 kcal/mol), which is stabilized by a hydrogen-bonded network with the silane species. Progression through **TS4**, however, was found to involve a

substantially higher barrier of 29.2 kcal/mol, rendering this pathway less favorable compared to the tertiary OH silylation route.

The comparison clearly demonstrates that although both silylation modes can in principle lead to the same product **2a**, the tertiary OH silylation pathway is strongly preferred. The much lower barrier associated with **TS2** (12.9 kcal/mol) relative to **TS4** (29.2 kcal/mol) explains the predominance of the former route. Thus, the calculations support the mechanistic proposal that regioselectivity in this system is controlled at the initial silylation step, favoring the tertiary OH over the primary OH, which in turn directs the subsequent C–O bond cleavage toward the observed deoxygenated product

### 9.3. Key intermediate Analysis

#### A) NBO charge analysis

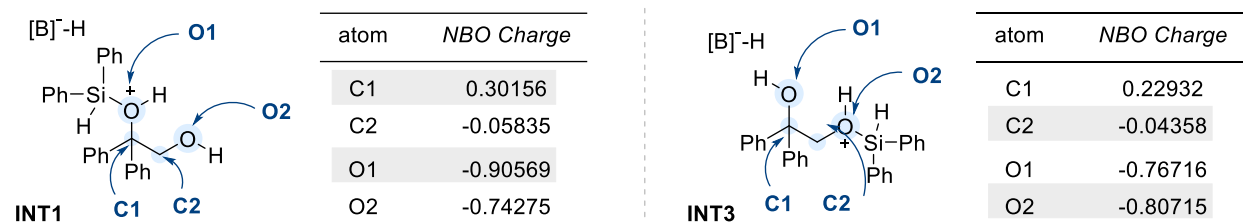

#### B) Bond length analysis

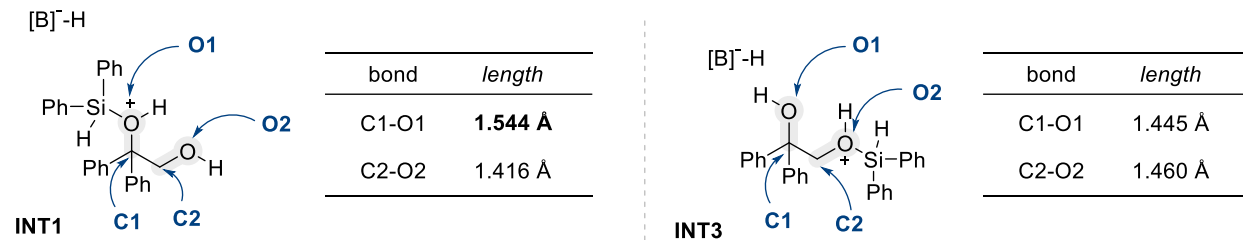

**Figure S7.** Electronic (NBO charge) and Geometric (Bond Length) analysis of **INT1** and **INT3**.

To complement these energetic comparisons, we next examined the electronic and structural features of the silyloxonium intermediates, focusing on the natural bond orbital (NBO) charge distribution and bond metrics at the ionizing C–O bond. The tertiary silyloxonium **INT1** ( $\Delta q = 1.208$ , defined as  $|q_C - q_O|$ ) exhibits markedly greater polarization across the C–O bond than the primary-silylated **INT3** ( $\Delta q = 0.996$ ), indicating stronger predisposition toward heterolysis. Notably, the oxygen atom O1 in **INT1** carries a more negative charge ( $-0.906$ ) compared to O1 in **INT3** ( $-0.767$ ), while the corresponding C1 is more positively charged ( $+0.302$  vs  $+0.229$ ). This enhanced charge separation underscores the heightened electrophilicity of C1 in **INT1**, consistent with its ability to undergo facile ionization.

Bond-length analysis further reinforces this interpretation. The cleaving C1–O1 bond in **INT1** is significantly elongated (1.544 Å) relative to the analogous bond in **INT3** (1.445 Å), reflecting its weakened character and advanced progression toward bond rupture. By contrast, **INT3** shows nearly equivalent C–O distances (1.445 and 1.460 Å), indicating more balanced bonding and the absence of a strongly activated cleavage pathway. The elongation in **INT1** is thus diagnostic of selective destabilization of one specific C–O bond, in line with carbocation-directed reactivity.

Taken together, these electronic and structural features reveal that **INT1** is electronically primed and structurally predisposed to undergo direct heterolysis through **TS2**, leading to tertiary carbocation formation. In contrast, **INT3**, with its lower charge polarization, shorter C–O bond, and symmetric bond distribution, lacks such intrinsic activation, necessitating a higher-energy rearrangement pathway via **TS4** to achieve bond cleavage. These observations provide a mechanistic rationale for the divergent selectivity profiles of the two silyloxonium intermediates.

## 9.4. Energy components of all optimized geometries

**Table S10.** Summarized energy components of DFT-optimized structures

| Optimized Structures                           | $E_{\text{sol}}$ [eV]                       | $G-E$ [eV]                                | $G_{\text{sol}}$ [eV] |
|------------------------------------------------|---------------------------------------------|-------------------------------------------|-----------------------|
|                                                | B3LYP-D3/6-311+G**<br>SMD (dichloromethane) | B3LYP-D3/6-31G**<br>SMD (dichloromethane) |                       |
| <b>1a</b>                                      | -18846.57                                   | 5.616                                     | -18840.953            |
| B(C <sub>6</sub> F <sub>5</sub> ) <sub>3</sub> | -60109.419                                  | 2.557                                     | -60106.861            |
| SiPh <sub>2</sub> H <sub>2</sub>               | -20522.301                                  | 4.343                                     | -20517.958            |
| HSiPh <sub>2</sub> OH                          | -22571.496                                  | 4.484                                     | -22567.011            |
| <b>INT1</b>                                    | -99479.335                                  | 13.968                                    | -99465.368            |
| <b>INT2</b>                                    | -76907.409                                  | 8.687                                     | -76898.722            |
| <b>INT3</b>                                    | -99479.452                                  | 13.855                                    | -99465.597            |
| <b>2a</b>                                      | -16798.947                                  | 5.518                                     | -16793.429            |
| <b>TS1</b>                                     | -99479.119                                  | 13.827                                    | -99465.292            |
| <b>TS2</b>                                     | -99479.092                                  | 13.881                                    | -99465.211            |
| <b>TS3</b>                                     | -99479.118                                  | 13.81                                     | -99465.308            |
| <b>TS4</b>                                     | -99478.437                                  | 13.933                                    | -99464.504            |

## 9.5. Cartesian coordinates and Vibrational frequencies of all optimized geometries

**Table S11.** Cartesian Coordinates of the Optimized Geometries

|                                                  |           |           |           |
|--------------------------------------------------|-----------|-----------|-----------|
| =====                                            |           |           |           |
| <b>1a</b>                                        |           |           |           |
| =====                                            |           |           |           |
| C                                                | 0.677396  | 0.562009  | 1.732806  |
| C                                                | 2.150740  | 0.123297  | 1.808380  |
| O                                                | 2.429624  | -0.215985 | 3.167026  |
| O                                                | 0.518904  | 1.674348  | 2.616223  |
| C                                                | -0.313548 | -0.543328 | 2.123680  |
| C                                                | 0.038166  | -1.889273 | 2.264670  |
| C                                                | -0.928577 | -2.844882 | 2.593341  |
| C                                                | -2.255567 | -2.465250 | 2.787882  |
| C                                                | -2.613133 | -1.119558 | 2.658238  |
| C                                                | -1.649491 | -0.169641 | 2.330427  |
| C                                                | 0.413144  | 1.050363  | 0.307830  |
| C                                                | 0.437510  | 2.416285  | 0.005495  |
| C                                                | 0.250280  | 2.850386  | -1.308588 |
| C                                                | 0.047852  | 1.926426  | -2.334820 |
| C                                                | 0.027388  | 0.561464  | -2.038844 |
| C                                                | 0.204816  | 0.127144  | -0.725559 |
| H                                                | 2.341790  | -0.718642 | 1.128475  |
| H                                                | 2.755334  | 0.976066  | 1.474244  |
| H                                                | 3.382916  | -0.171604 | 3.304929  |
| H                                                | 0.892287  | 1.377448  | 3.459896  |
| H                                                | 1.069812  | -2.200784 | 2.147786  |
| H                                                | -0.637580 | -3.885954 | 2.703091  |
| H                                                | -3.005588 | -3.208558 | 3.043093  |
| H                                                | -3.643886 | -0.812414 | 2.812351  |
| H                                                | -1.917063 | 0.877722  | 2.234249  |
| H                                                | 0.594859  | 3.129080  | 0.806221  |
| H                                                | 0.262308  | 3.914332  | -1.529105 |
| H                                                | -0.097664 | 2.266129  | -3.356400 |
| H                                                | -0.135669 | -0.165955 | -2.829172 |
| H                                                | 0.163539  | -0.933570 | -0.495645 |
| =====                                            |           |           |           |
| <b>B(C<sub>6</sub>F<sub>5</sub>)<sub>3</sub></b> |           |           |           |
| =====                                            |           |           |           |
| B                                                | 0.134878  | 0.763411  | 0.061996  |
| C                                                | 0.209754  | -0.730311 | 0.526992  |
| C                                                | -1.233644 | 1.524510  | 0.091806  |
| C                                                | 1.427879  | 1.495869  | -0.432553 |
| C                                                | -0.835860 | -1.639053 | 0.300088  |
| C                                                | -0.783787 | -2.970193 | 0.697465  |
| C                                                | 0.345023  | -3.436089 | 1.369829  |
| C                                                | 1.407327  | -2.570946 | 1.627527  |
| C                                                | 1.326828  | -1.250920 | 1.199069  |
| C                                                | 2.437273  | 0.833294  | -1.148696 |
| C                                                | 3.587150  | 1.468676  | -1.603216 |
| C                                                | 3.770456  | 2.822929  | -1.327978 |
| C                                                | 2.801417  | 3.524362  | -0.612233 |
| C                                                | 1.656069  | 2.859528  | -0.189479 |
| C                                                | -2.196201 | 1.296644  | 1.087856  |
| C                                                | -3.412363 | 1.968369  | 1.135573  |
| C                                                | -3.713290 | 2.902324  | 0.145366  |
| C                                                | -2.794341 | 3.158578  | -0.871115 |
| C                                                | -1.580855 | 2.480357  | -0.875829 |
| F                                                | 0.408502  | -4.706002 | 1.765387  |
| =====                                            |           |           |           |
| F                                                | -1.944212 | -1.247650 | -0.349461 |
| F                                                | -1.799152 | -3.802109 | 0.444953  |
| F                                                | 2.486611  | -3.016881 | 2.277991  |
| F                                                | 2.376177  | -0.461518 | 1.480552  |
| F                                                | -3.086429 | 4.049567  | -1.823819 |
| F                                                | -4.877106 | 3.548925  | 0.170454  |
| F                                                | -4.291294 | 1.728050  | 2.113608  |
| F                                                | 2.981021  | 4.821307  | -0.342988 |
| F                                                | 4.869846  | 3.445725  | -1.748207 |
| F                                                | 4.513816  | 0.798363  | -2.295168 |
| F                                                | -0.737545 | 2.762189  | -1.882275 |
| F                                                | -1.957175 | 0.413733  | 2.071156  |
| F                                                | 0.760470  | 3.583401  | 0.501427  |
| F                                                | 2.310957  | -0.469537 | -1.448880 |
| =====                                            |           |           |           |
| <b>SiPh<sub>2</sub>H<sub>2</sub></b>             |           |           |           |
| =====                                            |           |           |           |
| Si                                               | 1.129534  | 0.354552  | -1.398613 |
| H                                                | 2.572066  | 0.080621  | -1.654837 |
| H                                                | 0.537511  | 0.839178  | -2.677774 |
| C                                                | 0.343880  | -1.253026 | -0.821887 |
| C                                                | 0.944307  | -2.492926 | -1.104345 |
| C                                                | 0.353790  | -3.690627 | -0.696693 |
| C                                                | -0.851152 | -3.669633 | 0.008444  |
| C                                                | -1.460766 | -2.448553 | 0.305660  |
| C                                                | -0.867389 | -1.254110 | -0.105336 |
| C                                                | 0.885263  | 1.706872  | -0.115666 |
| C                                                | 0.663695  | 3.040141  | -0.504222 |
| C                                                | 0.503377  | 4.051589  | 0.444788  |
| C                                                | 0.557051  | 3.745653  | 1.806072  |
| C                                                | 0.769033  | 2.426601  | 2.213670  |
| C                                                | 0.930334  | 1.419323  | 1.261227  |
| H                                                | 1.887999  | -2.525668 | -1.644223 |
| H                                                | 0.835212  | -4.637825 | -0.924059 |
| H                                                | -1.310700 | -4.600361 | 0.329531  |
| H                                                | -2.395412 | -2.427264 | 0.859434  |
| H                                                | -1.345440 | -0.310564 | 0.146781  |
| H                                                | 0.609377  | 3.293080  | -1.560718 |
| H                                                | 0.331701  | 5.075151  | 0.123083  |
| H                                                | 0.429172  | 4.530689  | 2.546275  |
| H                                                | 0.805531  | 2.183041  | 3.271985  |
| H                                                | 1.079128  | 0.394667  | 1.593320  |
| =====                                            |           |           |           |
| <b>HSiPh<sub>2</sub>OH</b>                       |           |           |           |
| =====                                            |           |           |           |
| O                                                | 2.019253  | 1.984915  | 2.601366  |
| Si                                               | 0.525529  | 1.788186  | 1.872739  |
| H                                                | 2.678932  | 1.313446  | 2.395378  |
| H                                                | -0.305497 | 2.837895  | 2.511697  |
| C                                                | -0.254166 | 0.119083  | 2.223832  |
| C                                                | -0.032913 | -0.995139 | 1.392492  |
| C                                                | -0.588939 | -2.240153 | 1.690810  |
| C                                                | -1.383016 | -2.393947 | 2.829506  |
| C                                                | -1.619725 | -1.300802 | 3.666303  |
| C                                                | -1.059827 | -0.058750 | 3.363863  |
| C                                                | 0.715244  | 2.024371  | 0.020838  |

|   |           |           |           |
|---|-----------|-----------|-----------|
| C | 1.839688  | 2.699281  | -0.488180 |
| C | 1.996984  | 2.906010  | -1.859808 |
| C | 1.026918  | 2.441431  | -2.750628 |
| C | -0.097149 | 1.768162  | -2.266188 |
| C | -0.248282 | 1.561056  | -0.894185 |
| H | 0.568211  | -0.884512 | 0.493016  |
| H | -0.407887 | -3.087507 | 1.035109  |
| H | -1.819433 | -3.361495 | 3.061927  |
| H | -2.241330 | -1.416560 | 4.549925  |
| H | -1.255082 | 0.785341  | 4.021743  |
| H | 2.599180  | 3.061437  | 0.200367  |
| H | 2.873689  | 3.427951  | -2.233710 |
| H | 1.147176  | 2.601151  | -3.818657 |
| H | -0.851757 | 1.401905  | -2.956952 |
| H | -1.120400 | 1.021344  | -0.532702 |

=====  
**INT1**  
=====

|    |           |           |           |
|----|-----------|-----------|-----------|
| C  | -0.763779 | -1.155540 | 0.079298  |
| C  | 0.392916  | -2.166905 | 0.178347  |
| O  | -0.238350 | 0.170256  | 0.672224  |
| O  | 1.584326  | -1.597250 | -0.334056 |
| H  | -0.765254 | 0.974671  | 0.311045  |
| Si | 0.577037  | 0.594884  | 2.214164  |
| H  | -0.503533 | 1.131367  | 3.051460  |
| C  | -1.984015 | -1.533772 | 0.906752  |
| C  | -2.052009 | -2.709817 | 1.665165  |
| C  | -3.178436 | -2.984598 | 2.444818  |
| C  | -4.243990 | -2.085646 | 2.482426  |
| C  | -4.191265 | -0.917174 | 1.718329  |
| C  | -3.074757 | -0.648475 | 0.930478  |
| C  | -1.063186 | -0.854186 | -1.382988 |
| C  | -0.241810 | 0.006797  | -2.120327 |
| C  | -0.533630 | 0.278321  | -3.455451 |
| C  | -1.621117 | -0.335516 | -4.077579 |
| C  | -2.409243 | -1.236119 | -3.360391 |
| C  | -2.135474 | -1.493379 | -2.018228 |
| C  | 1.248659  | -0.963311 | 2.970156  |
| C  | 2.580303  | -1.363931 | 2.745670  |
| C  | 3.060553  | -2.563623 | 3.271492  |
| C  | 2.220892  | -3.371508 | 4.044833  |
| C  | 0.908545  | -2.970435 | 4.306428  |
| C  | 0.427325  | -1.772072 | 3.776874  |
| C  | 1.874818  | 1.799693  | 1.694460  |
| C  | 2.677865  | 1.536910  | 0.566269  |
| C  | 3.711613  | 2.405080  | 0.219921  |
| C  | 3.955527  | 3.544276  | 0.991110  |
| C  | 3.163166  | 3.818286  | 2.107275  |
| C  | 2.125987  | 2.953769  | 2.458006  |
| H  | 0.535355  | -2.489220 | 1.209509  |
| H  | 0.076075  | -3.036434 | -0.414290 |
| H  | 2.320662  | -1.978521 | 0.159289  |
| H  | -1.238817 | -3.425848 | 1.663302  |
| H  | -3.215930 | -3.902245 | 3.024409  |
| H  | -5.113832 | -2.295234 | 3.097735  |
| H  | -5.012727 | -0.209931 | 1.734057  |
| H  | -3.065156 | 0.243762  | 0.317466  |
| H  | 0.598842  | 0.492307  | -1.646618 |
| H  | 0.087549  | 0.981100  | -4.001934 |
| H  | -1.857733 | -0.109807 | -5.112844 |
| H  | -3.256911 | -1.719365 | -3.836303 |

|   |           |           |           |
|---|-----------|-----------|-----------|
| H | -2.774948 | -2.167987 | -1.459427 |
| H | 3.241970  | -0.726563 | 2.164503  |
| H | 4.088742  | -2.863808 | 3.091036  |
| H | 2.594558  | -4.305352 | 4.454708  |
| H | 0.261687  | -3.589537 | 4.920943  |
| H | -0.600332 | -1.479130 | 3.973384  |
| H | 2.479401  | 0.660665  | -0.044399 |
| H | 4.309333  | 2.209966  | -0.664739 |
| H | 4.742821  | 4.234541  | 0.703887  |
| H | 3.337687  | 4.717008  | 2.690812  |
| H | 1.496552  | 3.194362  | 3.308039  |
| C | -2.665047 | 3.021667  | 1.749704  |
| B | -1.901608 | 3.191717  | 0.311814  |
| C | -0.621707 | 4.198838  | 0.250949  |
| C | -2.880500 | 3.546269  | -0.950022 |
| C | -2.072408 | 3.243646  | 2.995700  |
| C | -3.959437 | 2.500289  | 1.835234  |
| C | -2.697456 | 3.012683  | 4.218988  |
| C | -4.627204 | 2.250112  | 3.031680  |
| C | -3.995040 | 2.512407  | 4.241126  |
| F | -0.781073 | 3.646396  | 3.081948  |
| F | -4.628342 | 2.126247  | 0.718445  |
| F | -2.046762 | 3.237080  | 5.371657  |
| F | -5.856980 | 1.703753  | 3.020747  |
| F | -4.611254 | 2.261287  | 5.403393  |
| C | 0.432683  | 3.927168  | -0.620972 |
| C | -0.513268 | 5.411972  | 0.934281  |
| C | 1.527400  | 4.765412  | -0.803648 |
| C | 0.576542  | 6.270381  | 0.804683  |
| C | 1.607726  | 5.942388  | -0.070182 |
| F | 0.432577  | 2.783563  | -1.352132 |
| F | -1.483959 | 5.807642  | 1.778842  |
| F | 2.521136  | 4.432552  | -1.646813 |
| F | 0.644549  | 7.408220  | 1.514464  |
| F | 2.680545  | 6.739389  | -0.189384 |
| C | -3.286293 | 2.584195  | -1.872259 |
| C | -3.313276 | 4.841792  | -1.238041 |
| C | -4.014126 | 2.862751  | -3.024753 |
| C | -4.056172 | 5.172036  | -2.371415 |
| C | -4.403597 | 4.174497  | -3.277990 |
| F | -2.986758 | 1.282149  | -1.668111 |
| F | -3.014628 | 5.857900  | -0.403097 |
| F | -4.346373 | 1.881399  | -3.881564 |
| F | -4.436953 | 6.439095  | -2.597392 |
| F | -5.111068 | 4.472453  | -4.376781 |
| H | -1.467230 | 2.054790  | 0.054844  |

=====  
**INT2**  
=====

|   |           |           |           |
|---|-----------|-----------|-----------|
| C | -0.270626 | -0.468845 | -0.404345 |
| C | -0.157051 | -0.122972 | -1.881138 |
| O | -0.841843 | 1.123947  | -2.018292 |
| C | -1.482741 | -1.064900 | 0.051826  |
| C | -2.671370 | -1.007589 | -0.736531 |
| C | -3.792762 | -1.717299 | -0.354916 |
| C | -3.758392 | -2.530478 | 0.793659  |
| C | -2.607879 | -2.605104 | 1.580320  |
| C | -1.479832 | -1.880155 | 1.221371  |
| C | 0.813544  | -0.148393 | 0.479269  |
| C | 2.165276  | -0.265169 | 0.056274  |
| C | 3.200701  | -0.008107 | 0.937943  |

|   |           |           |           |
|---|-----------|-----------|-----------|
| C | 2.920188  | 0.405010  | 2.246005  |
| C | 1.598245  | 0.566390  | 2.673230  |
| C | 0.553216  | 0.280254  | 1.808933  |
| H | 0.896576  | -0.034035 | -2.163512 |
| H | -0.607859 | -0.917627 | -2.482995 |
| H | -0.690950 | 1.446035  | -2.916756 |
| H | -2.695999 | -0.370845 | -1.612361 |
| H | -4.696700 | -1.664788 | -0.952493 |
| H | -4.632441 | -3.118239 | 1.058588  |
| H | -2.555630 | -3.259112 | 2.443175  |
| H | -0.563690 | -2.028462 | 1.776479  |
| H | 2.390822  | -0.664628 | -0.924849 |
| H | 4.228107  | -0.181175 | 0.638379  |
| H | 3.737884  | 0.594079  | 2.934280  |
| H | 1.387706  | 0.907762  | 3.681313  |
| H | -0.472389 | 0.431310  | 2.125203  |
| B | 1.383754  | -4.059857 | 1.169798  |
| C | 2.816490  | -3.986351 | 0.396925  |
| C | 1.449140  | -4.873501 | 2.574791  |
| C | 0.129081  | -4.506022 | 0.211575  |
| C | 3.820728  | -3.180030 | 0.932371  |
| C | 3.134183  | -4.574756 | -0.825655 |
| C | 5.018014  | -2.899071 | 0.281038  |
| C | 4.330145  | -4.342519 | -1.505827 |
| C | 5.279500  | -3.487992 | -0.952354 |
| F | 3.634922  | -2.581162 | 2.132043  |
| F | 2.255852  | -5.400526 | -1.435353 |
| F | 5.902970  | -2.029323 | 0.813771  |
| F | 4.571276  | -4.923254 | -2.692539 |
| F | 6.425652  | -3.229821 | -1.600427 |
| C | 0.616963  | -4.530528 | 3.637859  |
| C | 2.301031  | -5.948266 | 2.824782  |
| C | 0.623996  | -5.170587 | 4.872464  |
| C | 2.352587  | -6.619995 | 4.046026  |
| C | 1.507513  | -6.226723 | 5.079462  |
| F | -0.293751 | -3.523860 | 3.496339  |
| F | 3.126886  | -6.399994 | 1.856958  |
| F | -0.207579 | -4.787867 | 5.857580  |
| F | 3.199255  | -7.644739 | 4.233641  |
| F | 1.538224  | -6.861092 | 6.260722  |
| C | -0.152560 | -3.760789 | -0.934713 |
| C | -0.823560 | -5.488101 | 0.489313  |
| C | -1.284696 | -3.910170 | -1.724807 |
| C | -1.982588 | -5.676193 | -0.269521 |
| C | -2.223345 | -4.876062 | -1.382627 |
| F | 0.693310  | -2.755508 | -1.301294 |
| F | -0.693977 | -6.305390 | 1.552527  |
| F | -1.508928 | -3.097165 | -2.780240 |
| F | -2.878781 | -6.612565 | 0.073673  |
| F | -3.344608 | -5.020914 | -2.103121 |
| H | 1.149967  | -2.900502 | 1.454820  |

=====  
**INT3**  
=====

|    |           |           |          |
|----|-----------|-----------|----------|
| C  | -2.015027 | 0.073808  | 2.341340 |
| C  | -0.587728 | -0.477796 | 2.577848 |
| O  | -2.582397 | -0.767488 | 1.312680 |
| O  | -0.131192 | -0.908558 | 1.259250 |
| Si | 1.544743  | -1.064068 | 0.617017 |
| H  | -0.939654 | -1.282691 | 0.815912 |
| H  | 2.332474  | -1.734613 | 1.649964 |

|   |           |           |           |
|---|-----------|-----------|-----------|
| C | -1.935296 | 1.494649  | 1.772653  |
| C | -1.377138 | 2.513737  | 2.555818  |
| C | -1.251663 | 3.806055  | 2.052305  |
| C | -1.690585 | 4.099322  | 0.758029  |
| C | -2.257672 | 3.091597  | -0.021464 |
| C | -2.380388 | 1.792784  | 0.481890  |
| C | -2.839234 | 0.009338  | 3.622465  |
| C | -2.248935 | -0.148659 | 4.882177  |
| C | -3.046615 | -0.244438 | 6.024974  |
| C | -4.435302 | -0.184075 | 5.918855  |
| C | -5.027954 | -0.009605 | 4.665620  |
| C | -4.235219 | 0.095040  | 3.525714  |
| C | 1.152067  | -2.022211 | -0.915161 |
| C | 1.516164  | -1.543991 | -2.186407 |
| C | 1.237677  | -2.293308 | -3.330304 |
| C | 0.591427  | -3.525978 | -3.215450 |
| C | 0.216800  | -4.009726 | -1.958734 |
| C | 0.494203  | -3.265665 | -0.813678 |
| C | 2.059296  | 0.703134  | 0.425859  |
| C | 3.295908  | 1.130821  | 0.943848  |
| C | 3.690589  | 2.464868  | 0.834359  |
| C | 2.846452  | 3.391168  | 0.218255  |
| C | 1.609394  | 2.985786  | -0.290675 |
| C | 1.220989  | 1.651292  | -0.192386 |
| H | 0.115472  | 0.270926  | 2.933728  |
| H | -0.567239 | -1.355770 | 3.215756  |
| H | -3.111934 | -1.478399 | 1.706787  |
| H | -1.052304 | 2.298290  | 3.570451  |
| H | -0.815308 | 4.584567  | 2.670713  |
| H | -1.597215 | 5.107807  | 0.365874  |
| H | -2.609636 | 3.311536  | -1.025331 |
| H | -2.823024 | 1.011143  | -0.123300 |
| H | -1.171588 | -0.225010 | 4.992033  |
| H | -2.578530 | -0.391012 | 6.993287  |
| H | -5.053818 | -0.283229 | 6.805158  |
| H | -6.108820 | 0.034799  | 4.575553  |
| H | -4.693980 | 0.228601  | 2.550807  |
| H | 2.017221  | -0.584033 | -2.282333 |
| H | 1.525374  | -1.917722 | -4.307851 |
| H | 0.379683  | -4.111152 | -4.105735 |
| H | -0.283805 | -4.969058 | -1.869045 |
| H | 0.198250  | -3.654008 | 0.155884  |
| H | 3.949529  | 0.421345  | 1.445939  |
| H | 4.647423  | 2.782390  | 1.237858  |
| H | 3.148709  | 4.431838  | 0.142162  |
| H | 0.941577  | 3.707661  | -0.749422 |
| H | 0.247459  | 1.357329  | -0.573757 |
| C | 0.872503  | -5.309664 | 2.617263  |
| B | 0.580365  | -3.924133 | 3.425755  |
| C | 1.692588  | -3.612036 | 4.576428  |
| C | -0.963766 | -3.829805 | 3.963268  |
| C | 1.805008  | -5.334257 | 1.580605  |
| C | 0.227092  | -6.524319 | 2.851545  |
| C | 2.058489  | -6.450869 | 0.787564  |
| C | 0.451305  | -7.671666 | 2.092304  |
| C | 1.373358  | -7.633758 | 1.049357  |
| F | 2.513032  | -4.215728 | 1.279499  |
| F | -0.671722 | -6.634019 | 3.851727  |
| F | 2.950200  | -6.399154 | -0.216325 |
| F | -0.207159 | -8.811989 | 2.354859  |
| F | 1.598822  | -8.725984 | 0.304189  |
| C | 2.174283  | -2.326247 | 4.807559  |

|   |           |           |          |
|---|-----------|-----------|----------|
| C | 2.251628  | -4.594611 | 5.396516 |
| C | 3.154206  | -2.013070 | 5.746587 |
| C | 3.234621  | -4.336391 | 6.349215 |
| C | 3.692530  | -3.032359 | 6.524648 |
| F | 1.682905  | -1.262729 | 4.101460 |
| F | 1.830336  | -5.870661 | 5.299791 |
| F | 3.576169  | -0.746048 | 5.909114 |
| F | 3.738535  | -5.322804 | 7.106238 |
| F | 4.635998  | -2.761419 | 7.437779 |
| C | -1.977035 | -3.562230 | 3.047112 |
| C | -1.401776 | -3.915619 | 5.287028 |
| C | -3.305165 | -3.342922 | 3.389526 |
| C | -2.726425 | -3.707502 | 5.677204 |
| C | -3.693154 | -3.414465 | 4.720586 |
| F | -1.681192 | -3.426015 | 1.719452 |
| F | -0.534907 | -4.190843 | 6.278427 |
| F | -4.197020 | -2.962356 | 2.436041 |
| F | -3.076359 | -3.757969 | 6.970882 |
| F | -4.961053 | -3.173862 | 5.077715 |
| H | 0.677067  | -3.042710 | 2.602369 |

=====  
**2a**  
=====

|   |           |           |           |
|---|-----------|-----------|-----------|
| C | 0.782263  | 0.450777  | 1.727600  |
| C | 2.238734  | -0.032821 | 1.708626  |
| O | 2.641363  | -0.345616 | 3.037346  |
| H | 0.746790  | 1.265399  | 2.463369  |
| C | -0.241340 | -0.600621 | 2.154817  |
| C | 0.104853  | -1.899392 | 2.545005  |
| C | -0.881456 | -2.822019 | 2.907109  |
| C | -2.227678 | -2.460795 | 2.892102  |
| C | -2.584465 | -1.163356 | 2.514055  |
| C | -1.600425 | -0.248083 | 2.148212  |
| C | 0.460001  | 1.037083  | 0.356928  |
| C | 0.504848  | 2.419499  | 0.141836  |
| C | 0.263877  | 2.955032  | -1.125341 |
| C | -0.021089 | 2.109946  | -2.198820 |
| C | -0.067077 | 0.728249  | -1.995731 |
| C | 0.169335  | 0.197659  | -0.727924 |
| H | 2.323887  | -0.903433 | 1.037459  |
| H | 2.859778  | 0.769264  | 1.282395  |
| H | 3.565417  | -0.623245 | 3.013670  |
| H | 1.148019  | -2.185297 | 2.603608  |
| H | -0.590587 | -3.825057 | 3.207456  |
| H | -2.992025 | -3.178938 | 3.175314  |
| H | -3.629625 | -0.866538 | 2.500127  |
| H | -1.885014 | 0.754021  | 1.837753  |
| H | 0.727809  | 3.081633  | 0.975242  |
| H | 0.295777  | 4.031152  | -1.271713 |
| H | -0.211203 | 2.523997  | -3.184917 |
| H | -0.293128 | 0.063551  | -2.824924 |
| H | 0.111261  | -0.875251 | -0.567159 |

=====  
**TS1**  
=====

|    |           |           |          |
|----|-----------|-----------|----------|
| C  | -2.034526 | 0.520446  | 2.062057 |
| C  | -0.770239 | -0.050313 | 2.738213 |
| O  | -2.666833 | -0.663744 | 1.524480 |
| O  | -0.010164 | -0.831243 | 1.834159 |
| Si | 2.650927  | -1.550625 | 1.159929 |

|   |           |           |           |
|---|-----------|-----------|-----------|
| H | -0.650758 | -1.363289 | 1.336169  |
| H | 2.340275  | -2.221529 | 2.441175  |
| C | -1.757885 | 1.504803  | 0.922790  |
| C | -0.472202 | 1.896385  | 0.535907  |
| C | -0.293569 | 2.775264  | -0.536024 |
| C | -1.392738 | 3.272747  | -1.235483 |
| C | -2.682024 | 2.899660  | -0.846882 |
| C | -2.859906 | 2.030707  | 0.228089  |
| C | -2.903509 | 1.167234  | 3.142493  |
| C | -3.993675 | 0.484398  | 3.689922  |
| C | -4.746589 | 1.063412  | 4.714187  |
| C | -4.409901 | 2.324227  | 5.208405  |
| C | -3.316040 | 3.007508  | 4.670491  |
| C | -2.569561 | 2.433726  | 3.642228  |
| C | 1.687854  | -2.127124 | -0.341273 |
| C | 0.850589  | -1.254864 | -1.061084 |
| C | 0.216397  | -1.672837 | -2.231609 |
| C | 0.403416  | -2.973794 | -2.704004 |
| C | 1.219453  | -3.857831 | -1.995473 |
| C | 1.859433  | -3.436038 | -0.828435 |
| C | 2.786707  | 0.304591  | 1.367876  |
| C | 2.717057  | 0.866903  | 2.655298  |
| C | 2.878191  | 2.239004  | 2.854049  |
| C | 3.121381  | 3.078361  | 1.764813  |
| C | 3.193800  | 2.538840  | 0.478496  |
| C | 3.024397  | 1.166943  | 0.281944  |
| H | -0.130167 | 0.755187  | 3.107246  |
| H | -1.100004 | -0.648152 | 3.599298  |
| H | -3.155389 | -0.410815 | 0.731280  |
| H | 0.398039  | 1.514361  | 1.051882  |
| H | 0.714625  | 3.062543  | -0.817070 |
| H | -1.249019 | 3.953102  | -2.069851 |
| H | -3.547476 | 3.295217  | -1.370750 |
| H | -3.867552 | 1.779577  | 0.553110  |
| H | -4.243871 | -0.497781 | 3.304805  |
| H | -5.596017 | 0.526081  | 5.126733  |
| H | -4.995475 | 2.773423  | 6.005392  |
| H | -3.048527 | 3.990784  | 5.046993  |
| H | -1.731272 | 2.975229  | 3.212453  |
| H | 0.690994  | -0.243226 | -0.704477 |
| H | -0.418355 | -0.979608 | -2.776656 |
| H | -0.082421 | -3.296912 | -3.620313 |
| H | 1.369493  | -4.870892 | -2.358513 |
| H | 2.513829  | -4.128209 | -0.307852 |
| H | 2.540252  | 0.223923  | 3.513321  |
| H | 2.828947  | 2.650561  | 3.857848  |
| H | 3.260390  | 4.144464  | 1.917844  |
| H | 3.389799  | 3.185959  | -0.372192 |
| H | 3.079753  | 0.769408  | -0.724322 |
| B | 5.858294  | -2.225558 | 0.342300  |
| H | 4.066542  | -2.019180 | 0.857975  |
| C | 5.476981  | -2.828610 | -1.070058 |
| C | 6.194465  | -0.692357 | 0.519296  |
| C | 6.204514  | -3.214300 | 1.530627  |
| C | 5.838244  | -4.121656 | -1.475171 |
| C | 4.666769  | -2.133442 | -1.977551 |
| C | 6.673990  | 0.124463  | -0.511601 |
| C | 5.982008  | -0.043192 | 1.744139  |
| C | 5.408173  | -4.322146 | 1.838752  |
| C | 7.327176  | -3.039372 | 2.347026  |
| C | 5.675947  | -5.190639 | 2.889560  |
| F | 4.300984  | -4.579555 | 1.111101  |

|   |          |           |           |
|---|----------|-----------|-----------|
| C | 6.808113 | -4.976036 | 3.673805  |
| F | 4.869261 | -6.226401 | 3.148880  |
| C | 7.641914 | -3.895276 | 3.399367  |
| F | 7.091276 | -5.803729 | 4.681610  |
| F | 8.733390 | -3.688781 | 4.145655  |
| F | 8.174399 | -2.017383 | 2.129237  |
| C | 5.410147 | -4.690998 | -2.671671 |
| F | 6.640754 | -4.882944 | -0.711211 |
| C | 4.580446 | -3.962749 | -3.520498 |
| F | 5.784835 | -5.930716 | -3.009876 |
| C | 4.204600 | -2.668711 | -3.171832 |
| F | 4.141526 | -4.505288 | -4.657844 |
| F | 3.386830 | -1.971056 | -3.966112 |
| F | 4.244854 | -0.889637 | -1.681241 |
| C | 6.897915 | 1.489569  | -0.356173 |
| F | 6.948746 | -0.394399 | -1.721110 |
| C | 6.648493 | 2.088680  | 0.875855  |
| F | 7.346730 | 2.230036  | -1.377968 |
| C | 6.194799 | 1.314641  | 1.940040  |
| F | 6.839463 | 3.399960  | 1.035403  |
| F | 5.947691 | 1.885777  | 3.124300  |
| F | 5.496285 | -0.731327 | 2.795714  |

=====  
**TS2**  
=====

|    |           |           |           |
|----|-----------|-----------|-----------|
| C  | -0.321122 | -1.211230 | -0.610621 |
| C  | 1.106153  | -1.691496 | -0.846735 |
| O  | 0.436522  | 0.307625  | 0.600134  |
| O  | 1.959687  | -0.702437 | -1.386207 |
| H  | 1.188724  | 0.574737  | 0.045408  |
| Si | 0.707727  | 0.709543  | 2.254029  |
| H  | -0.256481 | 1.700796  | 2.745834  |
| C  | -1.191306 | -1.954554 | 0.268545  |
| C  | -0.738745 | -3.086148 | 0.992170  |
| C  | -1.608636 | -3.780284 | 1.815976  |
| C  | -2.936298 | -3.351454 | 1.954150  |
| C  | -3.394569 | -2.229321 | 1.261950  |
| C  | -2.531618 | -1.527882 | 0.429352  |
| C  | -0.913633 | -0.446486 | -1.738228 |
| C  | -0.540174 | 0.858717  | -2.112051 |
| C  | -1.034330 | 1.418063  | -3.288113 |
| C  | -1.882162 | 0.686665  | -4.122404 |
| C  | -2.273442 | -0.600347 | -3.753220 |
| C  | -1.807799 | -1.159820 | -2.566180 |
| C  | 0.570609  | -0.880706 | 3.231705  |
| C  | 1.606422  | -1.835869 | 3.207910  |
| C  | 1.503221  | -3.030777 | 3.920757  |
| C  | 0.361342  | -3.288194 | 4.685017  |
| C  | -0.670940 | -2.349697 | 4.728656  |
| C  | -0.568892 | -1.157511 | 4.008854  |
| C  | 2.416694  | 1.460092  | 2.213579  |
| C  | 3.499935  | 0.842558  | 1.557334  |
| C  | 4.760474  | 1.439085  | 1.535194  |
| C  | 4.958678  | 2.670808  | 2.164360  |
| C  | 3.892803  | 3.307828  | 2.802640  |
| C  | 2.632378  | 2.709248  | 2.822771  |
| H  | 1.565182  | -2.006195 | 0.090345  |
| H  | 1.026951  | -2.571480 | -1.506156 |
| H  | 1.606441  | -0.413040 | -2.241542 |
| H  | 0.287493  | -3.422292 | 0.917330  |
| H  | -1.252107 | -4.639058 | 2.373119  |

|   |           |           |           |
|---|-----------|-----------|-----------|
| H | -3.609227 | -3.889604 | 2.615147  |
| H | -4.415546 | -1.885569 | 1.381077  |
| H | -2.878345 | -0.638678 | -0.080130 |
| H | 0.033983  | 1.477348  | -1.438542 |
| H | -0.779128 | 2.443290  | -3.534666 |
| H | -2.272174 | 1.132743  | -5.031352 |
| H | -2.975121 | -1.154748 | -4.366837 |
| H | -2.122494 | -2.158365 | -2.284223 |
| H | 2.516639  | -1.636071 | 2.646997  |
| H | 2.315896  | -3.751668 | 3.894590  |
| H | 0.282176  | -4.213568 | 5.249177  |
| H | -1.562821 | -2.543121 | 5.317806  |
| H | -1.394430 | -0.456619 | 4.039132  |
| H | 3.362416  | -0.102654 | 1.035714  |
| H | 5.584143  | 0.949402  | 1.023451  |
| H | 5.938976  | 3.138483  | 2.145201  |
| H | 4.038556  | 4.275680  | 3.273157  |
| H | 1.805532  | 3.233843  | 3.291890  |
| H | -2.272328 | 1.504529  | 0.027159  |
| B | -3.164985 | 2.312921  | 0.157250  |
| C | -3.784491 | 2.510867  | -1.337804 |
| C | -4.229459 | 1.654503  | 1.217678  |
| C | -2.511583 | 3.647864  | 0.832719  |
| C | -3.664856 | 3.651809  | -2.131916 |
| C | -4.387805 | 1.429093  | -1.978986 |
| C | -5.620165 | 1.767097  | 1.179448  |
| C | -3.747503 | 0.892553  | 2.276550  |
| C | -1.138739 | 3.852719  | 0.931147  |
| C | -3.288531 | 4.642640  | 1.429657  |
| C | -0.557311 | 4.911655  | 1.624851  |
| F | -0.261814 | 2.986906  | 0.350691  |
| C | -1.375368 | 5.862685  | 2.224032  |
| F | 0.783561  | 5.014474  | 1.730637  |
| C | -2.758523 | 5.731800  | 2.117225  |
| F | -0.839370 | 6.893548  | 2.895068  |
| F | -3.557692 | 6.651505  | 2.680916  |
| F | -4.634055 | 4.569383  | 1.358422  |
| C | -4.090482 | 3.715602  | -3.461191 |
| F | -3.094107 | 4.776462  | -1.649270 |
| C | -4.673256 | 2.599986  | -4.050701 |
| F | -3.925918 | 4.838098  | -4.181120 |
| C | -4.829077 | 1.441844  | -3.295020 |
| F | -5.043808 | 2.621950  | -5.342096 |
| F | -5.330314 | 0.330184  | -3.867944 |
| F | -4.522772 | 0.244027  | -1.323353 |
| C | -6.466493 | 1.147547  | 2.099951  |
| F | -6.217505 | 2.487481  | 0.212262  |
| C | -5.925806 | 0.379535  | 3.129968  |
| F | -7.799000 | 1.281375  | 2.008435  |
| C | -4.543728 | 0.248991  | 3.217915  |
| F | -6.725759 | -0.229598 | 4.018813  |
| F | -3.988747 | -0.512163 | 4.186248  |
| F | -2.407406 | 0.707766  | 2.412520  |

=====  
**TS3**  
=====

|    |           |           |          |
|----|-----------|-----------|----------|
| C  | -1.871341 | 0.853638  | 2.405684 |
| C  | -0.450683 | 0.610828  | 2.957517 |
| O  | -2.484839 | -0.450122 | 2.528399 |
| O  | 0.183445  | -0.464811 | 2.290000 |
| Si | 2.684606  | -1.411524 | 1.338299 |

|   |           |           |           |
|---|-----------|-----------|-----------|
| H | -0.492306 | -1.154550 | 2.194186  |
| H | 2.719994  | -1.529289 | 2.812391  |
| C | -1.918075 | 1.296733  | 0.941172  |
| C | -0.776129 | 1.520315  | 0.165461  |
| C | -0.894971 | 1.894275  | -1.176007 |
| C | -2.151907 | 2.048376  | -1.760147 |
| C | -3.298992 | 1.842807  | -0.989163 |
| C | -3.179800 | 1.479372  | 0.350943  |
| C | -2.566926 | 1.876461  | 3.306094  |
| C | -3.460269 | 1.466469  | 4.300237  |
| C | -4.047937 | 2.405394  | 5.151295  |
| C | -3.739477 | 3.760376  | 5.024197  |
| C | -2.840704 | 4.174604  | 4.037610  |
| C | -2.260440 | 3.238803  | 3.182416  |
| C | 1.466802  | -2.519939 | 0.442757  |
| C | 0.427766  | -1.990899 | -0.344855 |
| C | -0.411436 | -2.827955 | -1.081110 |
| C | -0.231020 | -4.212316 | -1.041261 |
| C | 0.786039  | -4.756389 | -0.254402 |
| C | 1.629779  | -3.917232 | 0.475915  |
| C | 2.706847  | 0.377456  | 0.788911  |
| C | 2.867919  | 1.395682  | 1.745890  |
| C | 2.955060  | 2.736135  | 1.366871  |
| C | 2.889958  | 3.085424  | 0.016317  |
| C | 2.729210  | 2.088678  | -0.948822 |
| C | 2.635013  | 0.749237  | -0.566011 |
| H | 0.172752  | 1.499790  | 2.831605  |
| H | -0.546785 | 0.409317  | 4.033542  |
| H | -3.133523 | -0.546197 | 1.820090  |
| H | 0.210724  | 1.392506  | 0.589114  |
| H | 0.006758  | 2.059699  | -1.756883 |
| H | -2.239442 | 2.335829  | -2.803889 |
| H | -4.283937 | 1.978661  | -1.426570 |
| H | -4.076366 | 1.364659  | 0.956840  |
| H | -3.689158 | 0.411028  | 4.396275  |
| H | -4.746291 | 2.075456  | 5.915422  |
| H | -4.196531 | 4.489748  | 5.686753  |
| H | -2.597098 | 5.227737  | 3.929383  |
| H | -1.576777 | 3.565628  | 2.403672  |
| H | 0.271176  | -0.918602 | -0.382554 |
| H | -1.201428 | -2.396981 | -1.689991 |
| H | -0.877902 | -4.864043 | -1.621661 |
| H | 0.931946  | -5.832553 | -0.220182 |
| H | 2.433723  | -4.356926 | 1.057851  |
| H | 2.931344  | 1.137201  | 2.799474  |
| H | 3.087981  | 3.505229  | 2.122039  |
| H | 2.970706  | 4.126312  | -0.282613 |
| H | 2.684916  | 2.353623  | -2.001773 |
| H | 2.506380  | -0.007855 | -1.330108 |
| H | 4.033382  | -1.972405 | 0.913271  |
| B | 5.674118  | -2.385673 | 0.106100  |
| C | 5.914401  | -0.908475 | -0.399292 |
| C | 6.356916  | -2.836258 | 1.462824  |
| C | 5.037576  | -3.486813 | -0.835399 |
| C | 6.086290  | -0.563653 | -1.745101 |
| C | 5.925014  | 0.169030  | 0.498306  |
| C | 7.614754  | -2.368894 | 1.858990  |
| C | 5.743317  | -3.726185 | 2.350463  |
| C | 3.992657  | -3.190285 | -1.720678 |
| C | 5.400486  | -4.840621 | -0.787151 |
| C | 3.319025  | -4.143159 | -2.472060 |
| F | 3.550164  | -1.923706 | -1.834208 |

|   |          |           |           |
|---|----------|-----------|-----------|
| C | 3.708672 | -5.475889 | -2.376213 |
| F | 2.291505 | -3.799495 | -3.254669 |
| C | 4.762308 | -5.826196 | -1.535756 |
| F | 3.070913 | -6.413516 | -3.079498 |
| F | 5.148968 | -7.104878 | -1.451013 |
| F | 6.411060 | -5.254539 | -0.003203 |
| C | 6.226370 | 0.751516  | -2.179316 |
| F | 6.129031 | -1.516232 | -2.692943 |
| C | 6.206153 | 1.786238  | -1.247650 |
| F | 6.376781 | 1.030192  | -3.480669 |
| C | 6.063024 | 1.493470  | 0.105596  |
| F | 6.318980 | 3.053823  | -1.650080 |
| F | 6.036167 | 2.483882  | 1.004511  |
| F | 5.741802 | -0.049642 | 1.815100  |
| C | 8.225107 | -2.748487 | 3.051668  |
| F | 8.305241 | -1.523331 | 1.072913  |
| C | 7.565244 | -3.626055 | 3.907811  |
| F | 9.434384 | -2.278997 | 3.380509  |
| C | 6.308705 | -4.117424 | 3.557705  |
| F | 8.132699 | -3.996648 | 5.057407  |
| F | 5.668112 | -4.959964 | 4.376594  |
| F | 4.527251 | -4.235252 | 2.061263  |

=====  
**TS4**  
=====

|    |           |           |           |
|----|-----------|-----------|-----------|
| C  | -0.970884 | 0.469605  | 2.128958  |
| C  | 0.332301  | 0.264644  | 2.769686  |
| O  | -0.789077 | 1.640967  | 3.065552  |
| O  | 1.193837  | -1.612668 | 1.986518  |
| Si | 2.509414  | -1.496947 | 0.893863  |
| H  | 1.440314  | -2.018252 | 2.838170  |
| H  | 3.511010  | -2.489784 | 1.339037  |
| C  | -2.124604 | -0.404270 | 2.527452  |
| C  | -1.932745 | -1.685825 | 3.055432  |
| C  | -3.034872 | -2.442625 | 3.460001  |
| C  | -4.323307 | -1.922576 | 3.336878  |
| C  | -4.517530 | -0.646958 | 2.796337  |
| C  | -3.422750 | 0.109128  | 2.386422  |
| C  | -0.939644 | 0.959824  | 0.703847  |
| C  | -0.641865 | 2.289794  | 0.387504  |
| C  | -0.523013 | 2.672514  | -0.949407 |
| C  | -0.672980 | 1.729356  | -1.968285 |
| C  | -0.965712 | 0.401414  | -1.650103 |
| C  | -1.113378 | 0.019975  | -0.317712 |
| C  | 1.781516  | -1.892929 | -0.779087 |
| C  | 2.307518  | -1.357323 | -1.967591 |
| C  | 1.754371  | -1.681038 | -3.208061 |
| C  | 0.666409  | -2.553725 | -3.281004 |
| C  | 0.134262  | -3.102829 | -2.110748 |
| C  | 0.688756  | -2.774501 | -0.873198 |
| C  | 3.182425  | 0.238894  | 1.022873  |
| C  | 4.053960  | 0.556912  | 2.084850  |
| C  | 4.412870  | 1.880633  | 2.343236  |
| C  | 3.907063  | 2.909653  | 1.544772  |
| C  | 3.046162  | 2.613751  | 0.484950  |
| C  | 2.684956  | 1.289836  | 0.227162  |
| H  | 1.199355  | 0.780740  | 2.386972  |
| H  | 0.390627  | -0.221675 | 3.730330  |
| H  | -1.151627 | 1.421400  | 3.948541  |
| H  | -0.939136 | -2.105959 | 3.137171  |
| H  | -2.873206 | -3.427997 | 3.882855  |

|   |           |           |           |   |           |           |          |
|---|-----------|-----------|-----------|---|-----------|-----------|----------|
| H | -5.177709 | -2.509665 | 3.660000  | C | 3.856292  | -1.634267 | 7.381669 |
| H | -5.520447 | -0.243747 | 2.695307  | C | 3.321084  | 2.887986  | 5.346306 |
| H | -3.564360 | 1.098048  | 1.959736  | F | 4.492771  | 0.887258  | 5.343190 |
| H | -0.497457 | 3.016688  | 1.177928  | C | 0.938058  | 2.915666  | 5.503921 |
| H | -0.301601 | 3.707623  | -1.191713 | F | -0.274293 | 0.941858  | 5.661524 |
| H | -0.560961 | 2.027360  | -3.006466 | C | -0.929033 | -1.963987 | 7.829752 |
| H | -1.061808 | -0.344986 | -2.431051 | F | 0.572480  | -0.196534 | 8.005256 |
| H | -1.337103 | -1.011195 | -0.070098 | C | -0.812839 | -3.476357 | 5.971803 |
| H | 3.149816  | -0.671455 | -1.926639 | F | 0.818252  | -3.218170 | 4.328304 |
| H | 2.171043  | -1.253403 | -4.115553 | C | 5.527608  | -2.904416 | 5.594945 |
| H | 0.236631  | -2.808290 | -4.245844 | F | 4.128102  | -2.287157 | 3.834915 |
| H | -0.709723 | -3.784910 | -2.164092 | C | 5.006468  | -2.263574 | 7.852818 |
| H | 0.259617  | -3.192320 | 0.033833  | F | 3.077791  | -1.021966 | 8.297697 |
| H | 4.425938  | -0.228174 | 2.736241  | C | 5.849107  | -2.906337 | 6.949266 |
| H | 5.057573  | 2.109209  | 3.184390  | F | 6.336429  | -3.515468 | 4.714116 |
| H | 4.174889  | 3.940319  | 1.759755  | F | 6.960812  | -3.519010 | 7.379021 |
| H | 2.642568  | 3.411680  | -0.131895 | F | 5.311231  | -2.257809 | 9.159572 |
| H | 1.988416  | 1.080554  | -0.579869 | C | 2.132731  | 3.611561  | 5.365187 |
| H | 2.105833  | -1.089479 | 4.305844  | F | 4.485655  | 3.530504  | 5.155778 |
| C | 2.123242  | 0.746941  | 5.609339  | F | 2.138803  | 4.942826  | 5.221169 |
| C | 0.827033  | -1.645685 | 6.137463  | F | -0.239830 | 3.563677  | 5.461956 |
| C | 3.488717  | -1.606969 | 6.037073  | C | -1.432080 | -3.069775 | 7.147603 |
| C | 3.293876  | 1.499741  | 5.461534  | F | -1.525558 | -1.557401 | 8.959462 |
| C | 0.970548  | 1.531018  | 5.627964  | F | -2.504759 | -3.725533 | 7.609976 |
| C | 0.174744  | -1.282742 | 7.319531  | F | -1.306471 | -4.518923 | 5.274036 |
| C | 0.290757  | -2.766673 | 5.508535  | B | 2.130185  | -0.890063 | 5.500359 |
| C | 4.364921  | -2.262715 | 5.175127  |   |           |           |          |

**Table S12.** Vibrational Frequencies of All Optimized Geometries

|                                                  |         |         |         |         |         |                                      |         |         |         |         |         |
|--------------------------------------------------|---------|---------|---------|---------|---------|--------------------------------------|---------|---------|---------|---------|---------|
| =====                                            |         |         |         |         |         |                                      |         |         |         |         |         |
| <b>1a</b>                                        |         |         |         |         |         |                                      |         |         |         |         |         |
| =====                                            |         |         |         |         |         |                                      |         |         |         |         |         |
| 33.74                                            | 35.91   | 65.18   | 112.59  | 137.68  | 207.25  | 786.31                               | 786.35  | 786.81  | 869.13  | 1000.32 | 1001.32 |
| 234.25                                           | 244.00  | 245.19  | 296.25  | 331.31  | 352.92  | 1001.33                              | 1040.68 | 1040.73 | 1140.13 | 1173.28 | 1178.15 |
| 366.85                                           | 412.37  | 417.05  | 439.75  | 473.20  | 534.78  | 1178.17                              | 1201.84 | 1201.93 | 1327.97 | 1333.28 | 1333.32 |
| 558.32                                           | 606.01  | 633.54  | 633.80  | 665.29  | 711.16  | 1340.24                              | 1355.30 | 1355.33 | 1411.87 | 1411.98 | 1431.83 |
| 717.72                                           | 728.75  | 771.92  | 784.05  | 854.64  | 866.98  | 1507.03                              | 1520.32 | 1520.42 | 1558.71 | 1558.72 | 1559.97 |
| 893.27                                           | 925.61  | 934.39  | 969.39  | 971.12  | 981.76  | 1653.52                              | 1656.28 | 1656.29 | 1678.94 | 1678.96 | 1680.57 |
| 995.65                                           | 1000.60 | 1016.76 | 1018.12 | 1045.53 | 1059.34 | =====                                |         |         |         |         |         |
| 1067.38                                          | 1085.62 | 1097.05 | 1116.19 | 1156.58 | 1194.38 | <b>SiPh<sub>2</sub>H<sub>2</sub></b> |         |         |         |         |         |
| 1195.14                                          | 1198.63 | 1201.54 | 1218.57 | 1222.56 | 1263.27 | =====                                |         |         |         |         |         |
| 1301.96                                          | 1342.51 | 1347.79 | 1363.28 | 1367.67 | 1390.46 | 20.37                                | 36.30   | 57.19   | 152.39  | 160.56  | 200.78  |
| 1442.67                                          | 1488.72 | 1491.48 | 1525.38 | 1538.08 | 1539.74 | 242.76                               | 393.76  | 404.01  | 408.06  | 423.58  | 430.93  |
| 1639.23                                          | 1639.97 | 1659.27 | 1662.93 | 3017.06 | 3065.14 | 480.68                               | 610.25  | 632.83  | 632.87  | 697.07  | 709.00  |
| 3175.30                                          | 3175.53 | 3184.35 | 3185.60 | 3194.70 | 3199.24 | 711.92                               | 716.59  | 726.57  | 759.17  | 779.55  | 866.64  |
| 3204.45                                          | 3210.44 | 3217.97 | 3229.93 | 3774.13 | 3842.43 | 873.75                               | 874.62  | 937.25  | 939.20  | 975.06  | 982.65  |
| =====                                            |         |         |         |         |         |                                      |         |         |         |         |         |
| <b>B(C<sub>6</sub>F<sub>5</sub>)<sub>3</sub></b> |         |         |         |         |         |                                      |         |         |         |         |         |
| =====                                            |         |         |         |         |         |                                      |         |         |         |         |         |
| 22.25                                            | 22.39   | 36.07   | 36.78   | 36.83   | 45.39   | 984.18                               | 1006.12 | 1006.44 | 1013.14 | 1013.65 | 1052.92 |
| 111.12                                           | 116.92  | 117.06  | 134.52  | 134.59  | 134.66  | 1054.00                              | 1105.81 | 1107.23 | 1131.35 | 1136.34 | 1196.95 |
| 150.96                                           | 151.05  | 165.18  | 167.38  | 172.21  | 172.27  | 1196.98                              | 1222.07 | 1223.54 | 1317.76 | 1322.17 | 1362.47 |
| 232.46                                           | 234.04  | 234.15  | 268.69  | 268.76  | 268.77  | 1363.58                              | 1468.50 | 1471.44 | 1527.84 | 1528.69 | 1623.63 |
| 277.80                                           | 277.86  | 278.85  | 315.66  | 316.01  | 316.10  | 1624.83                              | 1646.95 | 1647.03 | 2215.54 | 2221.25 | 3167.09 |
| 349.26                                           | 349.33  | 356.34  | 356.94  | 390.42  | 390.54  | 3167.17                              | 3170.92 | 3171.85 | 3181.85 | 3182.22 | 3192.05 |
| 403.98                                           | 404.04  | 405.07  | 443.58  | 445.30  | 445.30  | 3192.24                              | 3203.37 | 3203.70 | =====   |         |         |
| 473.65                                           | 473.68  | 497.96  | 546.81  | 578.57  | 578.59  | <b>HSiPh<sub>2</sub>OH</b>           |         |         |         |         |         |
| 582.76                                           | 620.05  | 620.07  | 632.06  | 651.65  | 651.67  | =====                                |         |         |         |         |         |
| 655.68                                           | 655.72  | 659.23  | 686.03  | 686.14  | 708.39  | 27.45                                | 43.82   | 65.44   | 105.90  | 130.84  | 170.41  |
| =====                                            |         |         |         |         |         |                                      |         |         |         |         |         |
| 27.45 43.82 65.44 105.90 130.84 170.41           |         |         |         |         |         |                                      |         |         |         |         |         |
| 191.54 244.56 273.09 316.04 396.09 405.12        |         |         |         |         |         |                                      |         |         |         |         |         |
| 411.35 444.60 487.63 498.51 632.05 633.04        |         |         |         |         |         |                                      |         |         |         |         |         |
| 694.27 712.70 716.59 720.26 752.68 757.19        |         |         |         |         |         |                                      |         |         |         |         |         |
| 815.51 832.94 875.29 878.23 884.17 917.44        |         |         |         |         |         |                                      |         |         |         |         |         |
| 940.88 945.24 986.23 990.15 1008.12 1009.09      |         |         |         |         |         |                                      |         |         |         |         |         |
| =====                                            |         |         |         |         |         |                                      |         |         |         |         |         |

1012.57 1013.42 1053.37 1054.13 1104.50 1107.18  
1133.81 1140.07 1196.52 1197.11 1219.77 1222.69  
1317.44 1321.99 1361.19 1363.27 1467.73 1470.58  
1526.63 1528.00 1622.73 1623.85 1647.06 1647.65  
2260.62 3166.64 3168.94 3170.49 3173.81 3181.54  
3183.14 3191.93 3192.31 3203.01 3203.46 3880.71

=====

**INT1**

=====

12.37 15.01 23.20 25.70 29.79 34.92  
37.49 39.98 44.82 48.73 50.63 52.05  
56.59 60.04 62.40 78.37 82.59 85.90  
89.26 97.98 105.18 110.57 112.66 118.16  
121.81 127.78 131.41 134.58 142.26 145.95  
148.00 158.58 162.60 171.40 175.53 179.57  
180.50 187.56 192.84 202.80 207.81 231.88  
233.39 241.13 242.21 250.58 254.97 266.17  
266.69 266.92 277.46 280.28 285.90 302.26  
306.38 312.19 318.43 323.31 332.41 338.40  
348.63 349.38 358.39 368.47 372.30 378.00  
402.58 404.50 406.13 408.88 411.05 412.47  
414.57 417.28 421.11 425.87 450.21 452.36  
452.67 453.19 470.92 473.35 481.58 482.95  
489.63 515.04 532.11 563.18 577.57 580.57  
584.55 603.23 606.49 611.19 625.07 629.65  
630.11 631.29 631.99 633.69 634.04 641.82  
648.36 652.82 653.91 669.42 669.88 674.88  
705.95 708.08 712.33 713.97 716.69 718.25  
719.78 726.62 751.27 752.25 754.02 759.25  
769.96 772.34 779.51 792.38 805.49 823.95  
855.33 861.68 861.87 879.91 882.59 885.14  
919.71 926.47 935.60 940.54 950.53 952.79  
955.04 976.09 981.78 989.51 994.86 995.65  
996.70 998.25 999.40 1009.40 1012.69 1014.75  
1017.46 1018.57 1019.40 1041.20 1043.88 1043.92  
1051.57 1053.09 1055.83 1069.56 1072.41 1089.16  
1109.72 1111.15 1112.50 1114.20 1127.26 1128.26  
1134.79 1136.00 1137.64 1148.05 1148.96 1156.78  
1161.58 1199.95 1200.03 1202.03 1204.06 1212.10  
1224.57 1227.56 1230.99 1235.93 1245.30 1299.38  
1311.68 1313.23 1315.35 1317.96 1322.53 1325.60  
1328.03 1333.72 1335.76 1346.73 1352.45 1366.79  
1371.79 1373.44 1377.33 1407.32 1414.45 1422.85  
1442.98 1465.78 1469.71 1471.87 1489.61 1492.14  
1496.48 1505.14 1515.72 1526.58 1530.28 1533.60  
1540.22 1547.42 1551.46 1553.35 1555.63 1621.21  
1623.11 1637.37 1641.03 1644.66 1647.14 1656.01  
1659.24 1660.50 1660.98 1662.98 1678.03 1678.96  
1681.14 2158.67 2356.73 2767.12 3028.62 3140.51  
3178.13 3183.81 3187.31 3187.36 3187.94 3191.80  
3193.69 3198.26 3200.76 3202.78 3203.89 3208.42  
3210.74 3212.48 3215.92 3218.65 3221.01 3232.02  
3252.60 3268.10 3837.95

=====

**INT2**

=====

14.07 22.99 26.59 29.52 30.91 37.02  
41.55 47.65 53.87 59.67 61.96 78.58  
91.66 103.55 104.40 109.78 117.46 120.78  
129.33 132.28 135.67 147.23 149.78 154.55  
156.14 159.18 173.59 179.64 185.41 194.23

225.86 232.40 234.65 237.80 244.18 265.71  
266.48 268.20 276.77 277.51 284.31 297.51  
311.70 313.75 319.31 320.50 345.91 346.83  
349.57 353.80 360.32 383.89 384.94 405.96  
406.77 409.61 414.92 427.79 441.65 447.62  
448.26 448.88 465.07 469.95 472.13 488.49  
540.94 560.94 575.16 575.63 580.44 600.45  
602.20 603.30 621.07 622.21 623.95 630.35  
632.41 649.54 650.12 651.78 673.67 680.82  
689.42 693.30 703.64 714.01 741.16 765.62  
770.30 787.98 789.73 816.74 849.54 852.19  
871.55 885.58 926.15 937.50 959.00 982.85  
987.02 991.09 992.94 996.52 1005.27 1008.43  
1014.36 1025.65 1035.15 1041.72 1048.73 1053.65  
1064.36 1086.04 1087.94 1101.77 1107.12 1131.66  
1133.07 1142.45 1147.19 1147.34 1152.45 1156.01  
1206.30 1209.01 1226.61 1236.15 1244.62 1269.70  
1307.37 1310.51 1314.30 1320.89 1332.91 1336.68  
1338.62 1339.23 1375.85 1383.85 1389.20 1395.39  
1412.42 1417.76 1438.53 1463.07 1484.73 1490.75  
1495.56 1506.95 1508.94 1530.00 1534.30 1544.98  
1546.72 1551.17 1556.13 1601.07 1606.71 1641.27  
1650.48 1654.68 1657.53 1660.13 1668.45 1674.26  
1678.56 2420.36 3064.17 3116.43 3198.90 3202.22  
3214.24 3214.62 3223.82 3227.25 3231.06 3237.26  
3238.04 3253.43 3818.56

=====

**INT3**

=====

6.90 9.93 16.54 17.64 22.82 23.75  
25.77 29.70 32.00 37.44 39.07 42.69  
46.14 48.69 54.64 58.16 59.65 63.92  
76.59 80.62 84.30 93.40 97.40 108.01  
117.07 126.22 131.78 136.61 138.84 145.22  
148.98 151.75 152.87 170.87 174.30 175.76  
179.36 185.84 191.64 212.79 226.95 231.74  
234.53 237.23 245.43 264.94 266.37 266.64  
266.74 276.51 278.79 280.33 289.41 311.34  
312.04 315.71 316.80 344.38 344.89 345.49  
354.51 356.24 362.00 375.75 389.04 390.06  
402.34 405.06 405.54 407.11 408.53 410.67  
411.49 415.04 447.61 448.46 449.23 451.56  
464.80 467.12 470.68 471.59 487.36 497.60  
509.54 518.14 554.40 562.04 574.34 575.28  
581.12 599.93 602.75 619.41 622.27 628.86  
629.77 630.77 631.71 633.09 633.63 637.68  
648.70 648.91 649.82 678.59 687.56 693.69  
704.02 706.74 709.13 710.14 715.57 717.44  
721.79 730.48 742.21 747.26 758.92 760.12  
764.63 767.51 773.04 793.02 794.40 840.13  
857.49 860.63 865.43 870.96 872.50 881.38  
928.60 931.74 935.52 937.04 943.69 955.81  
976.42 978.71 980.76 982.38 985.07 985.87  
994.62 999.12 1001.43 1003.73 1010.83 1011.51  
1013.00 1014.68 1016.42 1018.45 1018.88 1052.26  
1053.34 1053.97 1062.61 1074.23 1089.21 1104.29  
1105.53 1110.09 1110.72 1111.54 1120.27 1136.77  
1138.18 1145.42 1147.55 1149.27 1150.49 1157.40  
1157.81 1193.98 1197.32 1199.97 1200.66 1201.22  
1215.83 1223.37 1225.27 1227.24 1230.84 1243.70  
1303.83 1313.26 1315.27 1318.65 1323.99 1325.99  
1332.89 1335.01 1340.03 1345.92 1350.96 1365.04

1366.36 1370.57 1373.82 1387.63 1403.12 1407.32  
1417.12 1444.21 1469.85 1471.59 1488.75 1492.41  
1499.71 1504.47 1509.21 1522.28 1528.17 1529.78  
1538.40 1543.09 1548.15 1549.28 1551.86 1622.73  
1624.01 1639.42 1640.78 1647.15 1647.75 1655.83  
1658.87 1658.99 1659.31 1662.78 1674.69 1676.60  
1678.79 2393.17 2485.96 3153.53 3174.37 3177.24  
3177.62 3184.38 3186.23 3187.80 3188.25 3192.50  
3192.70 3196.77 3198.55 3201.01 3204.76 3207.24  
3208.49 3208.98 3214.64 3214.84 3217.96 3231.39  
3232.09 3346.26 3762.48

=====  
**2a**  
=====

25.89 37.42 69.09 109.29 151.59 207.29  
237.89 251.23 272.99 305.82 331.04 414.93  
417.68 445.85 487.67 546.47 608.59 634.35  
636.44 648.73 714.68 717.82 751.23 774.45  
803.64 860.55 862.53 867.60 926.20 932.15  
974.21 974.67 996.06 997.29 1007.05 1016.61  
1018.07 1053.03 1059.86 1064.40 1091.40 1112.91  
1129.47 1194.60 1195.45 1202.50 1214.29 1217.65  
1227.83 1247.00 1259.01 1293.22 1346.89 1356.00  
1364.17 1372.24 1377.05 1458.58 1491.90 1495.15  
1536.06 1538.83 1542.88 1637.11 1640.81 1659.54  
1663.97 2980.42 3018.52 3037.77 3169.73 3172.01  
3177.63 3179.45 3187.13 3189.85 3195.42 3202.34  
3205.55 3228.83 3825.97

=====  
**TS1**  
=====

-25.17 6.96 11.73 16.14 20.21 25.79  
29.49 31.33 34.84 36.63 39.94 43.86  
50.62 52.20 55.69 60.18 63.03 67.47  
72.05 82.46 88.38 89.02 94.98 111.31  
115.94 123.82 127.88 130.41 137.32 141.58  
150.24 155.14 160.93 166.77 167.75 170.32  
176.50 179.14 186.15 198.48 208.42 236.23  
237.51 239.19 240.64 243.55 247.92 258.74  
267.55 268.14 268.34 272.35 278.17 278.91  
280.59 301.87 314.20 315.95 318.29 333.61  
339.31 348.42 348.86 350.60 358.31 376.18  
393.62 394.85 404.94 405.47 409.04 409.39  
410.40 413.48 416.80 419.06 437.37 440.71  
445.31 447.80 449.57 455.39 474.34 475.42  
484.82 488.37 498.70 514.76 534.80 568.62  
579.07 580.16 584.43 605.77 616.68 617.91  
622.73 632.09 633.00 633.42 634.46 637.42  
649.76 651.15 653.73 656.19 659.01 671.56  
687.98 693.58 698.95 700.77 710.08 714.42  
718.31 719.64 720.30 731.18 744.19 759.01  
773.97 774.98 782.40 784.13 785.21 790.72  
860.55 866.45 869.04 873.98 879.01 891.03  
902.35 932.66 937.25 940.93 946.12 975.02  
982.24 983.67 986.64 990.01 992.94 994.93  
996.20 998.24 1002.94 1003.41 1004.03 1007.18  
1015.15 1016.45 1016.91 1018.16 1031.28 1032.27  
1038.23 1053.46 1055.34 1058.51 1061.98 1077.84  
1097.84 1107.85 1111.26 1118.18 1130.09 1132.30  
1133.01 1142.42 1167.53 1170.32 1171.76 1183.58  
1188.49 1195.32 1196.67 1197.12 1197.66 1203.12  
1214.23 1224.50 1225.83 1227.99 1228.76 1238.32

1318.23 1322.81 1328.12 1332.93 1333.11 1334.36  
1338.92 1342.03 1344.10 1345.24 1355.07 1362.67  
1366.05 1368.51 1371.54 1378.99 1414.57 1418.70  
1425.42 1431.76 1467.88 1471.16 1488.38 1489.60  
1505.80 1517.59 1519.33 1521.13 1529.72 1530.47  
1536.15 1540.34 1558.81 1559.63 1560.85 1621.91  
1623.74 1637.27 1639.31 1645.98 1646.29 1656.54  
1658.52 1659.44 1660.07 1661.44 1681.48 1681.85  
1683.01 1963.60 2278.24 3026.23 3118.92 3165.50  
3176.02 3176.69 3176.91 3181.05 3184.12 3185.30  
3186.61 3193.66 3193.90 3199.61 3201.02 3205.26  
3207.22 3211.21 3213.44 3220.18 3220.97 3232.95  
3258.12 3759.90 3830.00

=====  
**TS2**  
=====

-92.61 11.24 14.18 18.38 25.16 27.28  
30.97 33.41 36.20 37.62 39.31 40.93  
46.02 50.97 52.79 63.21 72.74 73.93  
76.69 82.02 92.17 98.17 102.69 110.16  
117.52 122.48 124.85 130.87 134.73 139.68  
141.15 146.34 151.58 157.92 166.09 171.38  
172.11 176.18 180.21 190.77 193.18 228.03  
230.84 232.84 240.48 245.69 266.25 266.38  
266.59 268.89 278.14 279.38 280.22 284.72  
302.77 309.56 313.28 315.70 316.51 328.32  
343.52 346.30 349.93 362.39 369.35 377.15  
393.29 396.19 403.84 405.08 405.42 406.30  
415.04 416.31 424.80 426.00 431.13 448.47  
450.07 450.34 459.82 469.49 471.96 473.26  
486.54 488.50 493.26 545.32 551.81 567.76  
575.08 576.88 582.27 585.80 599.18 600.60  
619.29 625.68 626.87 628.79 629.81 631.21  
632.85 646.67 647.90 649.69 650.38 677.35  
687.32 692.12 698.45 706.23 711.68 713.71  
717.90 722.62 724.06 755.25 755.64 756.33  
760.67 770.02 770.69 788.90 795.12 821.90  
848.73 855.38 856.28 868.13 874.30 879.65  
914.58 927.36 934.36 935.78 941.11 945.60  
957.88 972.18 976.69 980.62 989.50 991.42  
992.70 998.70 999.67 1000.25 1007.20 1012.76  
1013.55 1014.74 1015.28 1015.74 1027.29 1031.36  
1052.89 1053.63 1057.95 1069.08 1094.93 1097.49  
1099.62 1105.85 1109.32 1113.60 1123.88 1131.88  
1134.46 1135.35 1142.29 1144.28 1145.20 1148.06  
1151.02 1153.94 1197.01 1199.23 1206.06 1206.65  
1211.99 1225.20 1230.35 1235.31 1239.17 1268.28  
1307.93 1308.04 1310.76 1319.40 1320.09 1323.21  
1334.23 1336.03 1336.53 1339.37 1362.31 1366.26  
1370.72 1373.01 1386.37 1389.76 1406.55 1410.33  
1417.07 1436.27 1467.85 1470.47 1480.89 1489.20  
1499.24 1501.66 1503.79 1507.88 1528.13 1528.86  
1530.56 1540.53 1545.37 1547.20 1549.71 1618.17  
1620.81 1621.85 1623.61 1644.03 1646.00 1646.96  
1651.69 1655.78 1658.02 1658.43 1674.30 1675.63  
1677.32 2354.55 2470.62 2996.03 3145.24 3158.91  
3168.00 3179.28 3182.62 3191.62 3192.36 3198.48  
3200.84 3201.14 3202.16 3208.83 3210.27 3216.85  
3219.19 3226.34 3227.69 3238.19 3239.52 3257.92  
3278.07 3278.60 3767.67

=====  
**TS3**  
=====

```

=====
-26.05  5.43  11.41  15.12  19.69  25.04
 29.39  31.00  34.50  36.49  39.66  43.55
 50.61  51.73  54.78  59.61  62.98  67.73
 71.96  81.86  87.84  89.55  93.89  109.08
115.52 123.85 127.81 129.50 137.12 141.67
150.12 154.78 160.69 166.62 167.07 169.83
176.24 178.97 185.97 197.89 207.92 230.32
236.89 238.74 240.20 243.19 247.35 258.94
267.43 268.12 268.34 271.33 278.07 278.85
280.58 301.80 314.17 315.77 318.05 333.47
339.24 348.48 348.78 350.31 358.11 376.30
393.53 394.62 404.37 405.27 408.70 409.03
410.47 412.66 416.82 419.00 437.92 440.85
445.32 447.83 449.47 454.45 474.30 475.38
484.61 488.17 498.64 517.65 535.24 568.64
579.08 580.13 584.36 605.67 616.46 617.78
621.97 631.90 633.00 633.39 634.37 636.33
649.74 650.94 653.67 656.12 659.07 671.48
687.95 693.61 698.90 700.80 709.78 714.25
717.53 719.70 720.32 731.17 744.01 758.86
773.86 774.80 782.41 784.06 785.15 790.44
860.47 866.33 869.14 873.53 878.50 890.73
902.25 932.22 937.35 940.35 945.81 975.06
981.86 983.75 986.43 987.58 992.45 994.68
996.00 997.39 1002.86 1003.39 1003.97 1006.78
1015.15 1016.36 1016.86 1018.05 1031.24 1032.13
1038.16 1053.39 1055.27 1058.44 1061.81 1077.69
1097.71 1107.59 1111.13 1117.89 1130.01 1132.21
1133.06 1142.03 1167.50 1170.33 1171.68 1183.47
1188.42 1195.20 1196.57 1197.03 1197.58 1202.90
1213.85 1224.01 1225.37 1227.72 1228.05 1238.17
1318.14 1322.63 1328.06 1332.89 1333.08 1334.35
1338.71 1341.78 1344.08 1345.19 1354.88 1362.50
1365.66 1368.23 1371.20 1378.93 1414.46 1418.72
1425.41 1431.81 1467.86 1471.09 1488.28 1489.47
1505.69 1517.49 1519.28 1520.79 1529.63 1530.56
1536.03 1540.17 1558.86 1559.68 1560.91 1621.90
1623.77 1637.27 1639.23 1646.00 1646.30 1656.52
1658.49 1659.43 1660.05 1661.45 1681.50 1681.85
1683.02 1963.21 2278.44 3026.01 3118.28 3165.32
3176.00 3176.62 3176.91 3181.07 3184.06 3185.36
3186.59 3193.60 3193.84 3199.75 3201.04 3205.19
3207.12 3211.47 3213.52 3220.98 3221.29 3233.94
3256.05 3758.82 3830.33
=====

```

**TS4**

```

=====
-365.91  13.72  16.85  20.93  22.15  25.17
 27.80  31.45  37.08  43.01  45.52  47.82
 52.62  55.43  59.12  63.88  65.36  68.45
 77.68  87.08  95.22  98.04  107.30  110.89
115.39 123.24 125.60 131.15 136.69 139.17
152.79 157.87 161.00 169.03 169.34 174.48
178.95 183.81 187.30 197.91 208.62 229.73
231.18 237.01 244.14 245.85 249.42 265.99
266.46 266.59 276.83 279.25 287.24 292.27
301.45 310.99 315.89 317.82 325.31 333.34
341.33 347.07 351.63 363.88 374.91 376.62
399.62 402.78 406.63 407.24 411.68 412.23
415.42 420.04 420.94 438.99 447.83 448.73
450.99 453.63 469.65 469.78 471.71 487.58

```

```

489.19 500.25 537.94 556.65 559.78 573.82
576.55 580.39 594.35 599.71 607.62 619.83
625.61 631.31 631.49 631.84 632.68 632.88
636.63 649.32 653.18 655.14 671.44 694.50
695.89 711.72 715.08 717.88 722.73 723.37
725.96 728.36 749.06 755.98 756.94 771.94
774.11 776.60 779.04 789.40 791.53 834.25
841.71 847.50 858.07 863.79 871.21 880.10
883.94 904.26 924.43 939.18 940.66 948.57
959.18 962.47 969.75 985.38 988.42 991.95
993.89 997.09 1005.82 1006.89 1010.70 1012.29
1012.73 1014.80 1018.60 1019.11 1034.47 1034.76
1053.32 1055.03 1056.96 1057.55 1079.39 1088.92
1098.63 1105.03 1108.45 1111.15 1117.43 1119.49
1125.61 1134.43 1136.40 1138.94 1144.87 1146.31
1149.77 1156.35 1163.64 1183.58 1197.45 1198.18
1199.76 1202.87 1215.95 1222.17 1224.31 1230.01
1231.66 1308.11 1312.38 1317.58 1317.82 1323.18
1328.45 1330.61 1334.49 1335.46 1342.40 1357.58
1363.51 1367.31 1370.28 1371.02 1373.22 1394.53
1402.47 1419.13 1464.70 1468.22 1471.13 1489.83
1491.36 1496.89 1503.06 1513.46 1528.02 1528.39
1540.27 1543.78 1549.84 1551.79 1554.85 1619.72
1622.77 1639.31 1640.63 1644.57 1647.61 1653.36
1657.51 1659.39 1661.01 1661.40 1676.39 1678.53
1681.56 2289.14 2487.46 3173.59 3177.41 3180.08
3186.15 3187.78 3187.87 3191.88 3195.93 3197.61
3202.29 3203.00 3205.62 3207.99 3211.19 3215.12
3227.09 3228.19 3228.99 3229.74 3230.31 3262.58
3366.60 3642.59 3689.

```

## 10. Spectral copies of $^1\text{H}$ and $^{13}\text{C}$ NMR

### 1,1-diphenylethane-1,2-diol (1a)

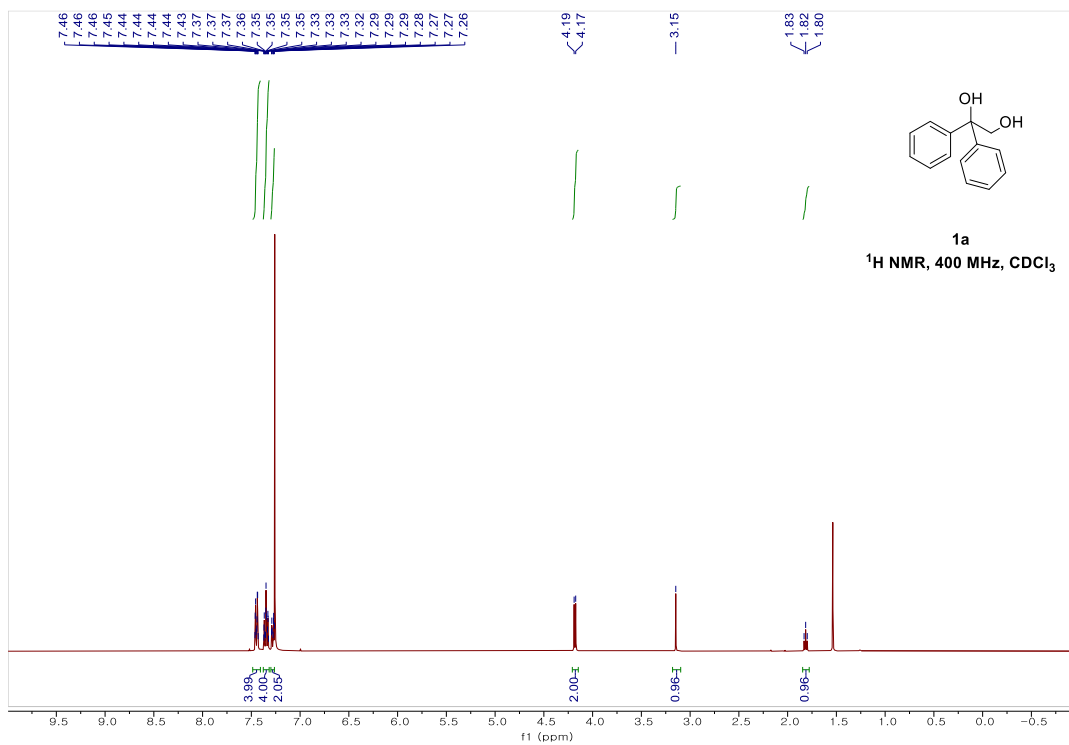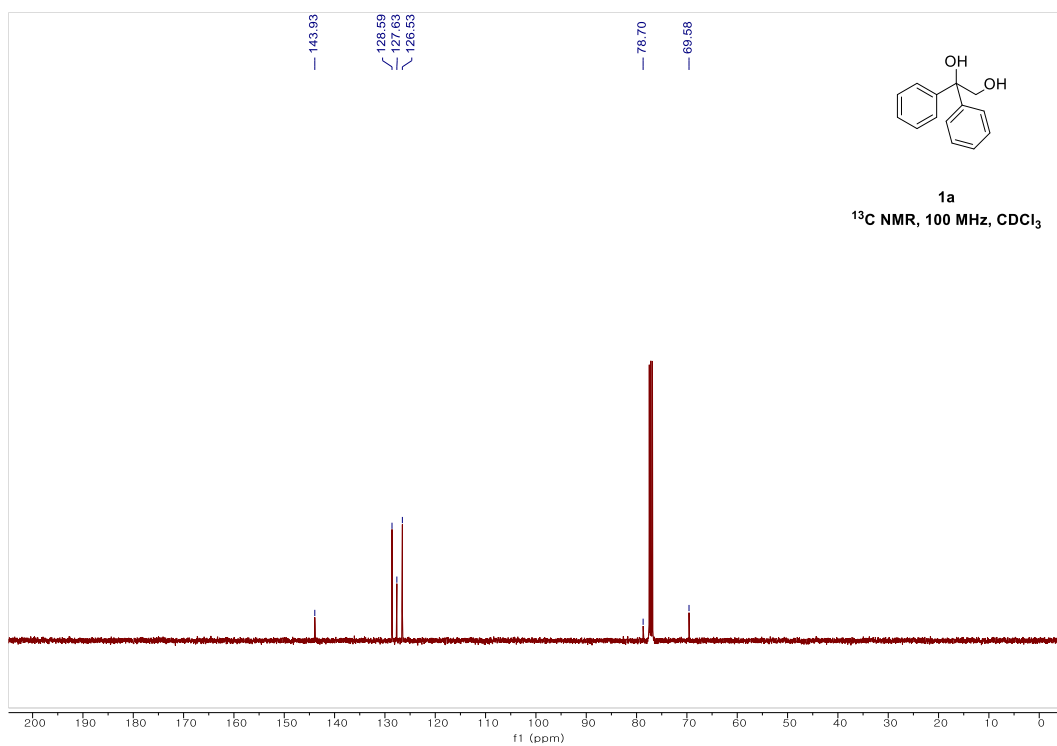

# 1-(4-chlorophenyl)-1-phenylethane-1,2-diol (1b)

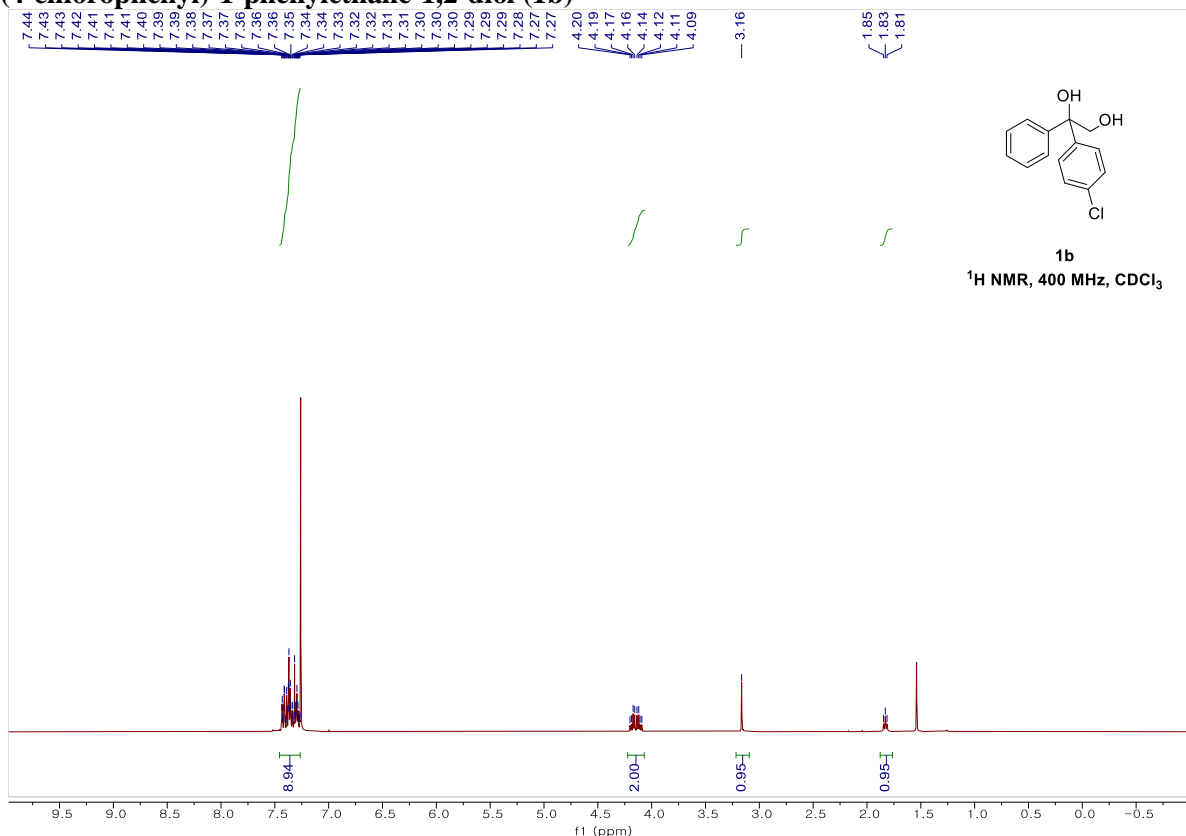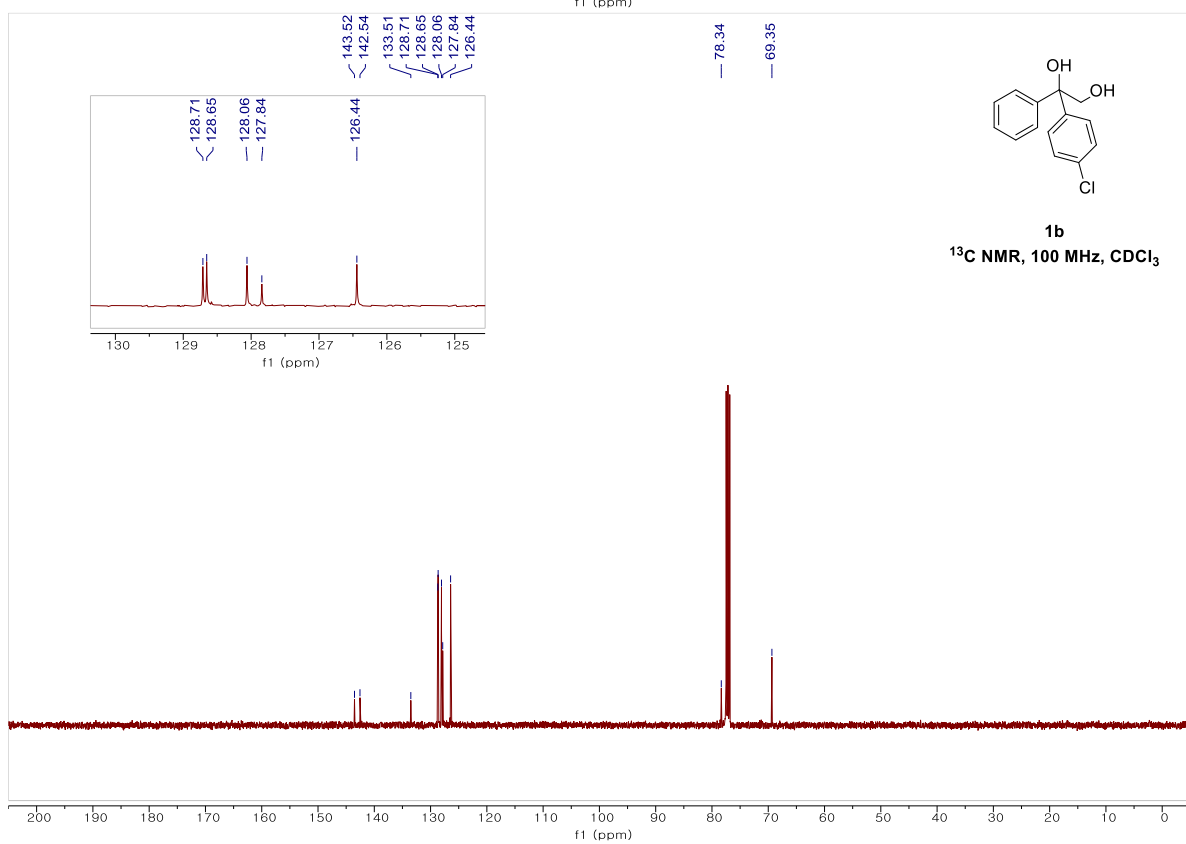

# 1-(4-fluorophenyl)-1-phenylethane-1,2-diol (1c)

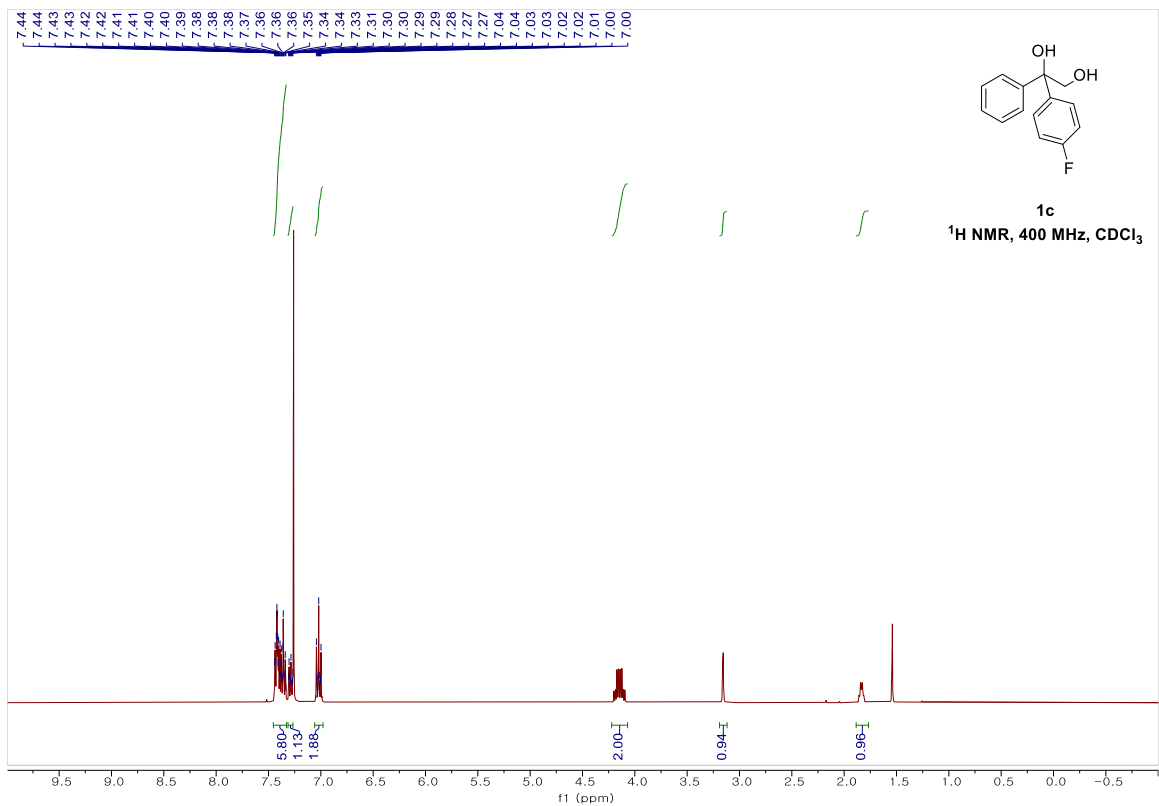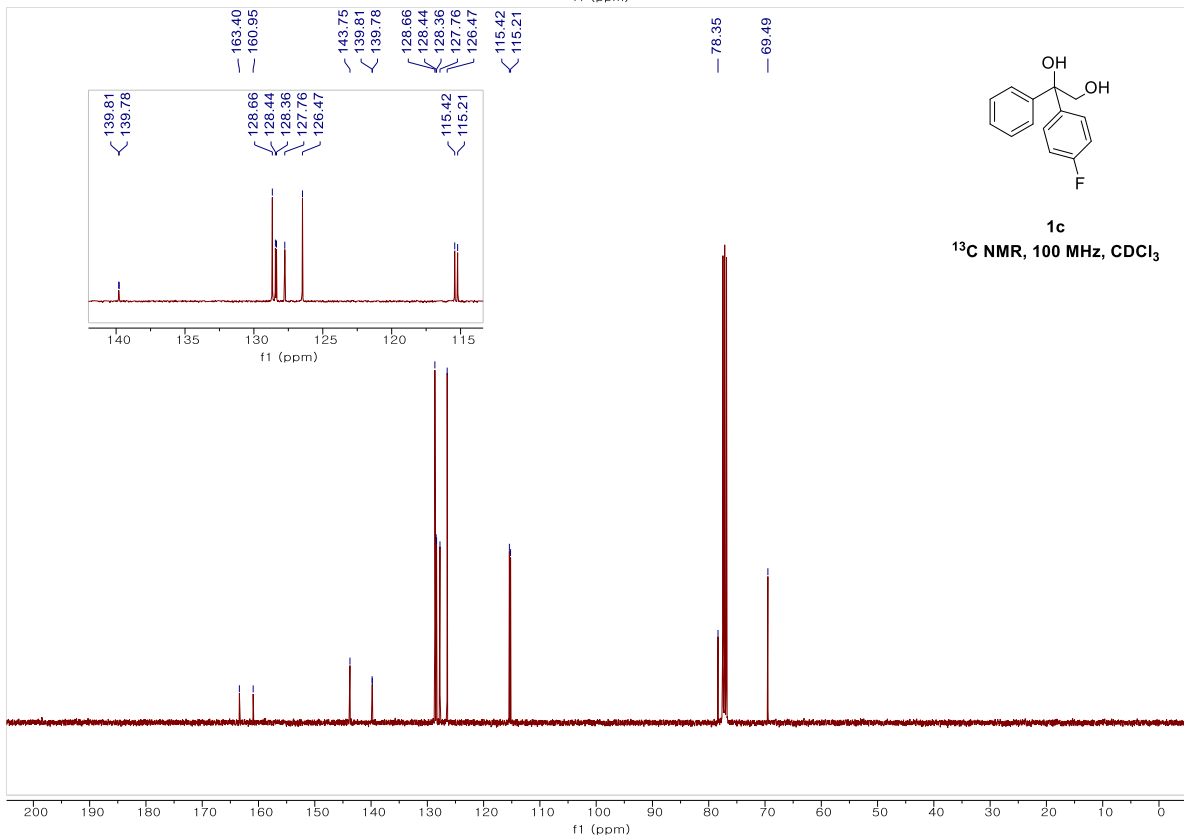

# 1-phenyl-1-(p-tolyl)ethane-1,2-diol (1d)

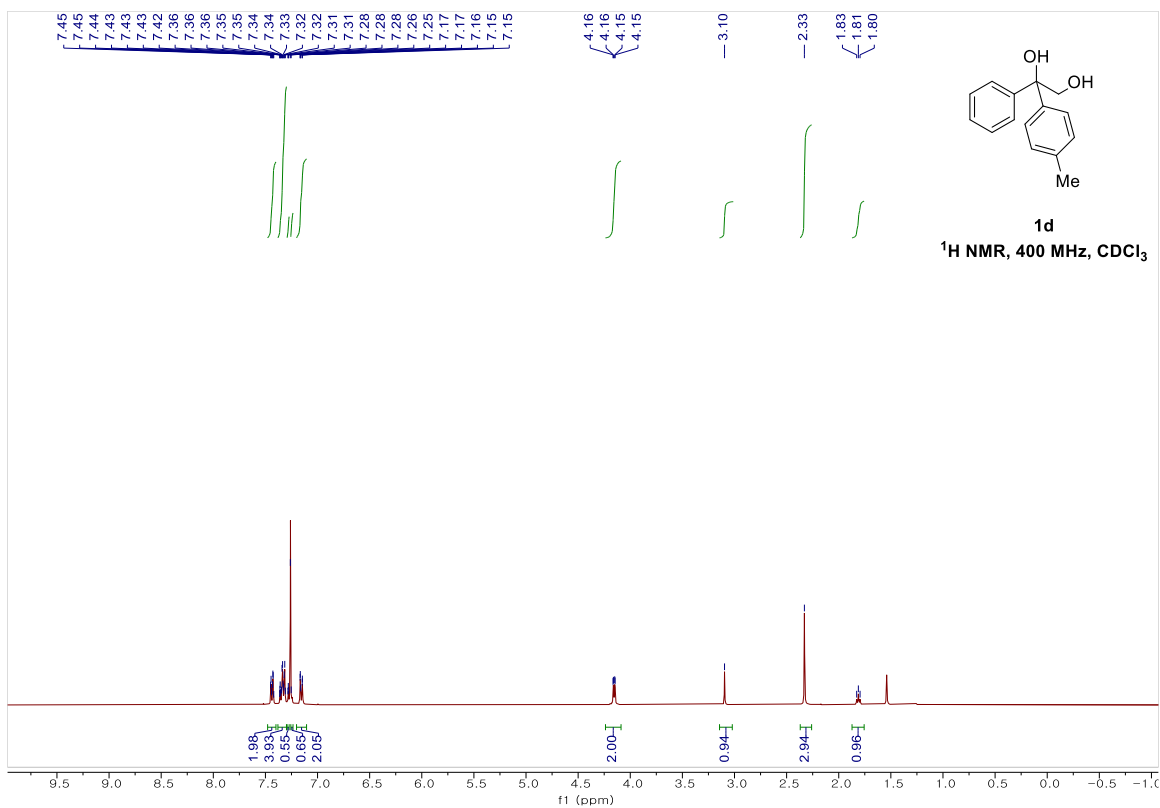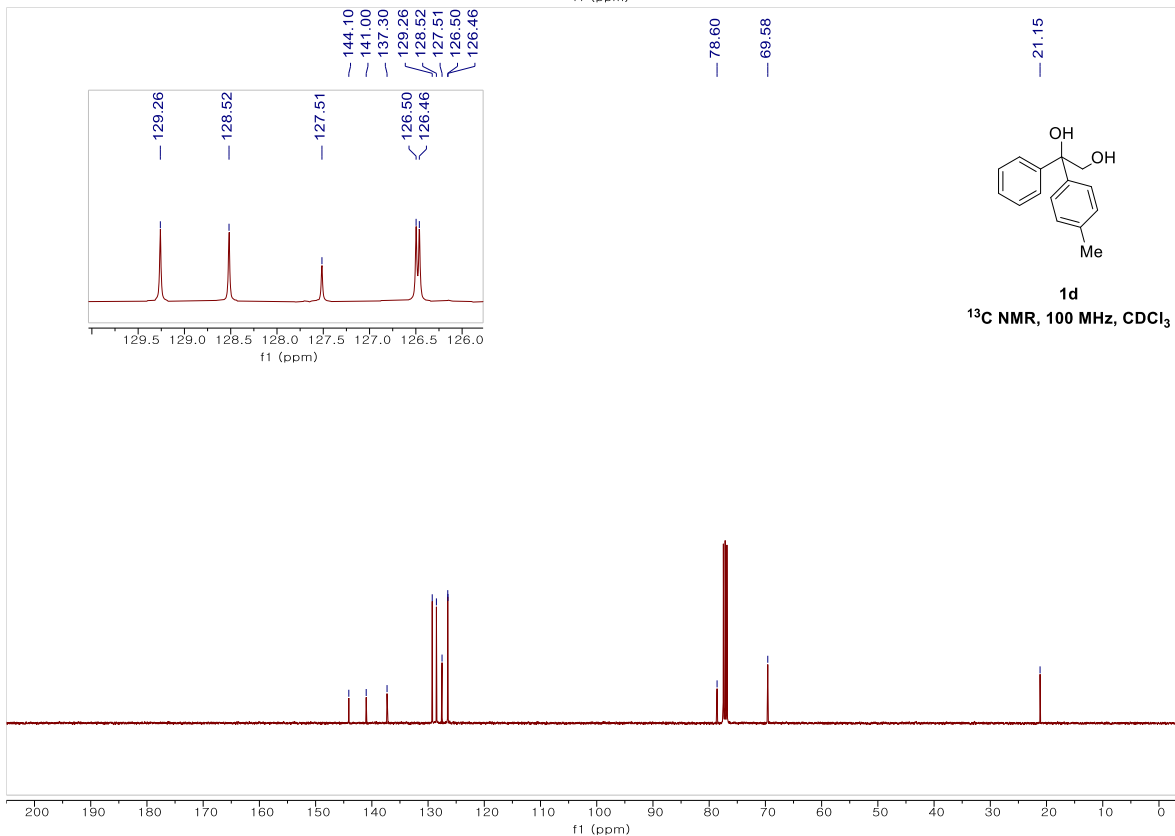

# 1-(4-methoxyphenyl)-1-phenylethane-1,2-diol (1e)

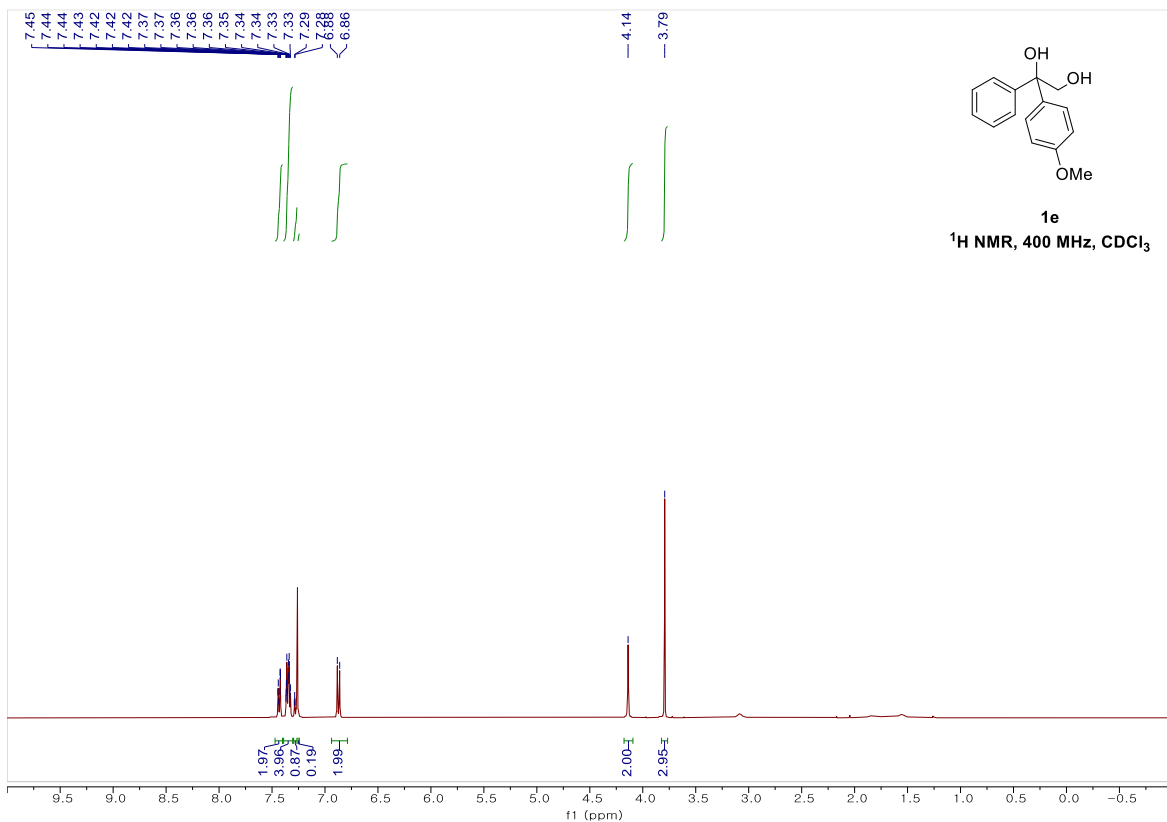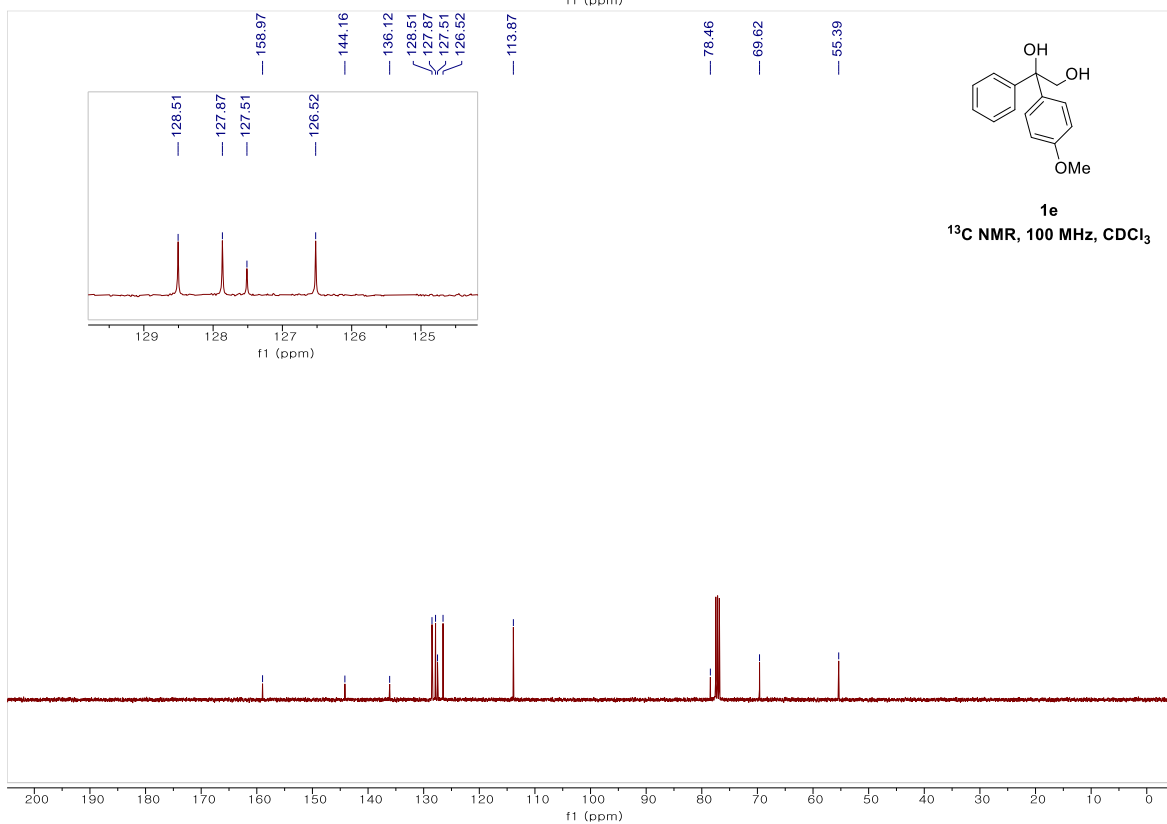

# 1-(4-((tert-butyldimethylsilyloxy)phenyl)-1-phenylethane-1,2-diol (1f)

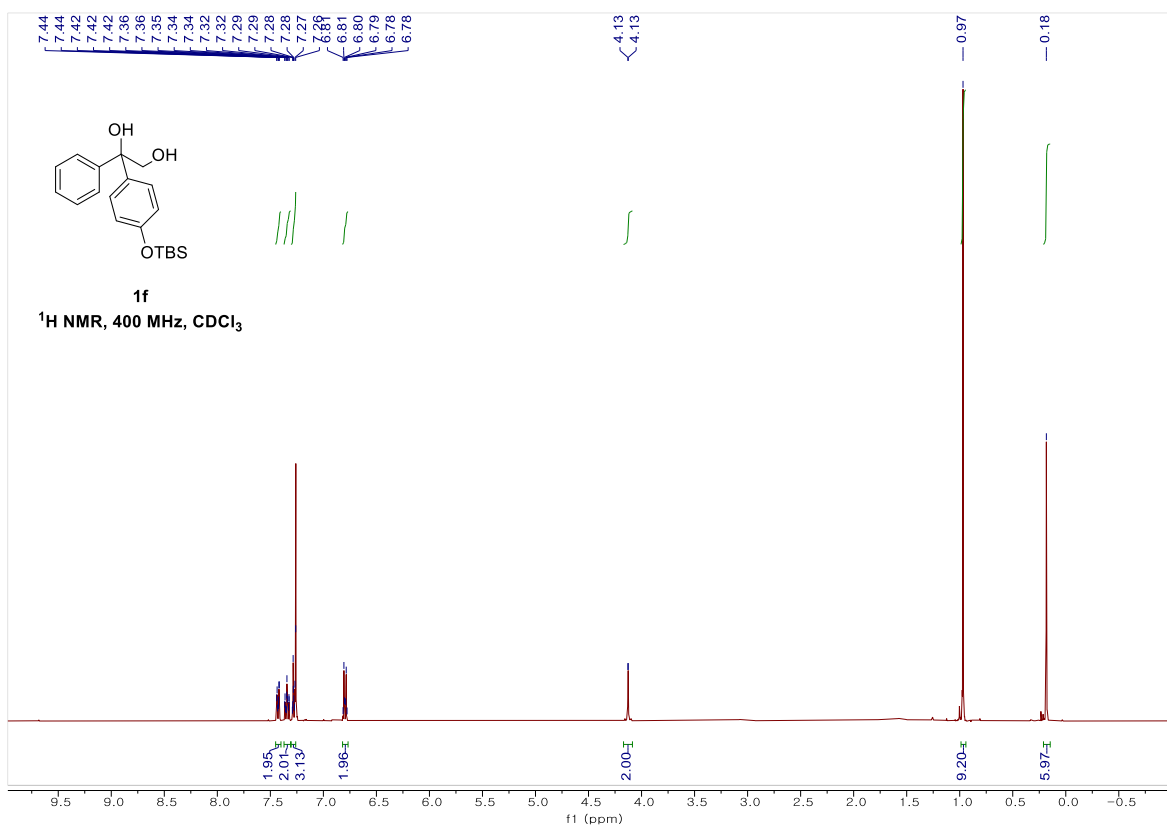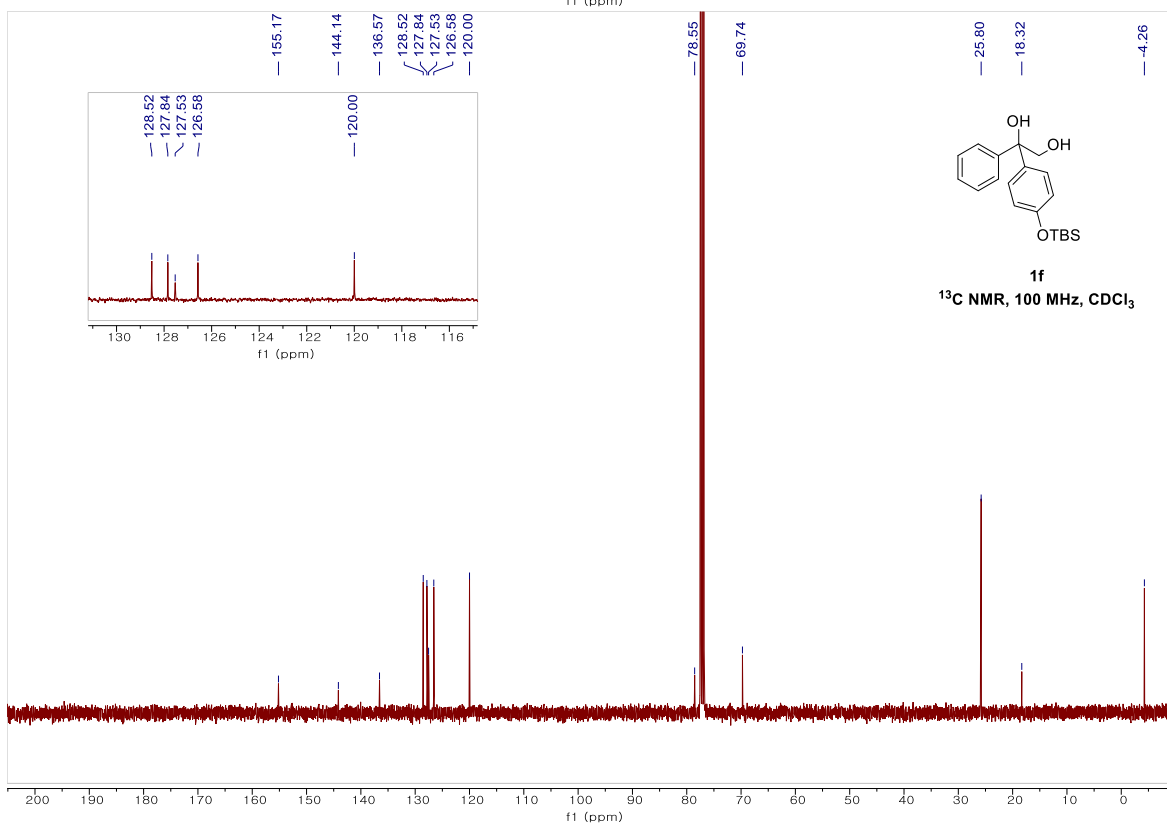

# 1-([1,1'-biphenyl]-4-yl)-1-phenylethane-1,2-diol (1g)

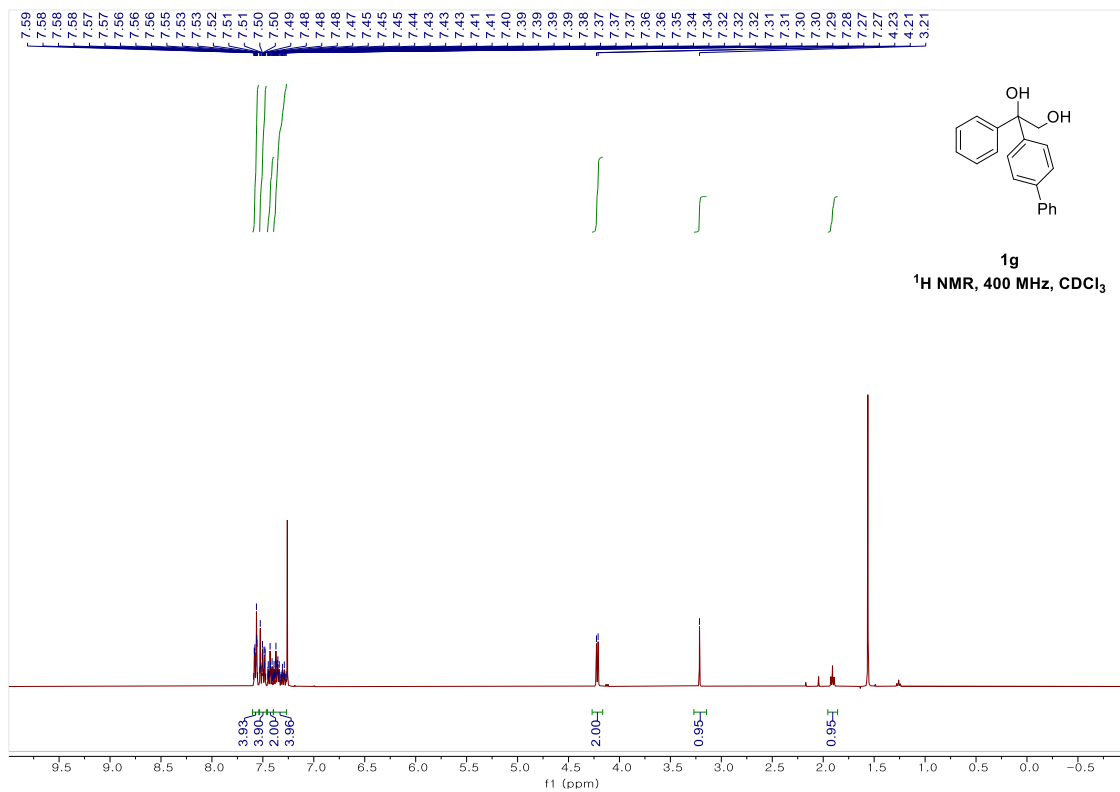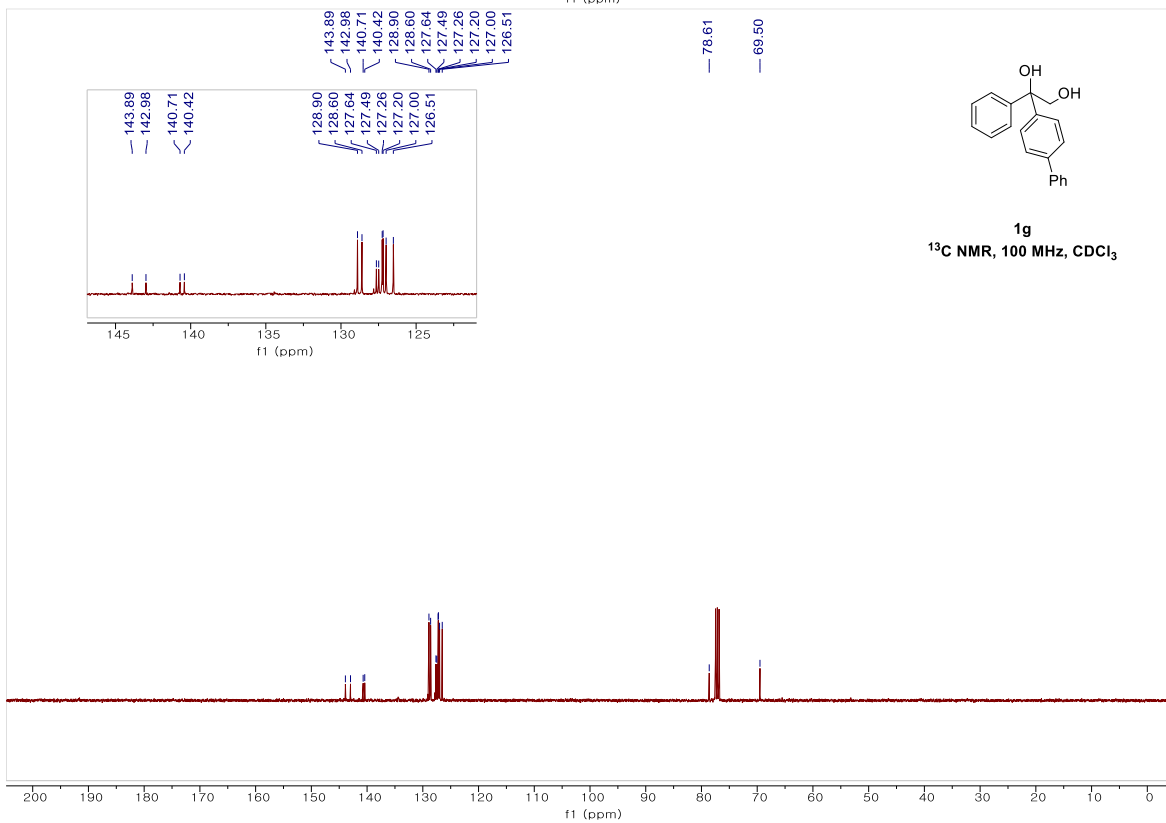

# 1-(2,6-dimethylphenyl)-1-phenylethane-1,2-diol (1h)

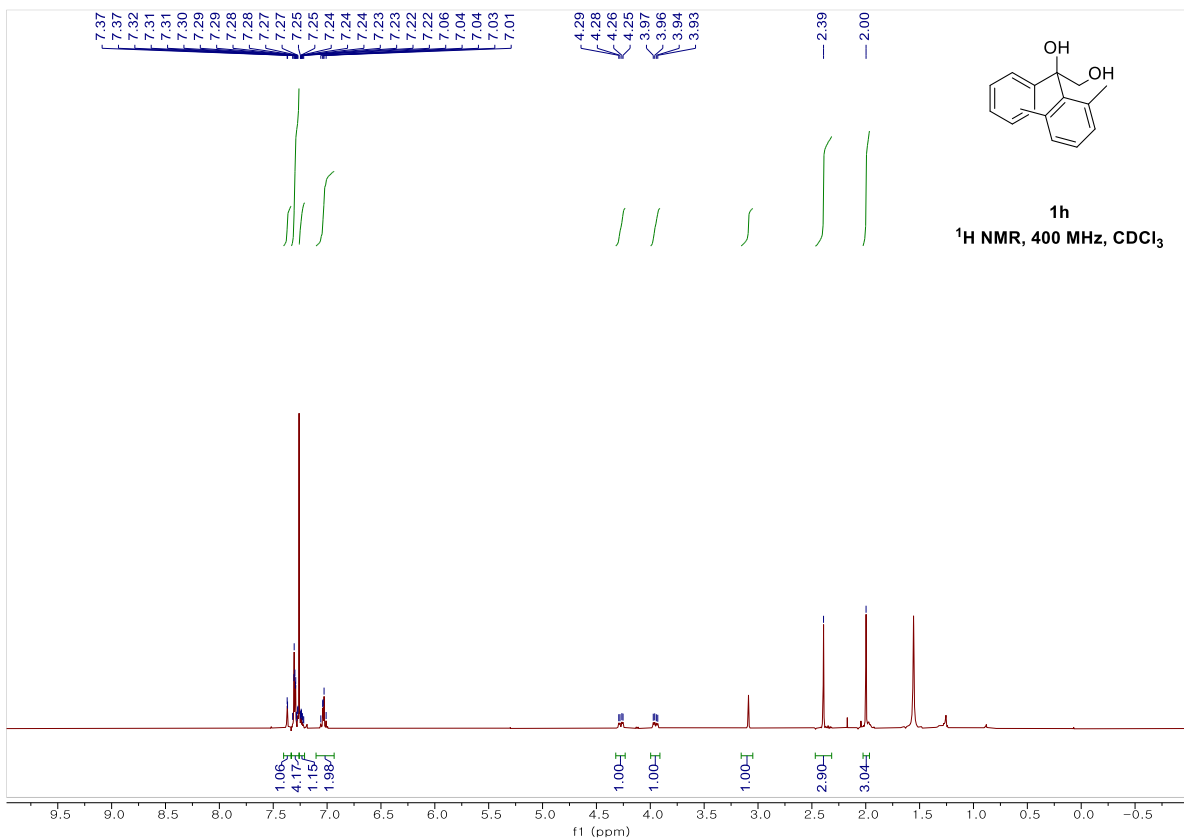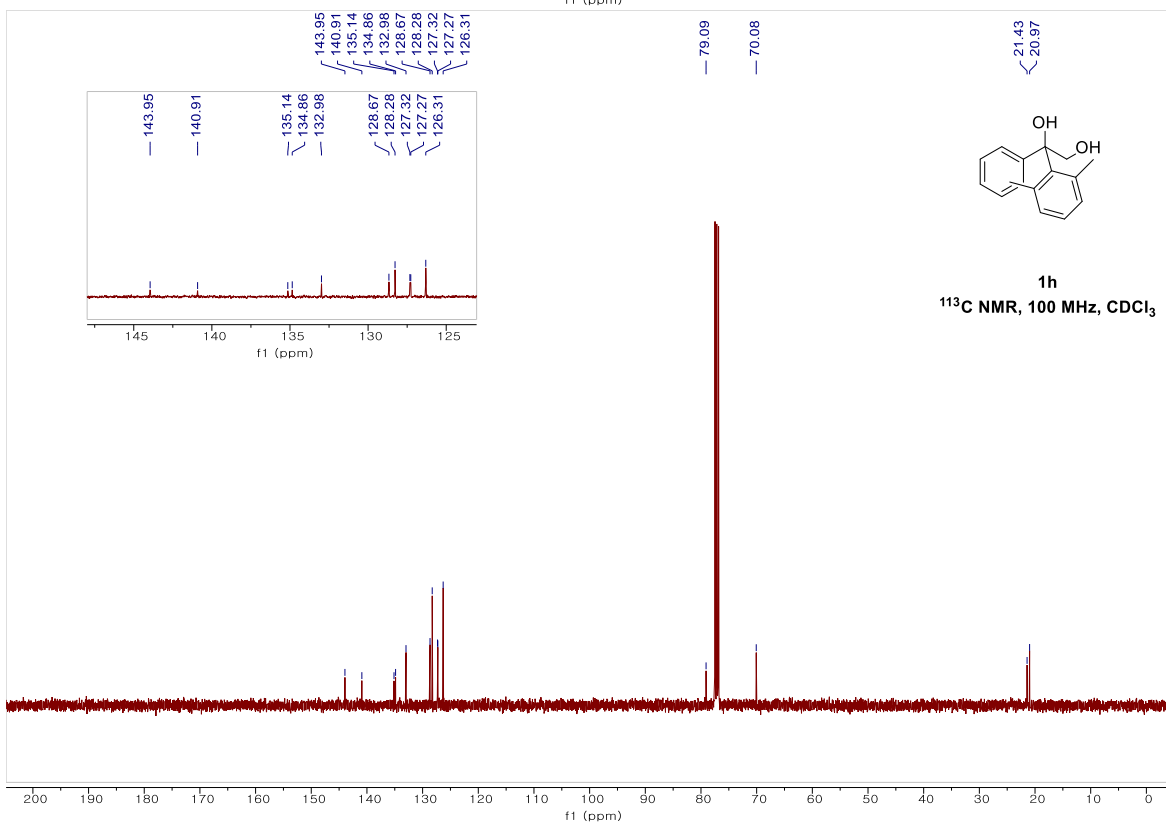

# 1-(naphthalen-2-yl)-1-phenylethane-1,2-diol (1i)

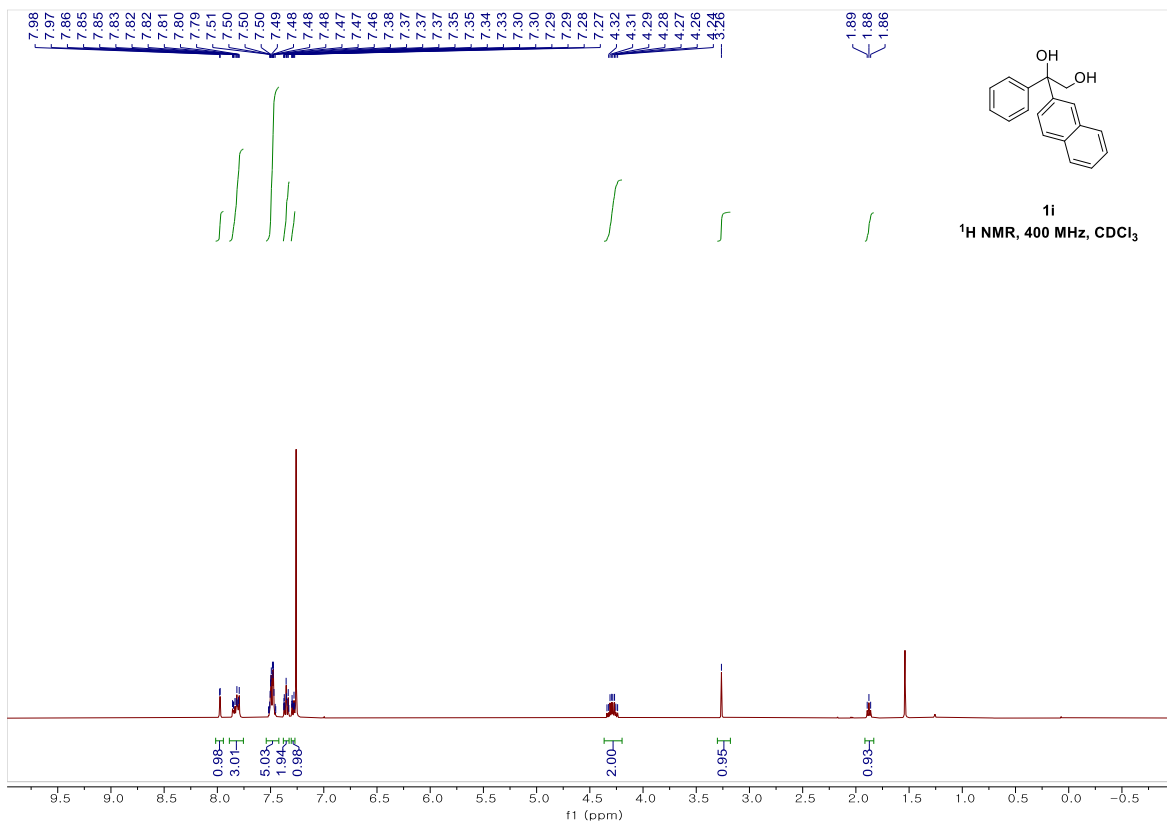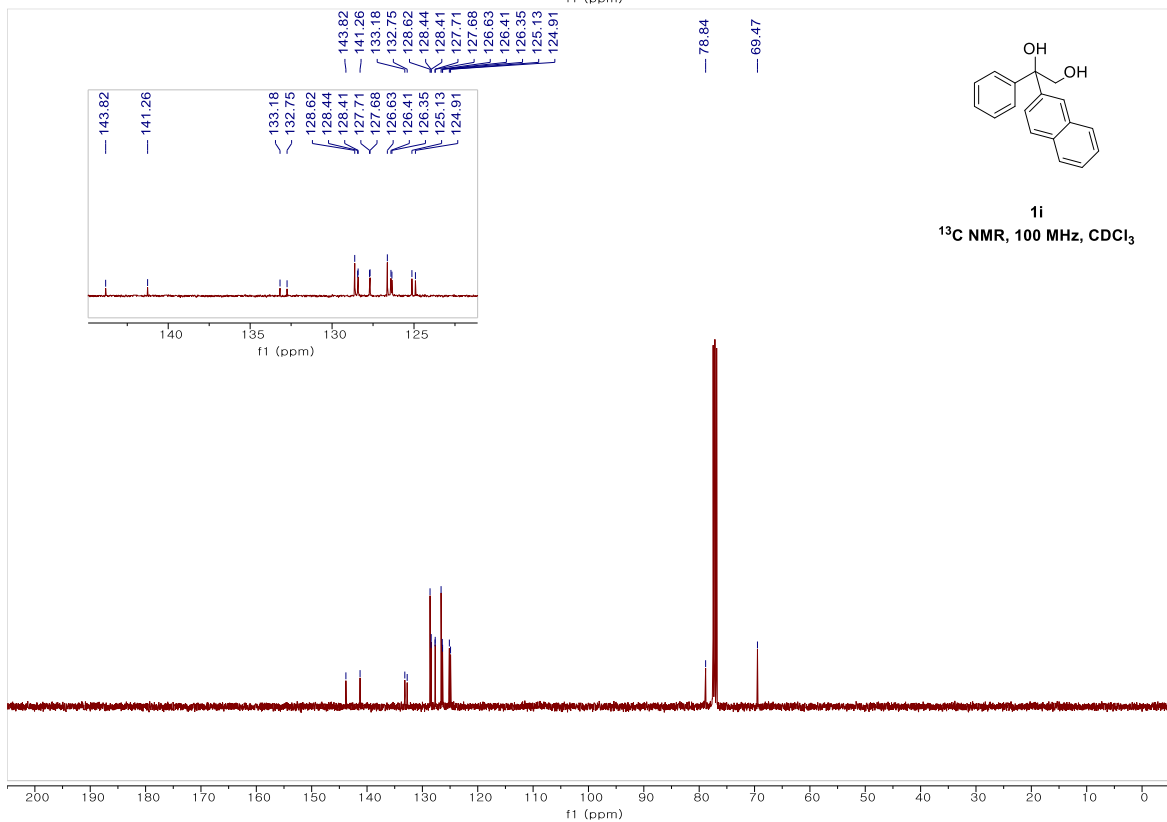

### 1-phenyl-1-(thiophen-2-yl)ethane-1,2-diol (1j)

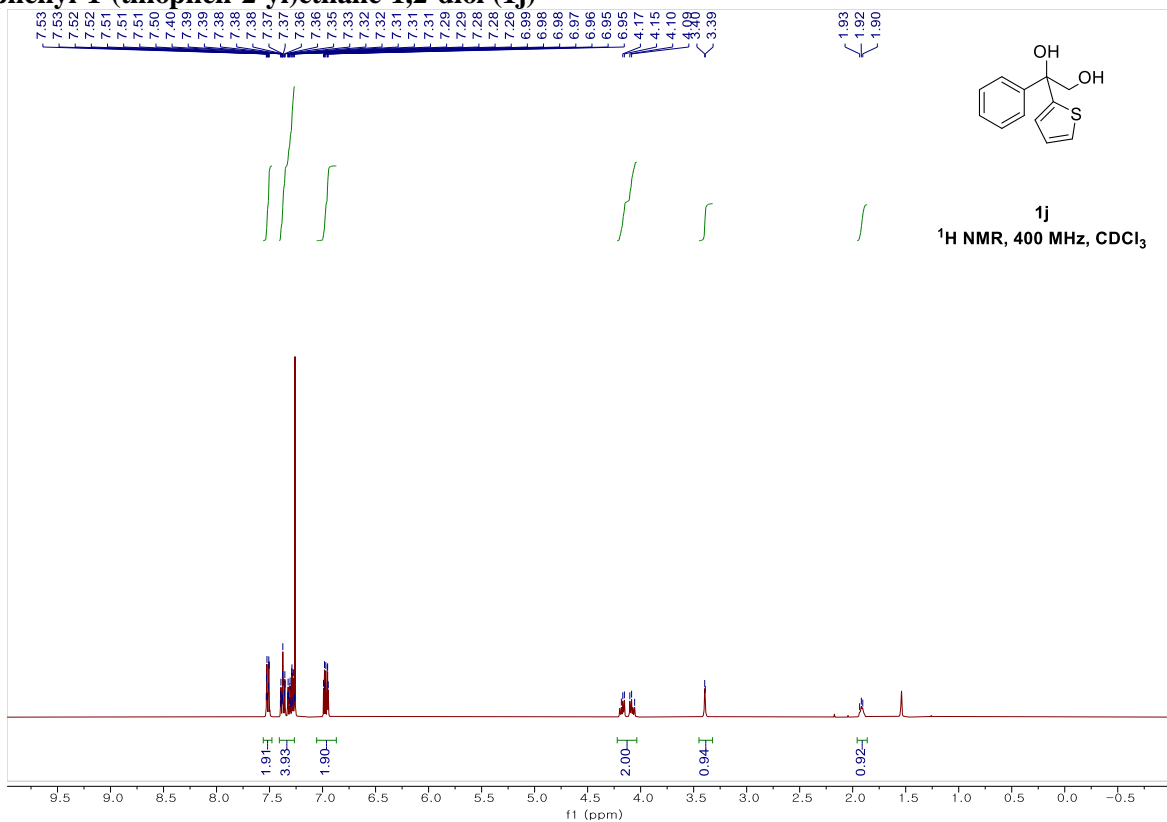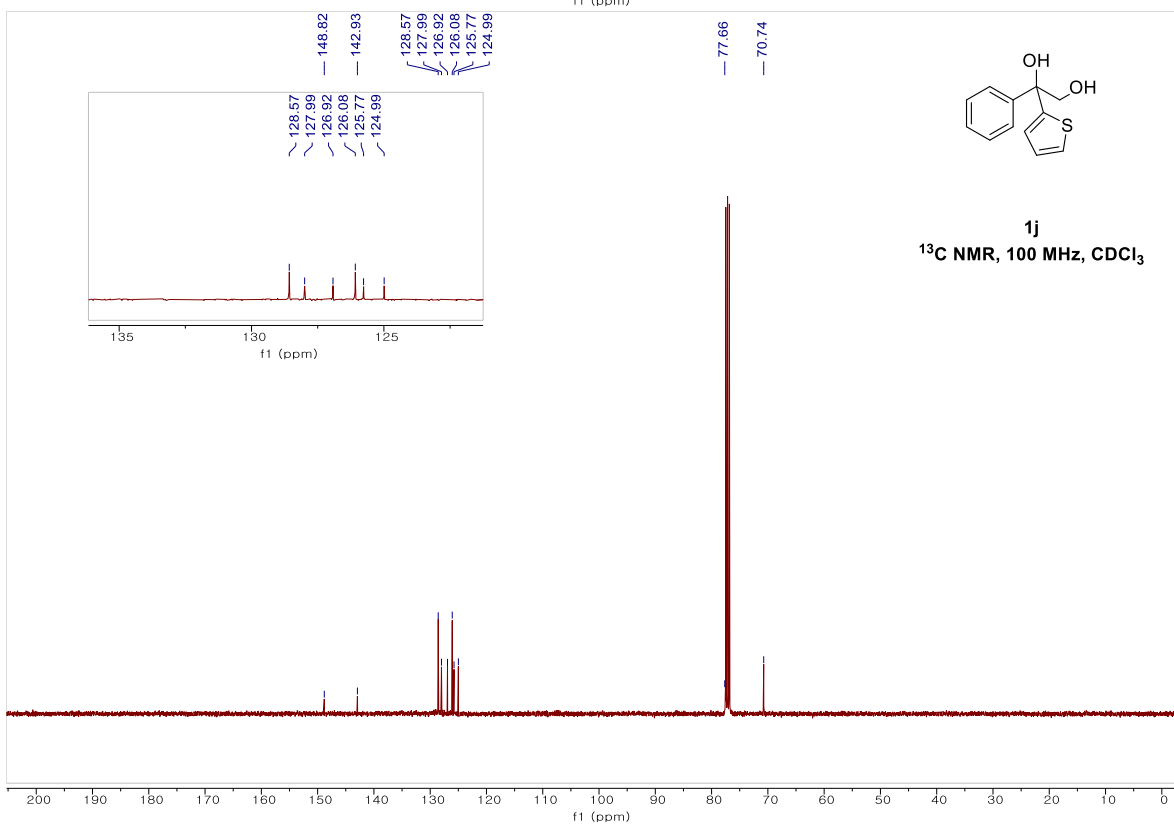

## 2-phenylpropane-1,2-diol (1k)

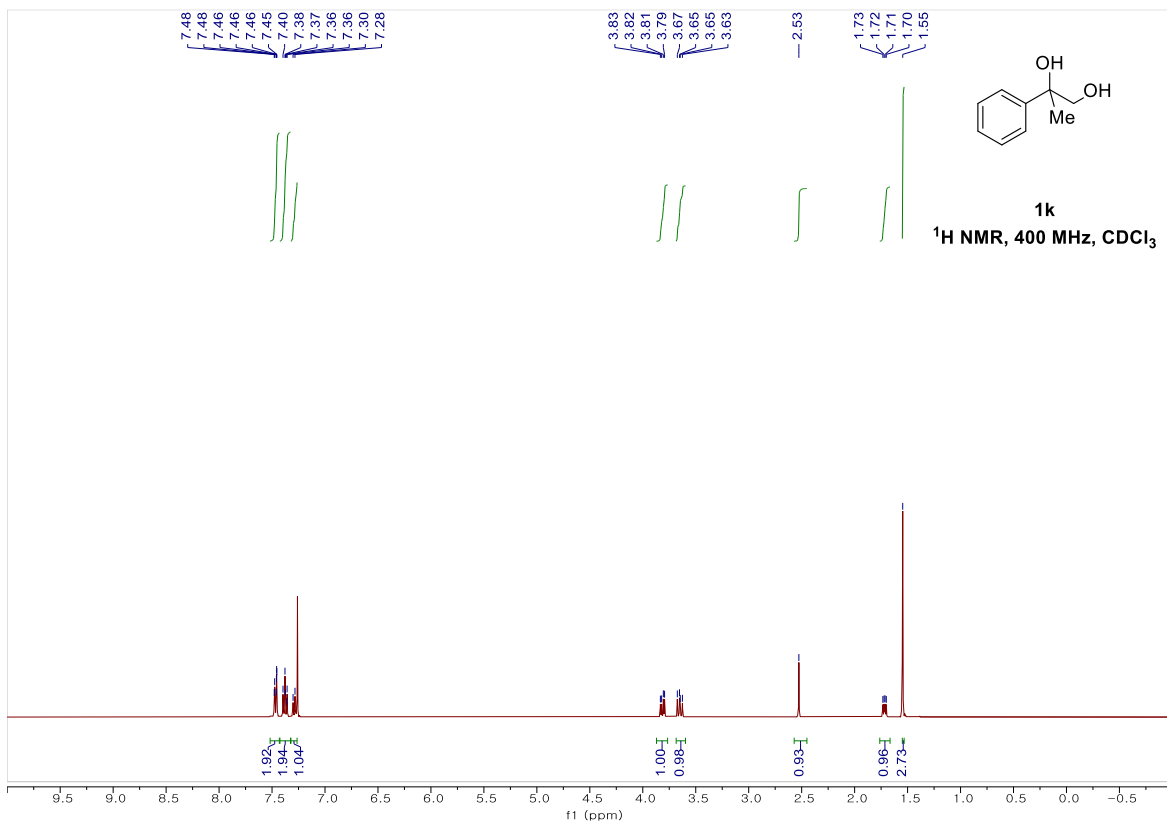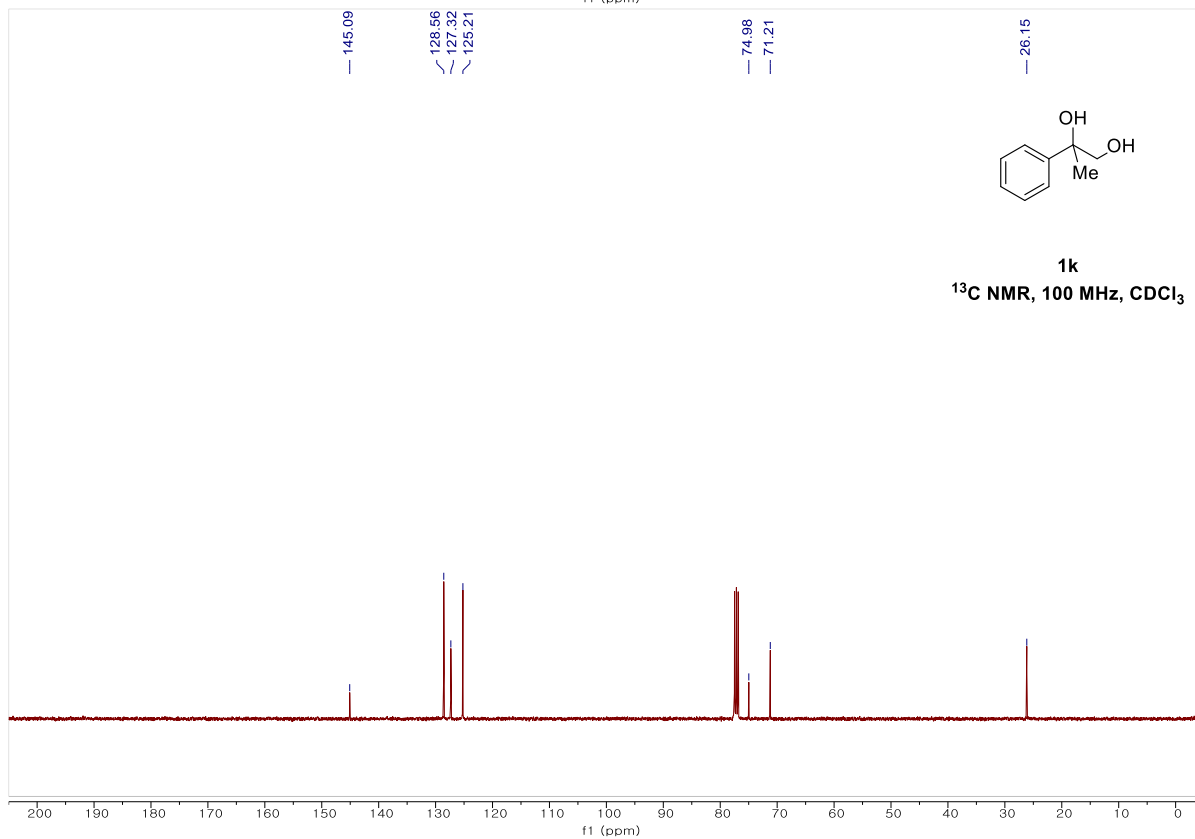

## 2-(4-hydroxyphenyl)propane-1,2-diol (11)

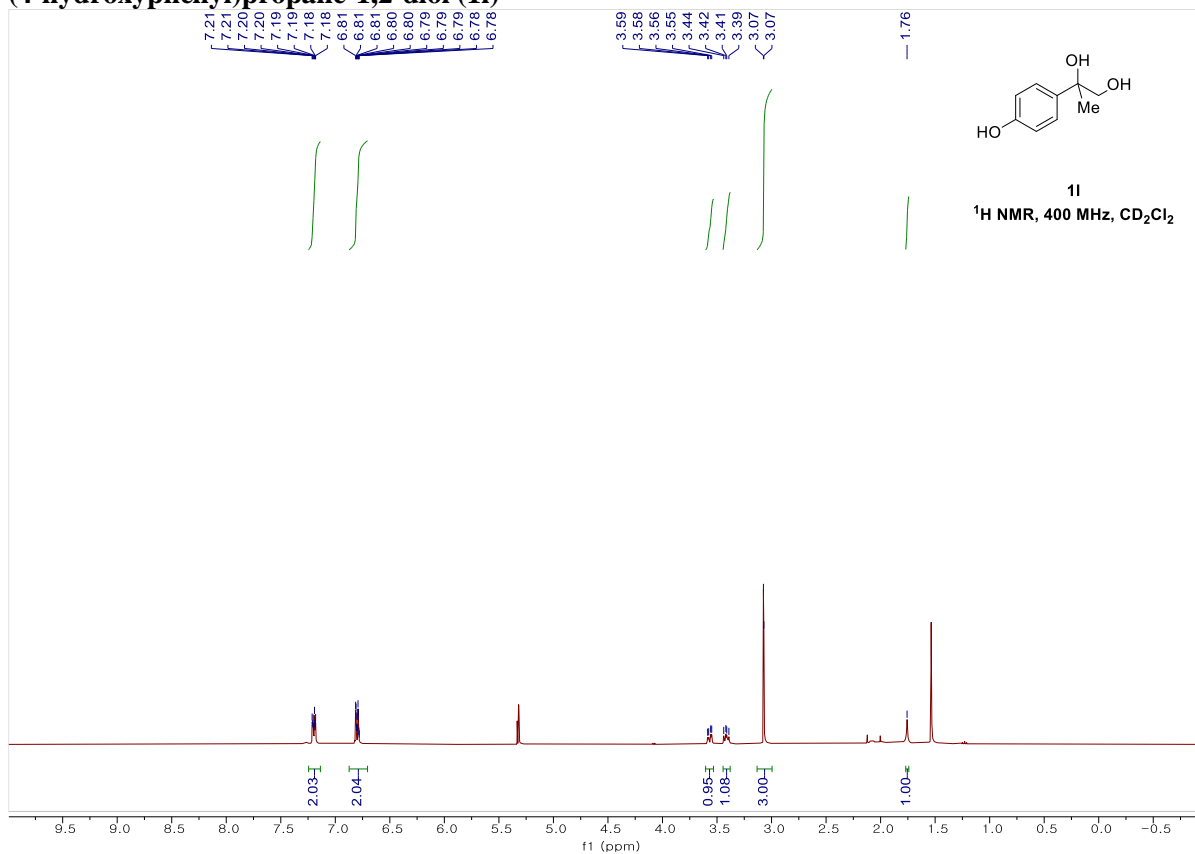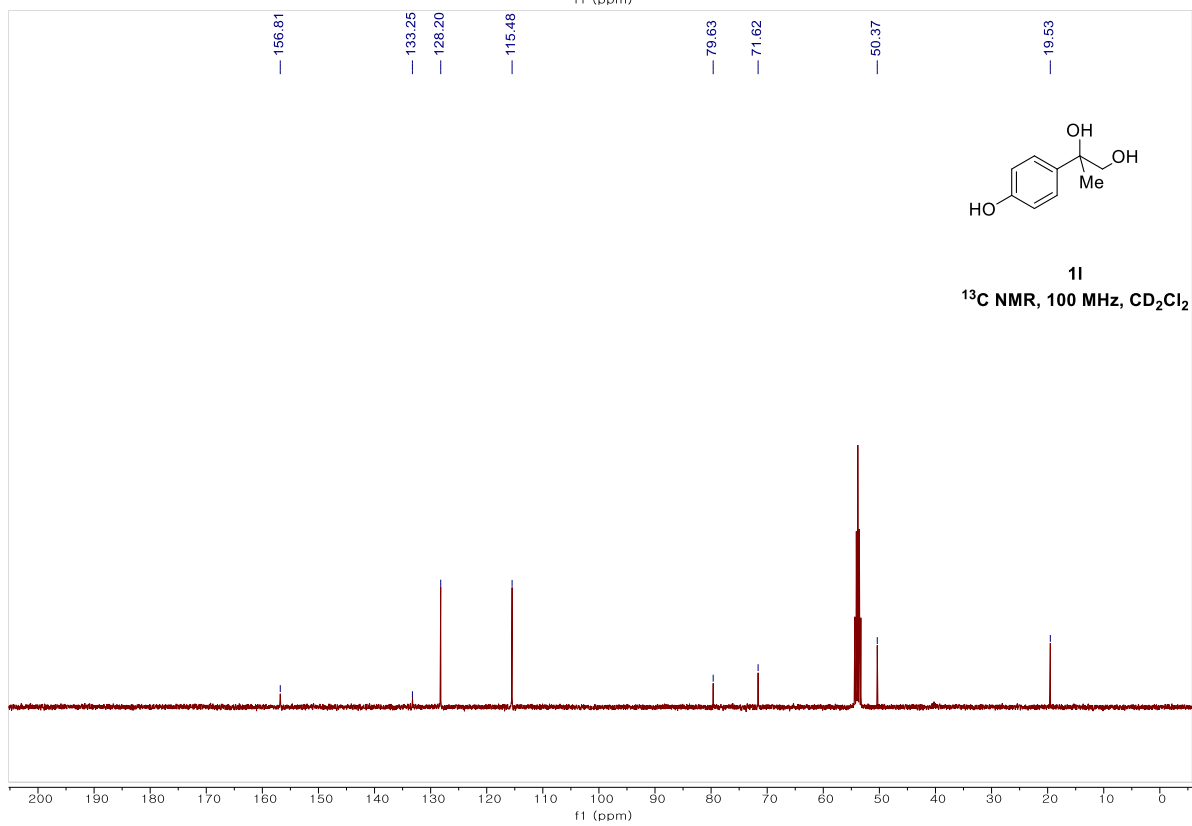

## 2-phenylbutane-1,2-diol (1m)

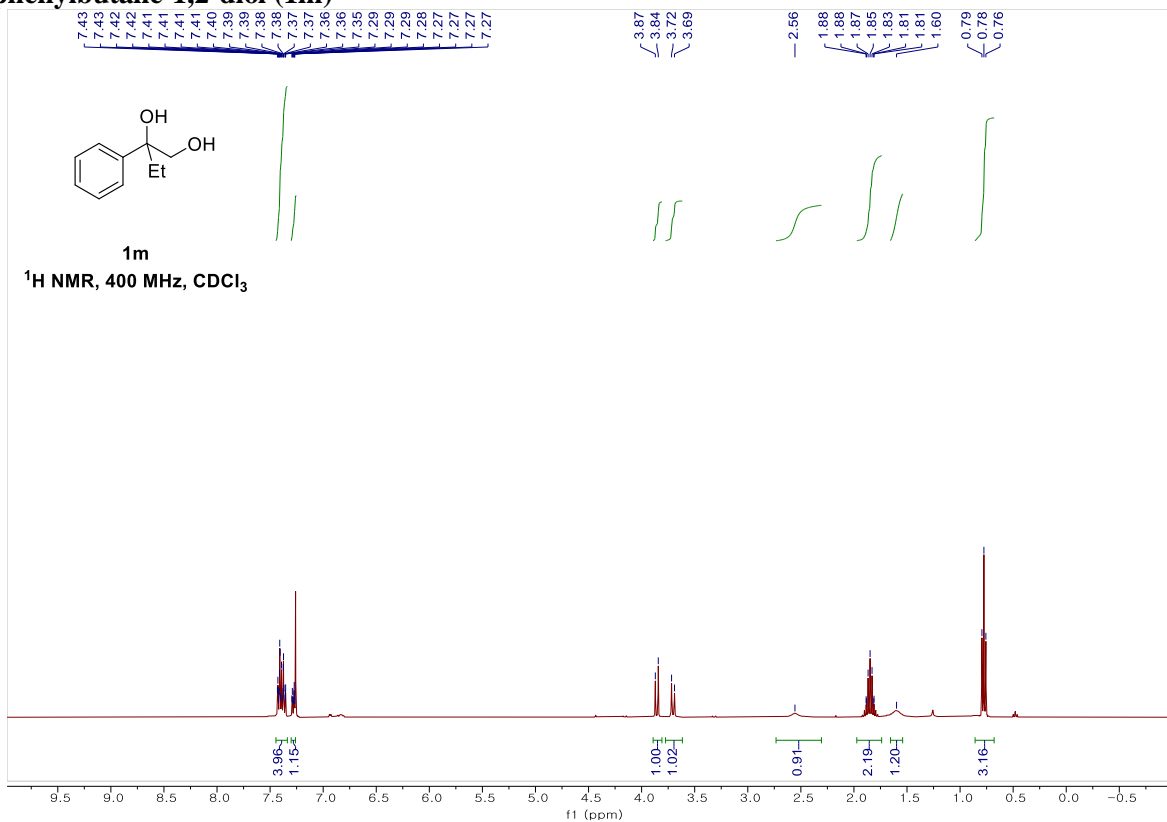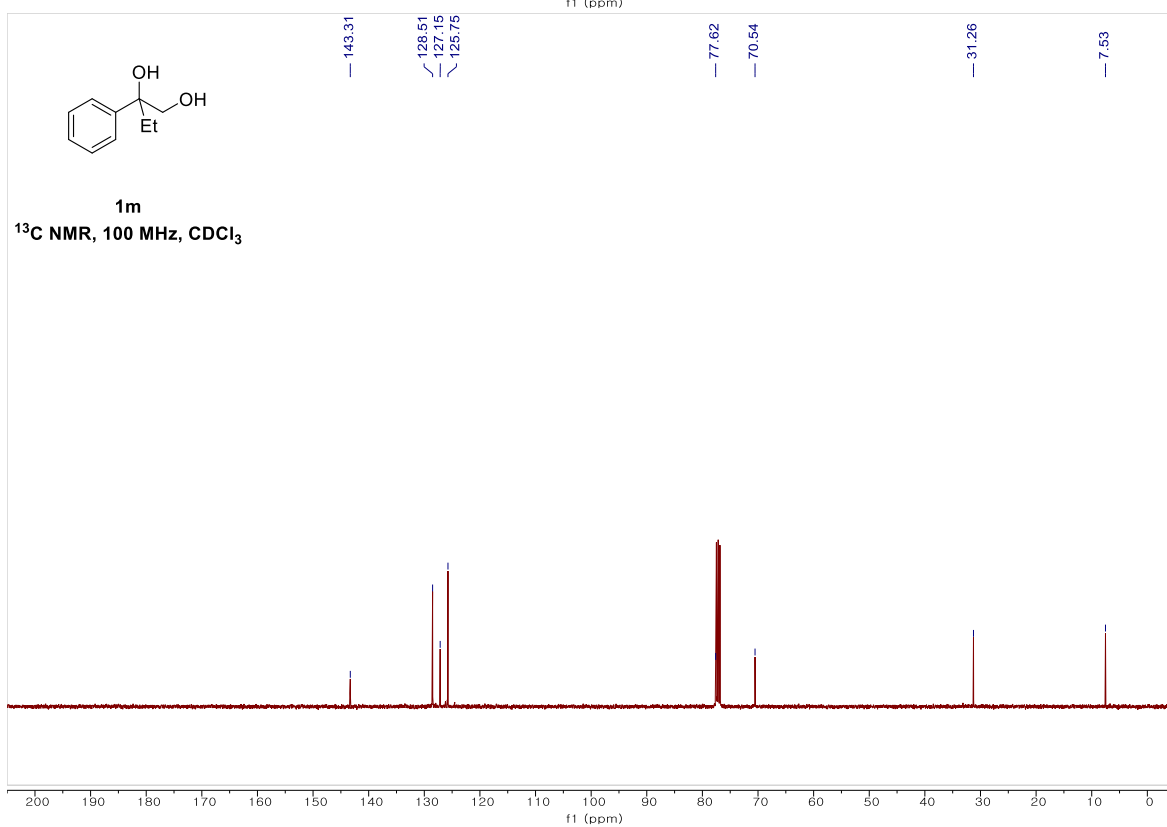

## 2,3-diphenylpropane-1,2-diol (**1n**)

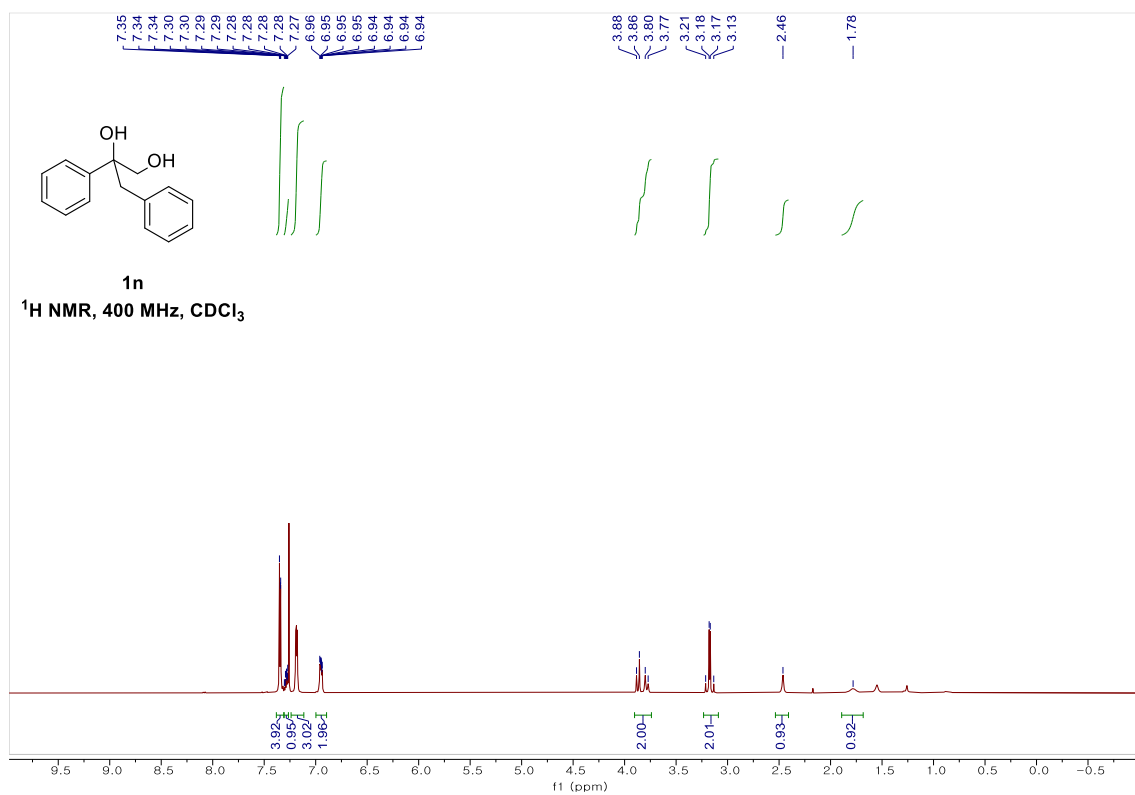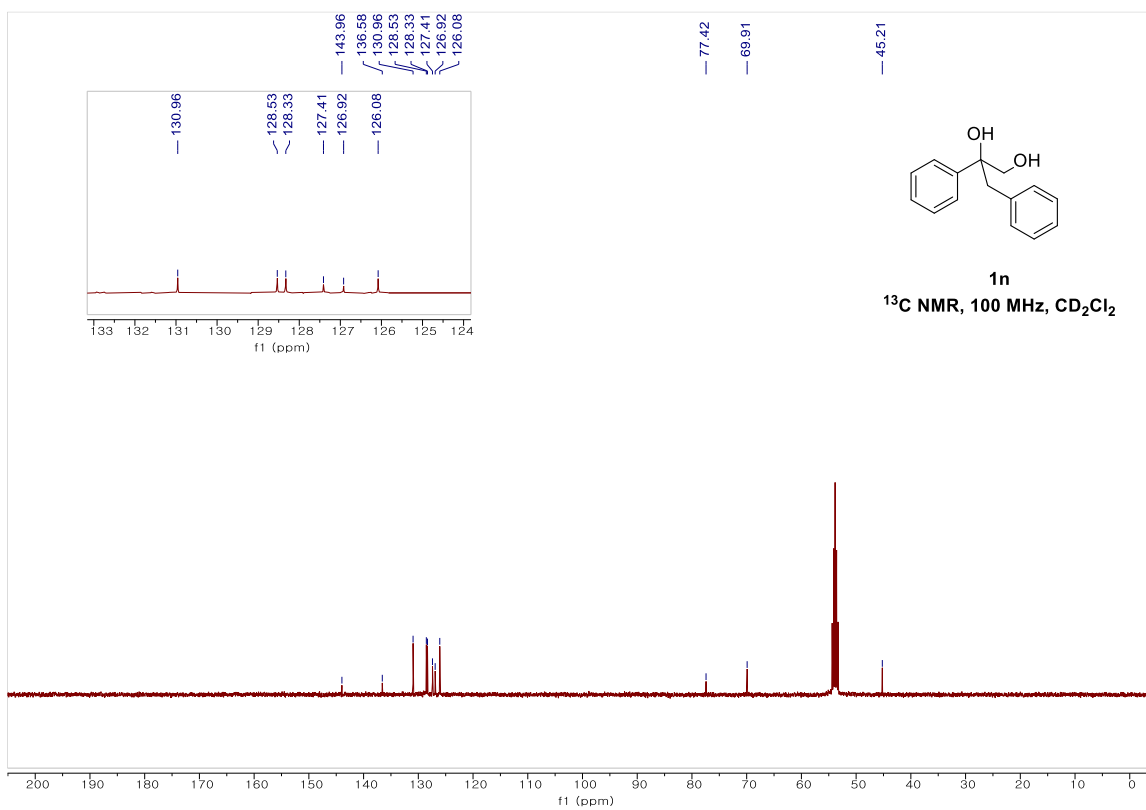

## 2-methyl-4-phenylbutane-1,2-diol (1o)

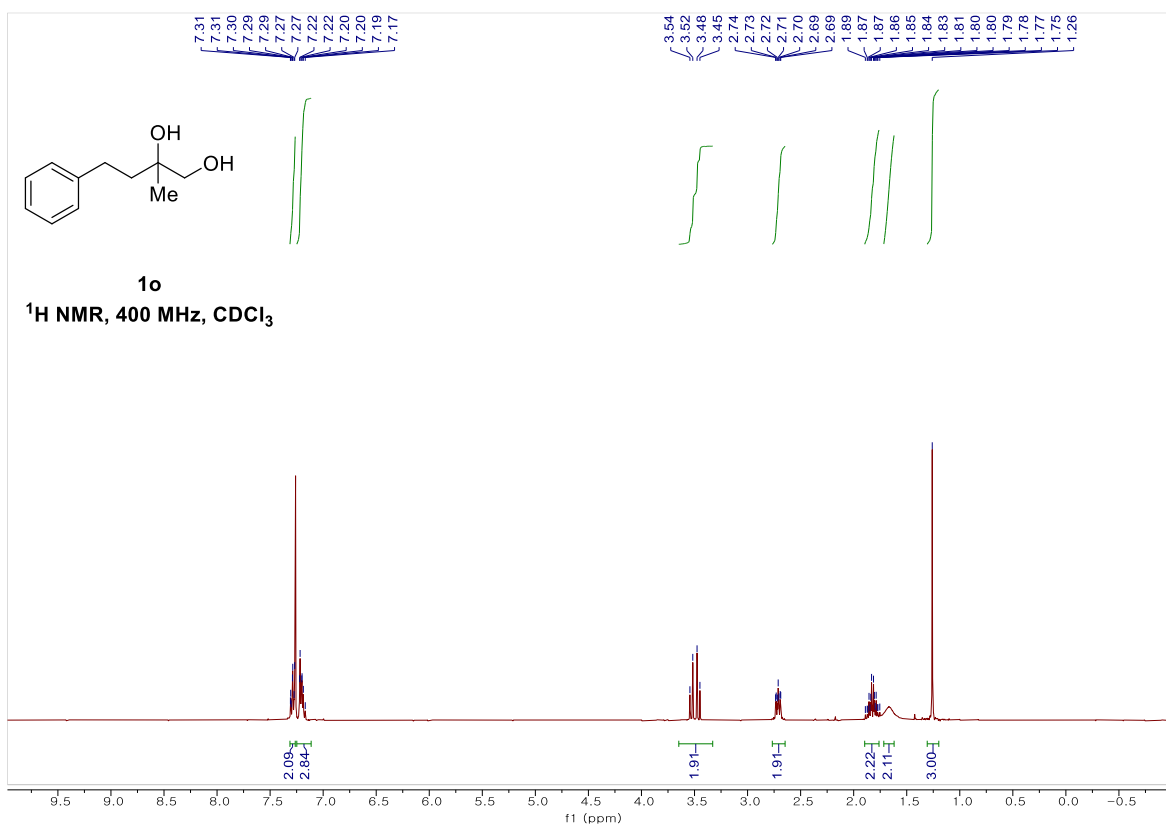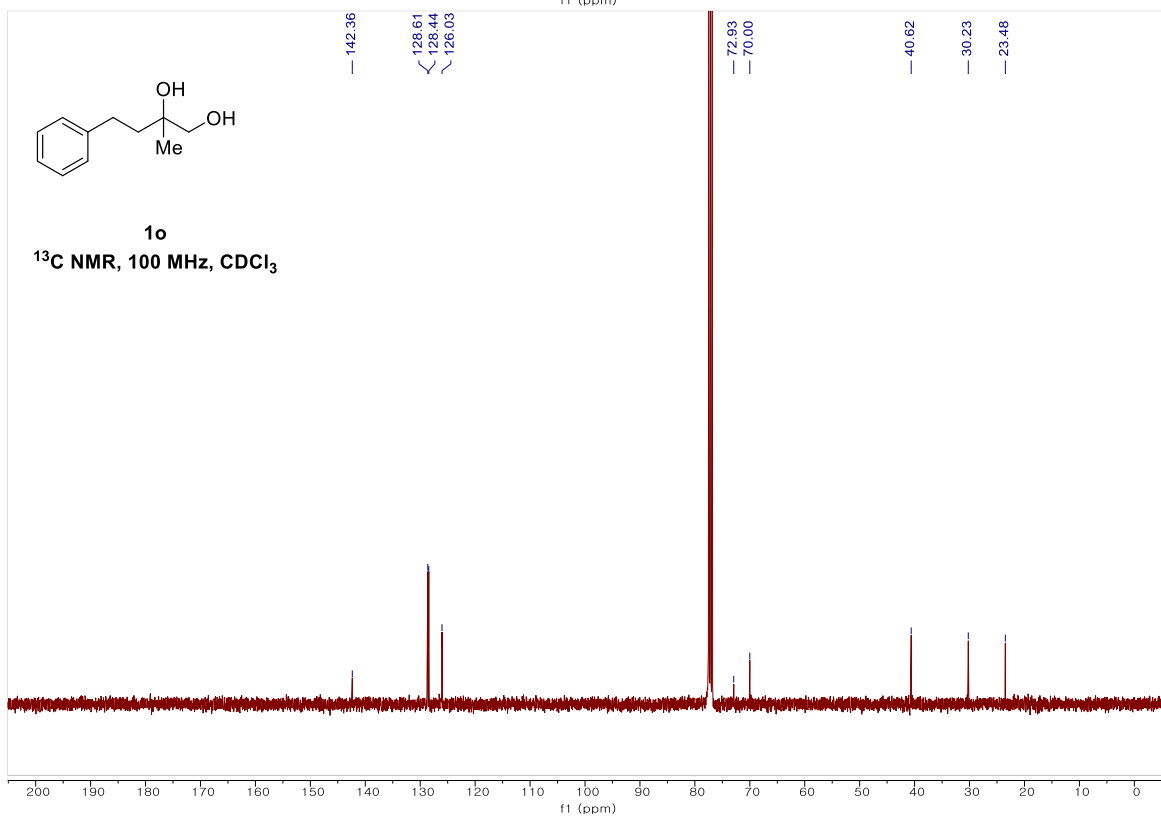

## 2-ethyl-4-phenylbutane-1,2-diol (1p)

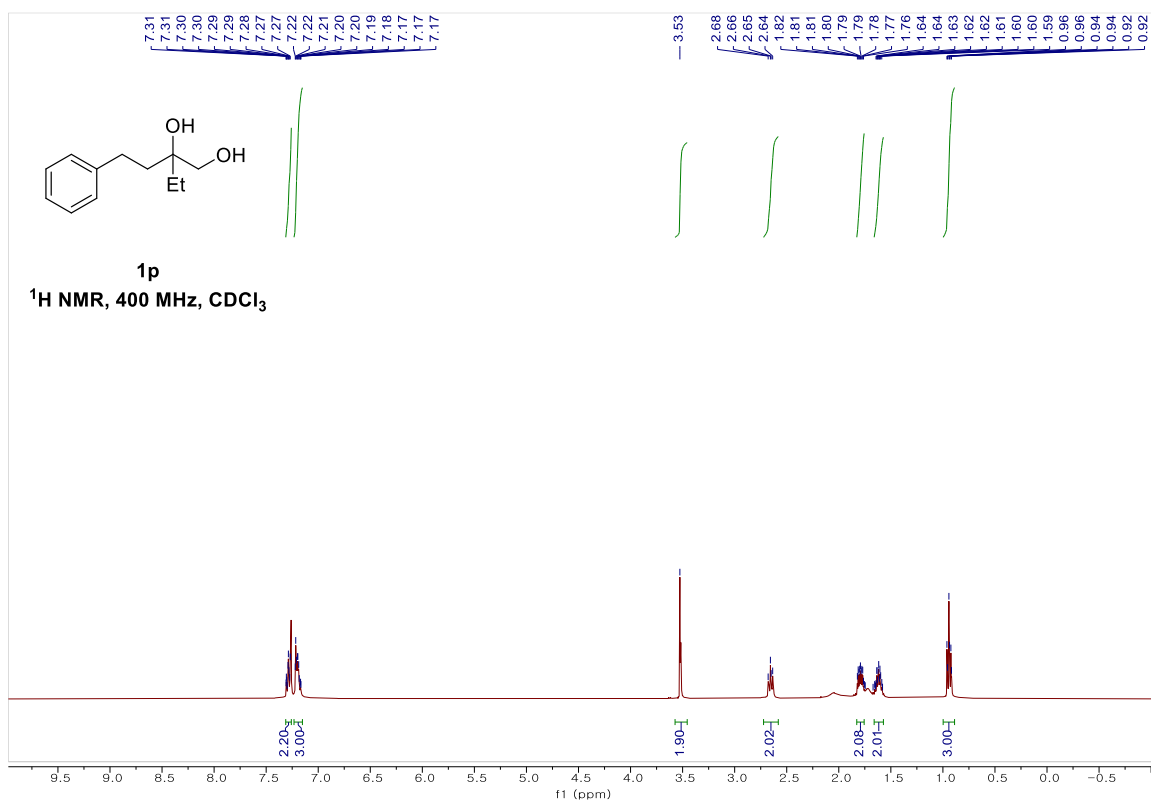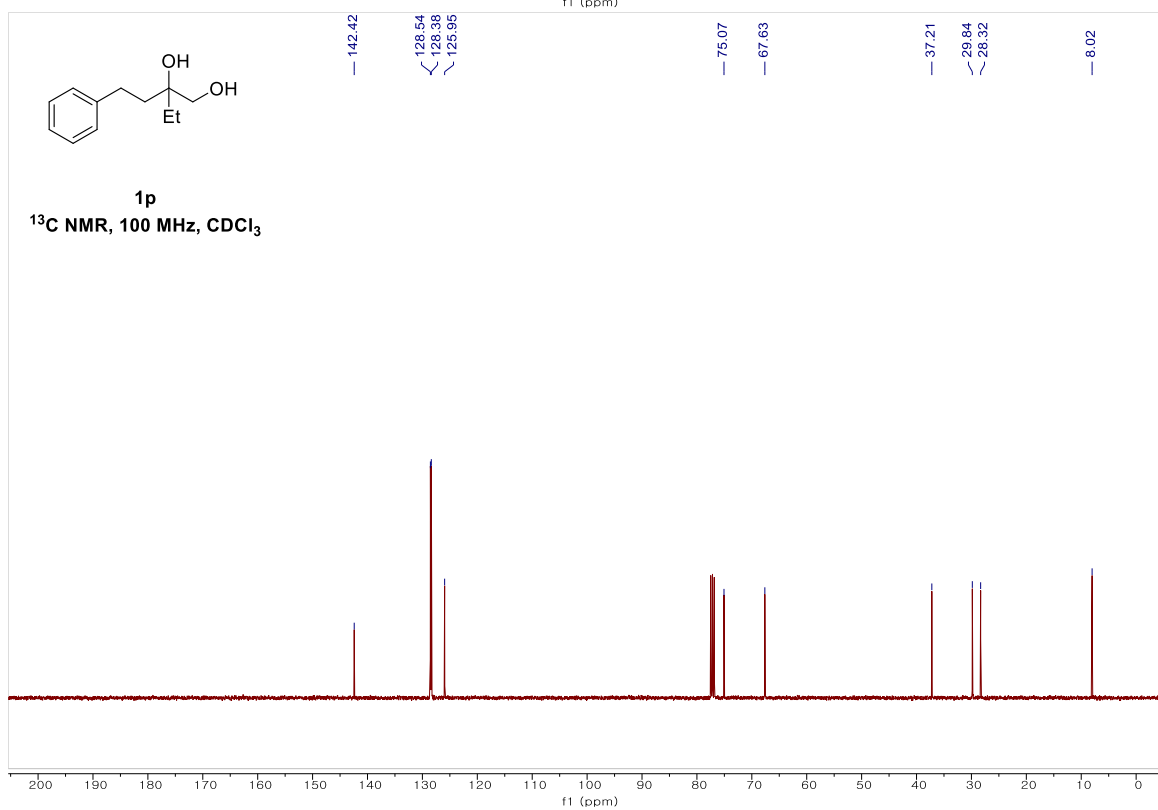

## 2-benzyl-4-phenylbutane-1,2-diol (1q)

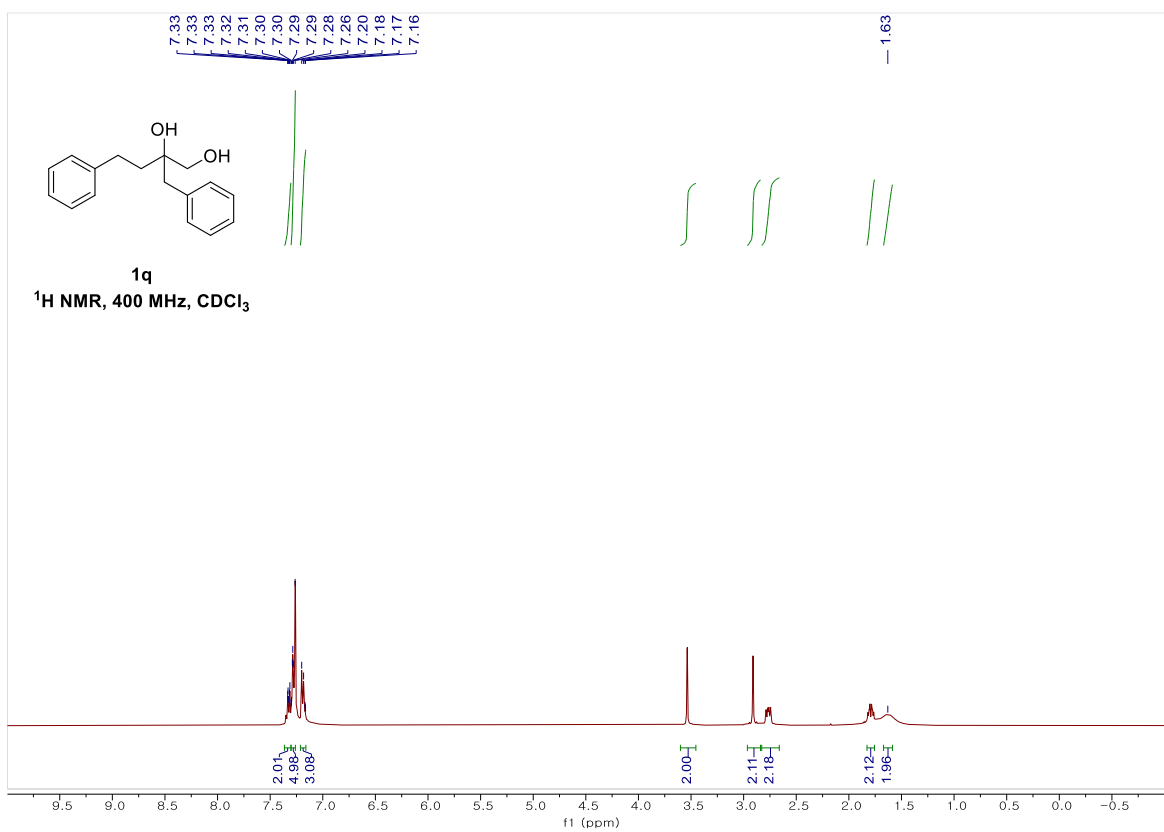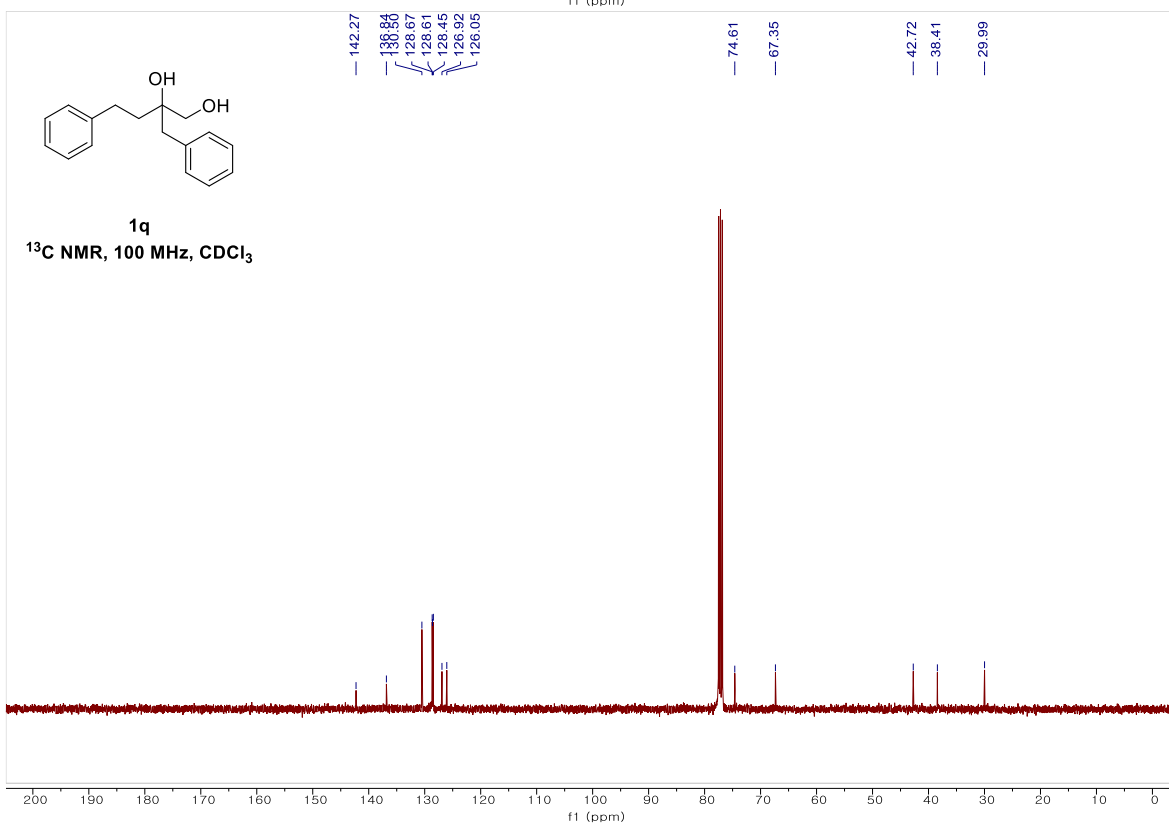

## 2-phenethylbut-3-ene-1,2-diol (1r)

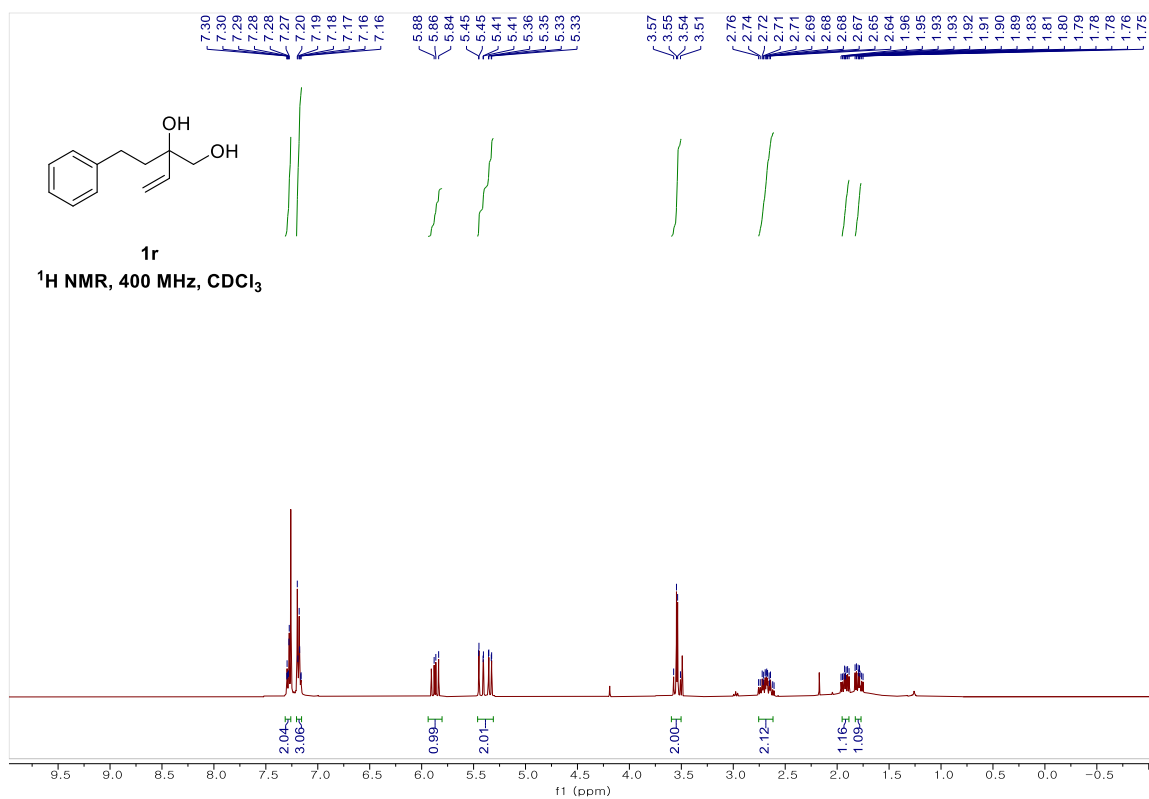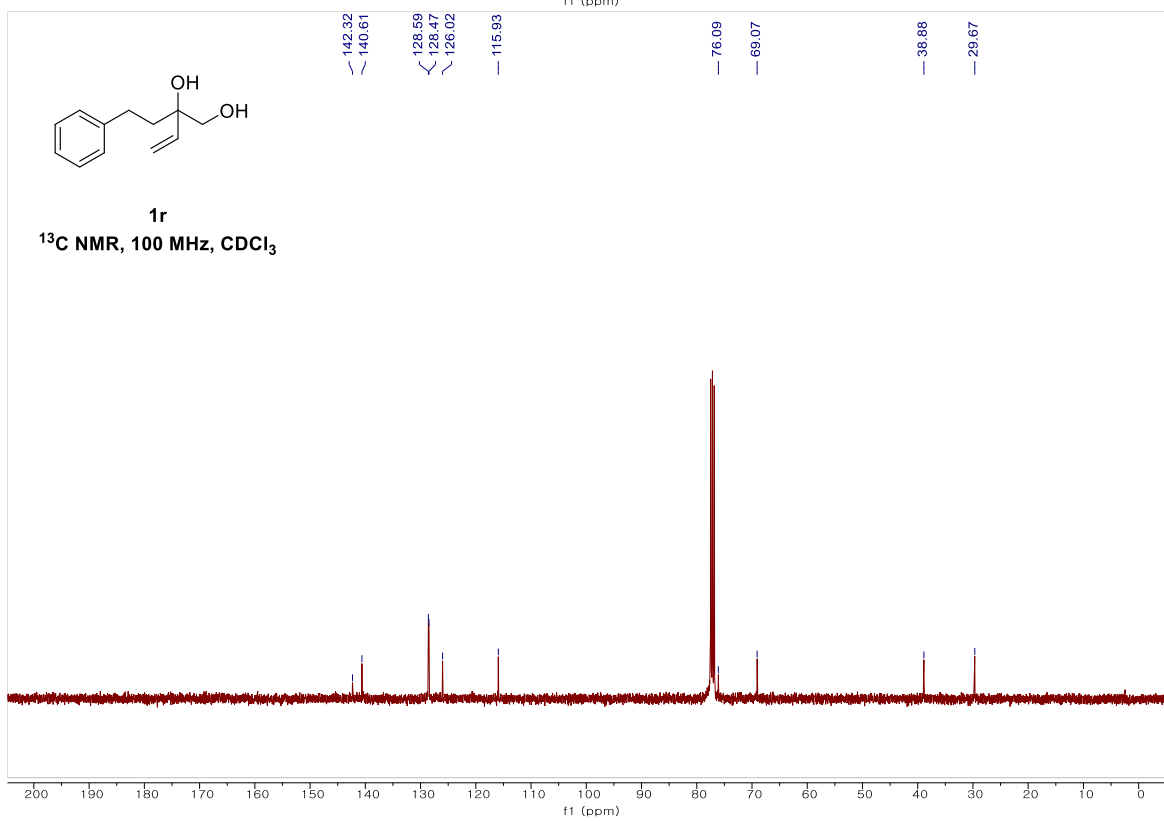

## 2-phenethylpent-4-ene-1,2-diol (1s)

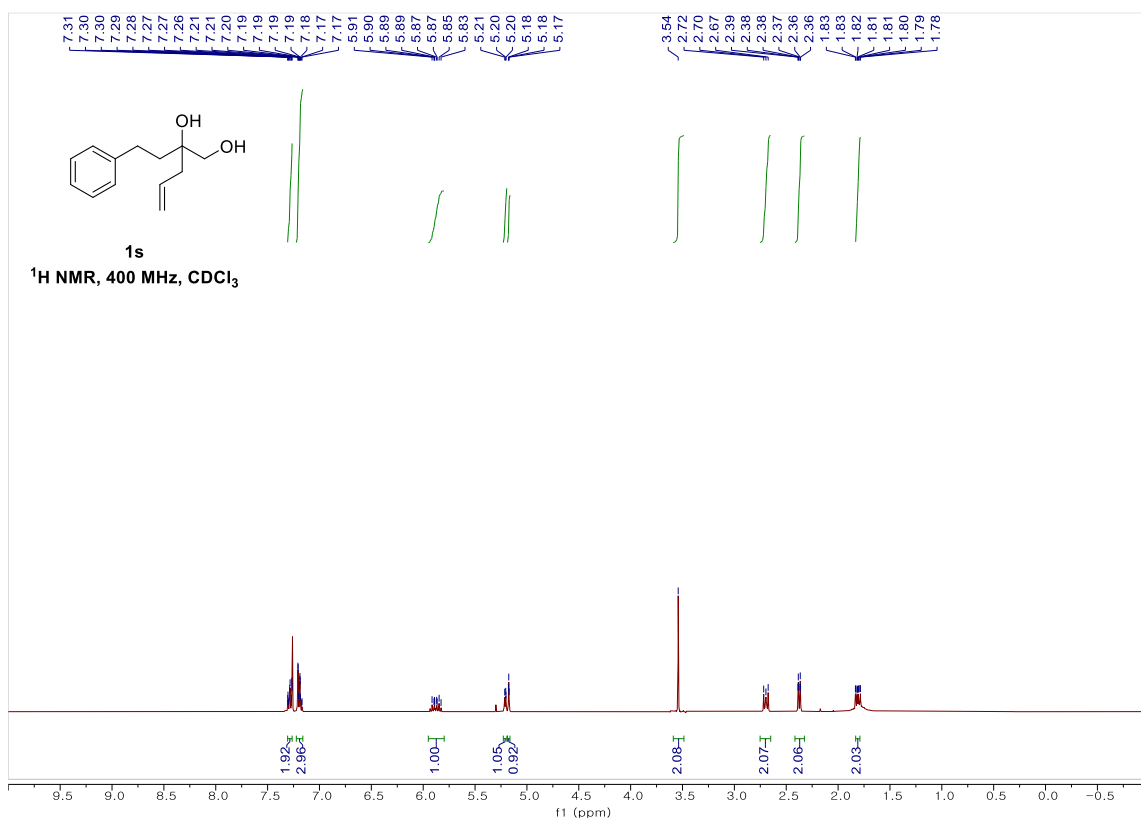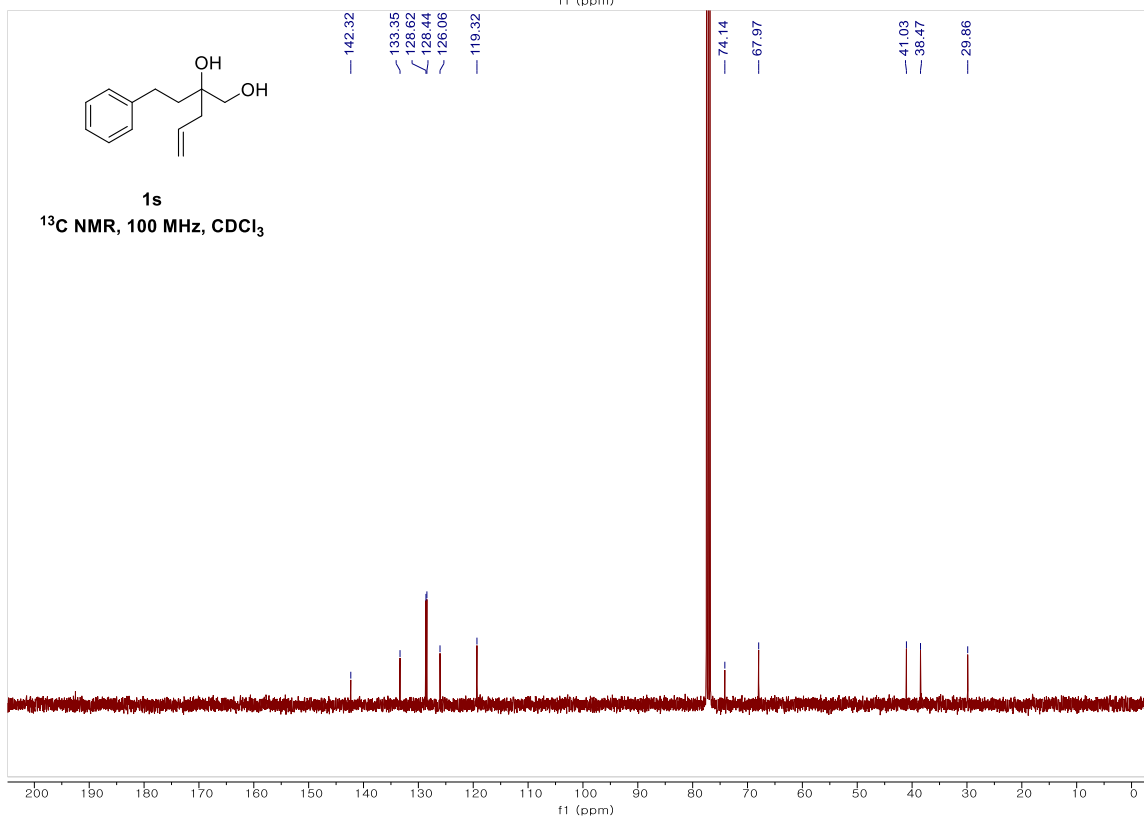



# phenylcyclohexane-1,2-diol (1u)

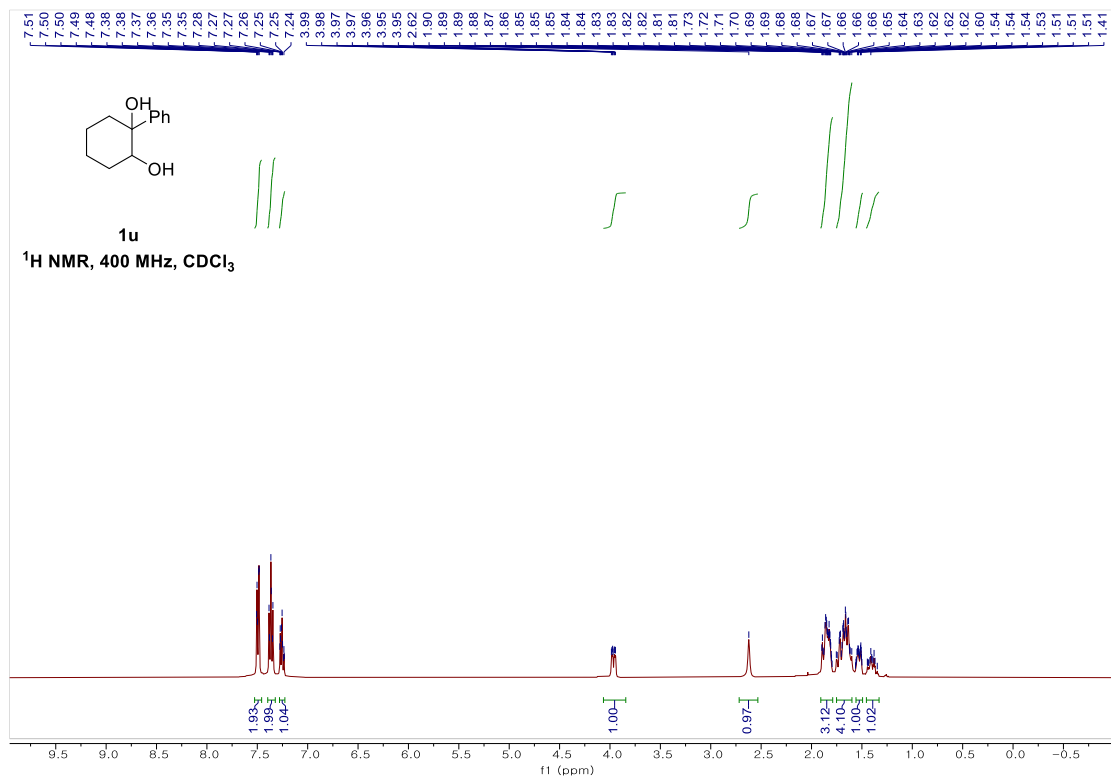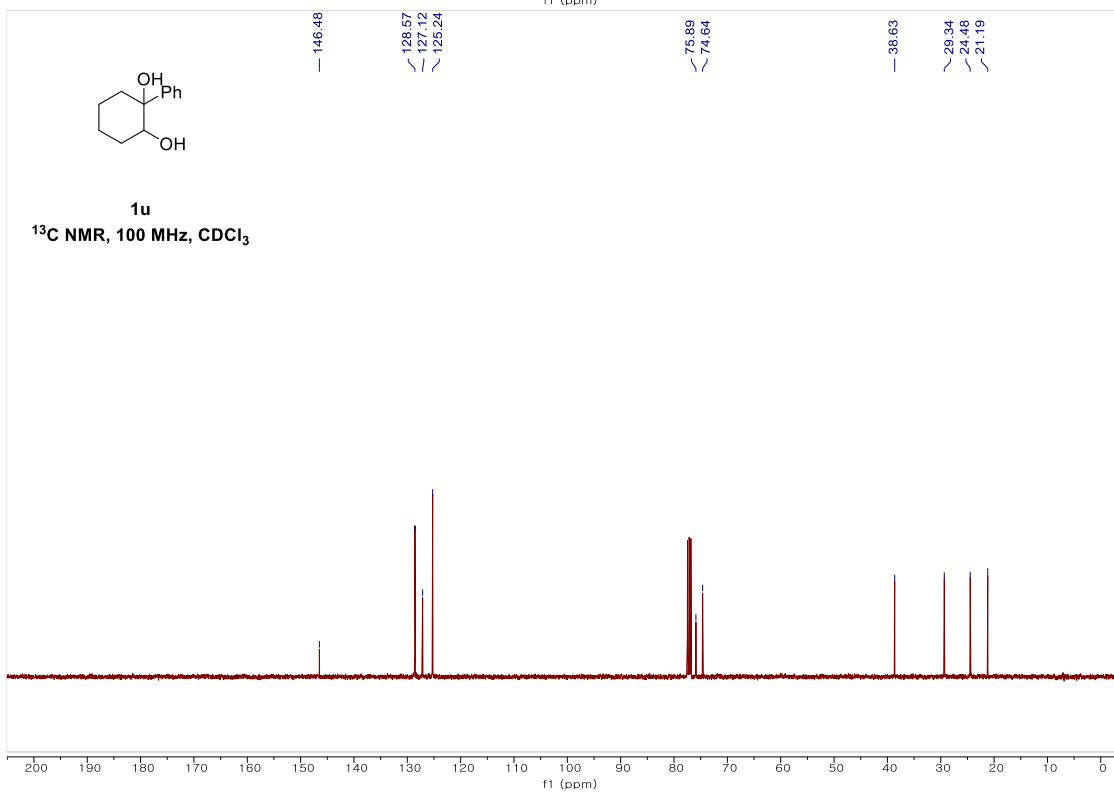

# 1,1-diphenylpropane-1,3-diol (1v)

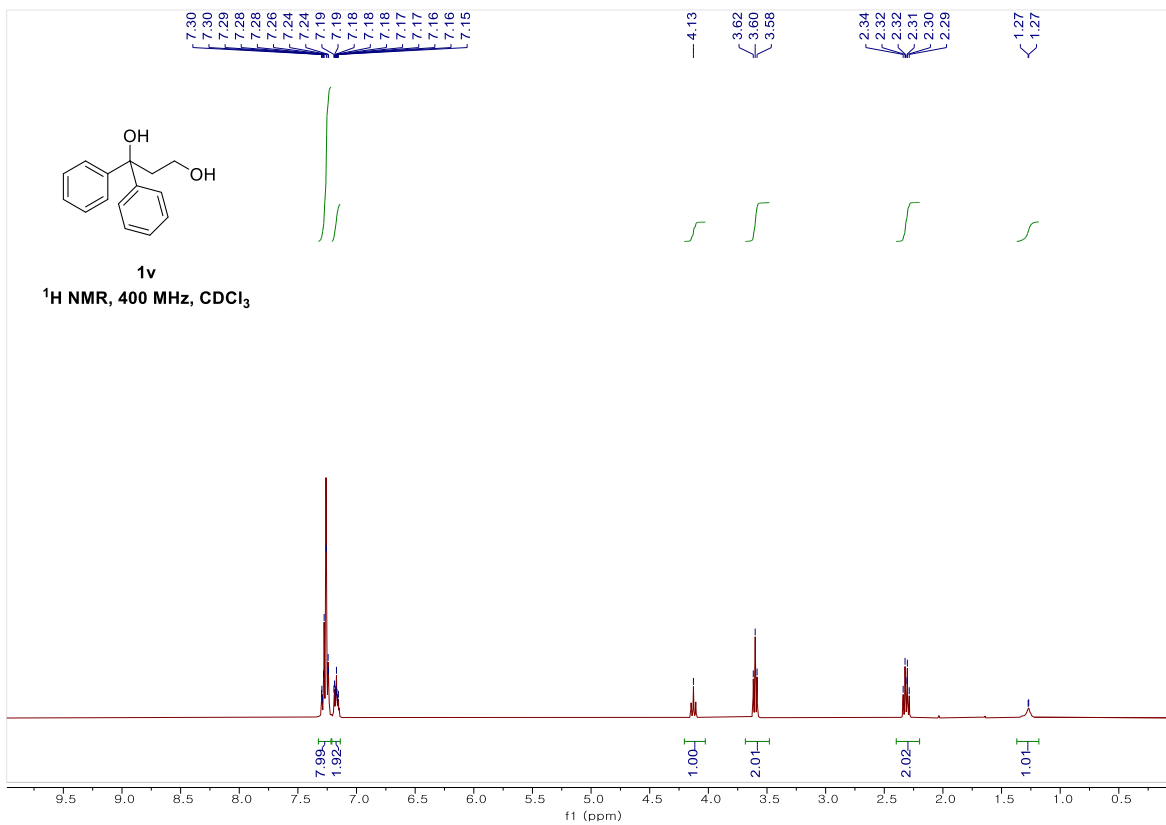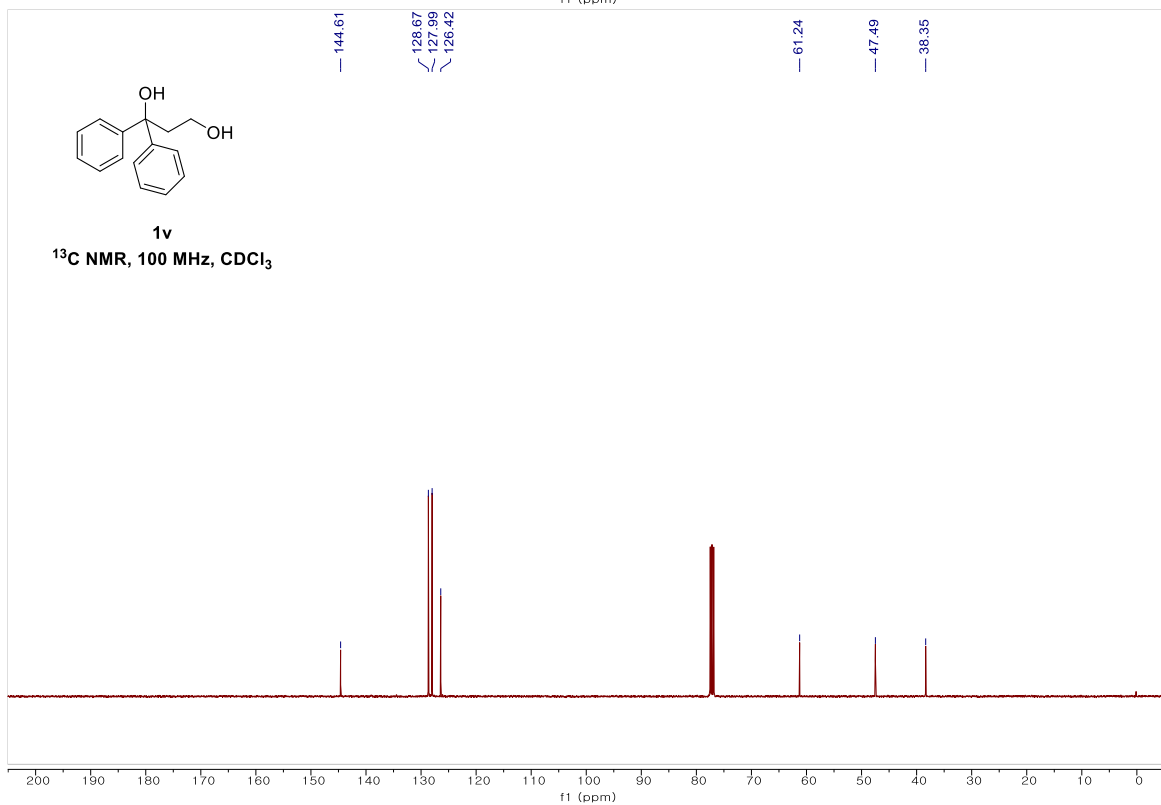

# 1,1-diphenylbutane-1,4-diol (1w)

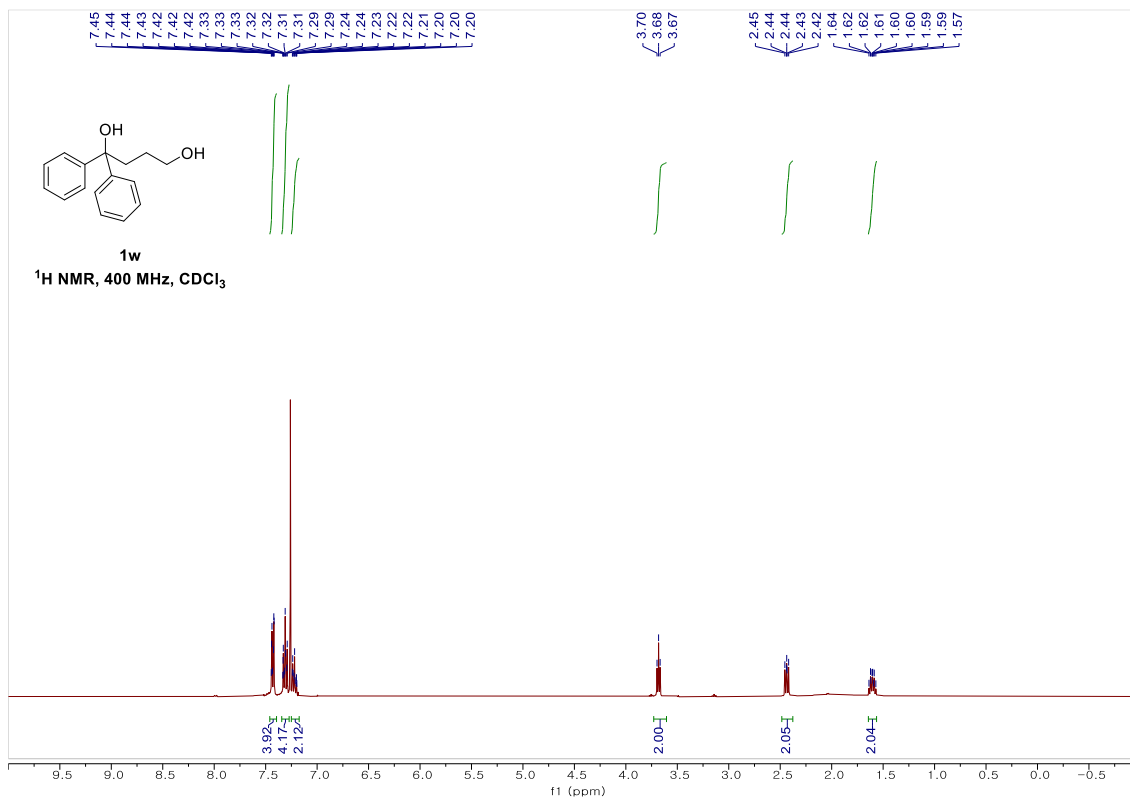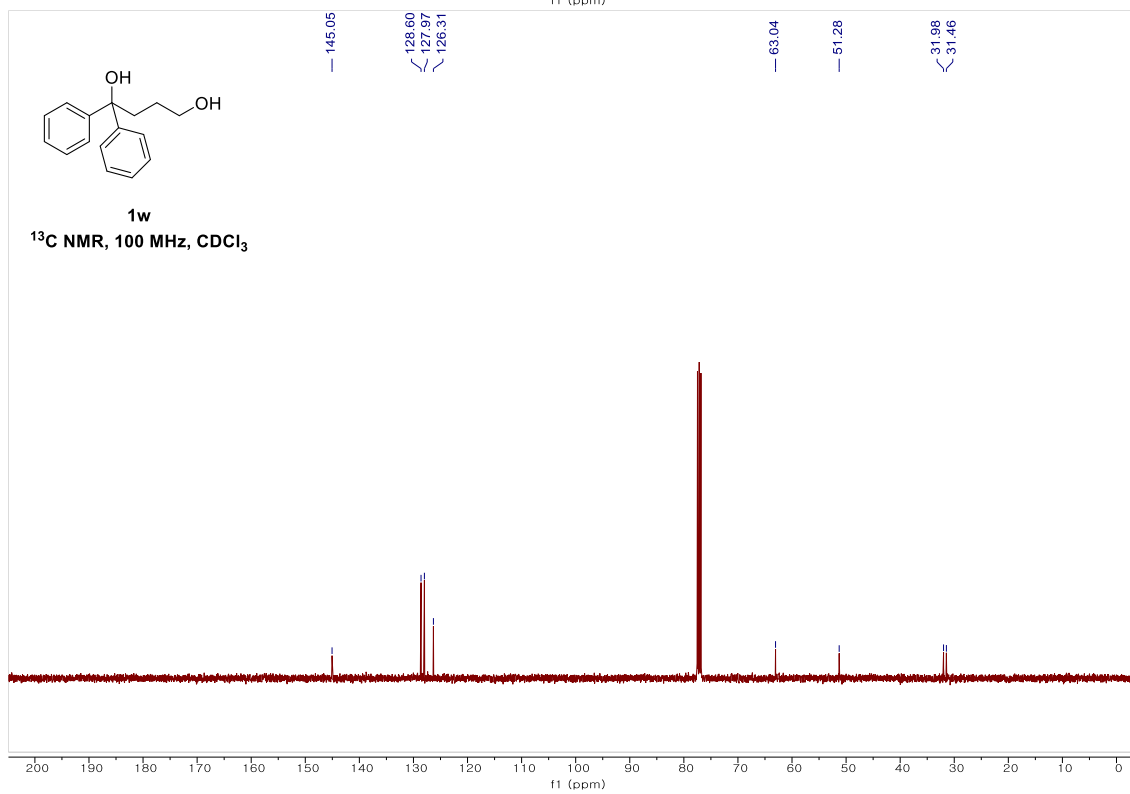

# 1-phenylpropane-1,2-diol (1y)

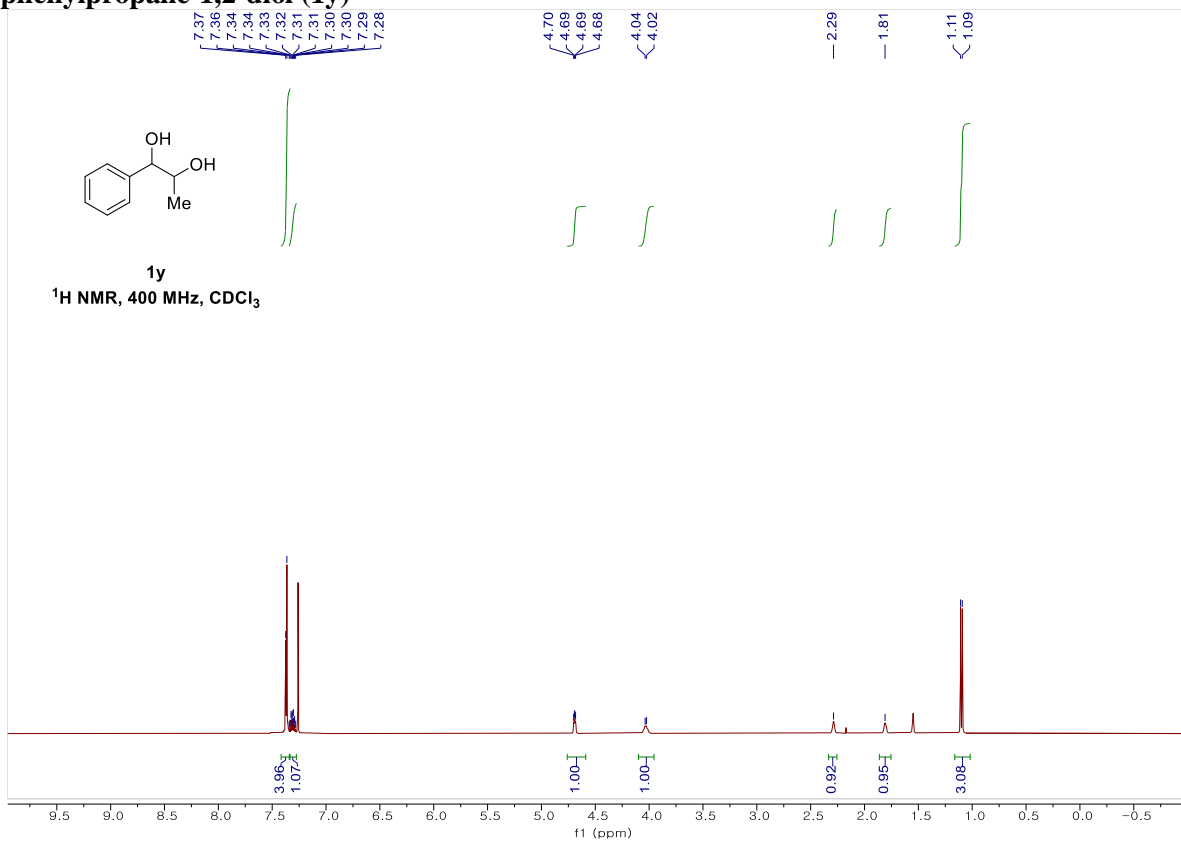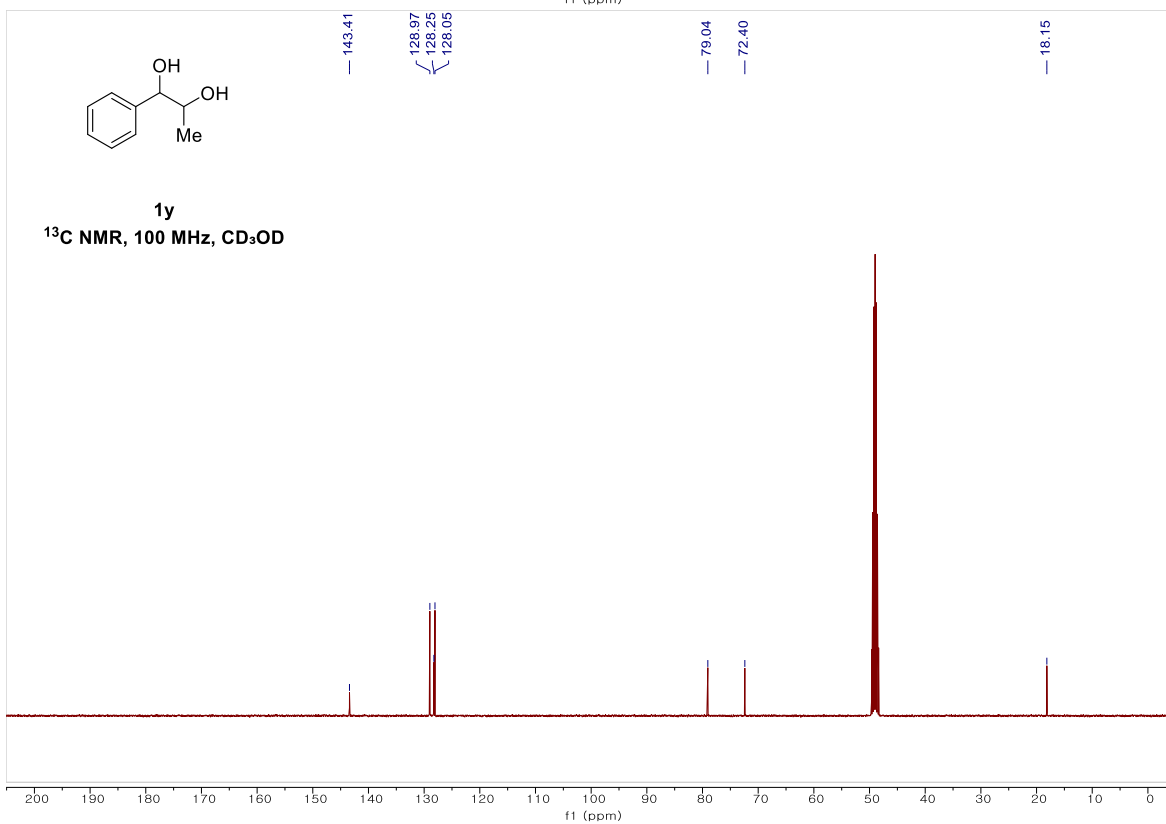

# 1-(4-methoxyphenyl)propane-1,2-diol (1z)

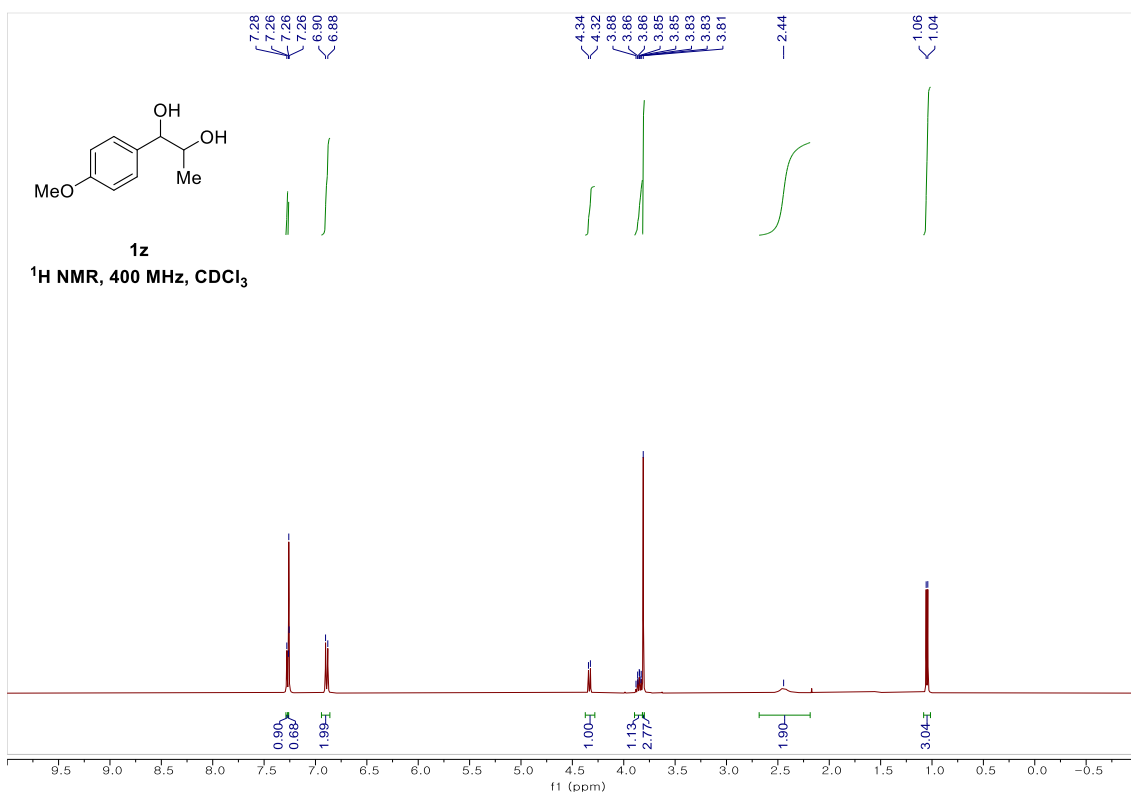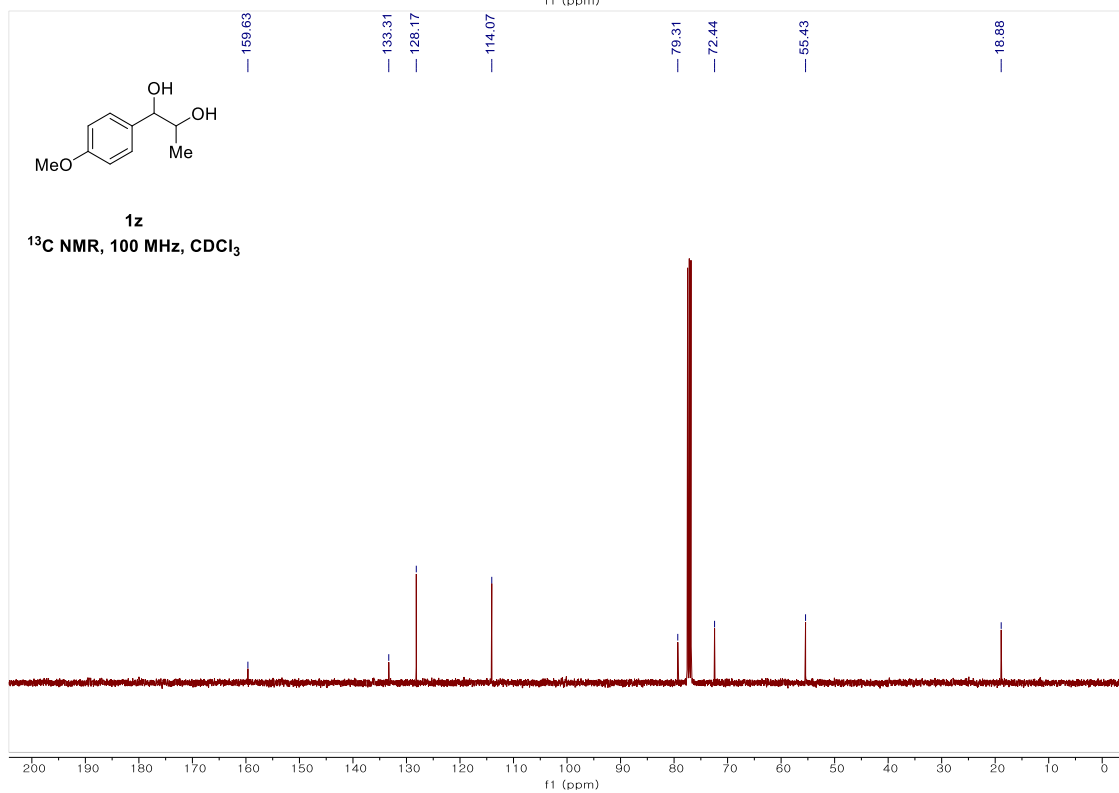

# 1-(benzo[d][1,3]dioxol-5-yl)propane-1,2-diol (1aa)

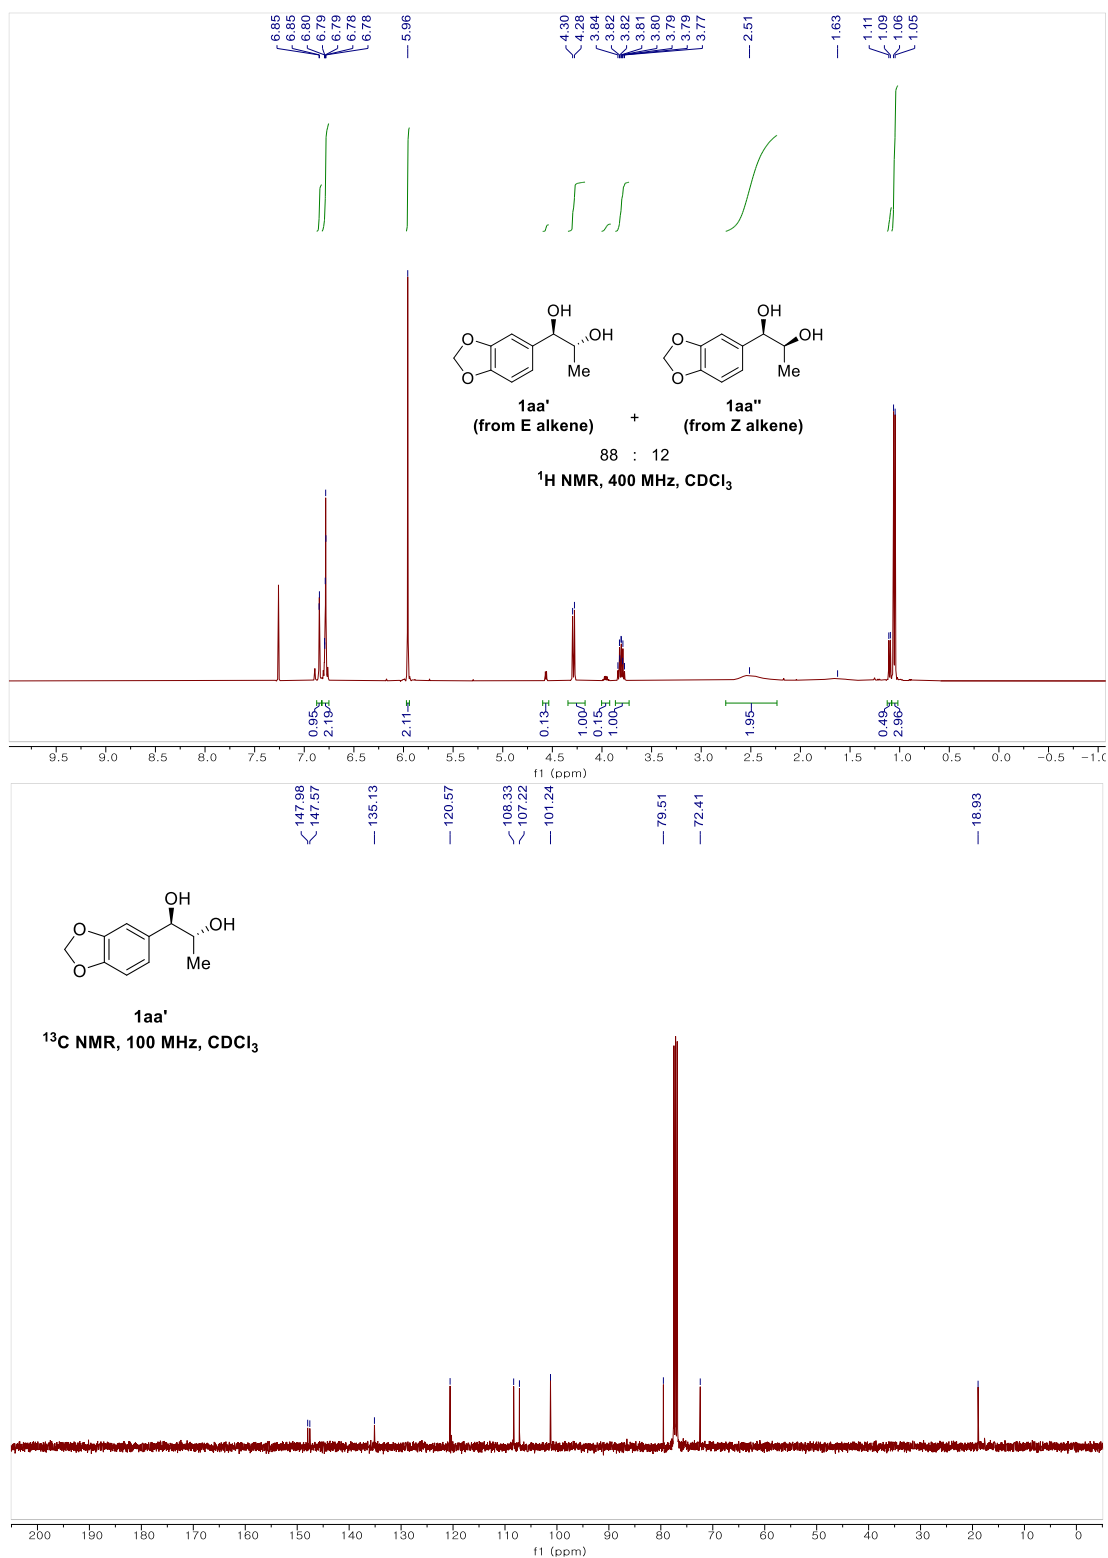

\*For compound **1aa**, <sup>1</sup>H NMR spectra were obtained from a diastereomeric mixture, while <sup>13</sup>C NMR data were recorded and integrated for the major diastereomer only.

# 1-(4-hydroxy-3-methoxyphenyl)propane-1,2-diol (1ab)

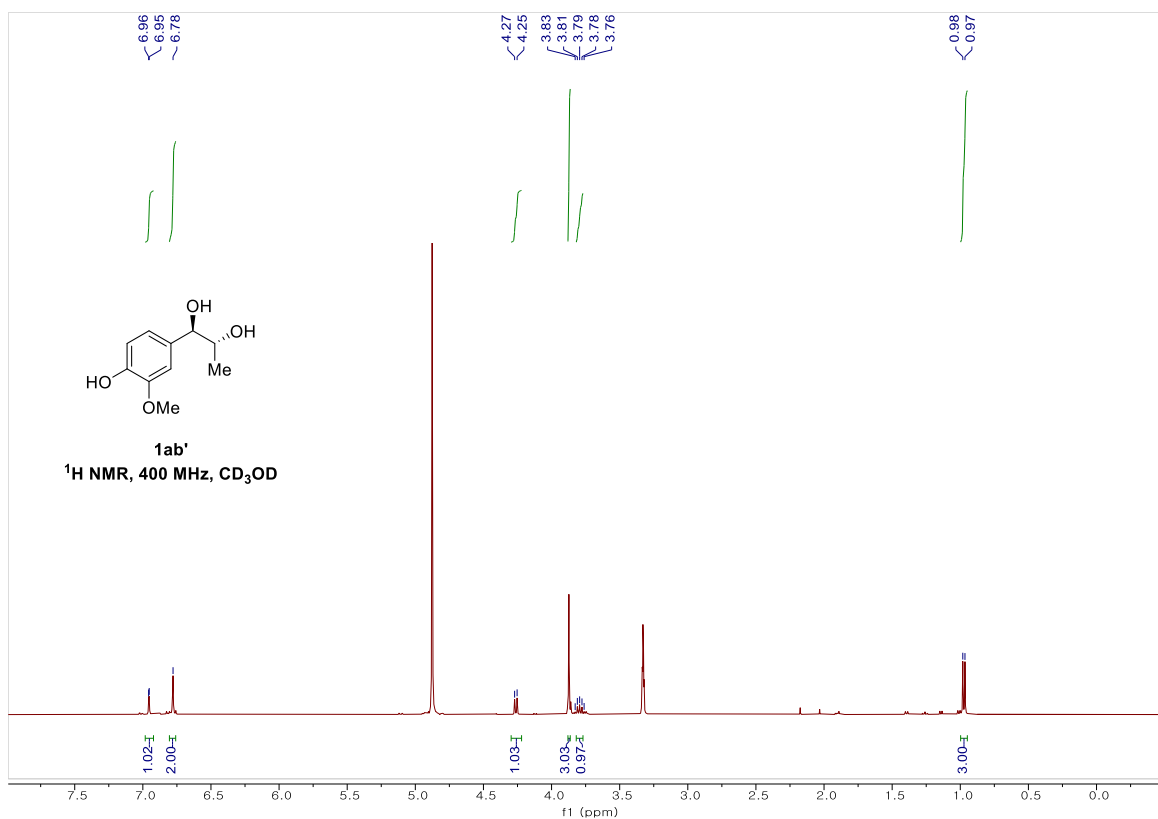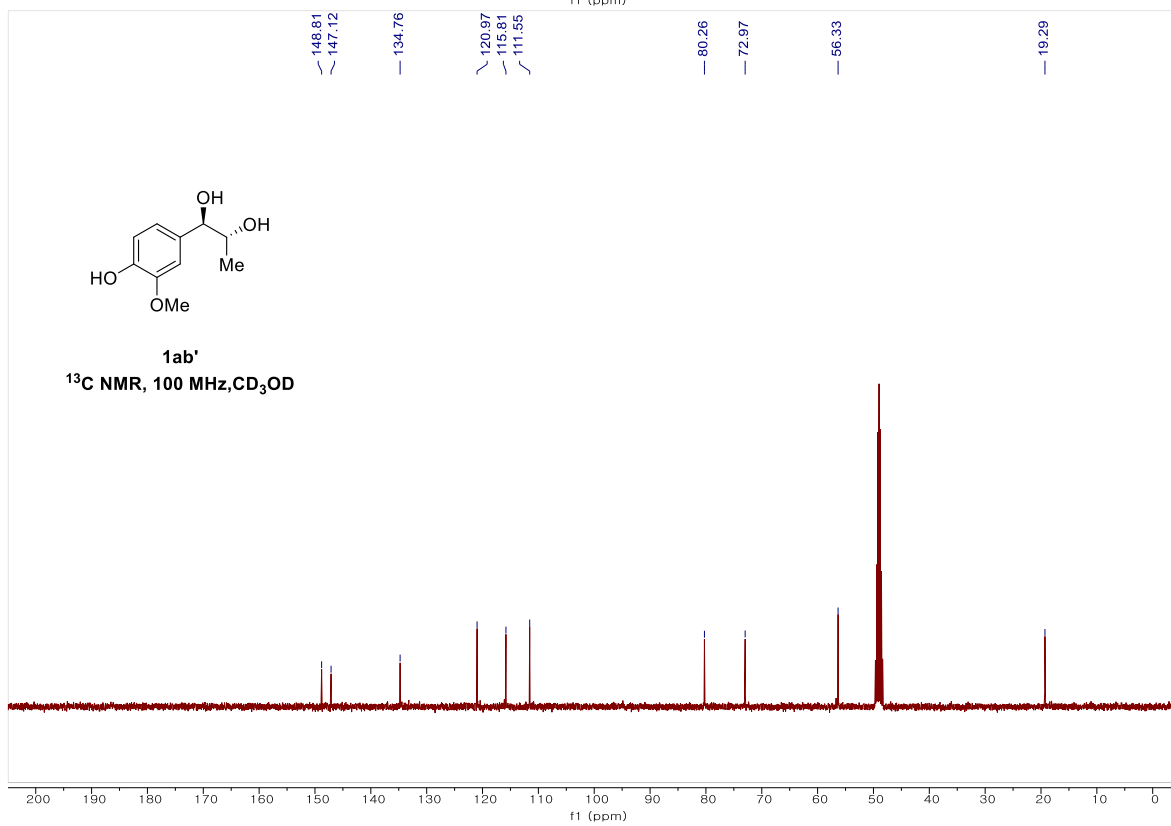

# 1-(benzo[d][1,3]dioxol-5-yl)-4,4-dimethylpentane-1,2,3-triol (1ac)

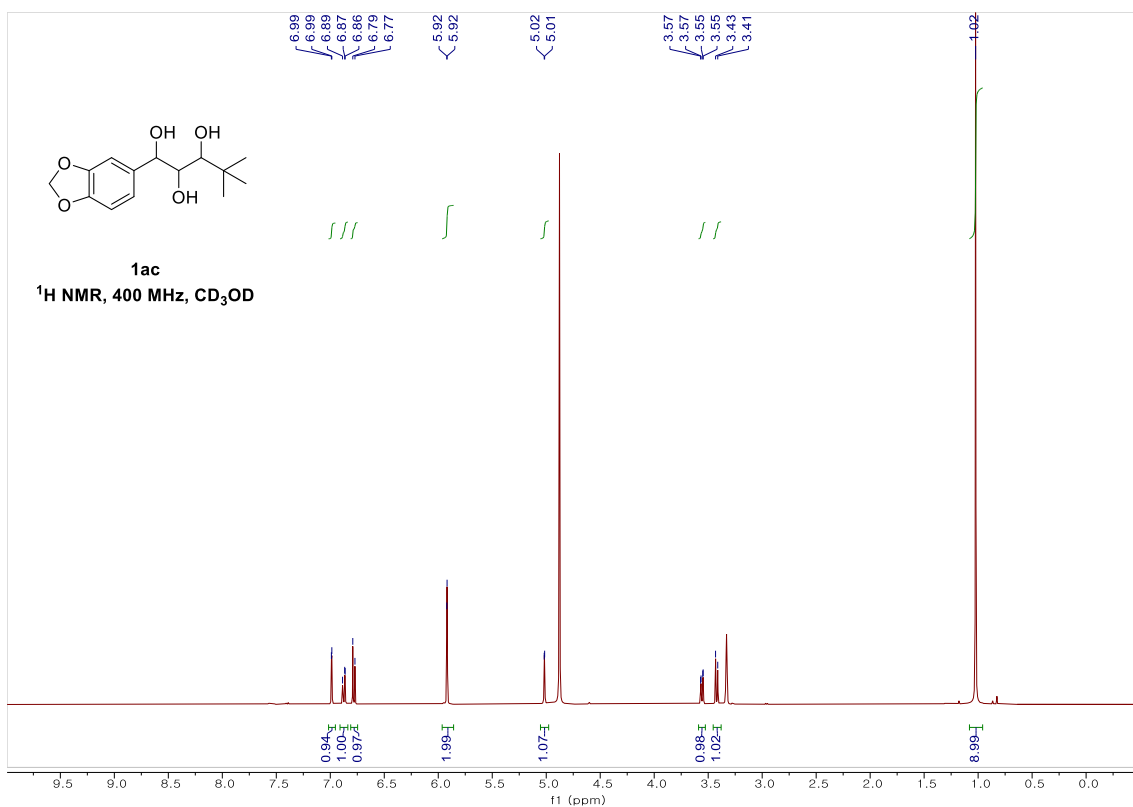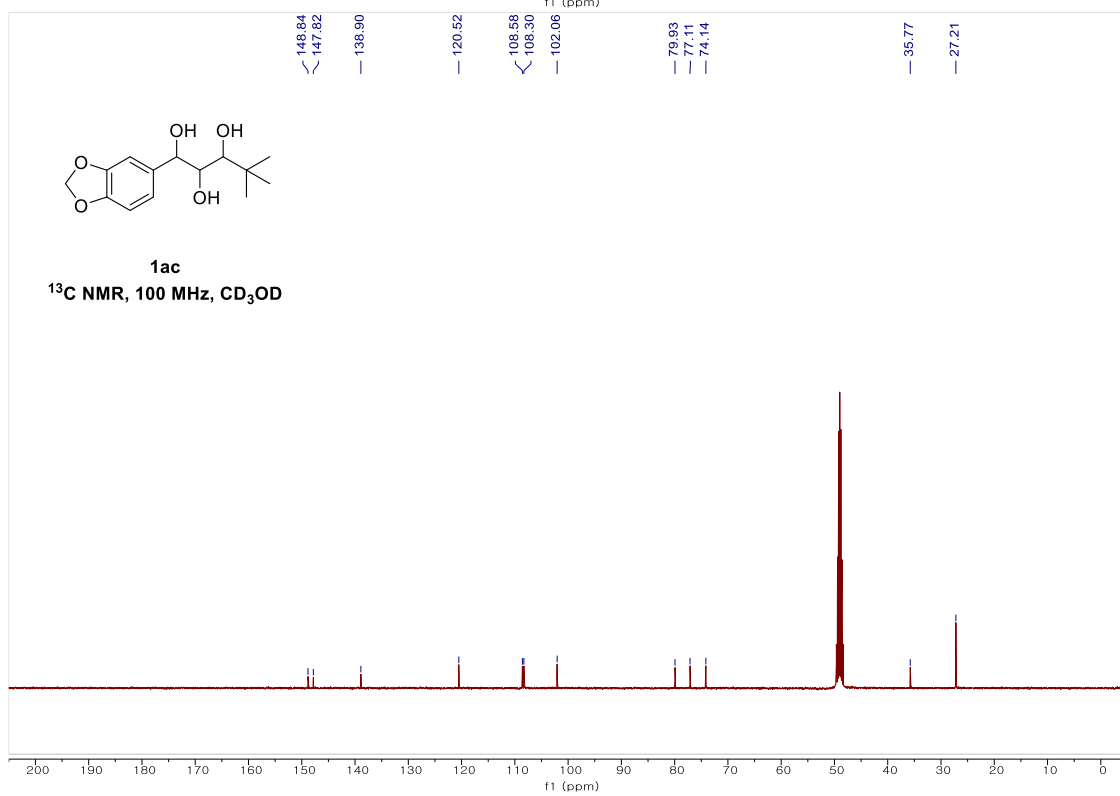

## 2,2-diphenylethan-1-ol (2a)

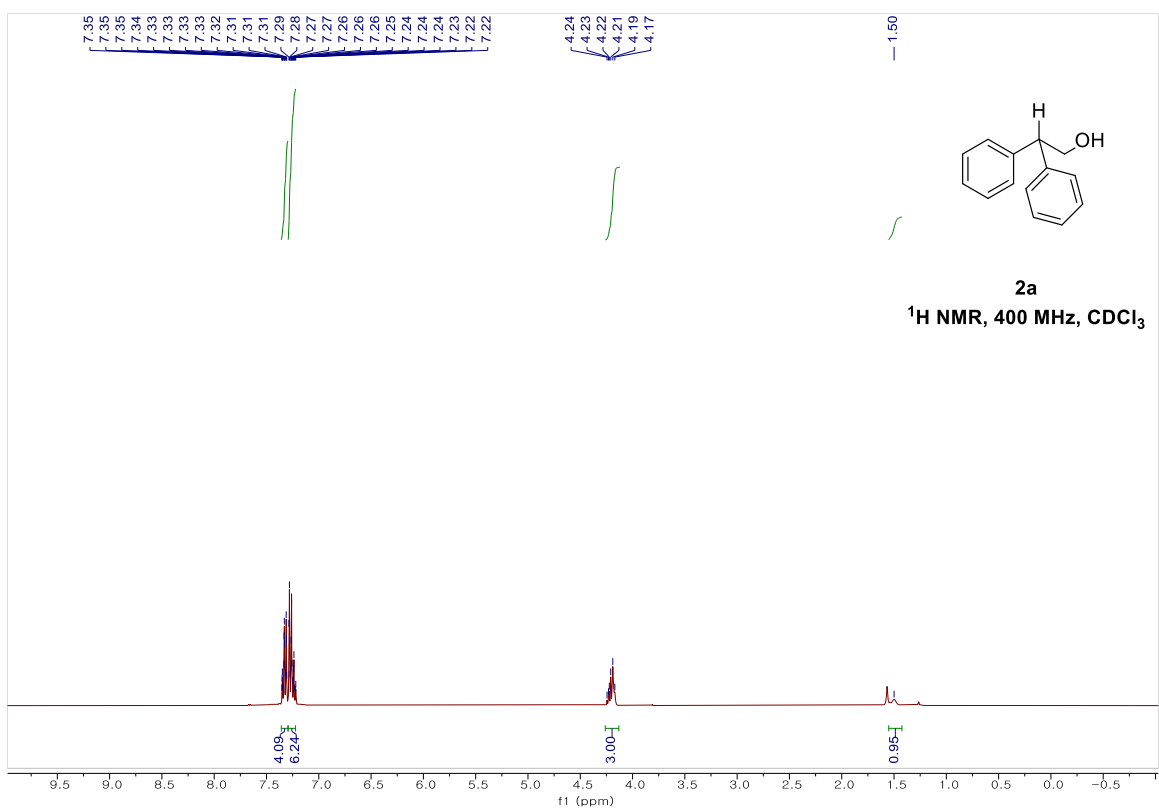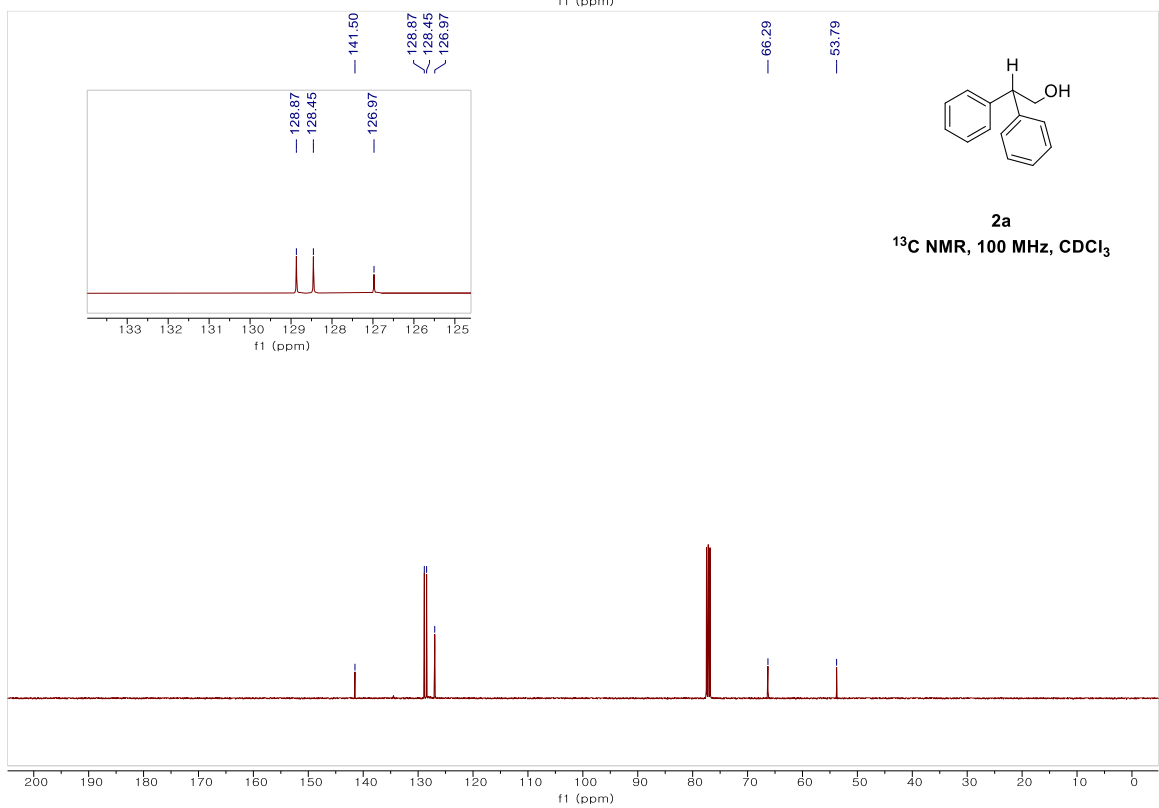

## 2-(4-chlorophenyl)-2-phenylethan-1-ol (2b)

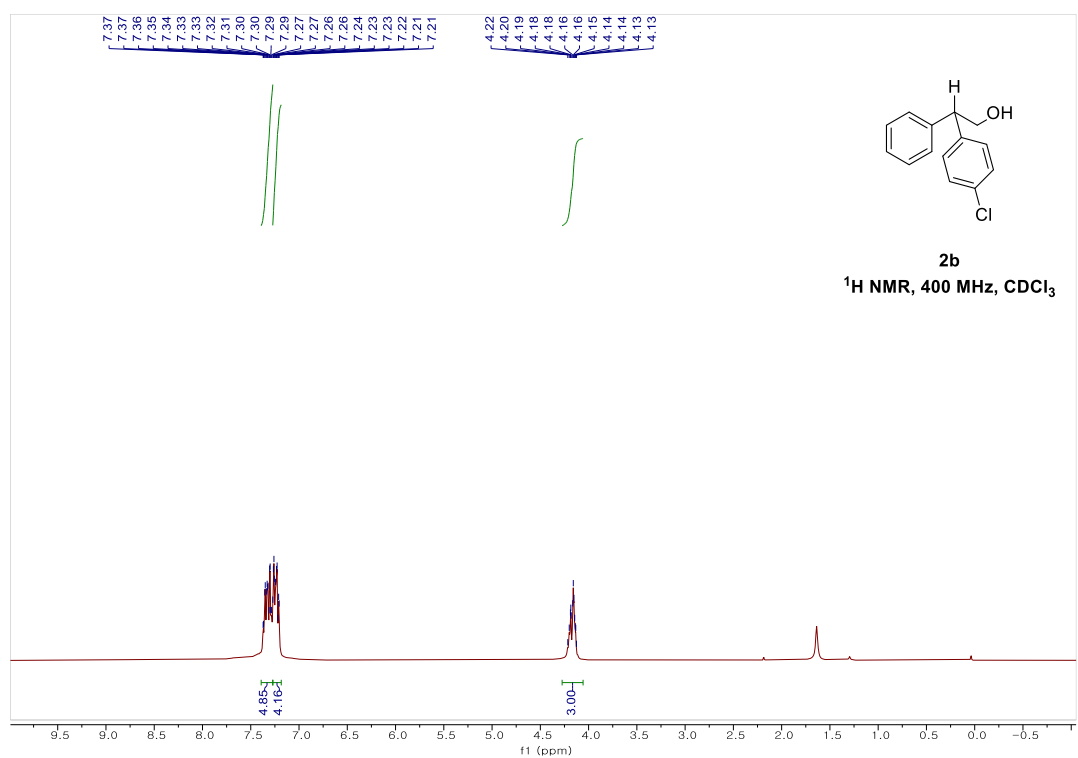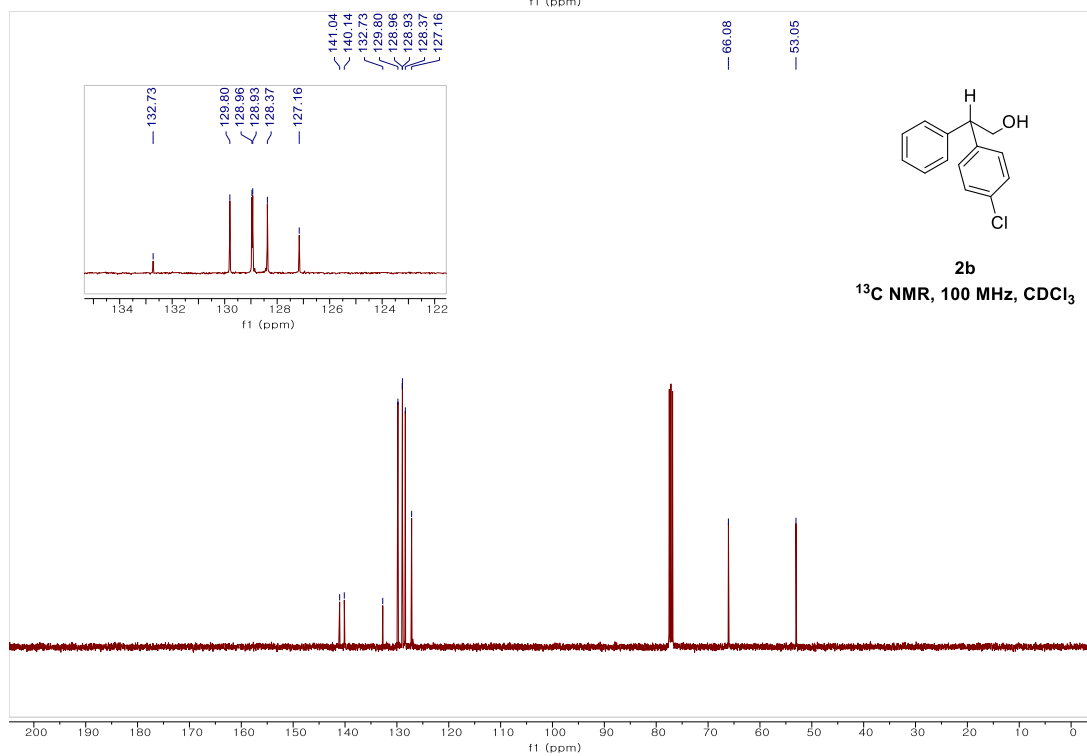

## 2-(4-fluorophenyl)-2-phenylethan-1-ol (2c)

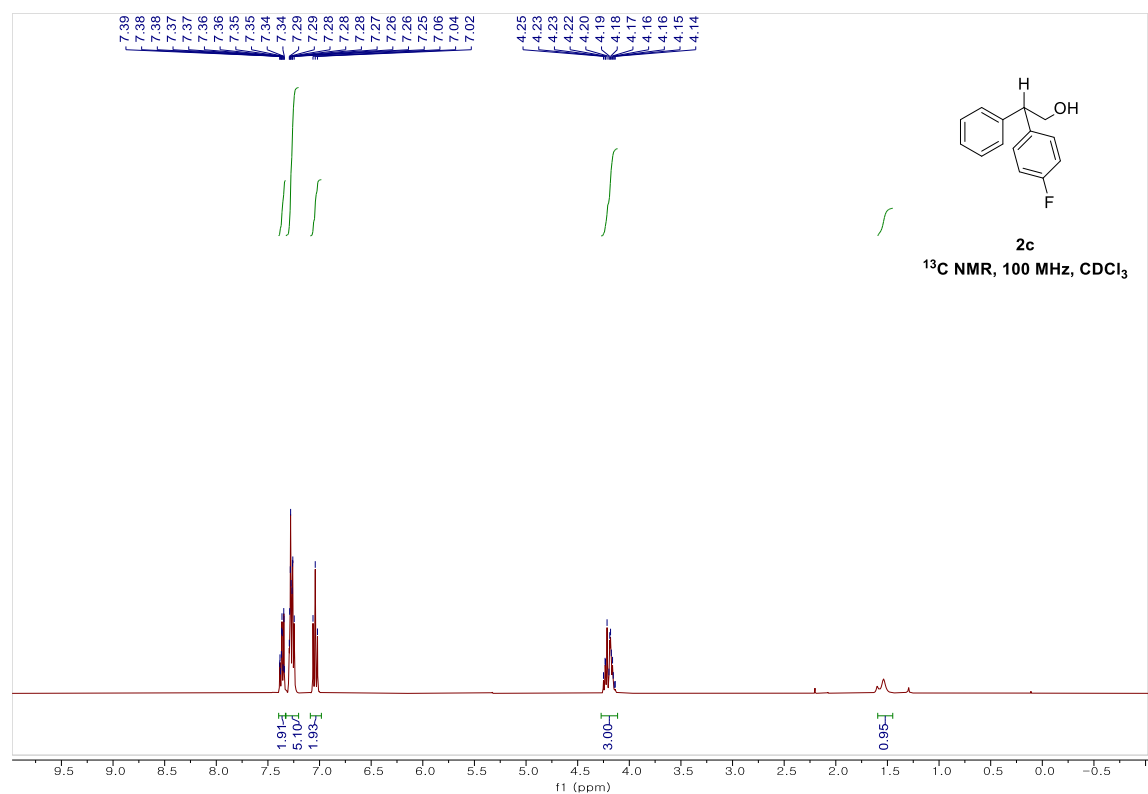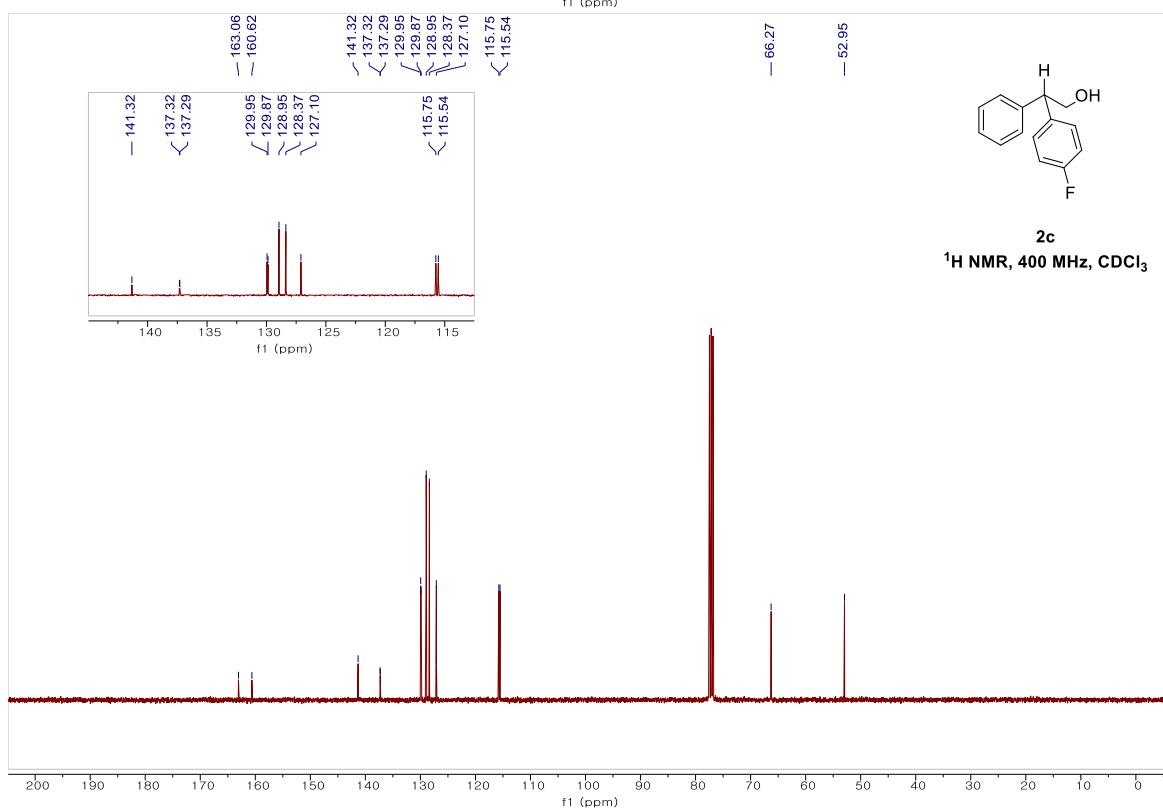

## 2-phenyl-2-(p-tolyl)ethan-1-ol (2d)

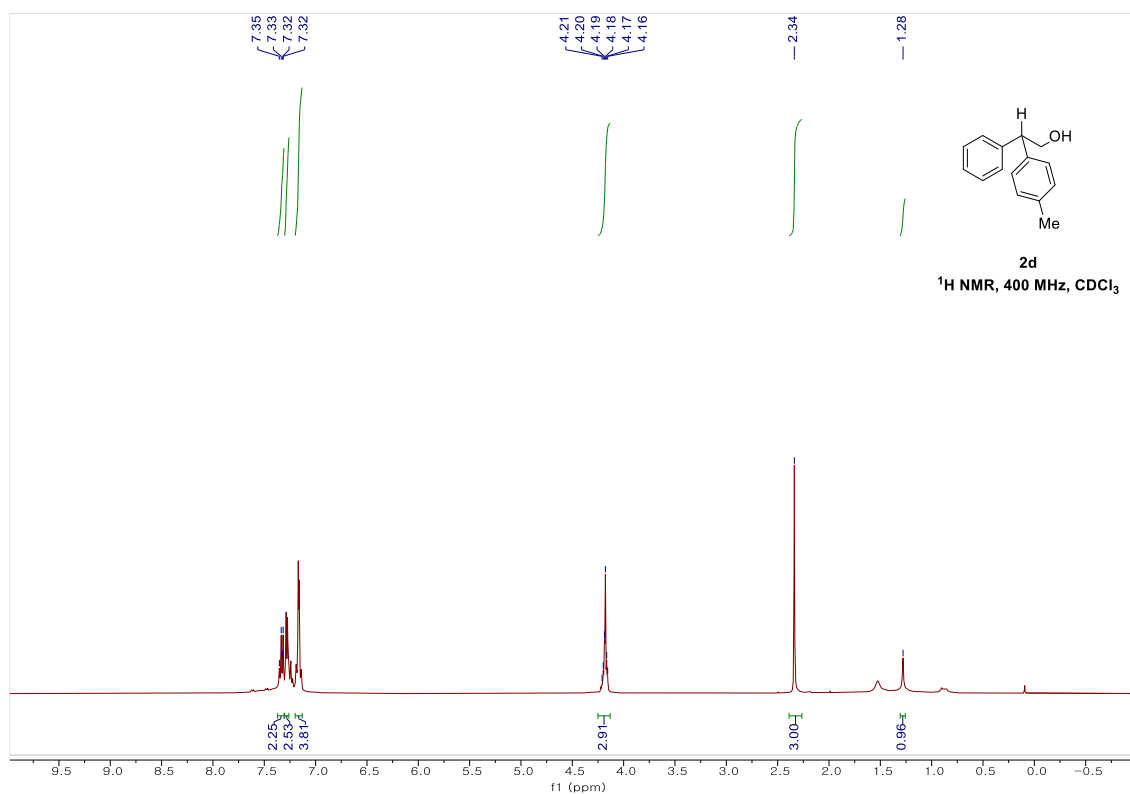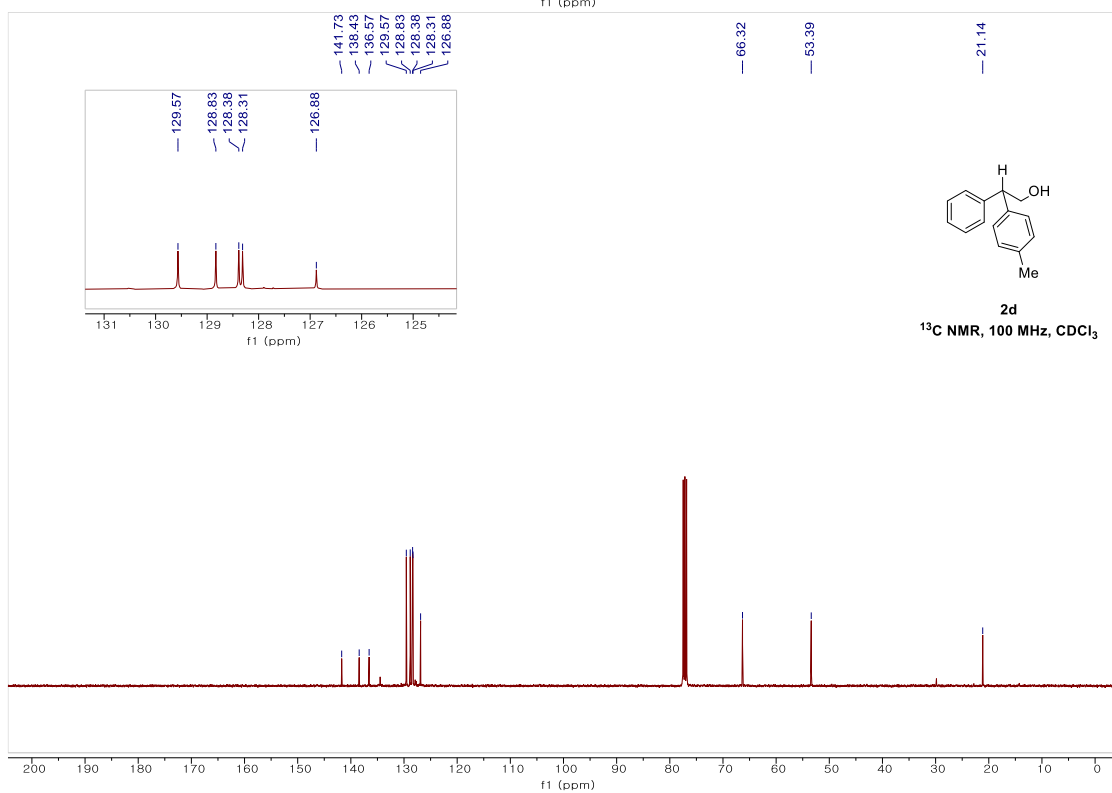

## 2-(4-methoxyphenyl)-2-phenylethan-1-ol (2e)

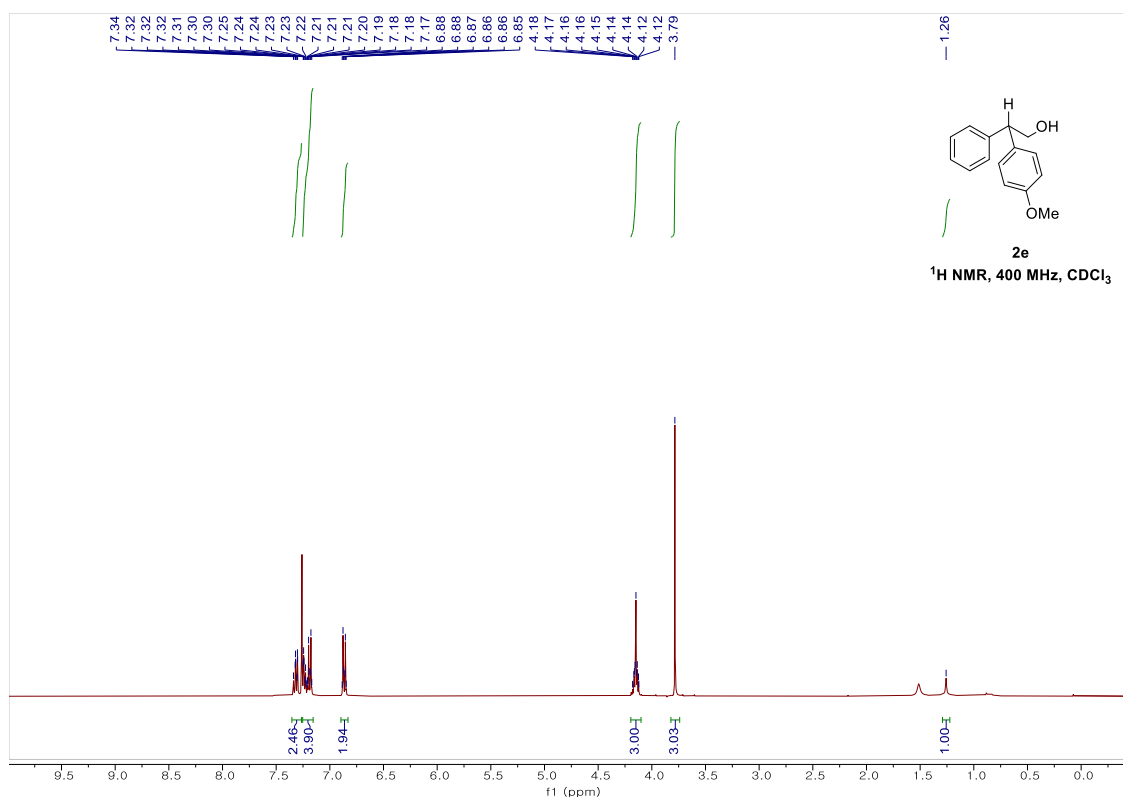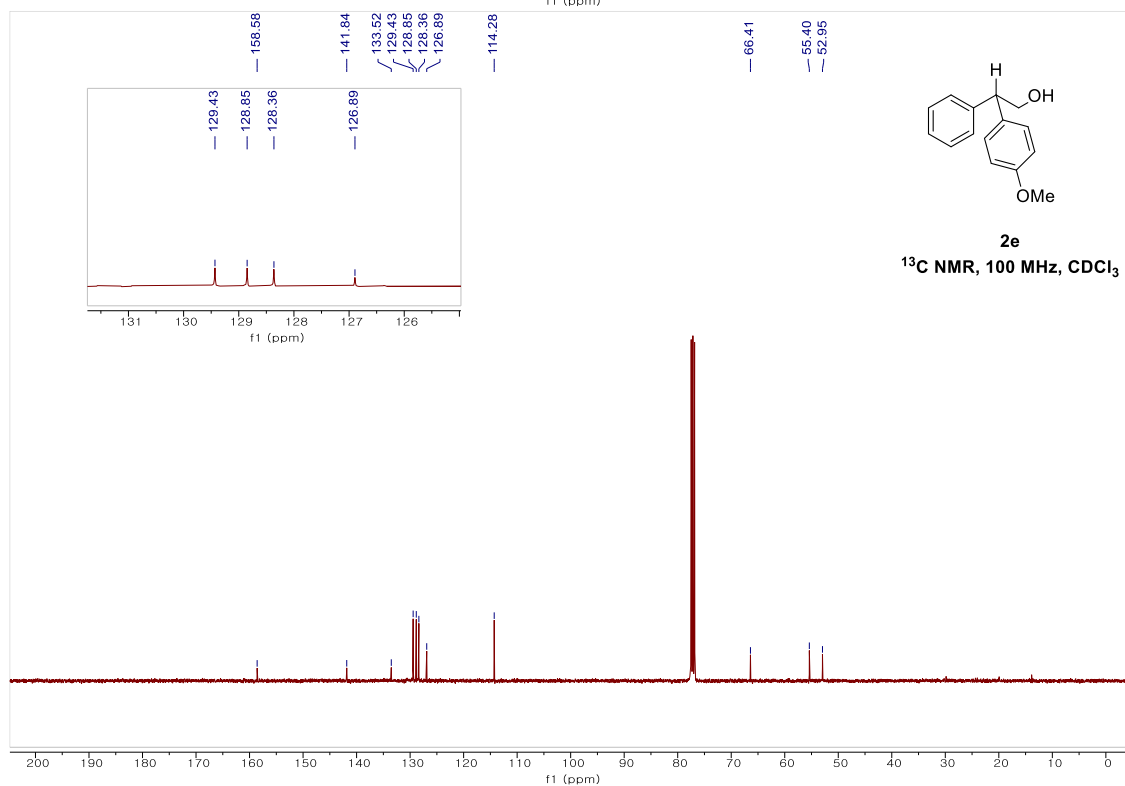

## 2-(4-((tert-butyldimethylsilyl)oxy)phenyl)-2-phenylethan-1-ol (2f)

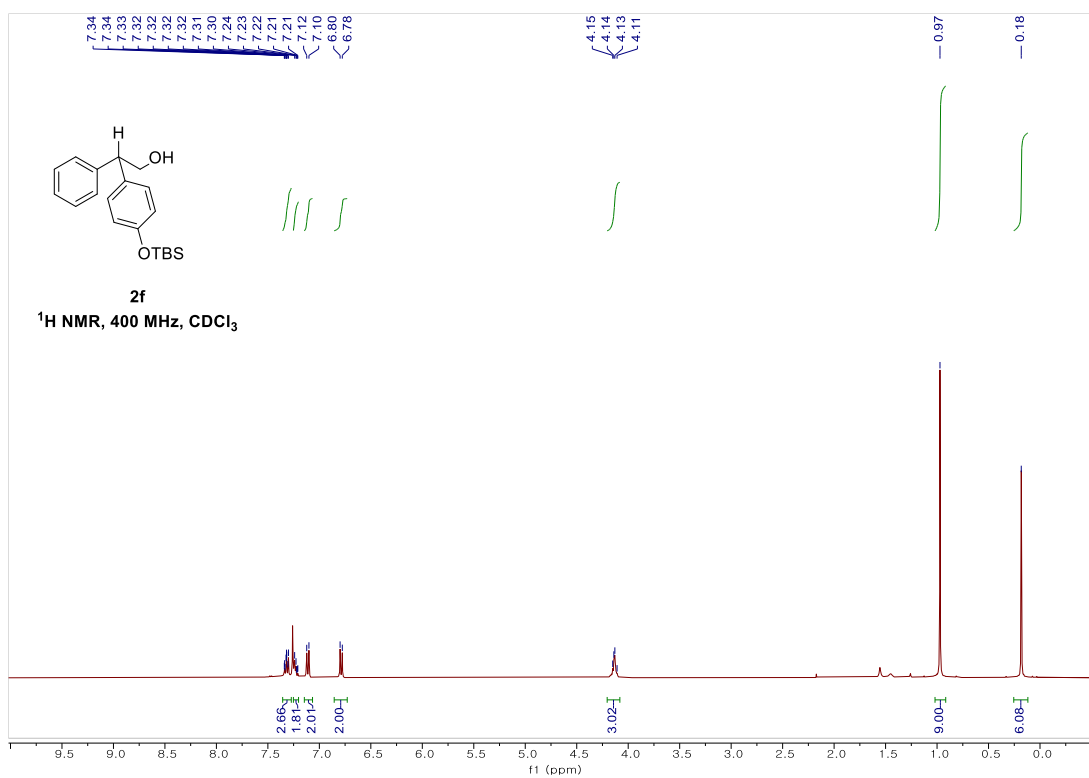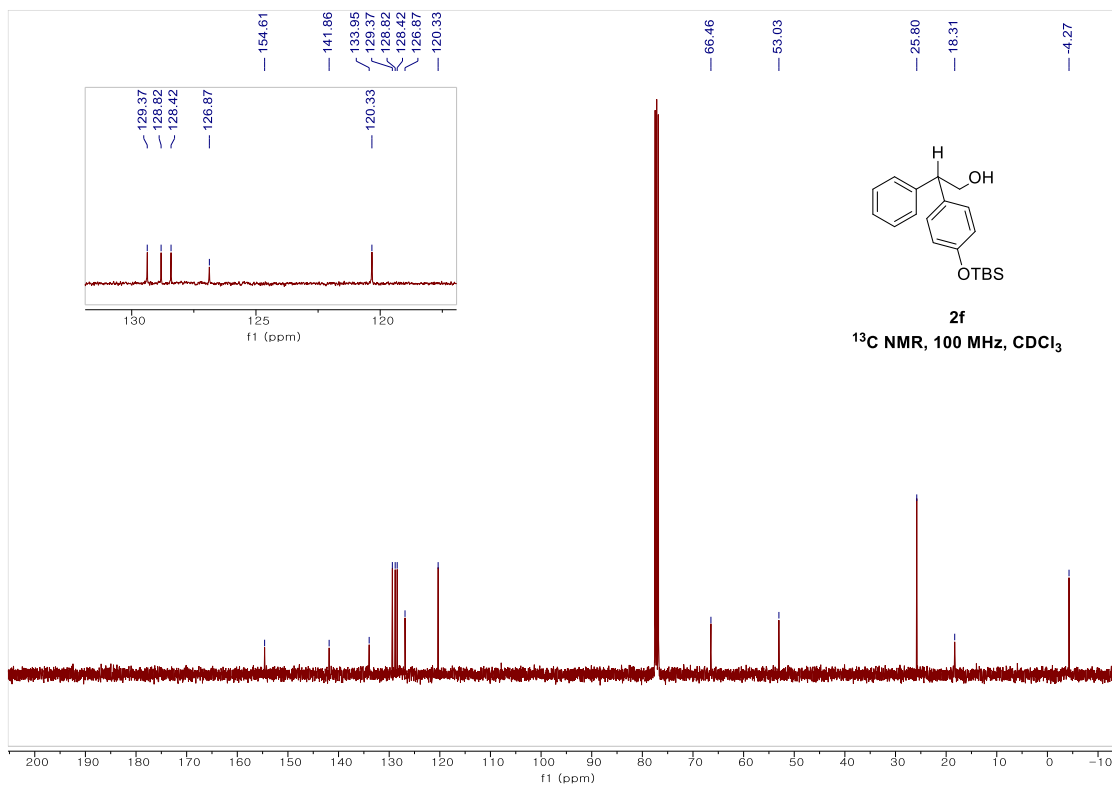

## 2-([1,1'-biphenyl]-4-yl)-2-phenylethan-1-ol (2g)

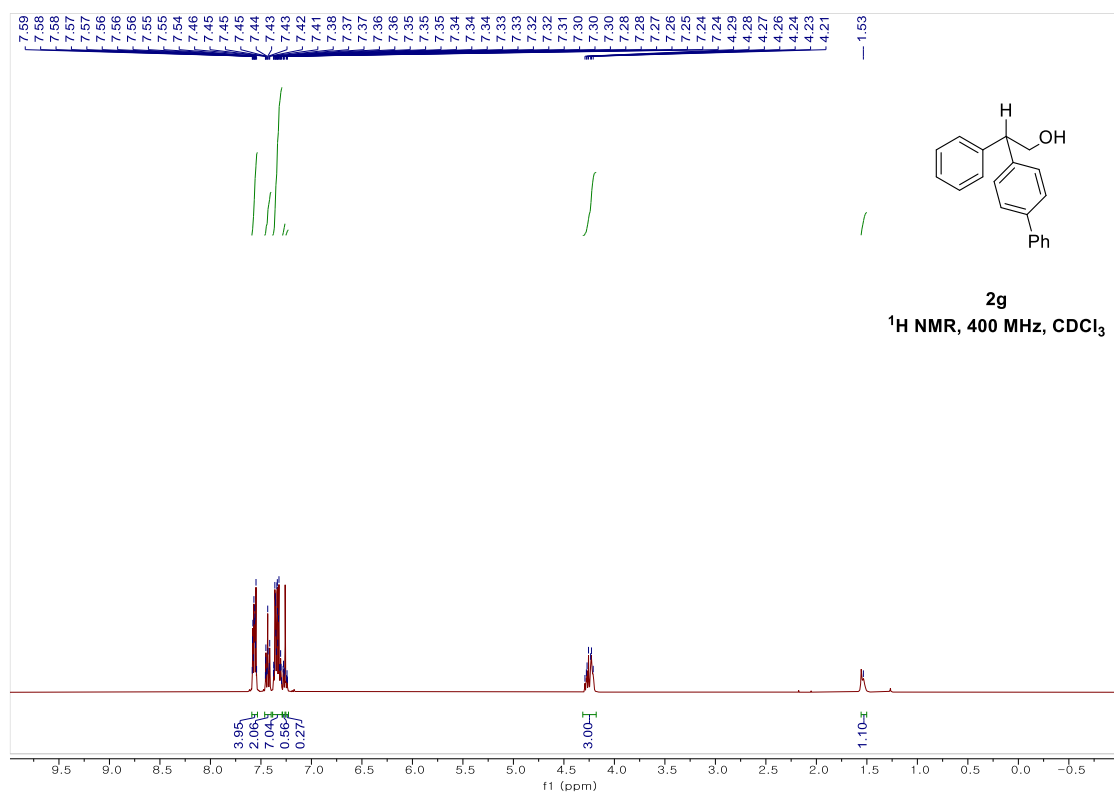

## 2-(2,6-dimethylphenyl)-2-phenylethan-1-ol (2h)

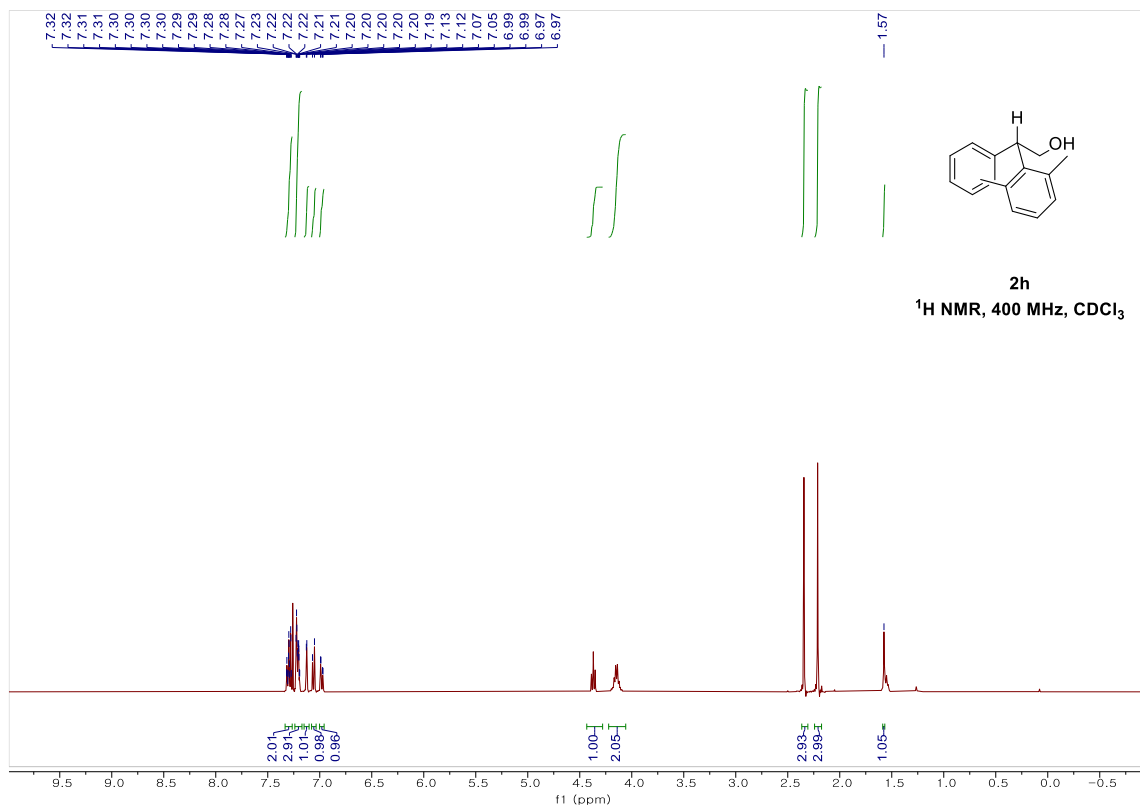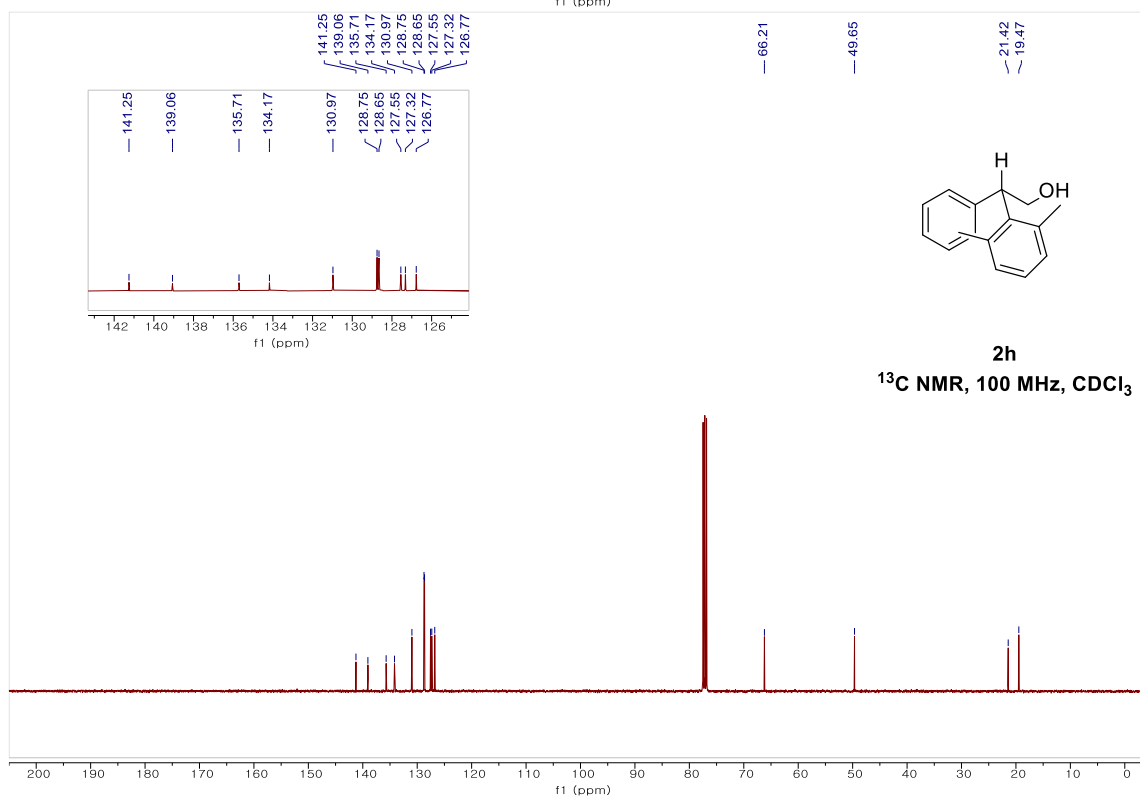

## 2-(naphthalen-2-yl)-2-phenylethan-1-ol (2i)

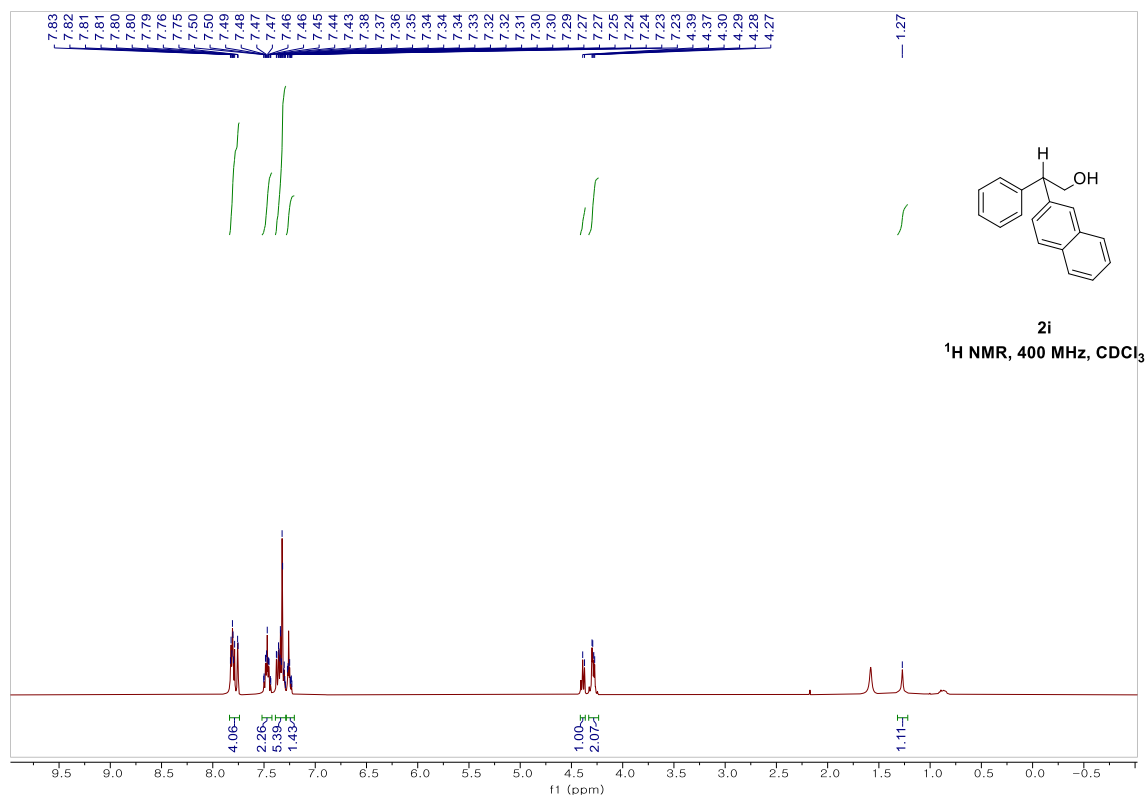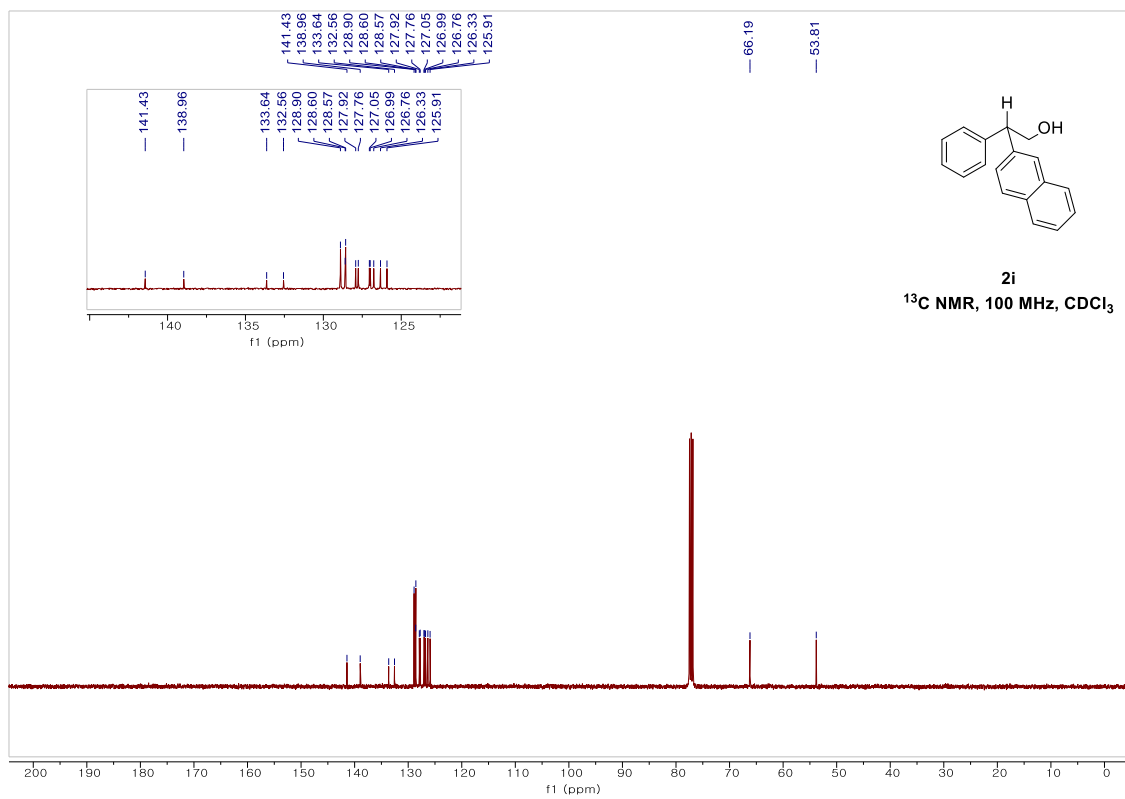

## 2-phenyl-2-(thiophen-2-yl)ethan-1-ol (2j)

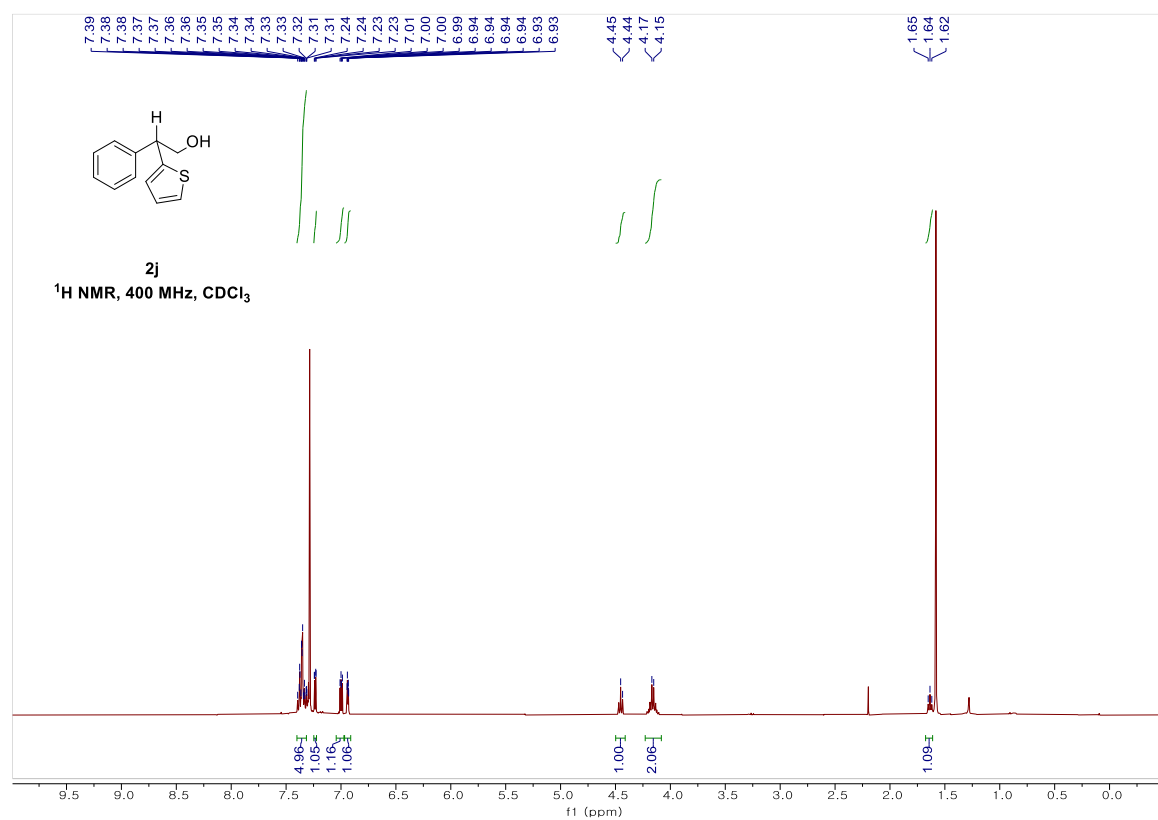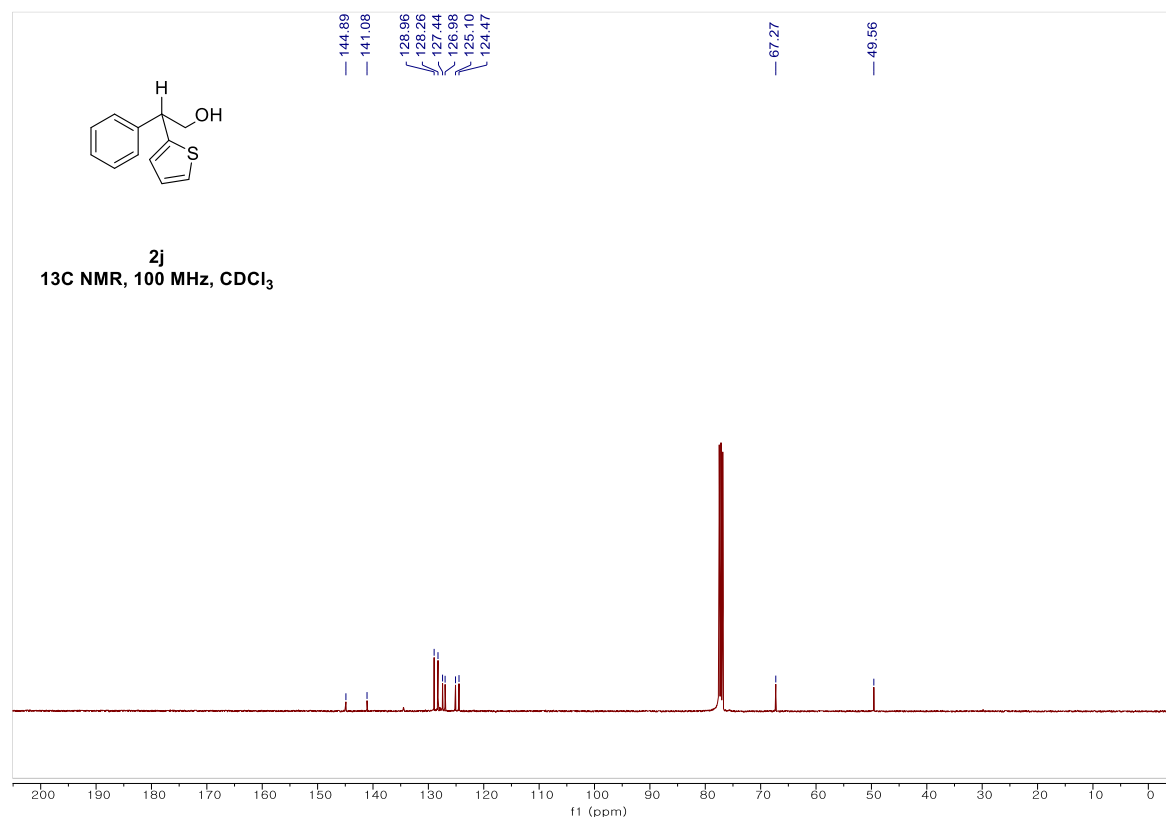

## 2-phenylpropan-1-ol (2k)

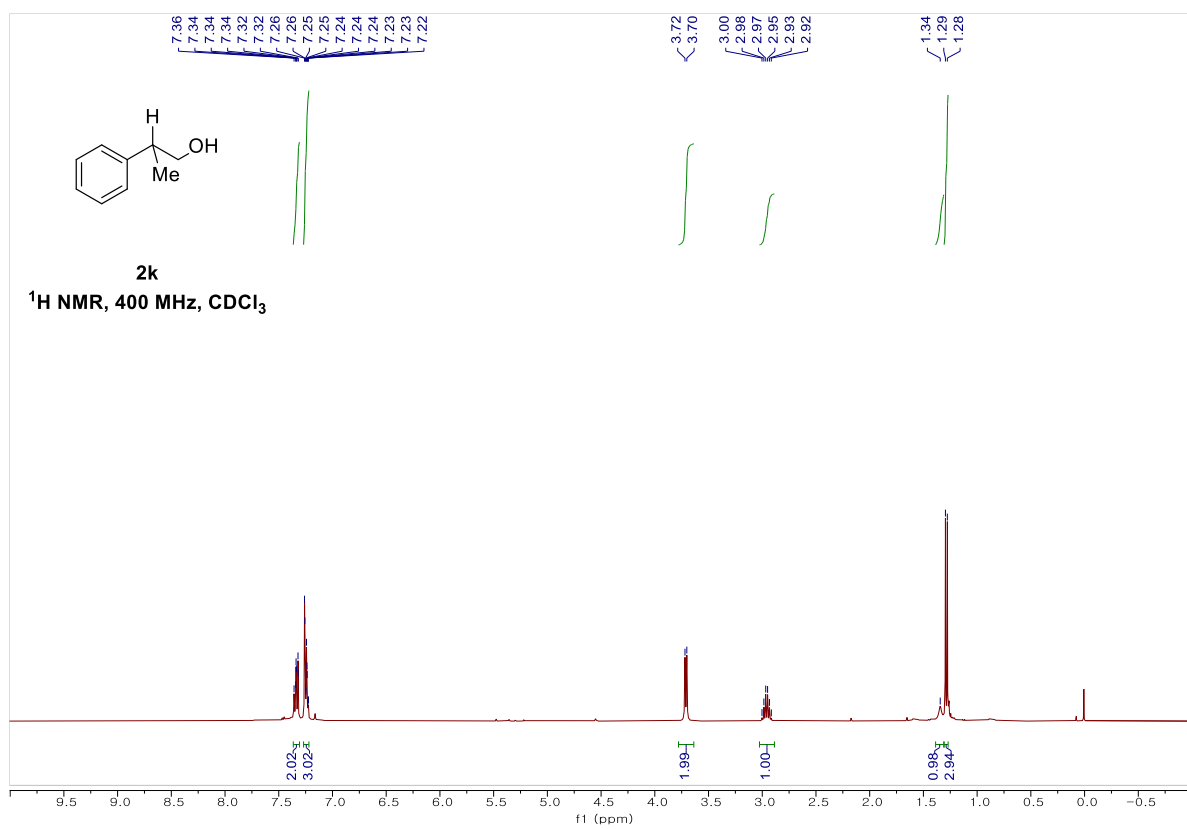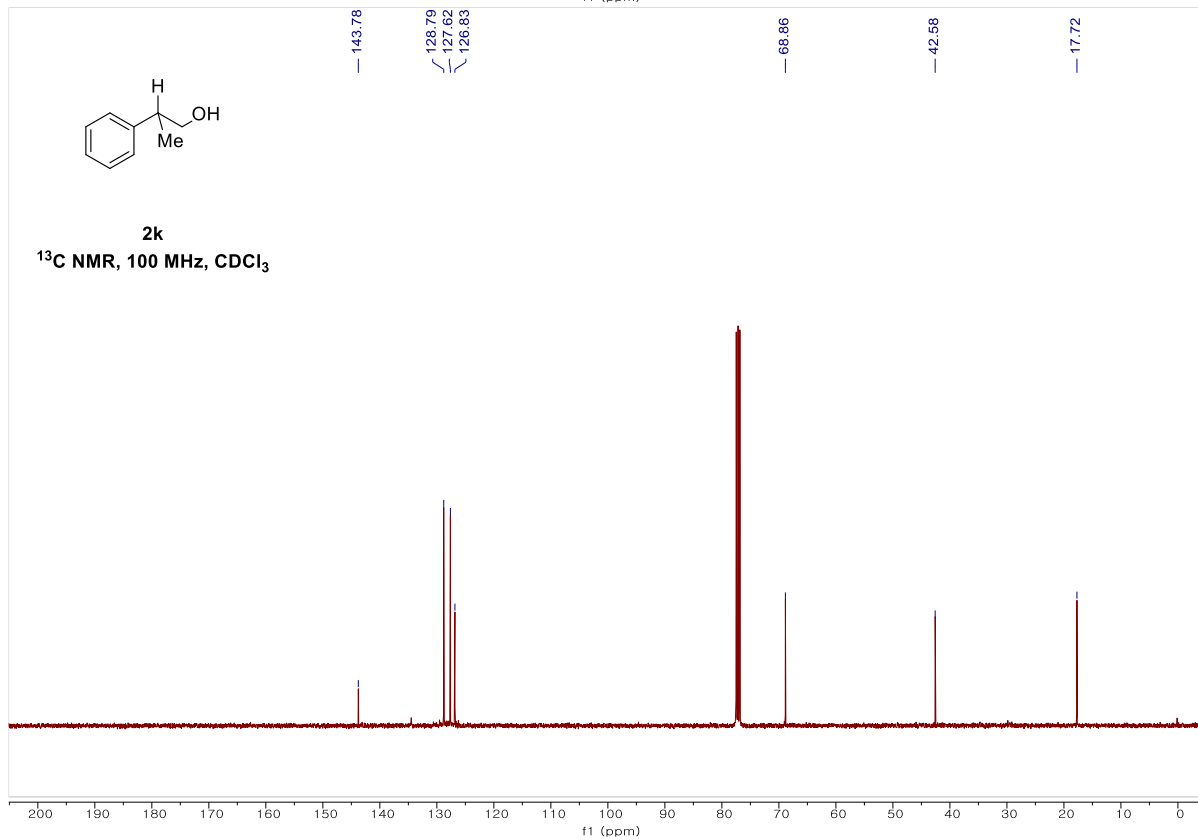

### 4-(1-hydroxypropan-2-yl)phenol (2l)

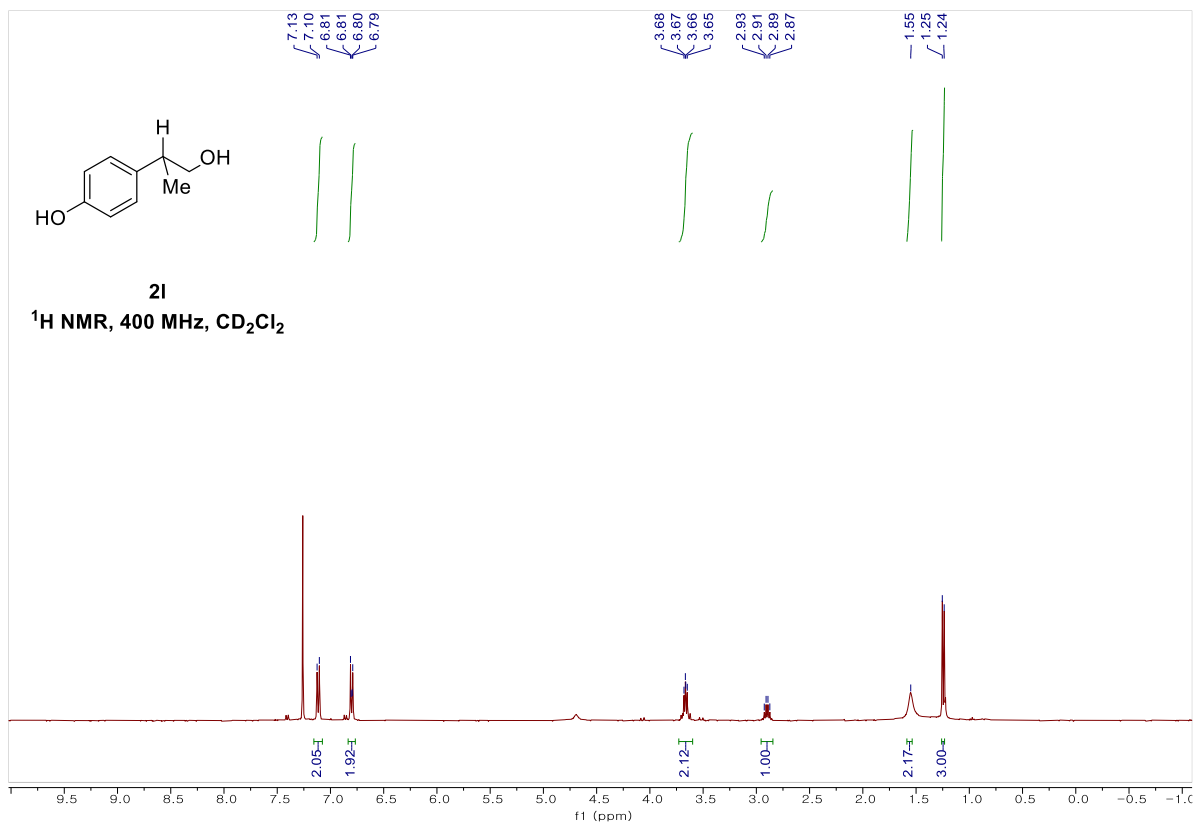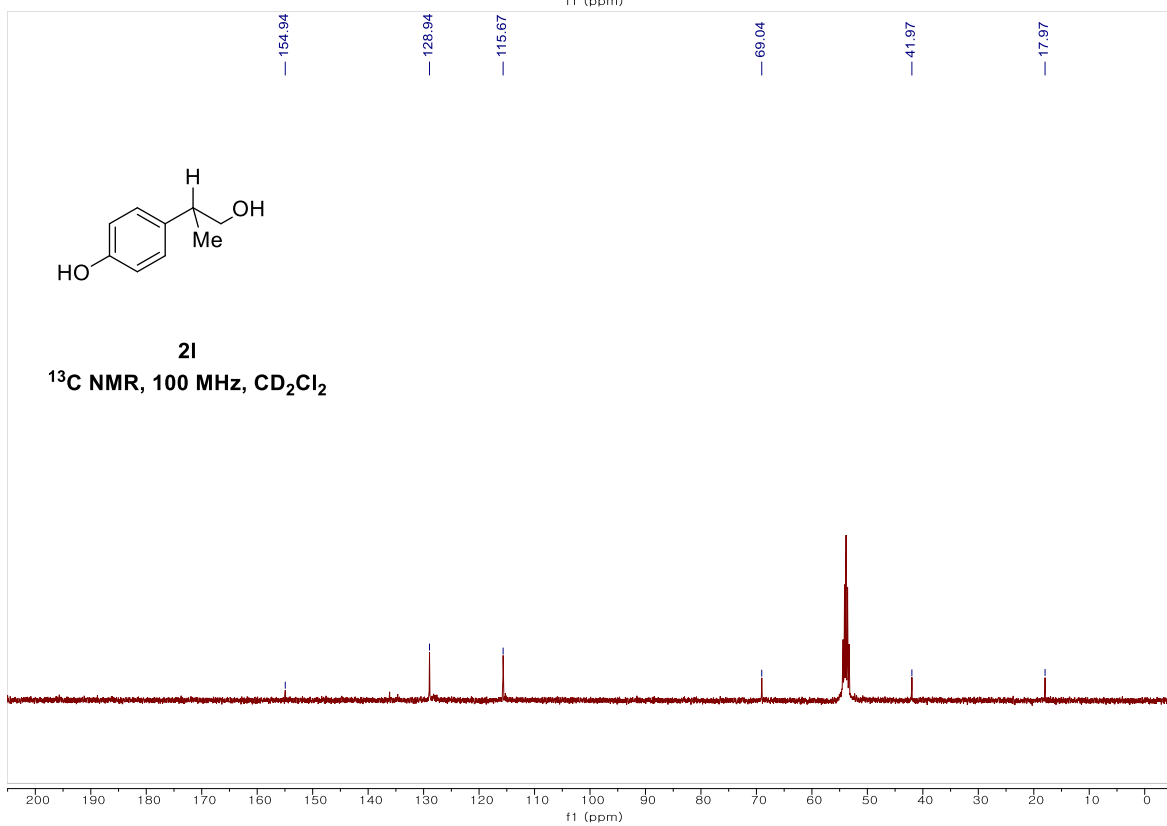

## 2-phenylbutan-1-ol (2m)

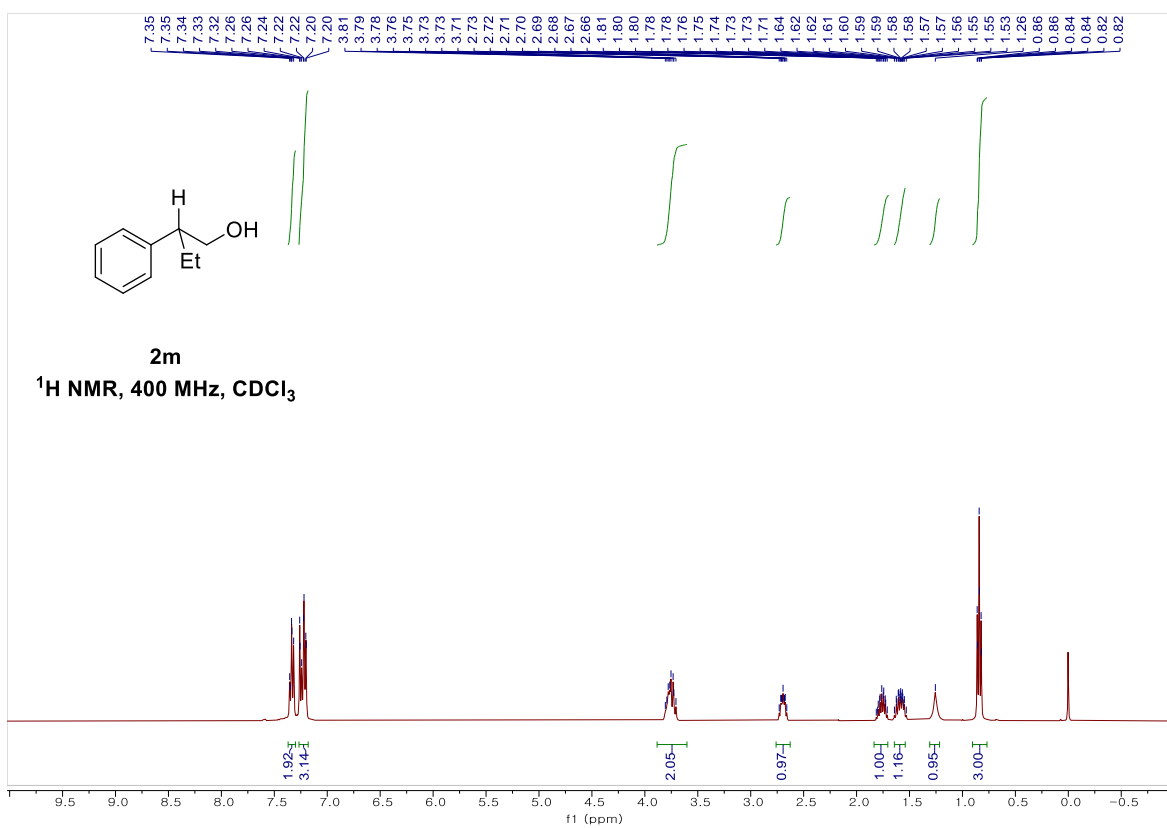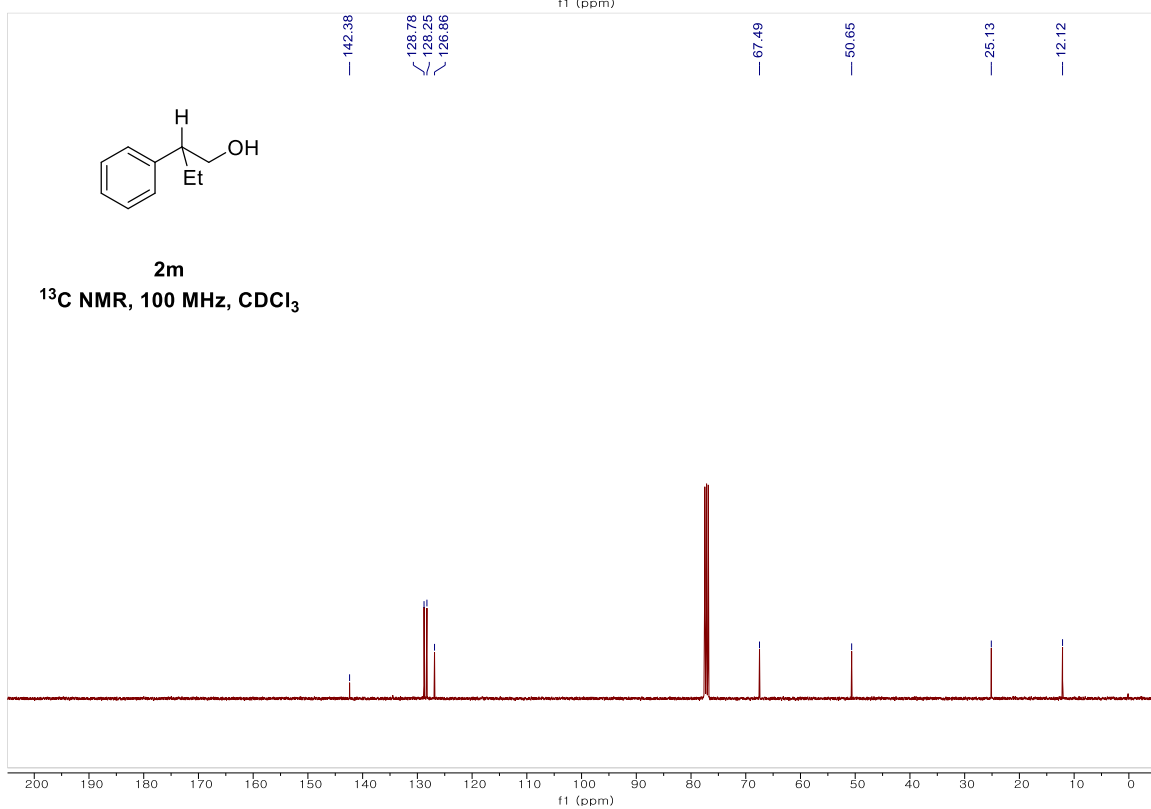

## 2,3-diphenylpropan-1-ol (2n)

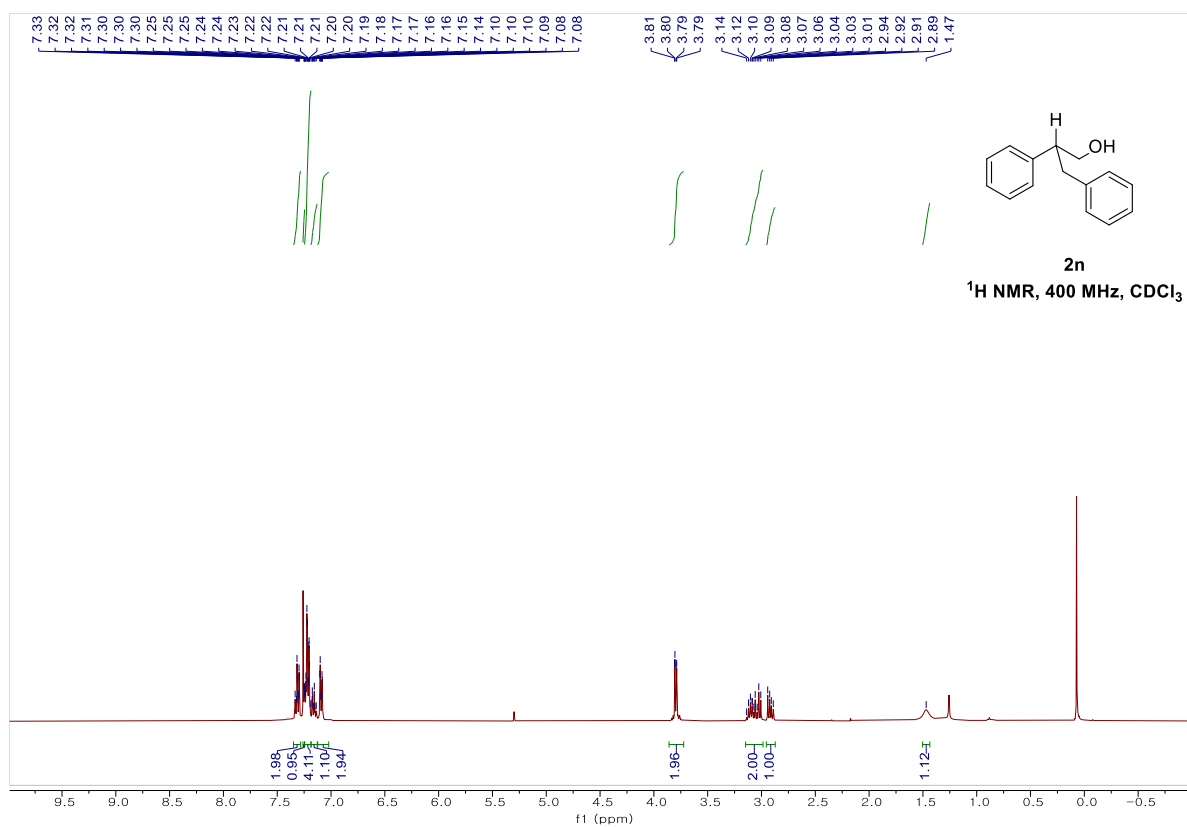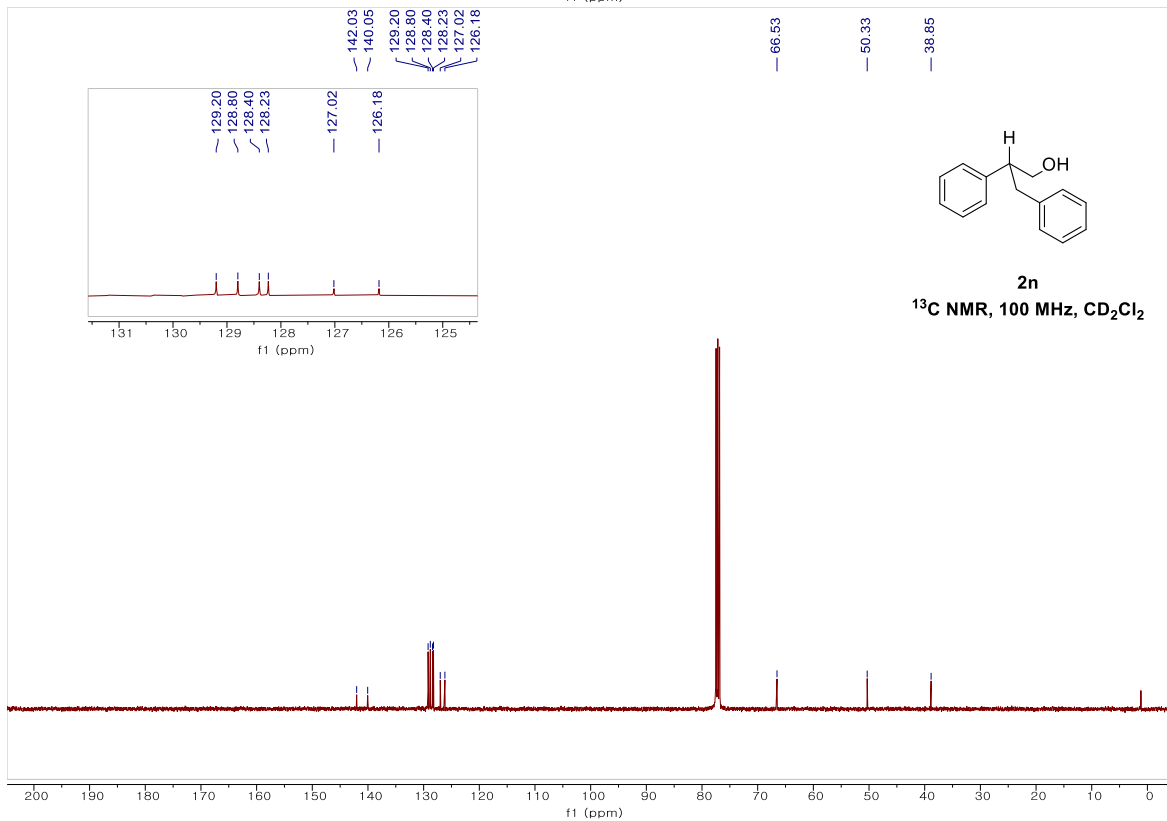

## 2-methyl-4-phenylbutan-1-ol (2o)

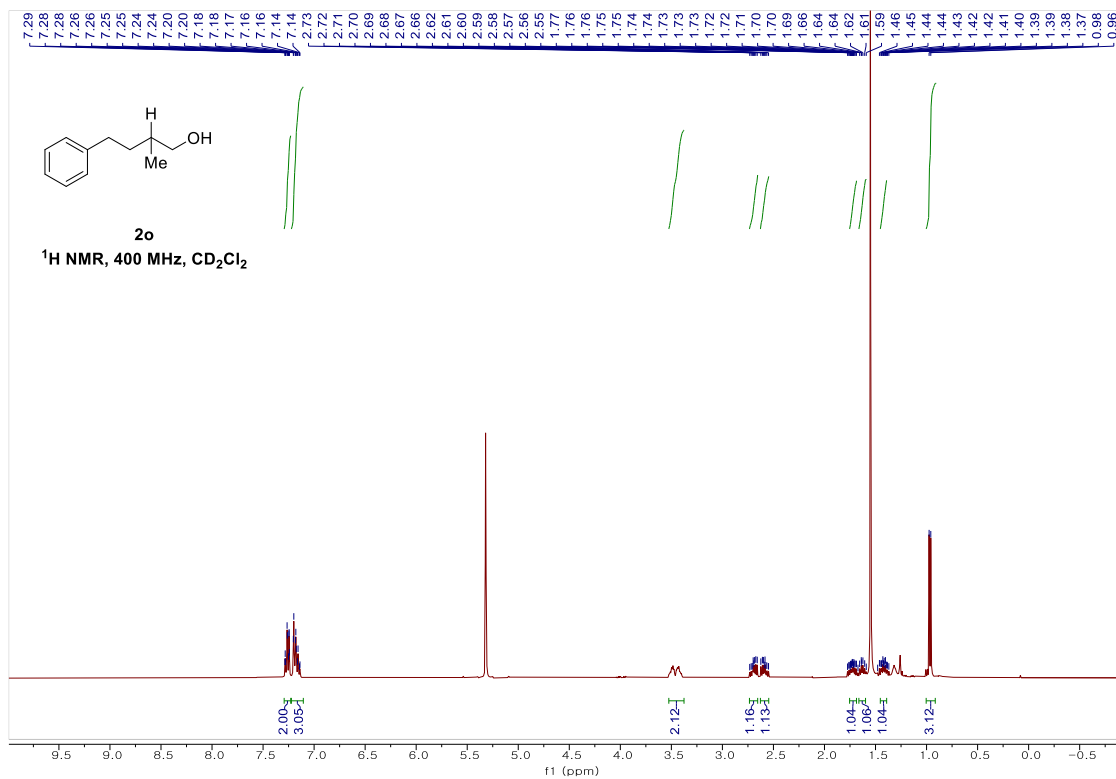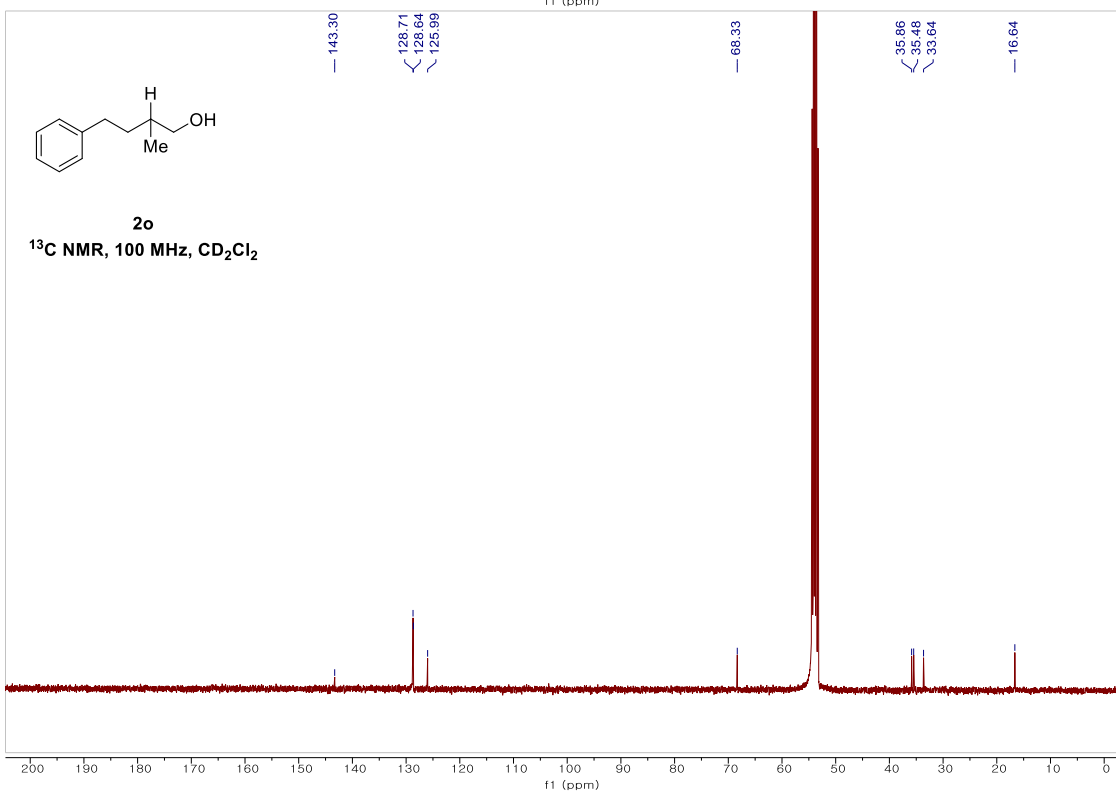

## 2-ethyl-4-phenylbutan-1-ol (2p)

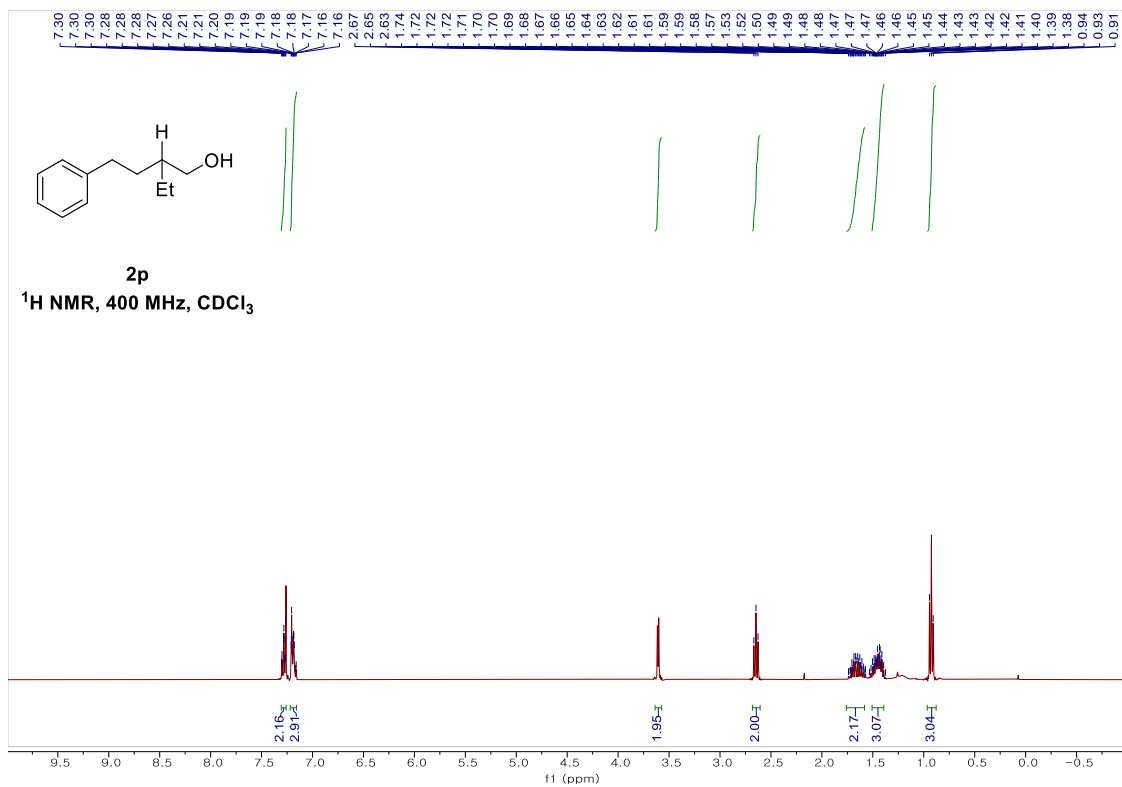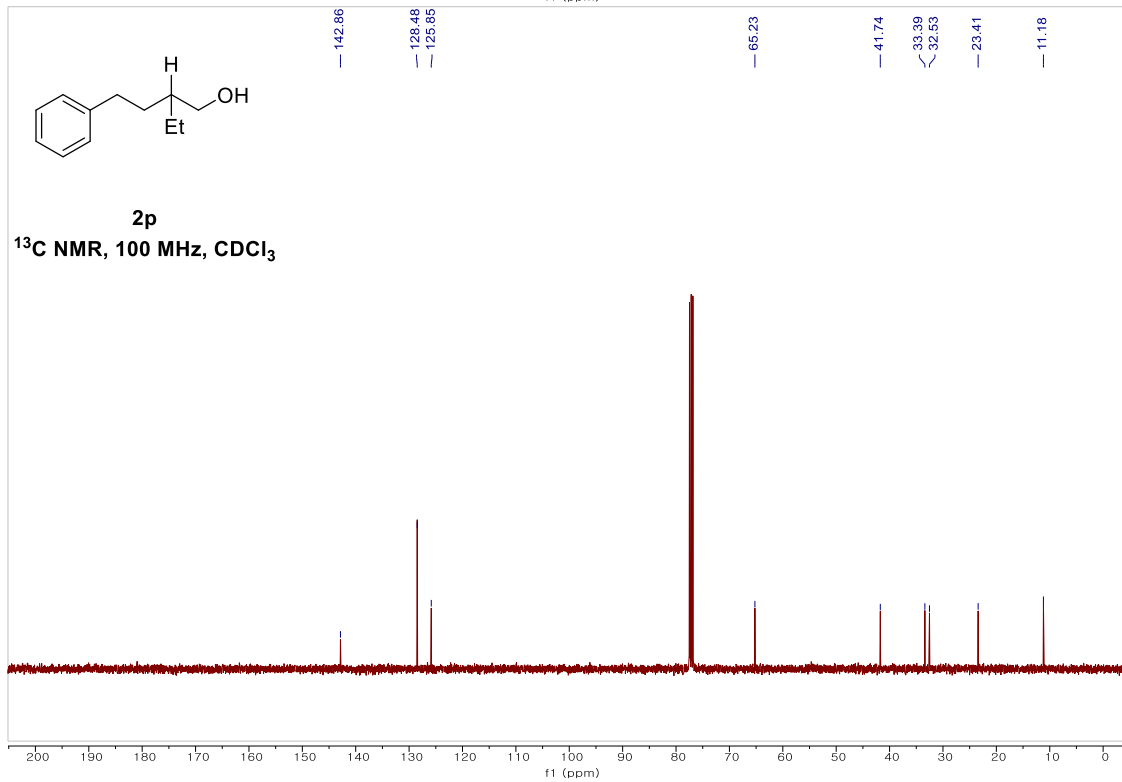

## 2-phenethylpent-4-en-1-ol (2s)

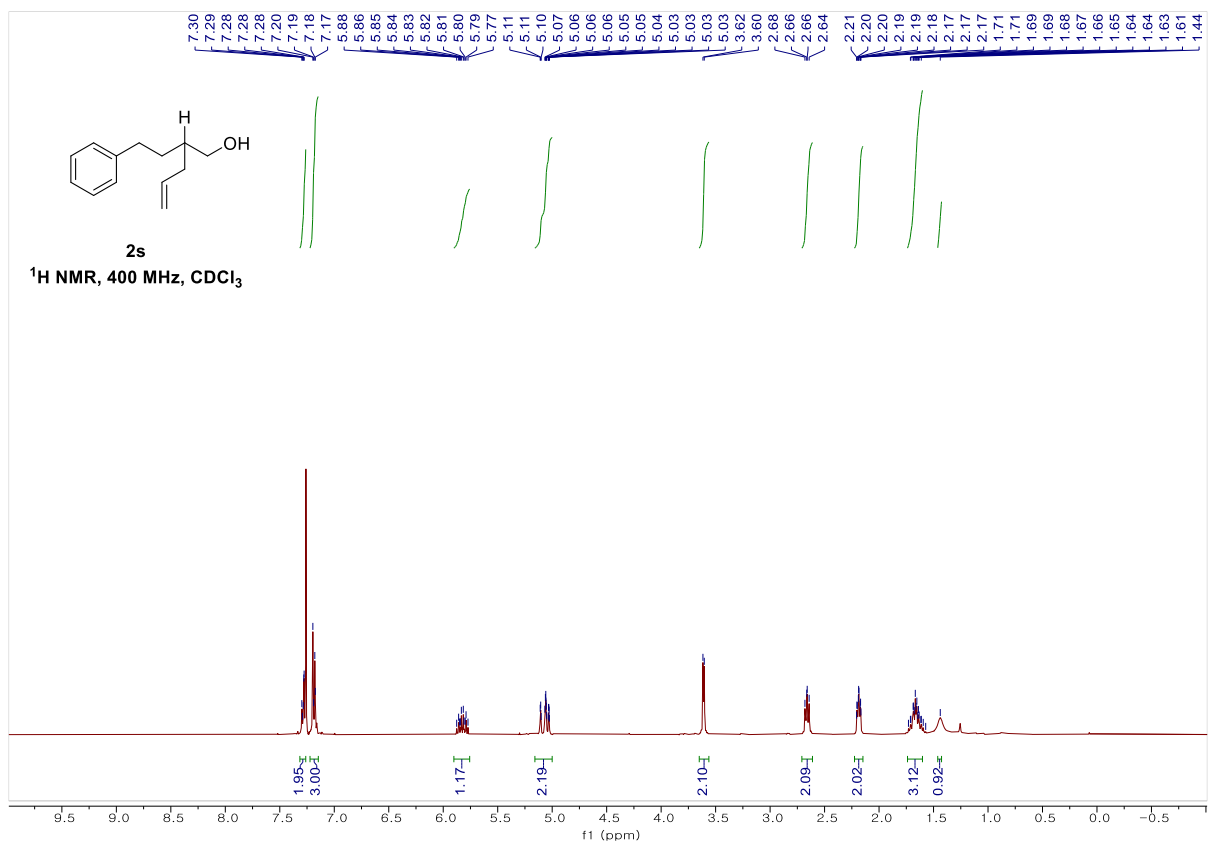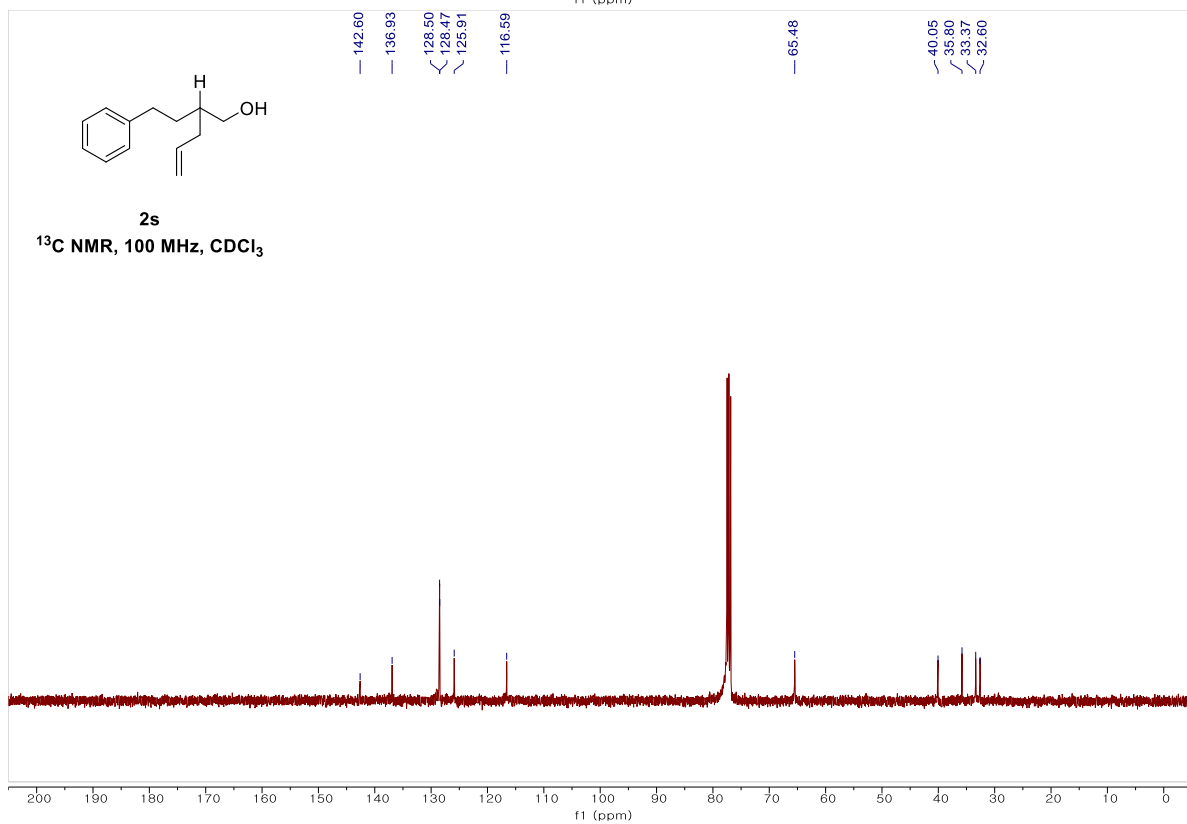

# 1,1-diphenylpropan-2-ol (2t)

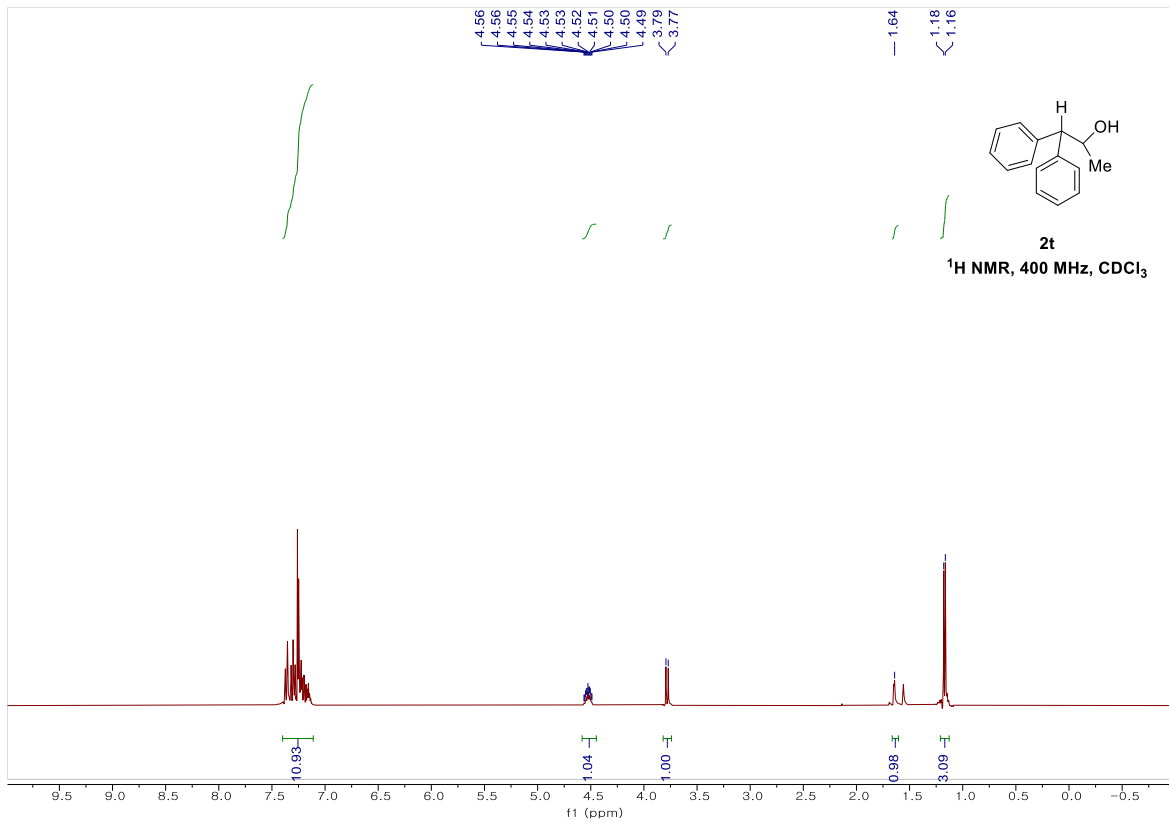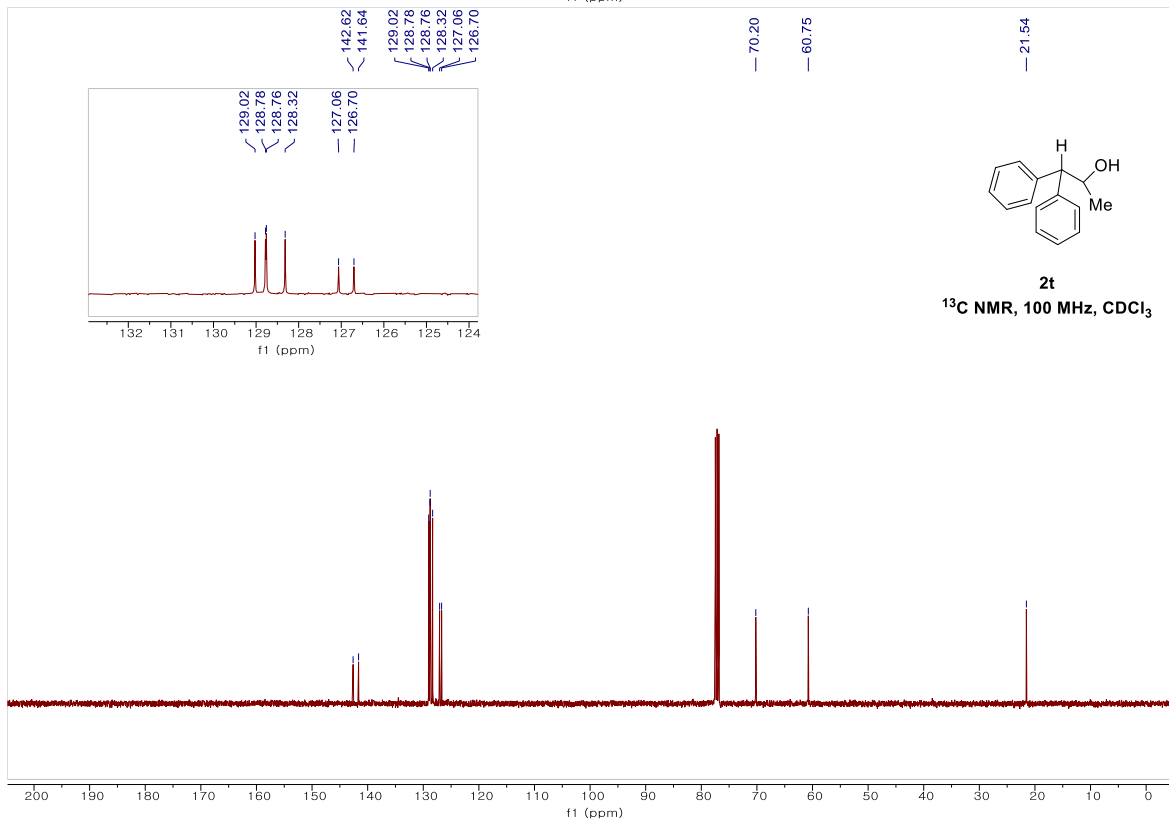

### 3,3-diphenylpropan-1-ol (2v)

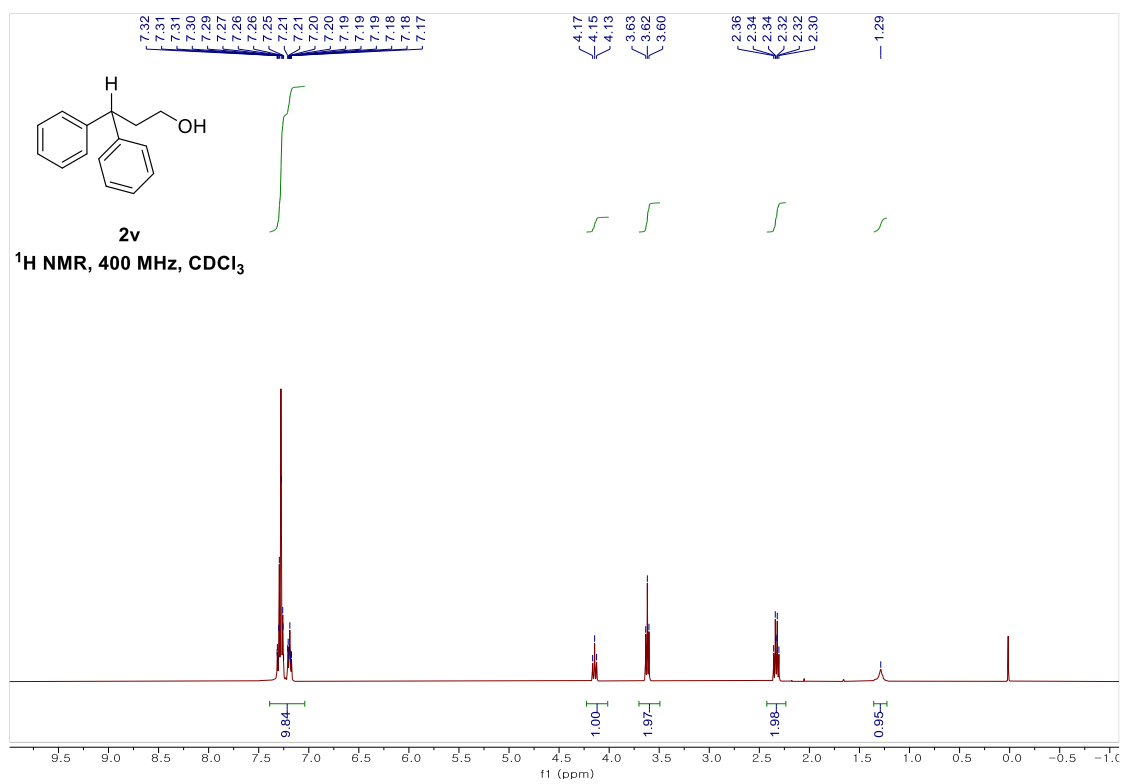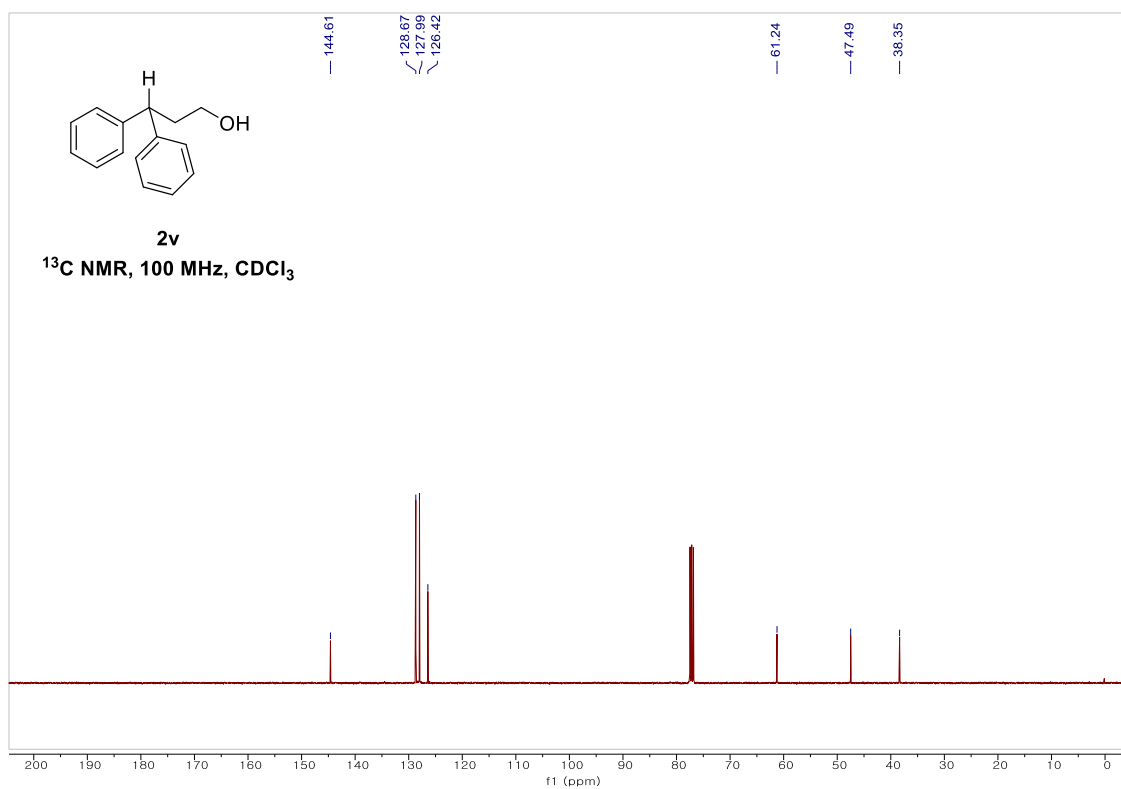

### 3-phenylpropan-1-ol (2x)

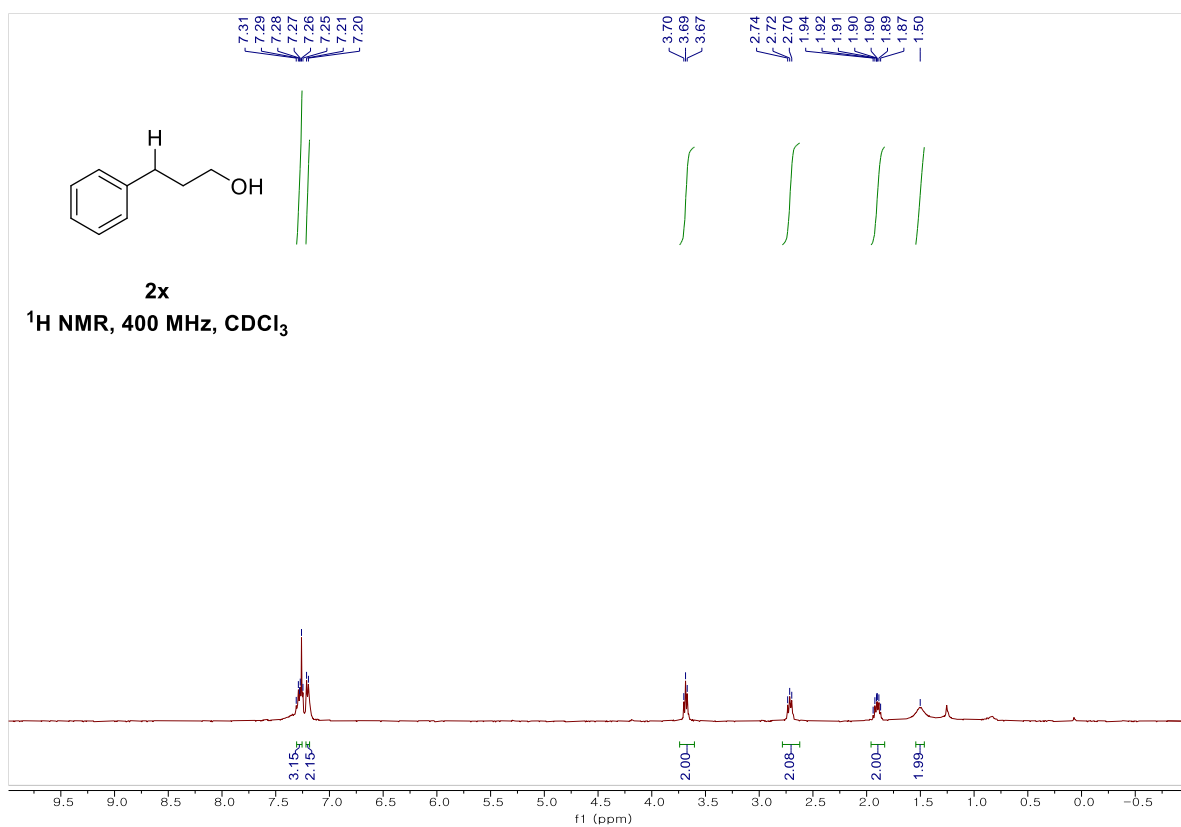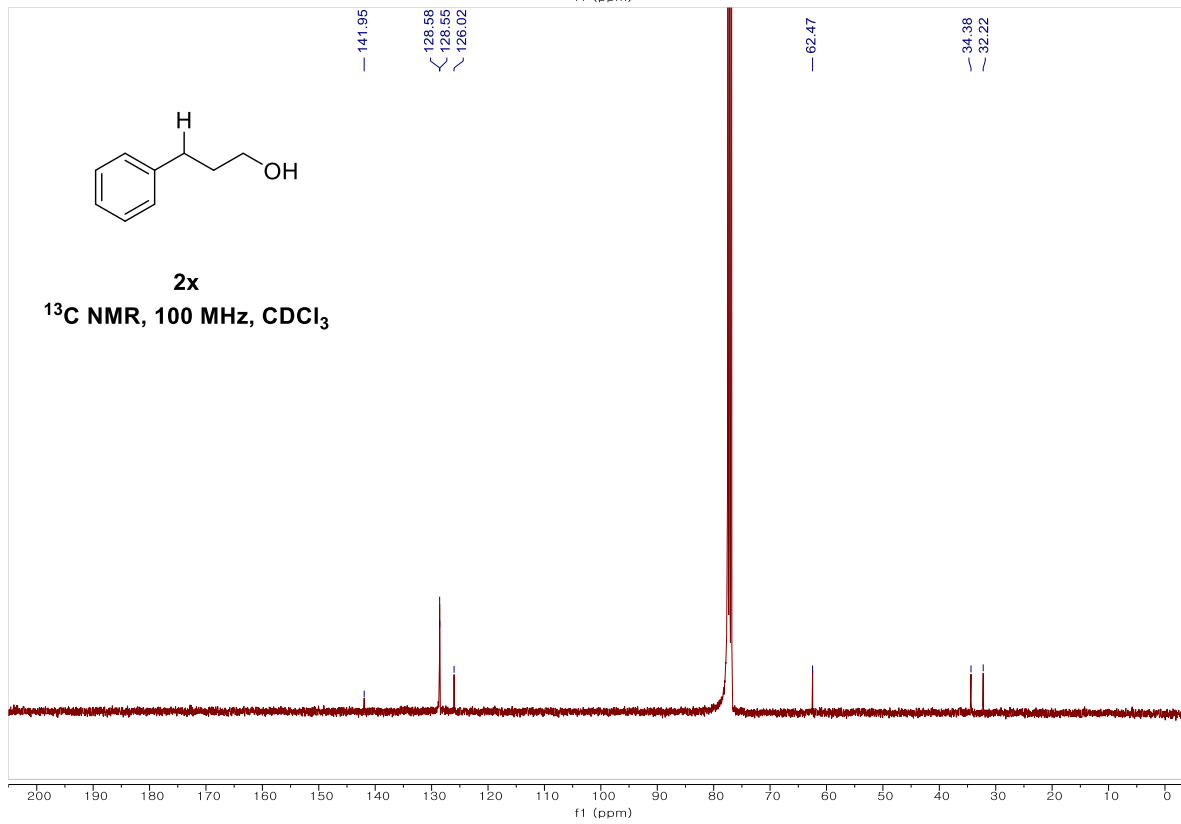

# 1-phenylpropan-1-ol (2x')

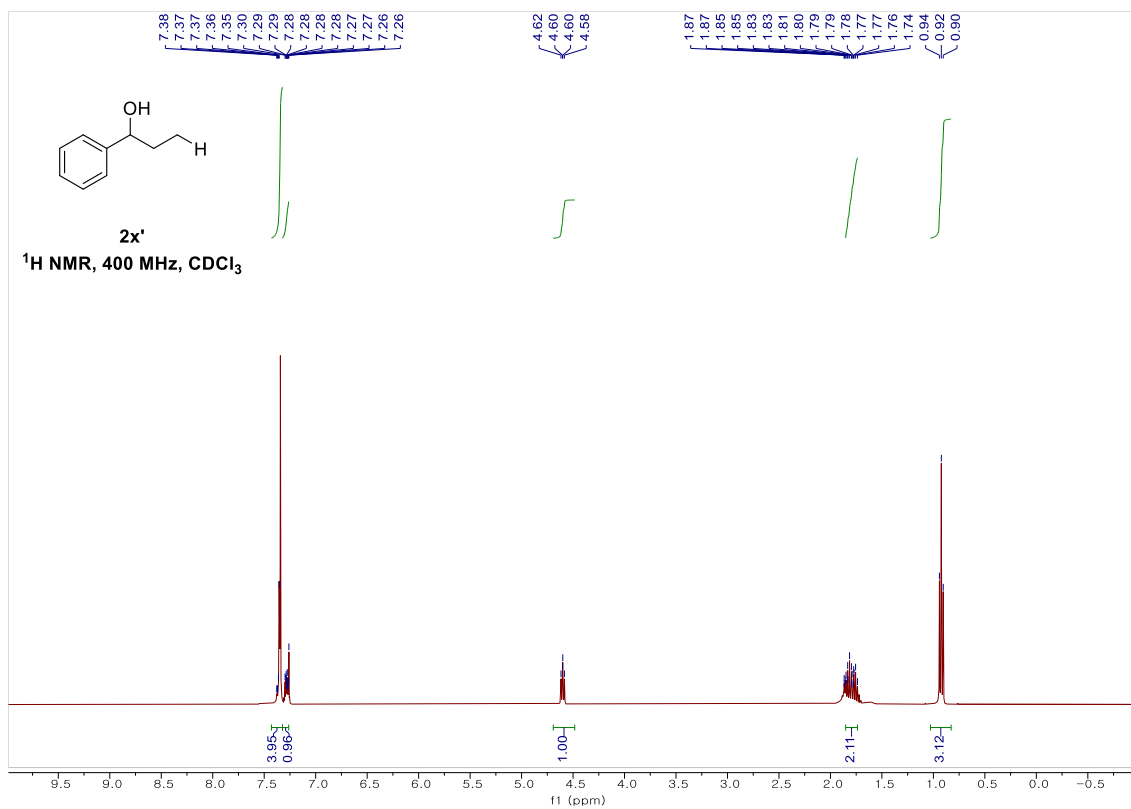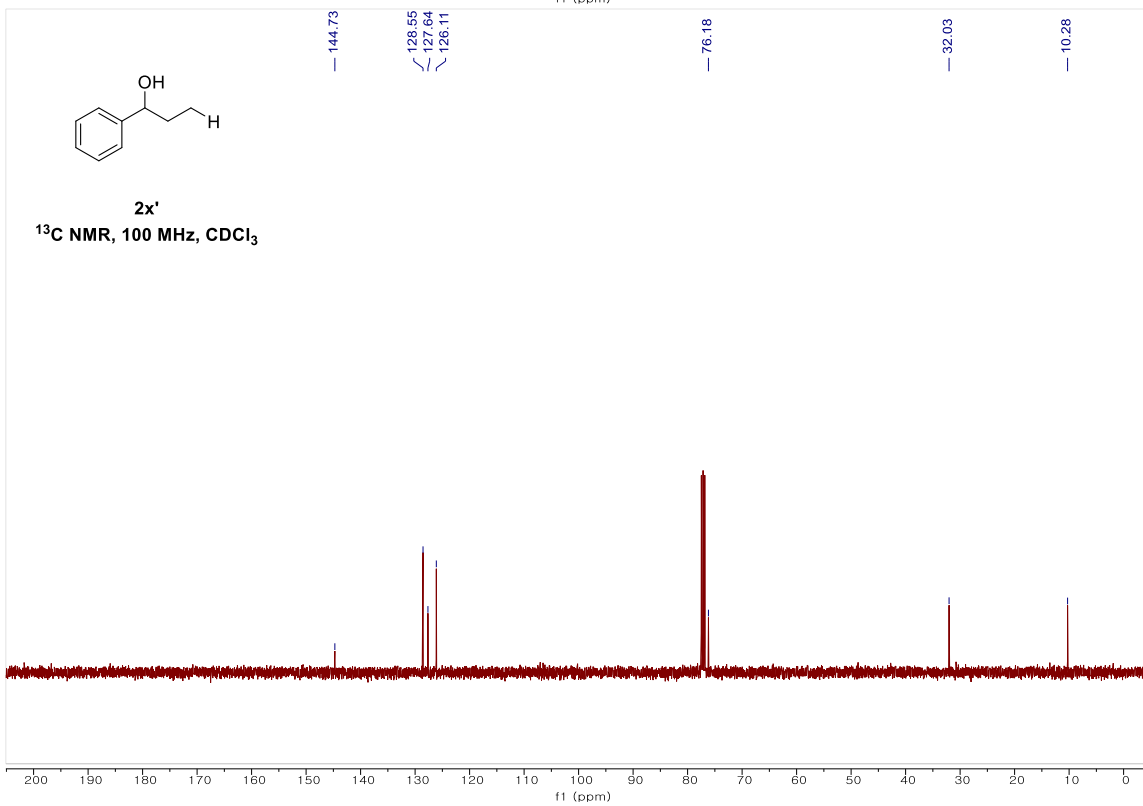

# 1-phenylpropan-2-ol (2y)

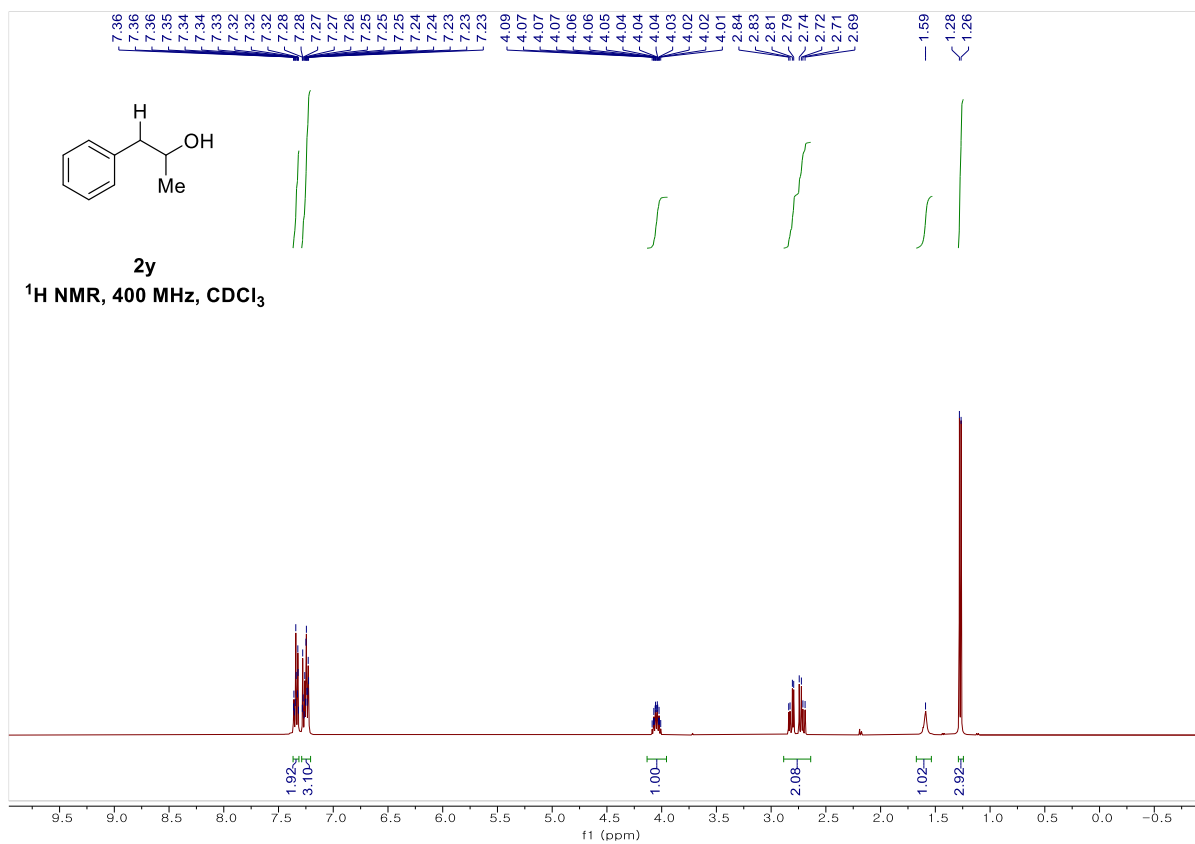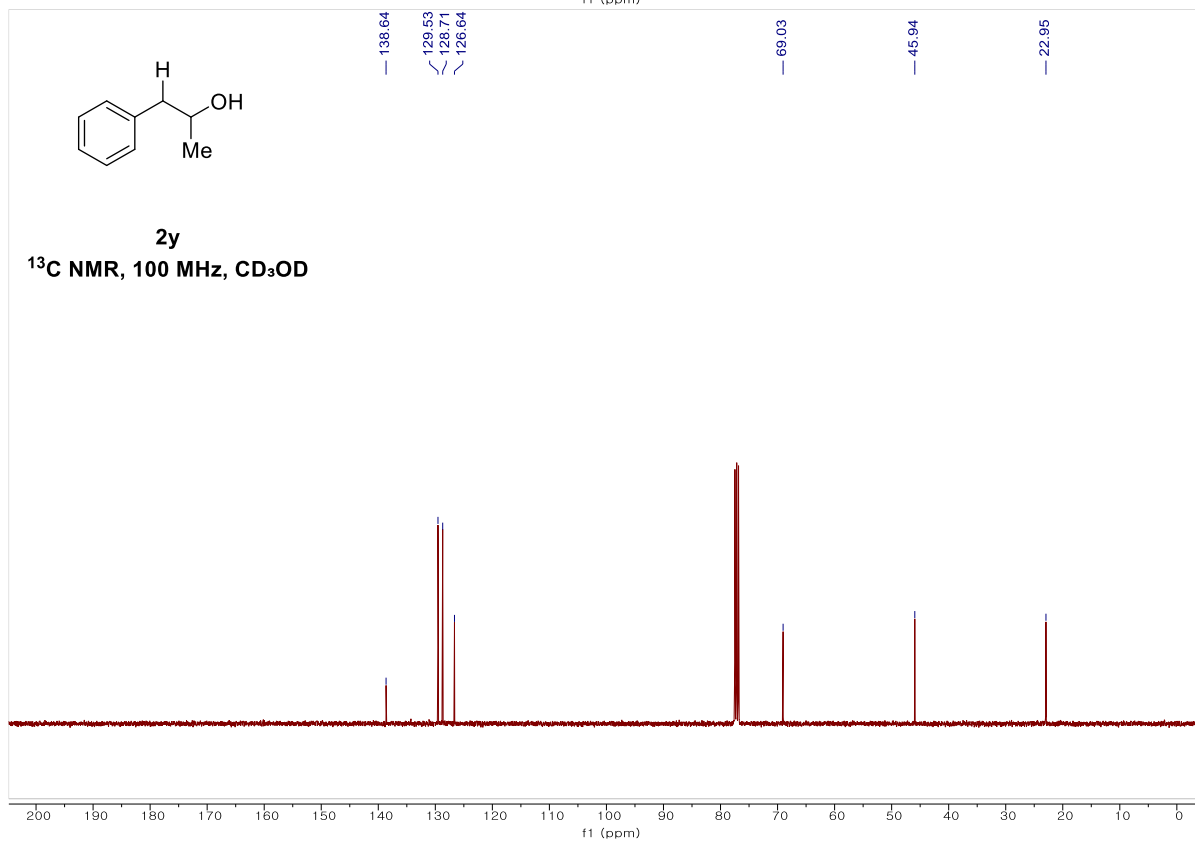

# 1-(4-methoxyphenyl)propan-2-ol (2z)

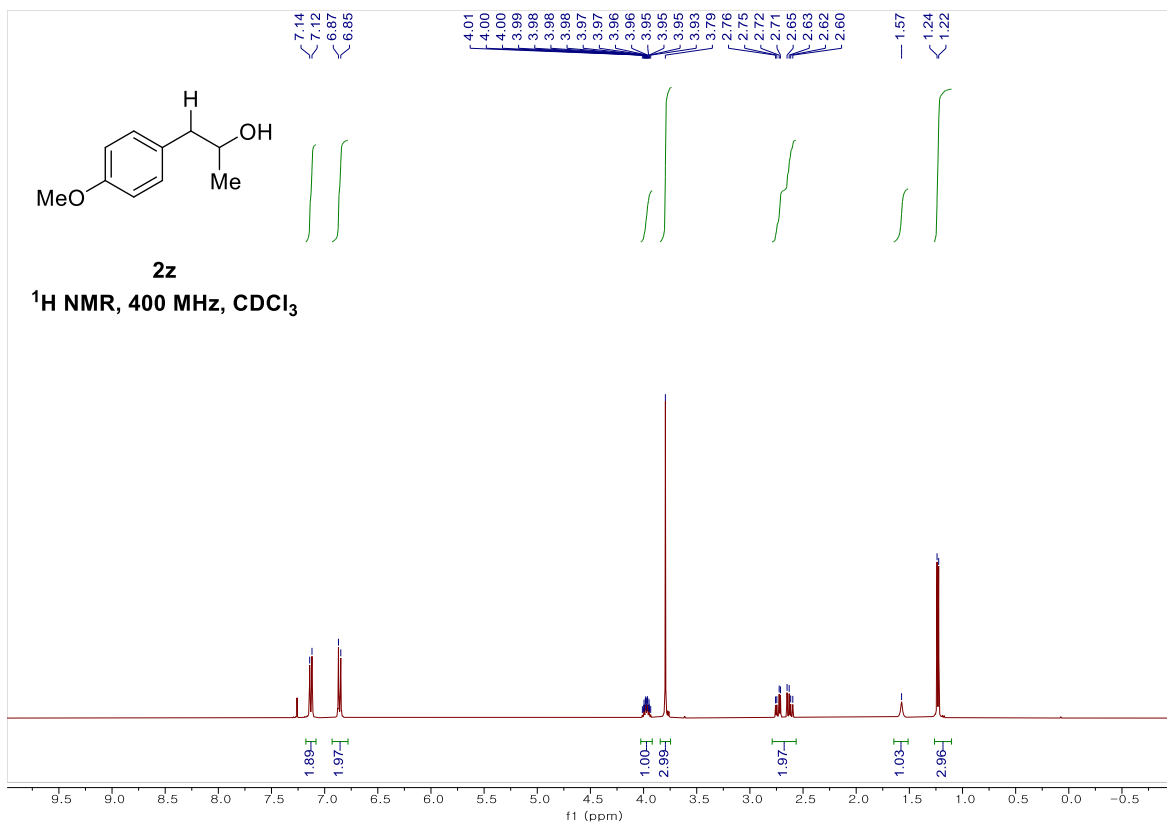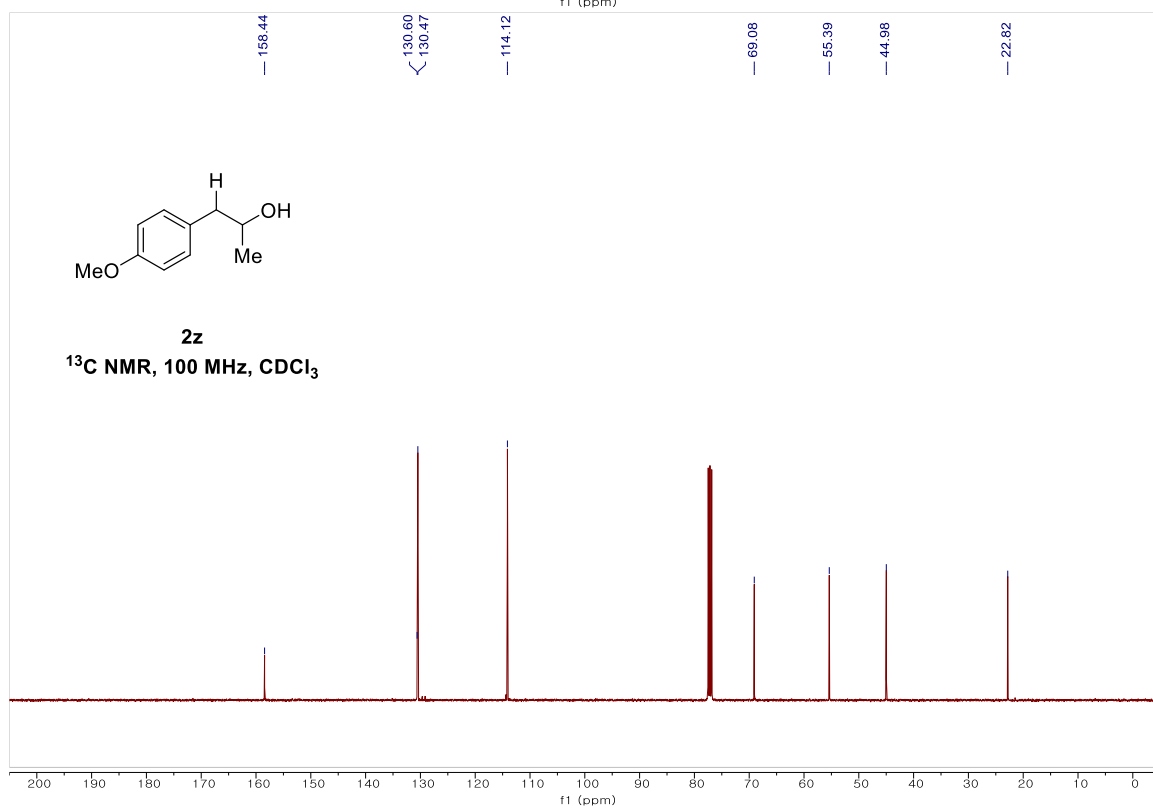

# 1-(benzo[d][1,3]dioxol-5-yl)propan-1-ol (2aa)

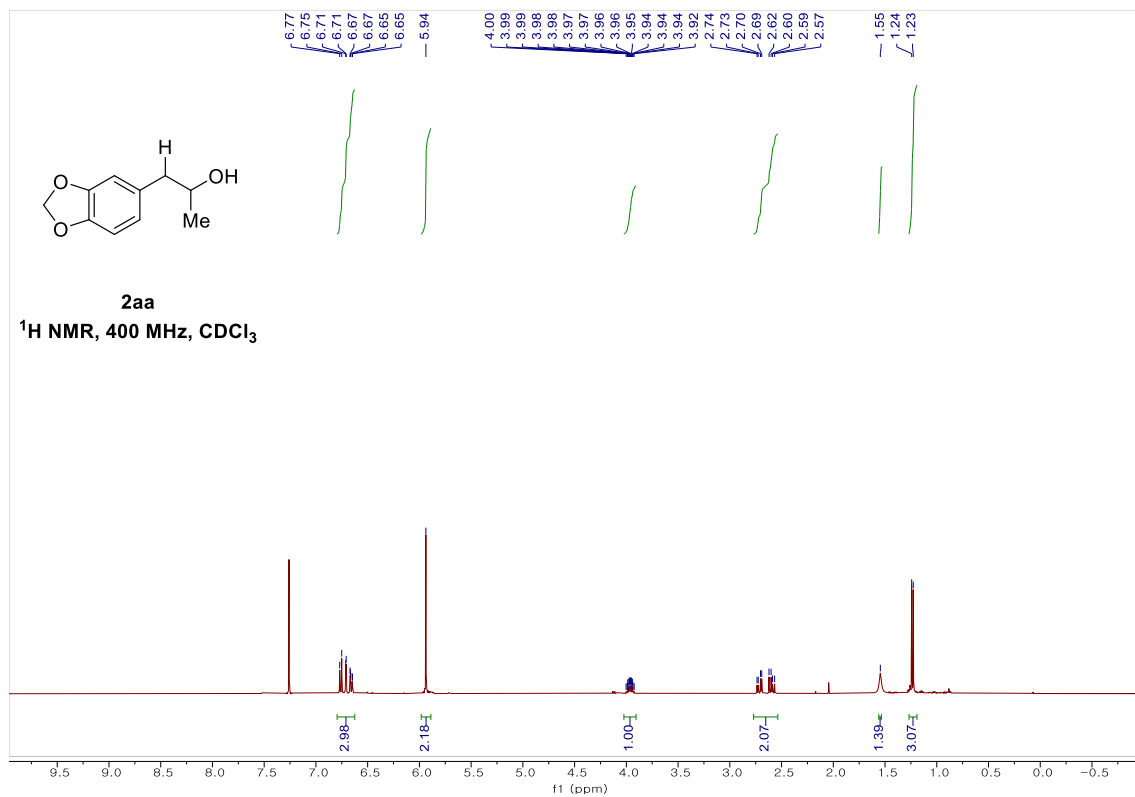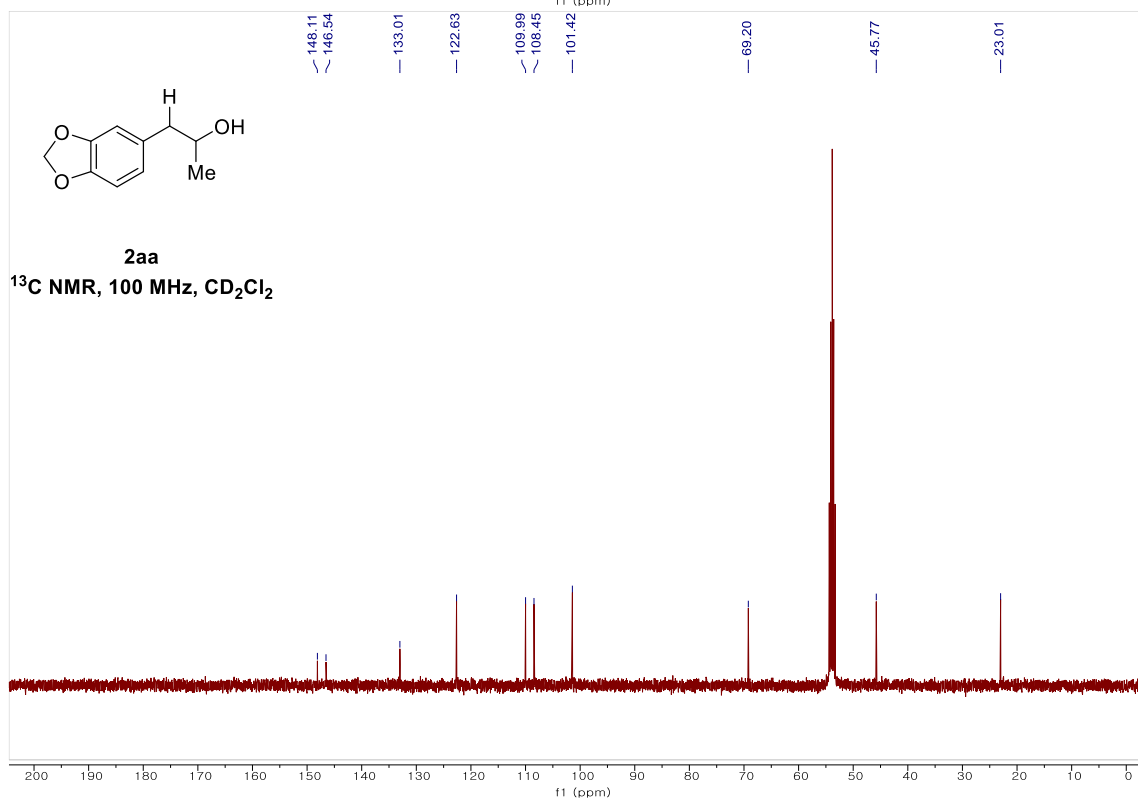

### 4-(2-hydroxypropyl)-2-methoxyphenol (2ab)

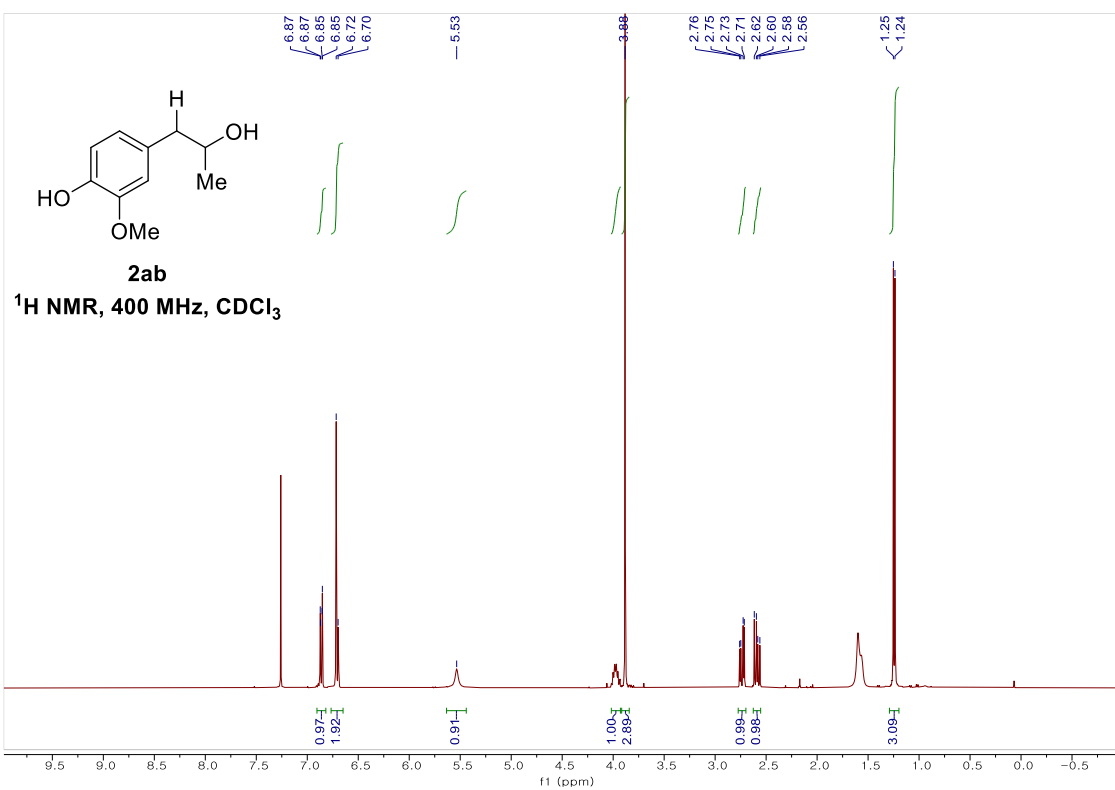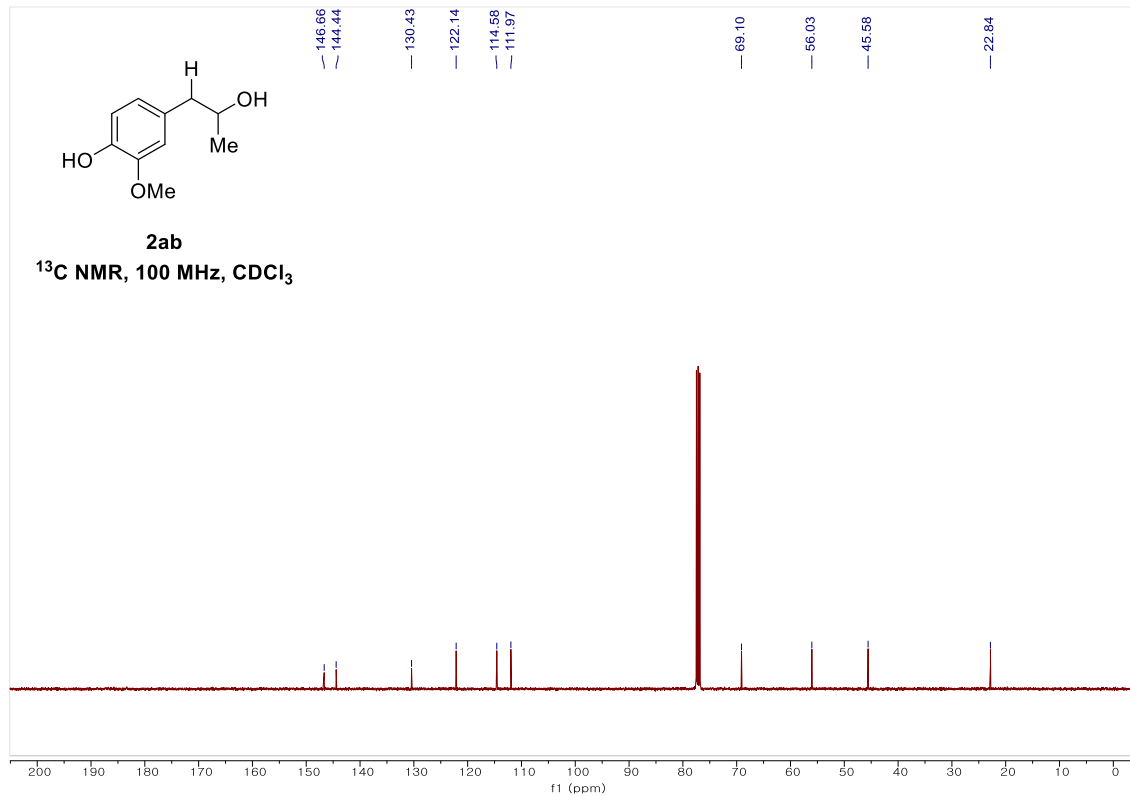

# 1-(benzo[d][1,3]dioxol-5-yl)-4,4-dimethylpentane-2,3-diol (2ac)

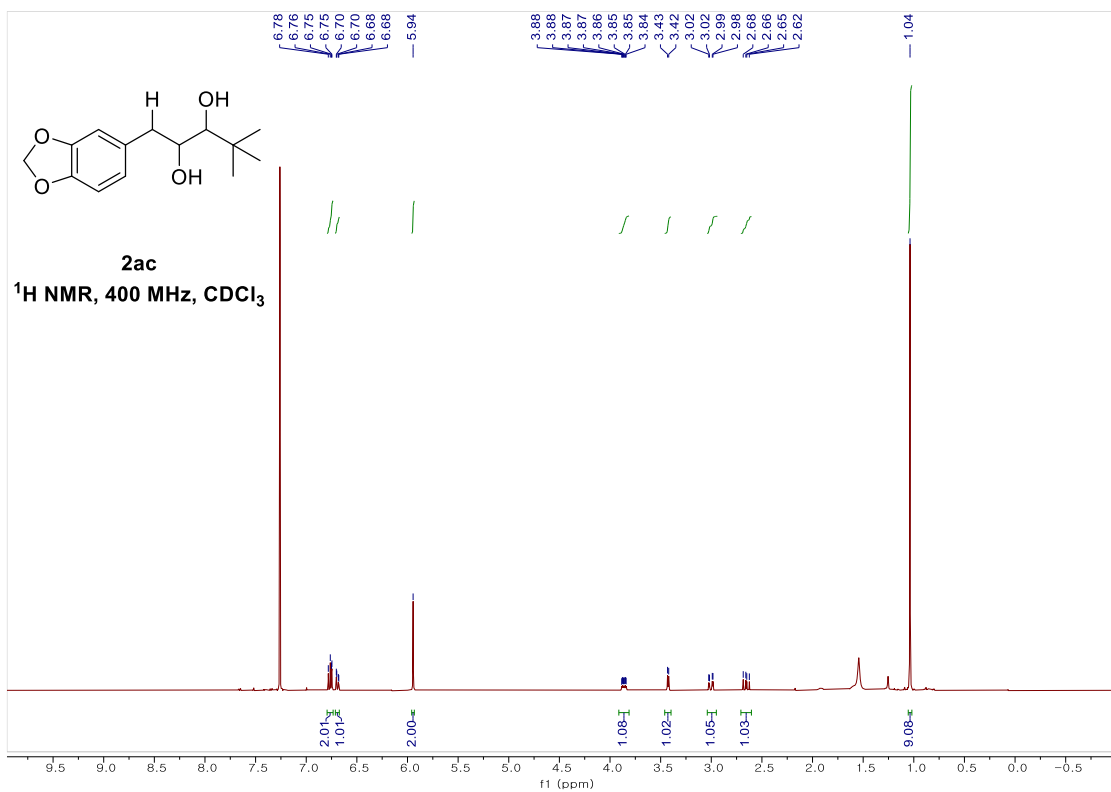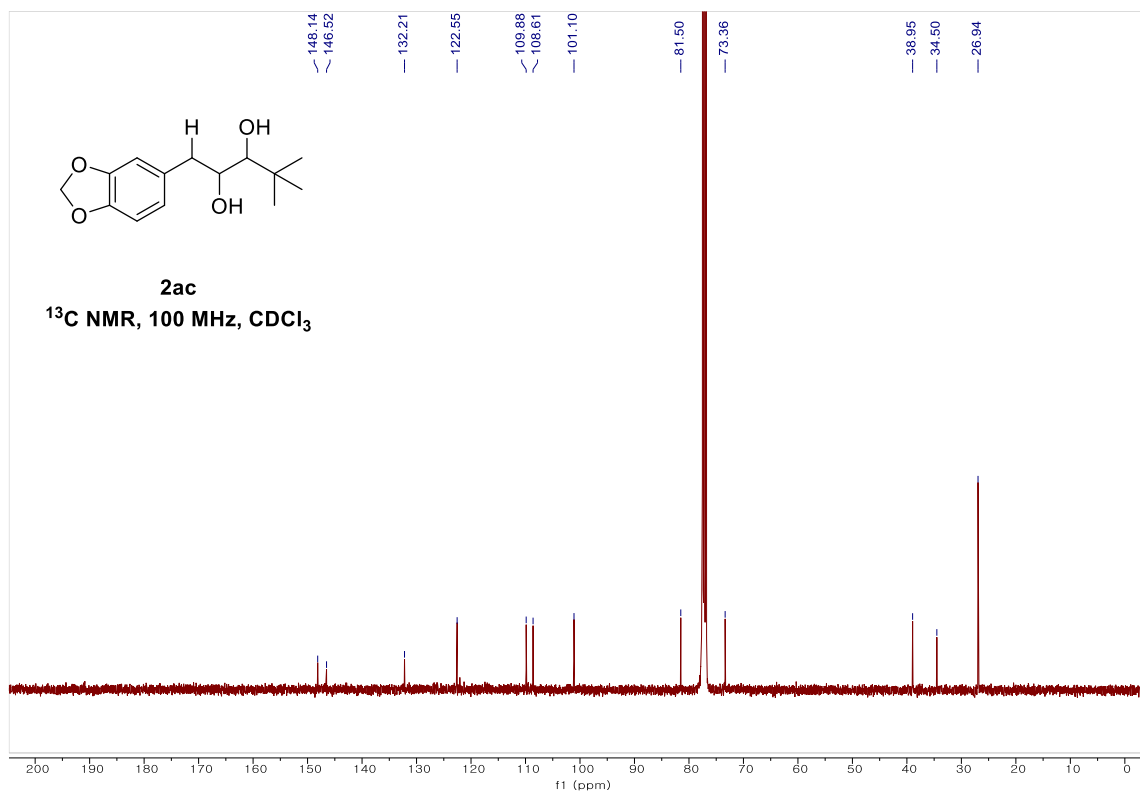

## 2,2-diphenylethan-2-d-1-ol (3a)

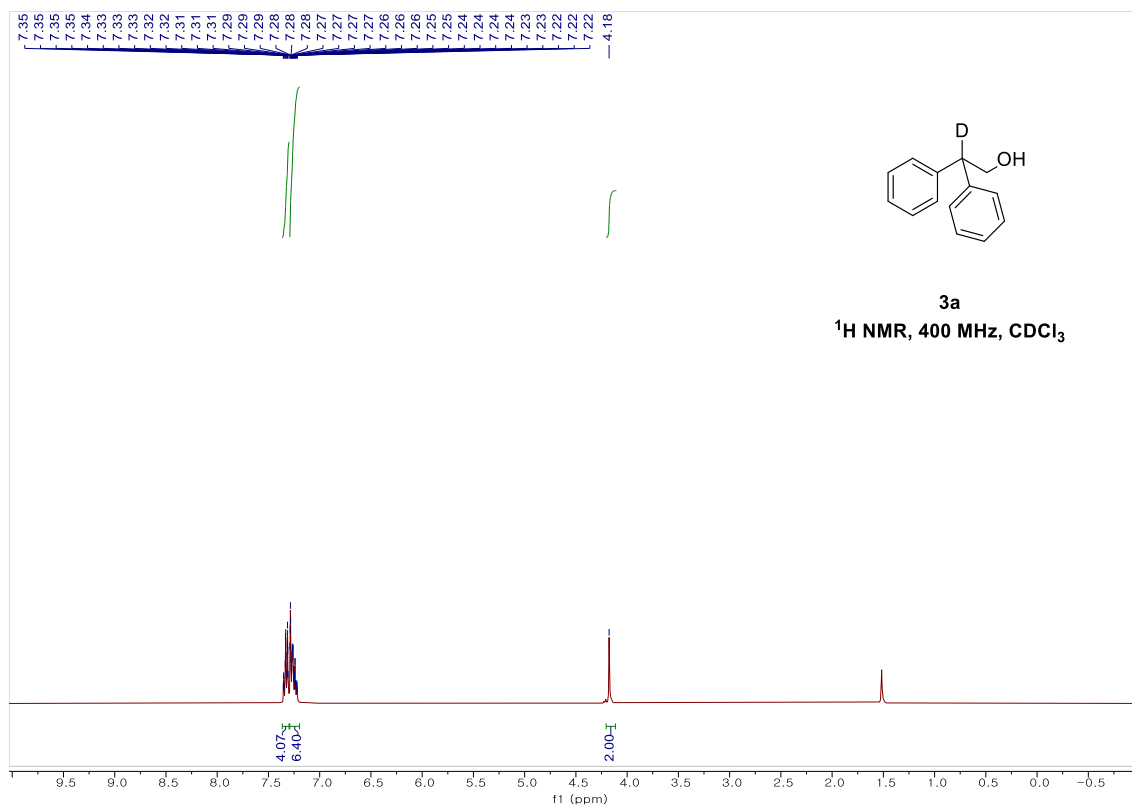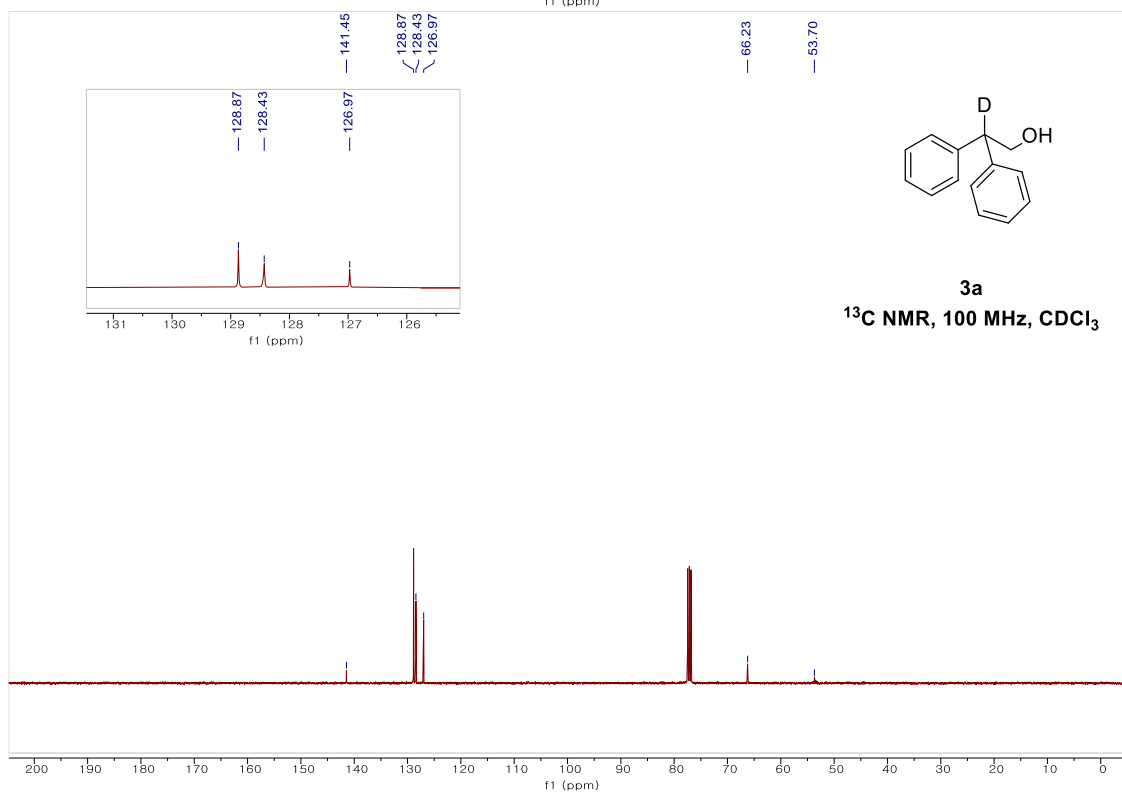

## 2-(4-fluorophenyl)-2-phenylethan-2-d-1-ol (3c)

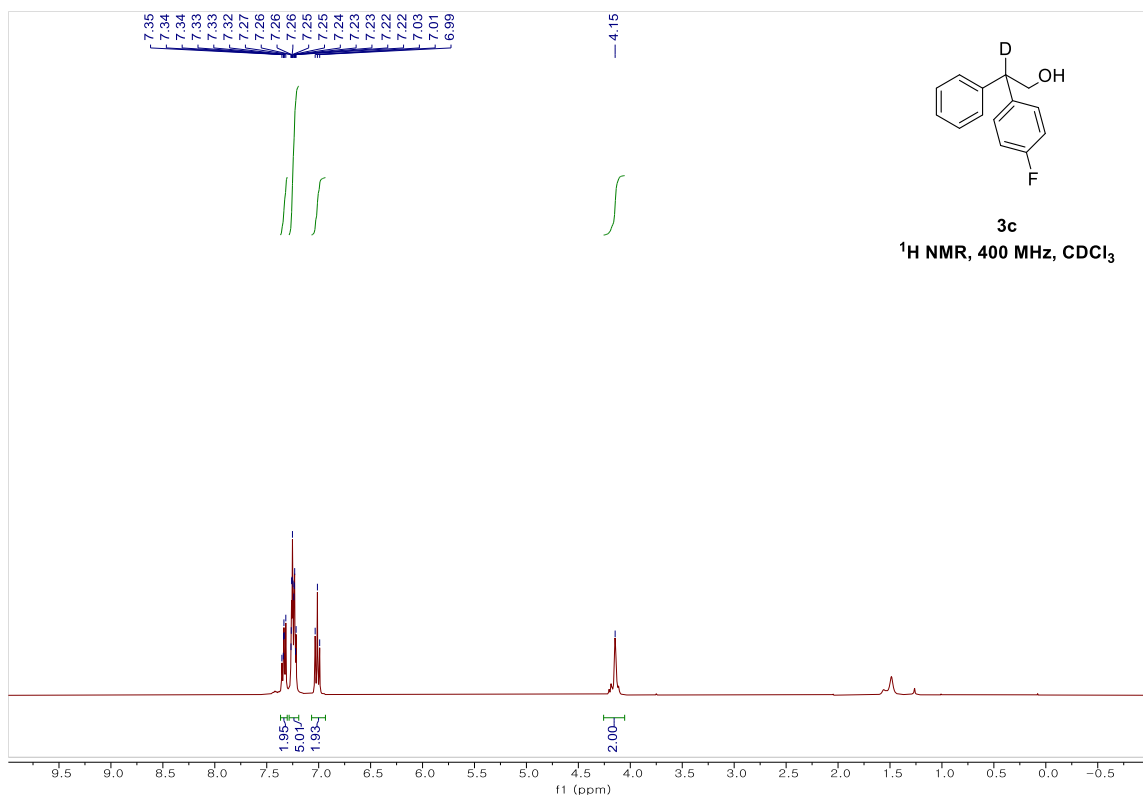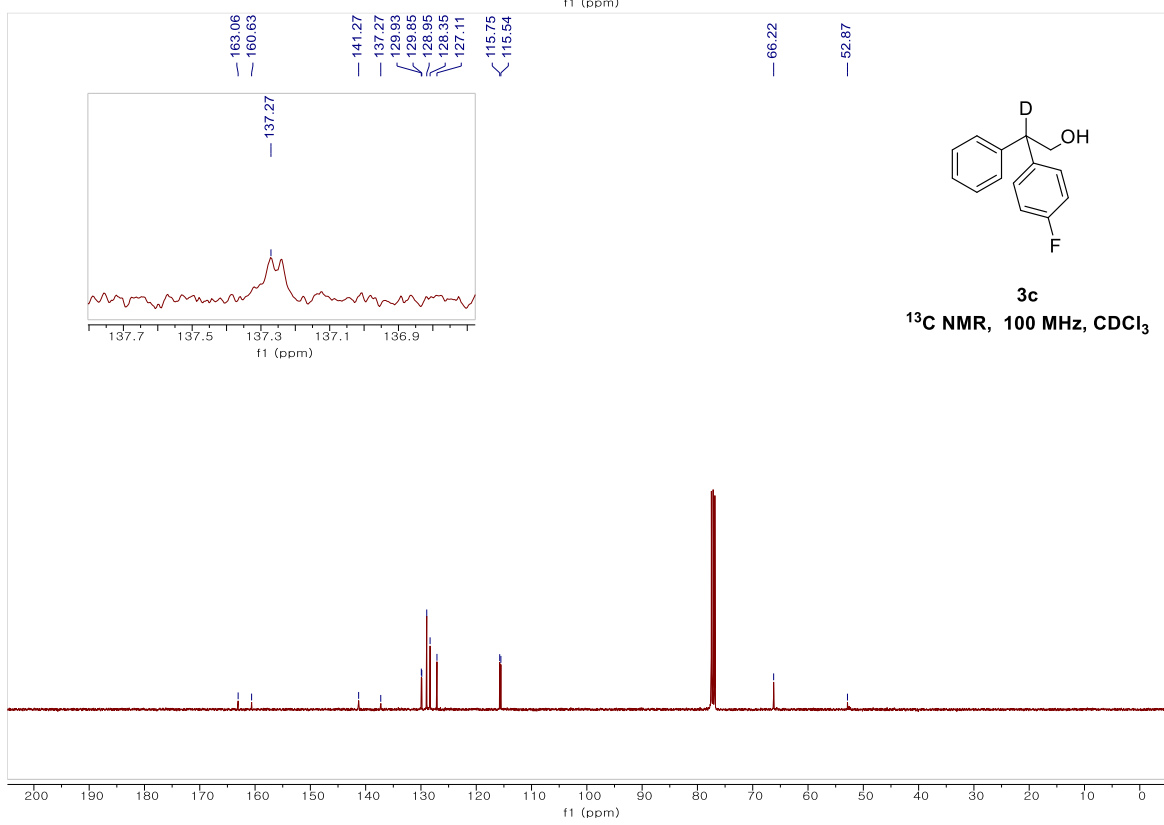

## 2-phenyl-2-(p-tolyl)ethan-2-d-1-ol (3d)

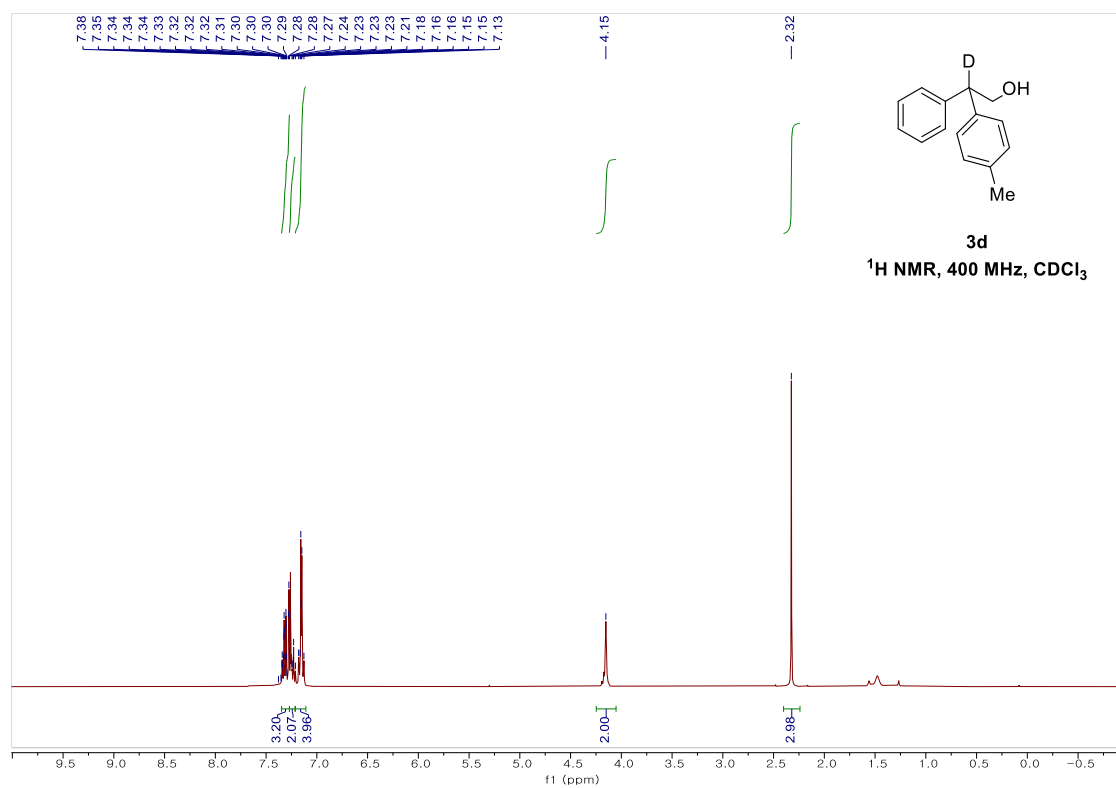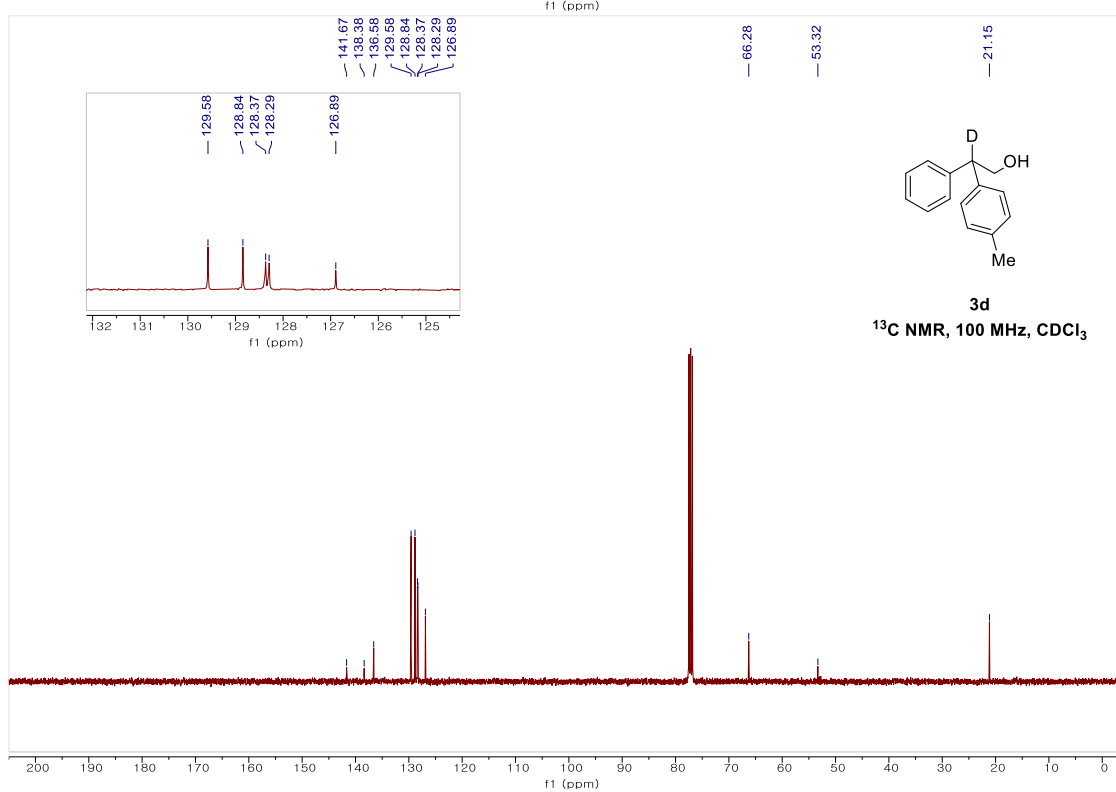

## 2-(4-methoxyphenyl)-2-phenylethan-2-d-1-ol (3e)

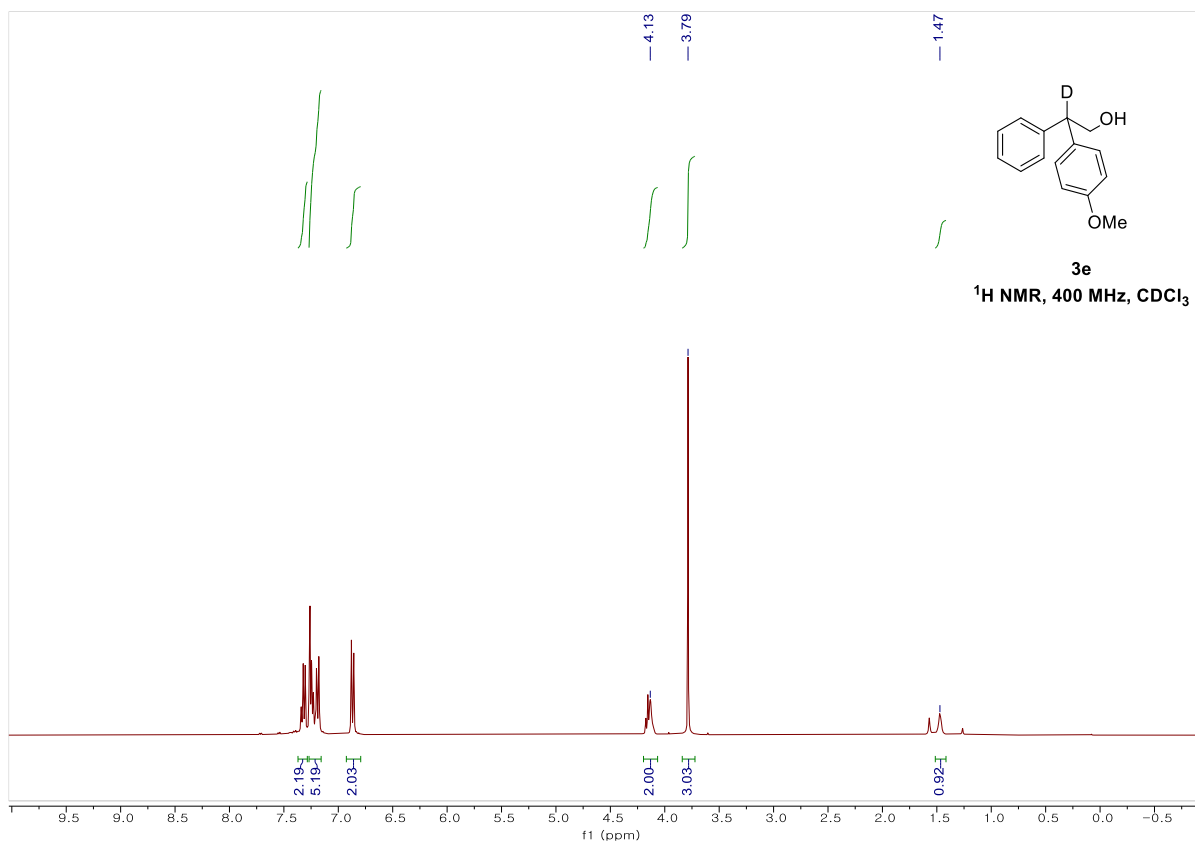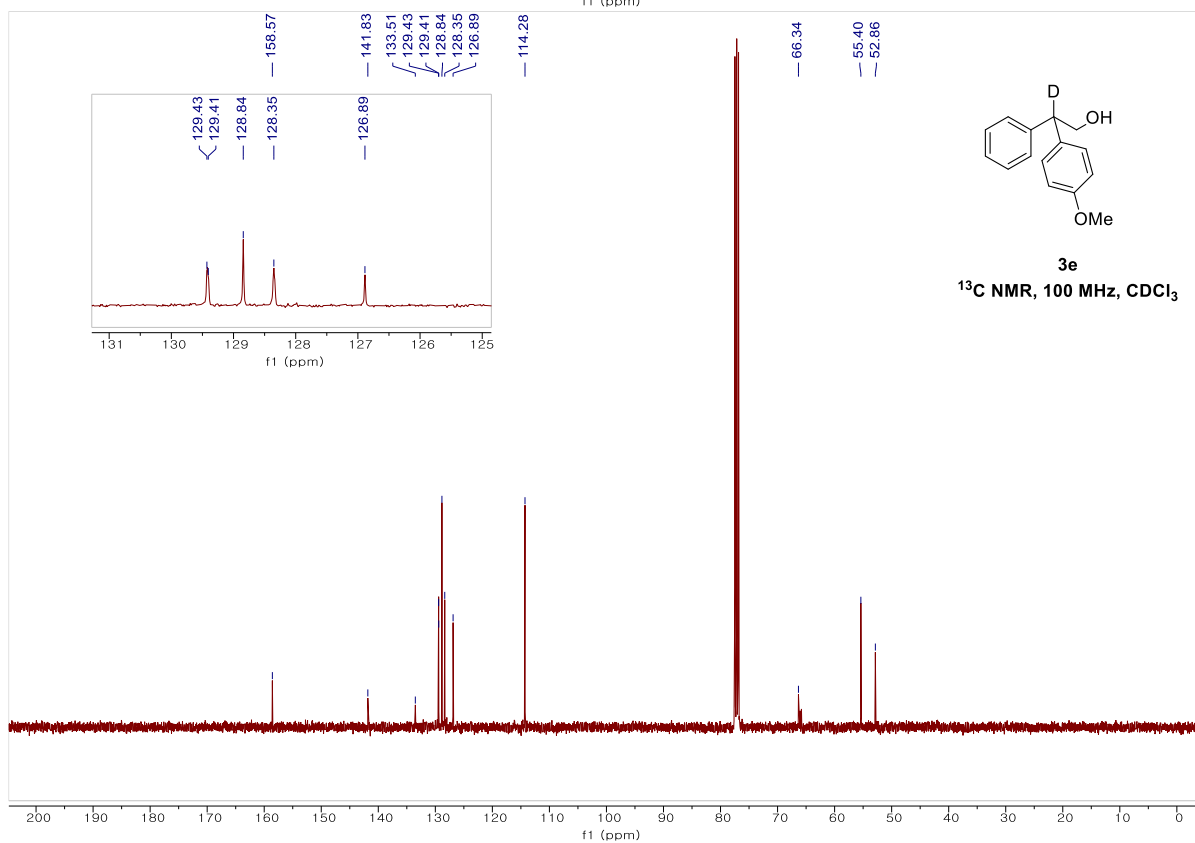

## 2-(4-((tert-butyldimethylsilyloxy)phenyl)-2-phenylethan-2-d-1-ol (3f)

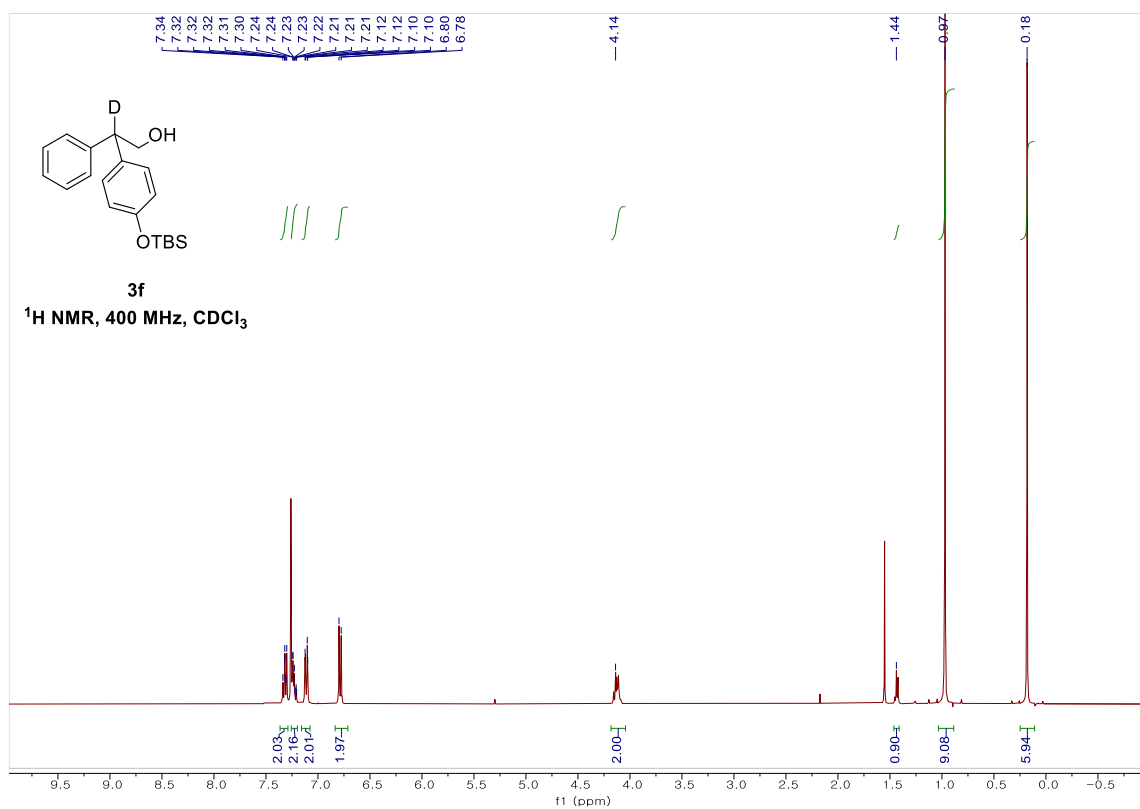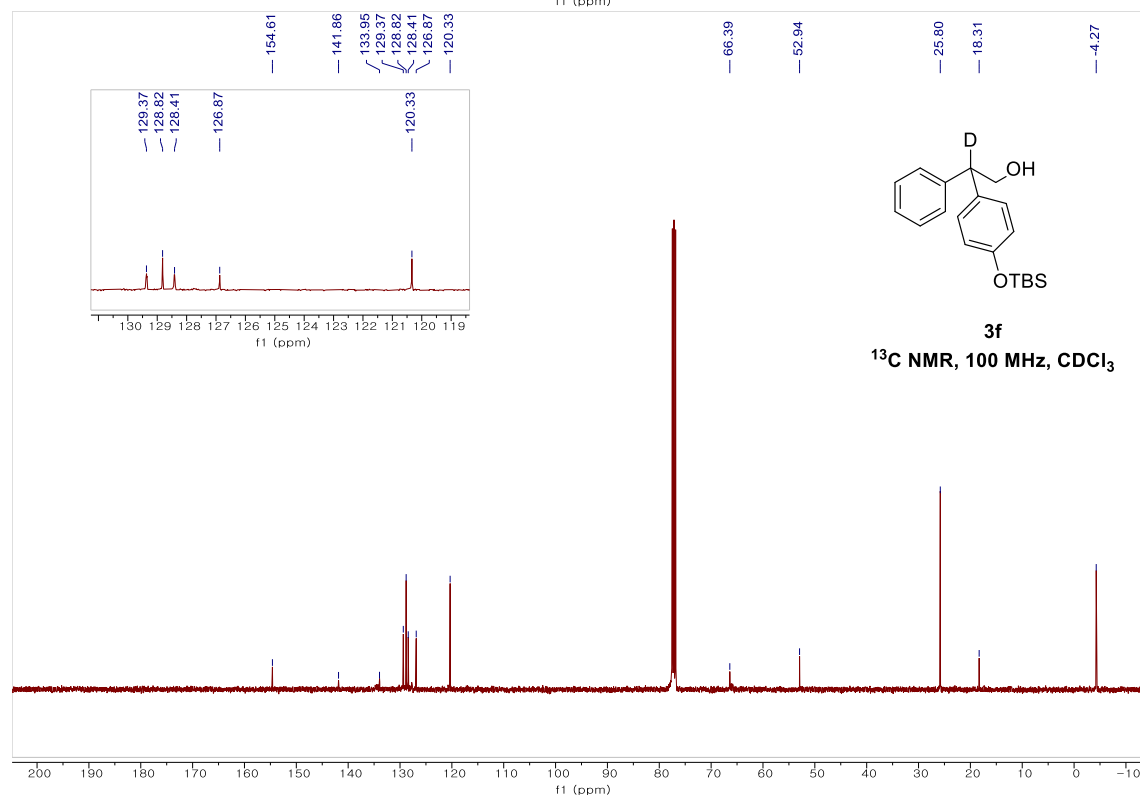

## 2-([1,1'-biphenyl]-4-yl)-2-phenylethan-2-d-1-ol (3g)

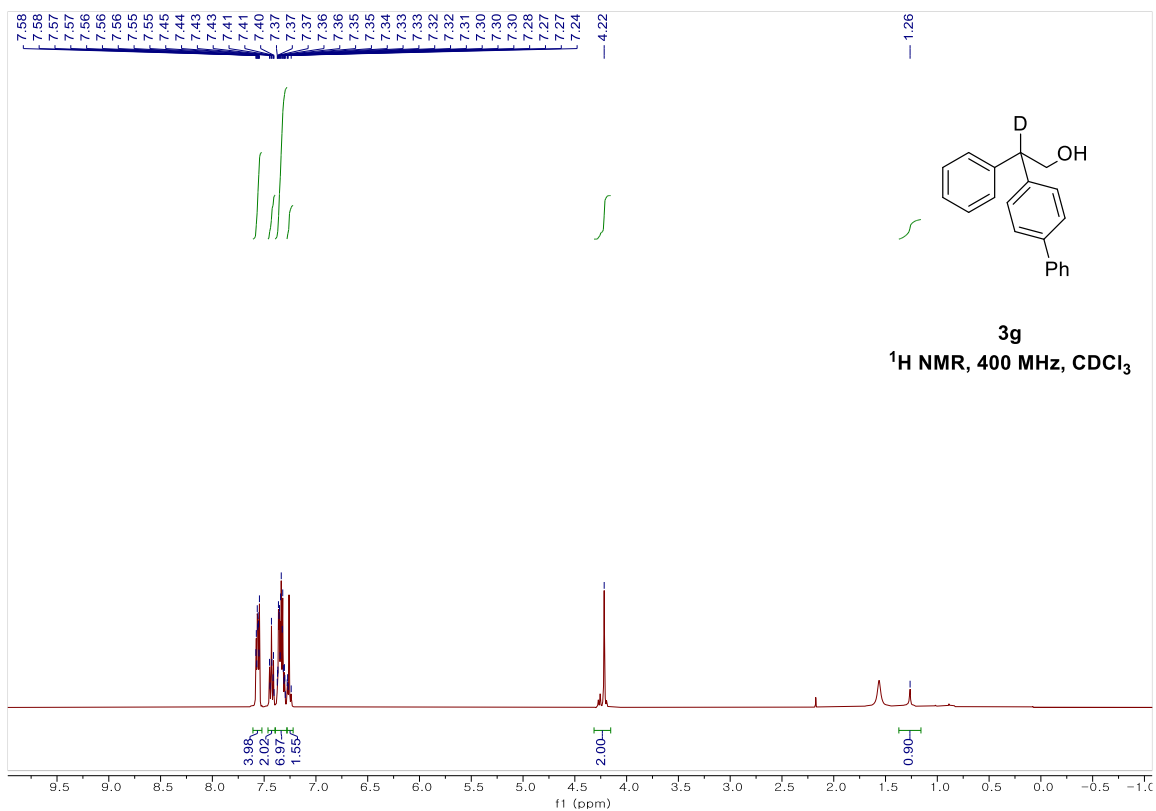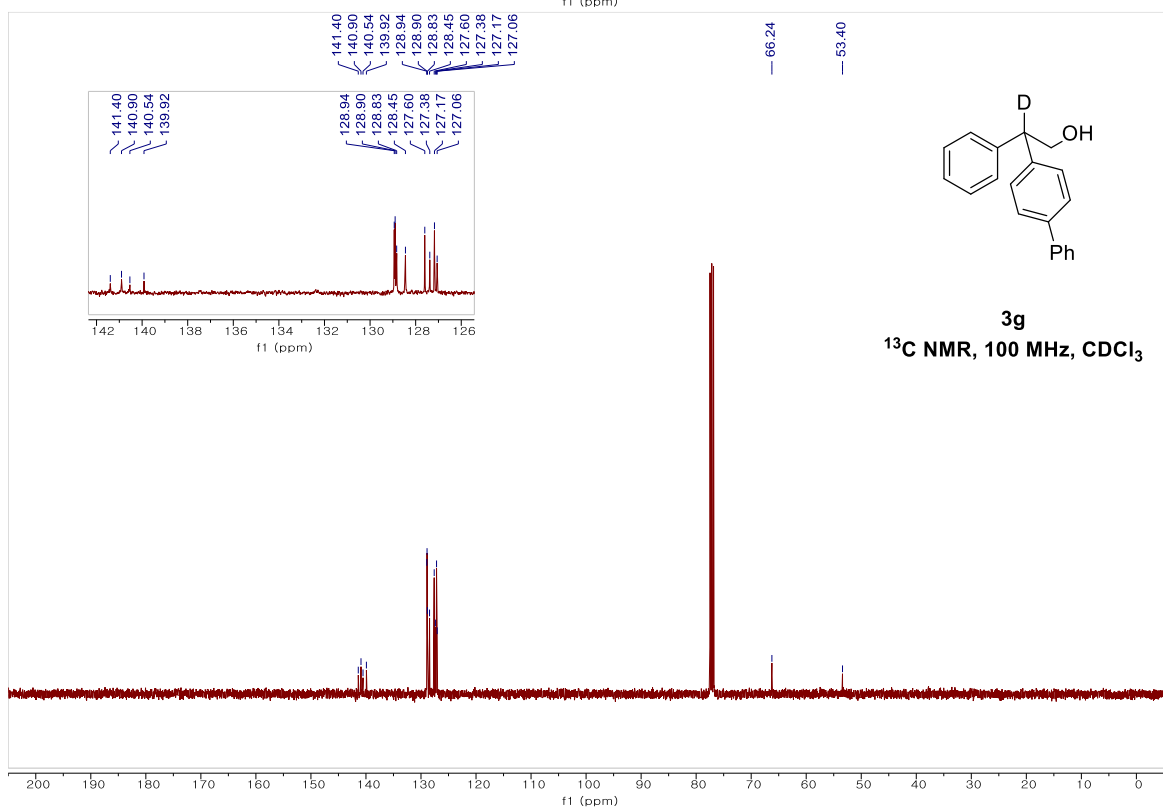

## 2-(2,6-dimethylphenyl)-2-phenylethan-2-d-1-ol (3h)

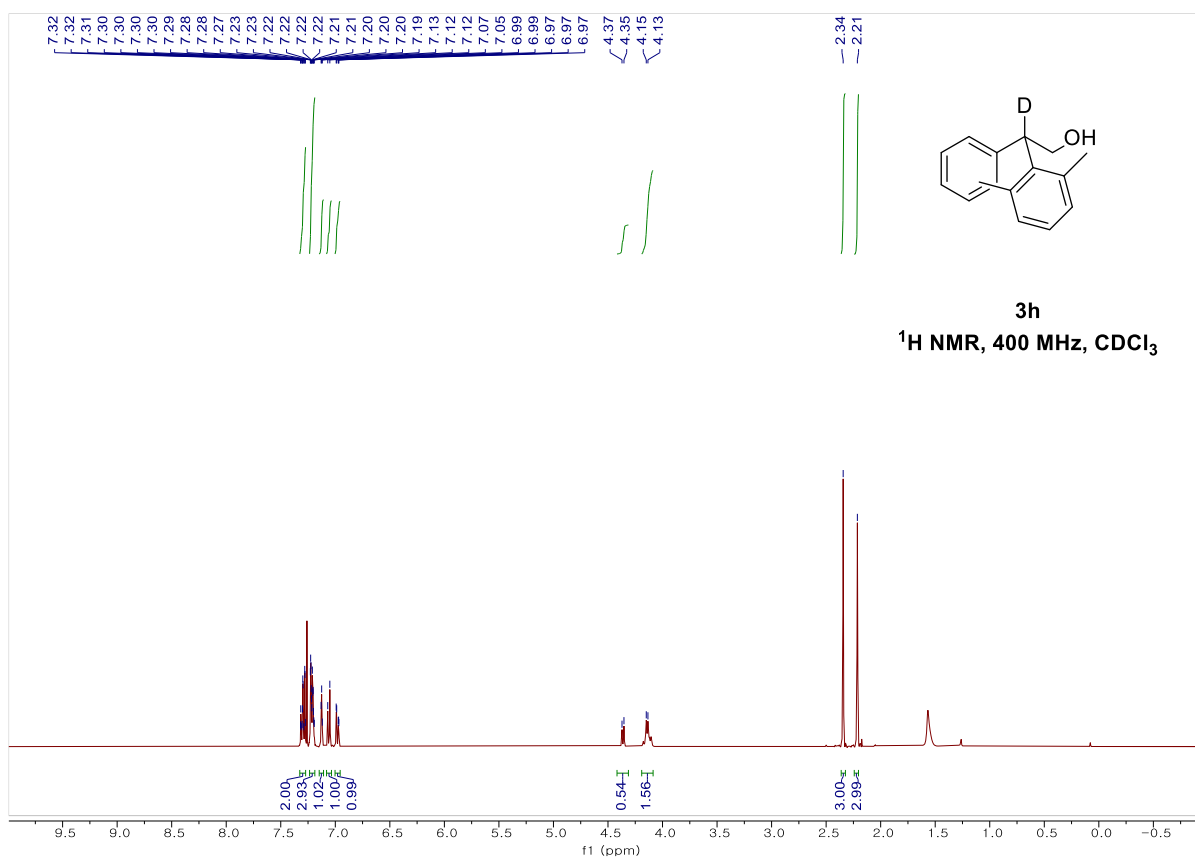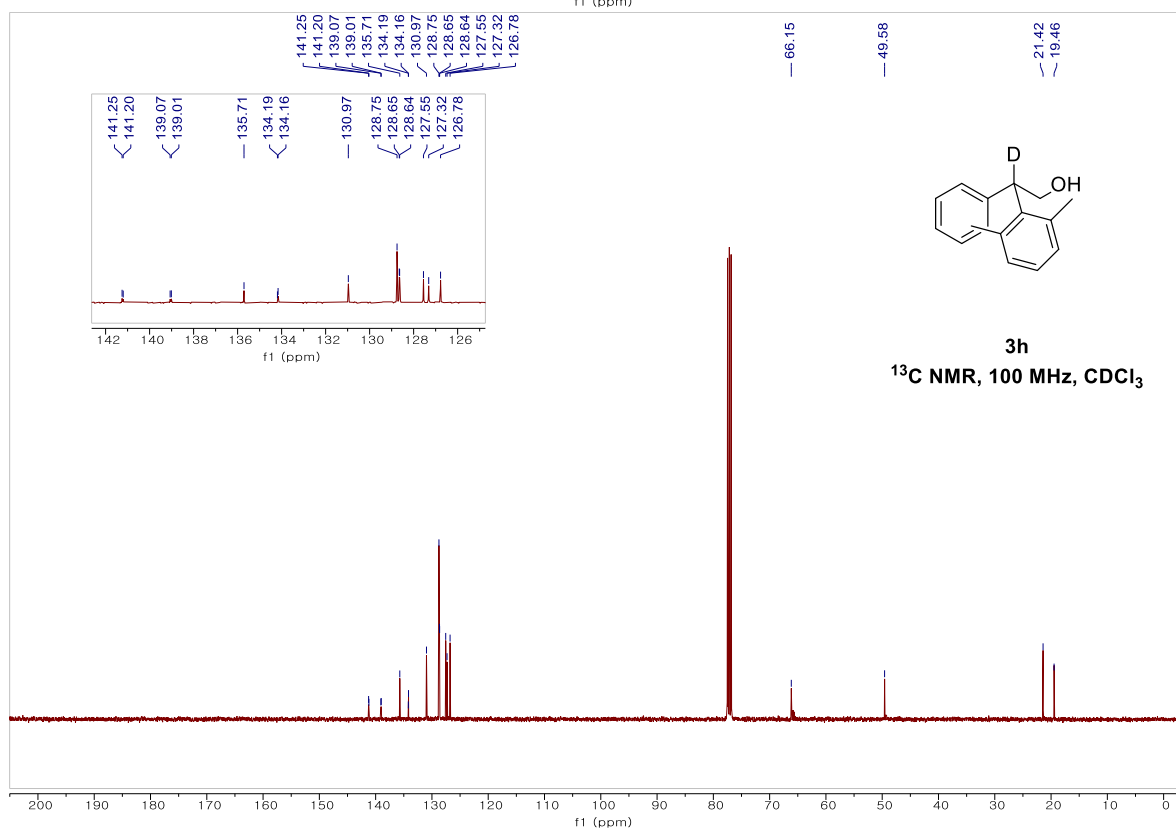

## 2-(naphthalen-2-yl)-2-phenylethan-2-d-1-ol (3i)

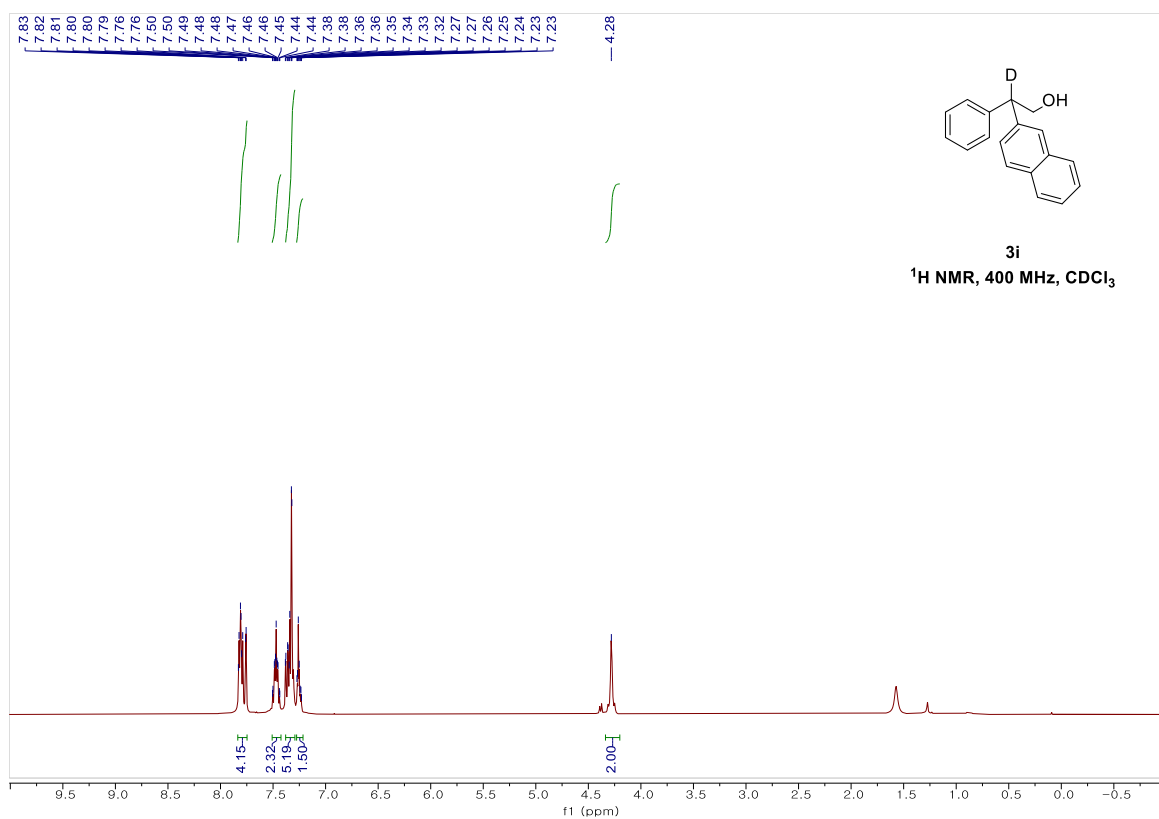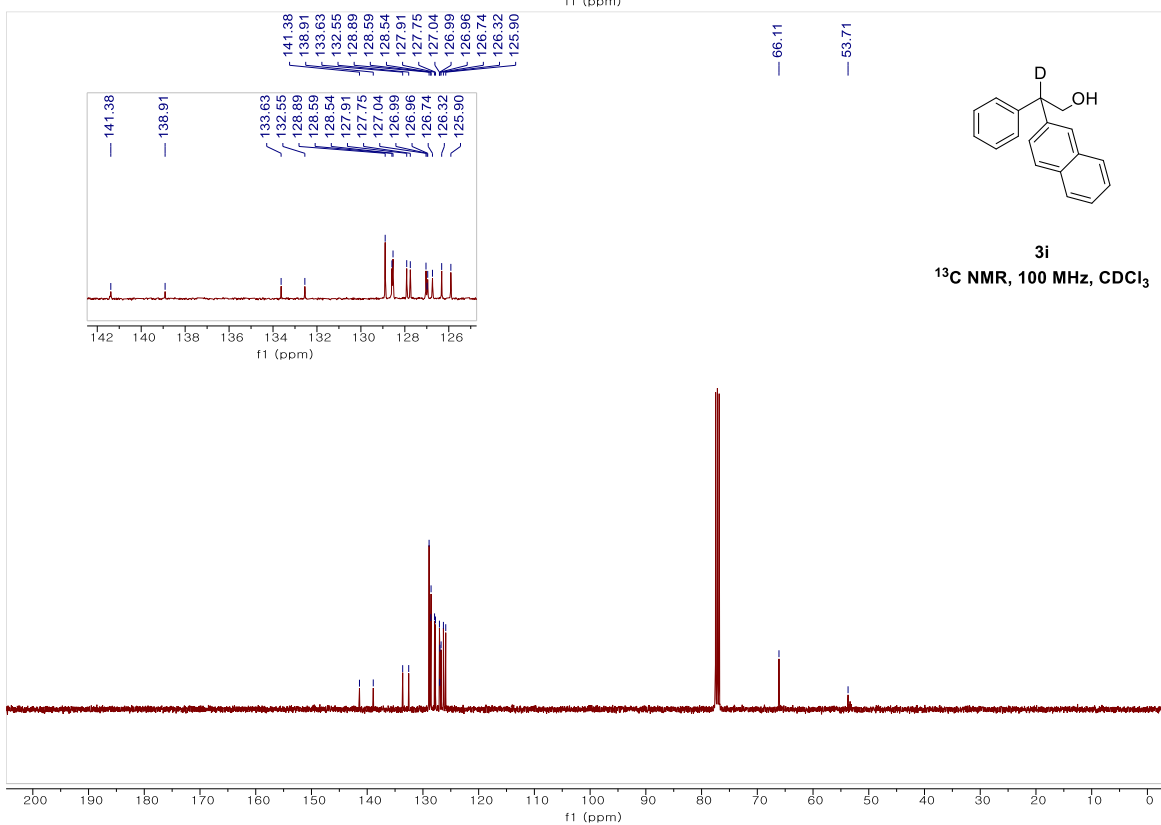

## 2-phenylpropan-2-d-1-ol (3k)

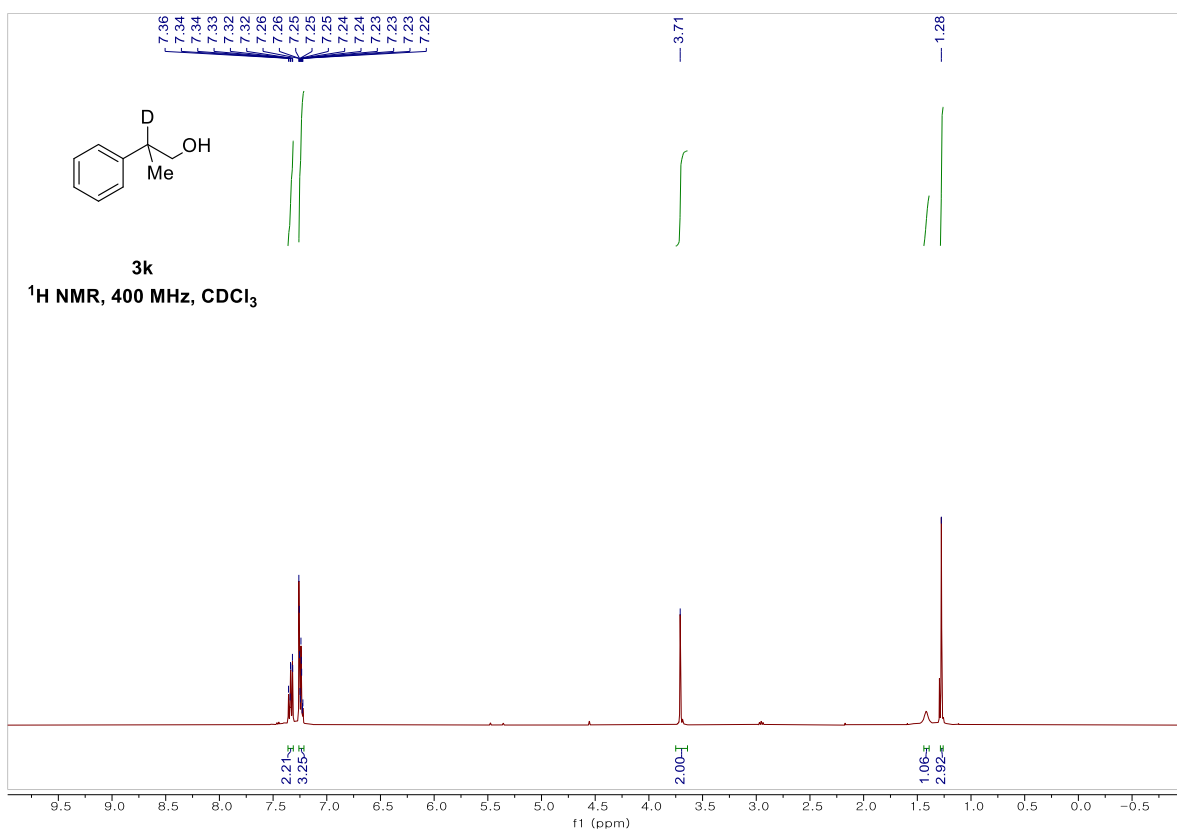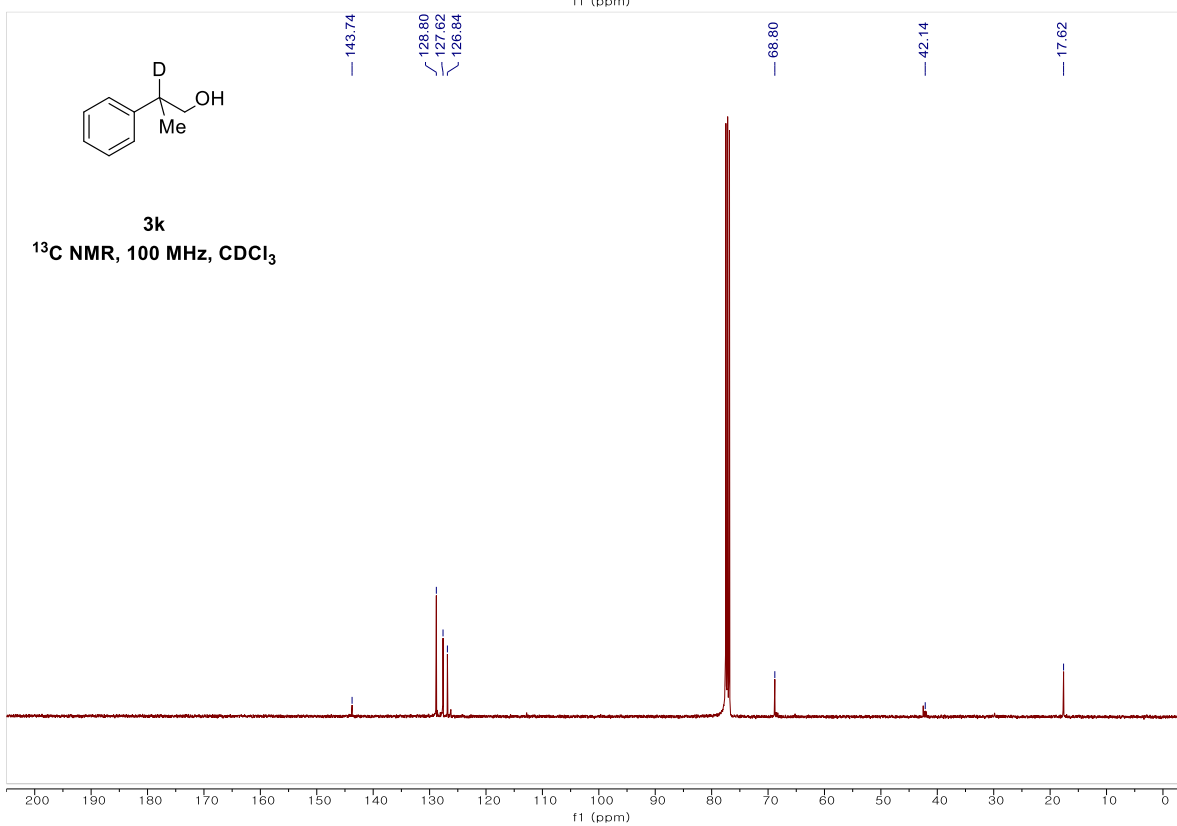

## 2-phenylbutan-2-d-1-ol (3m)

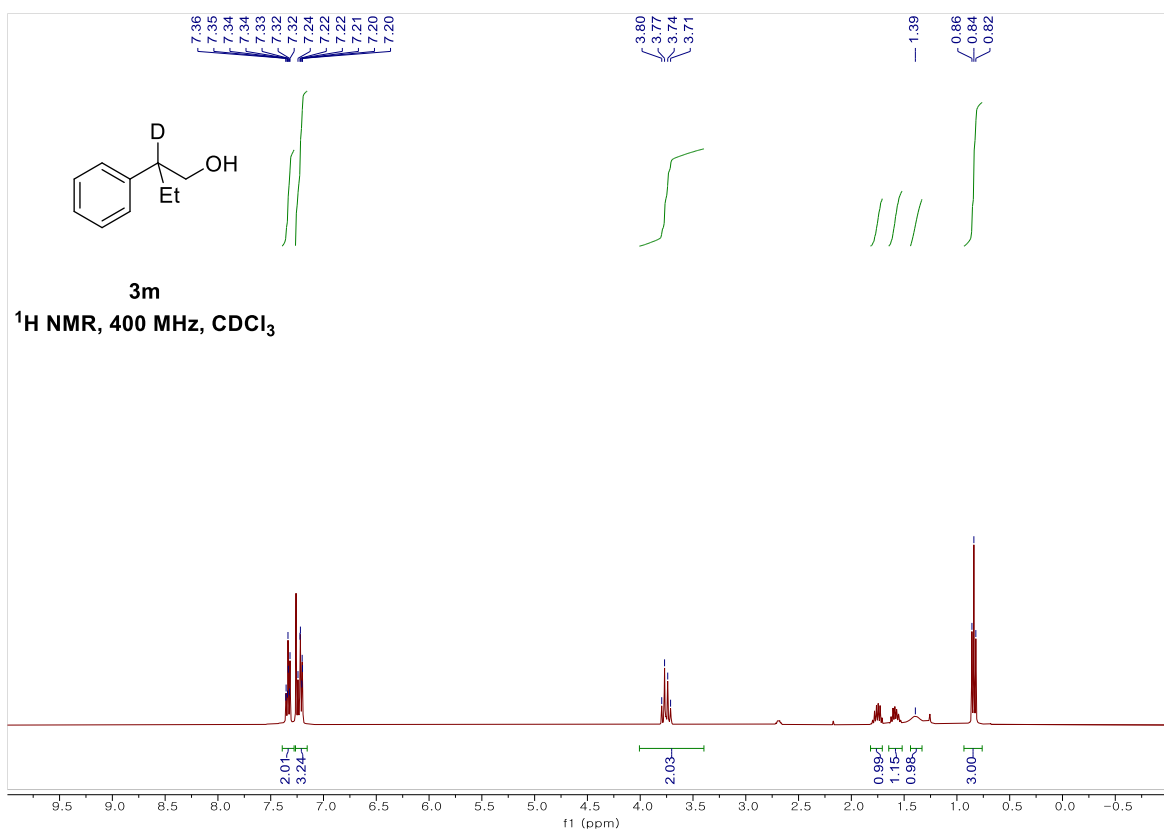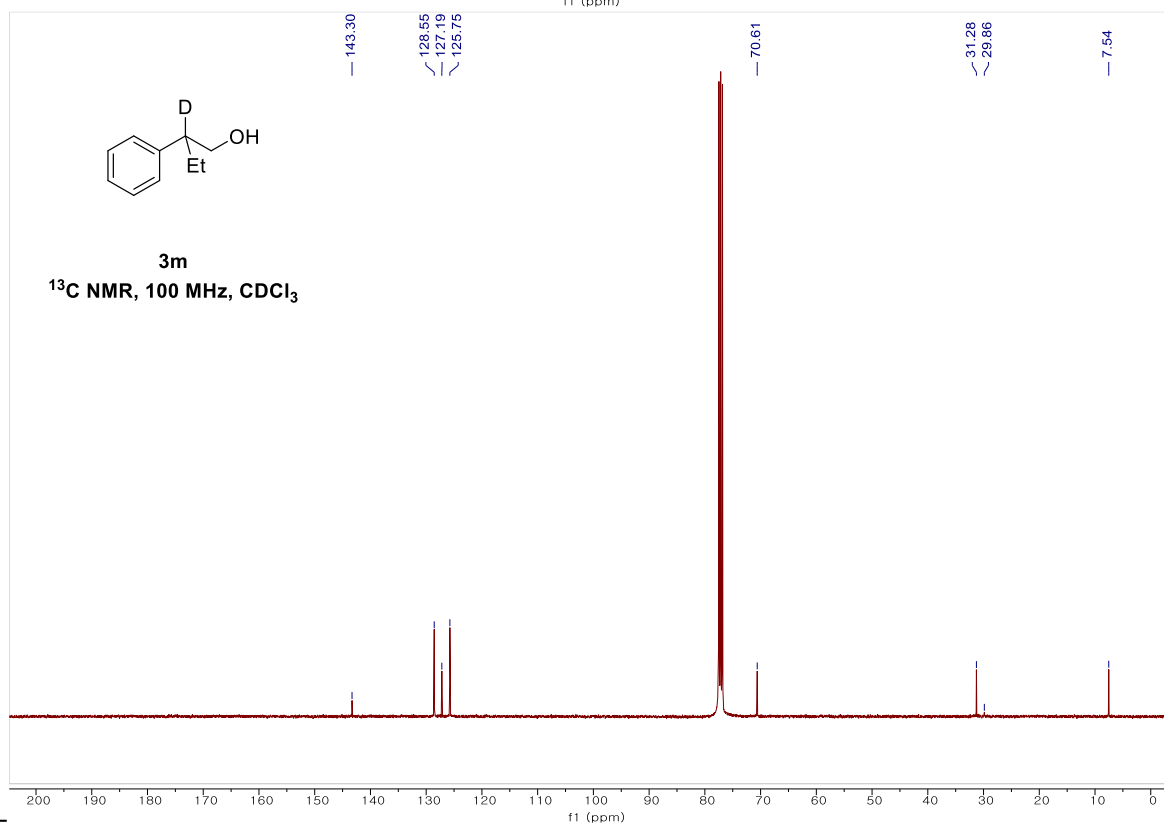

# 1-(4-methoxyphenyl)propan-1-d-2-ol (3z)

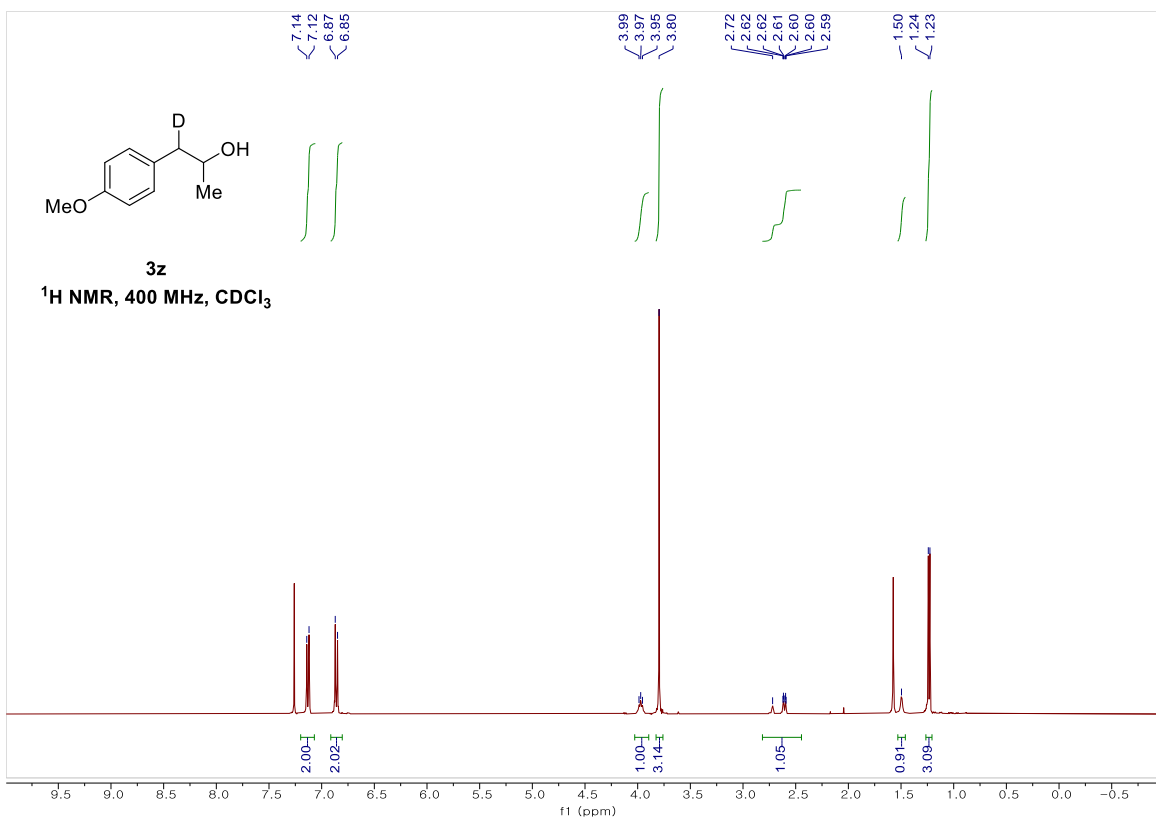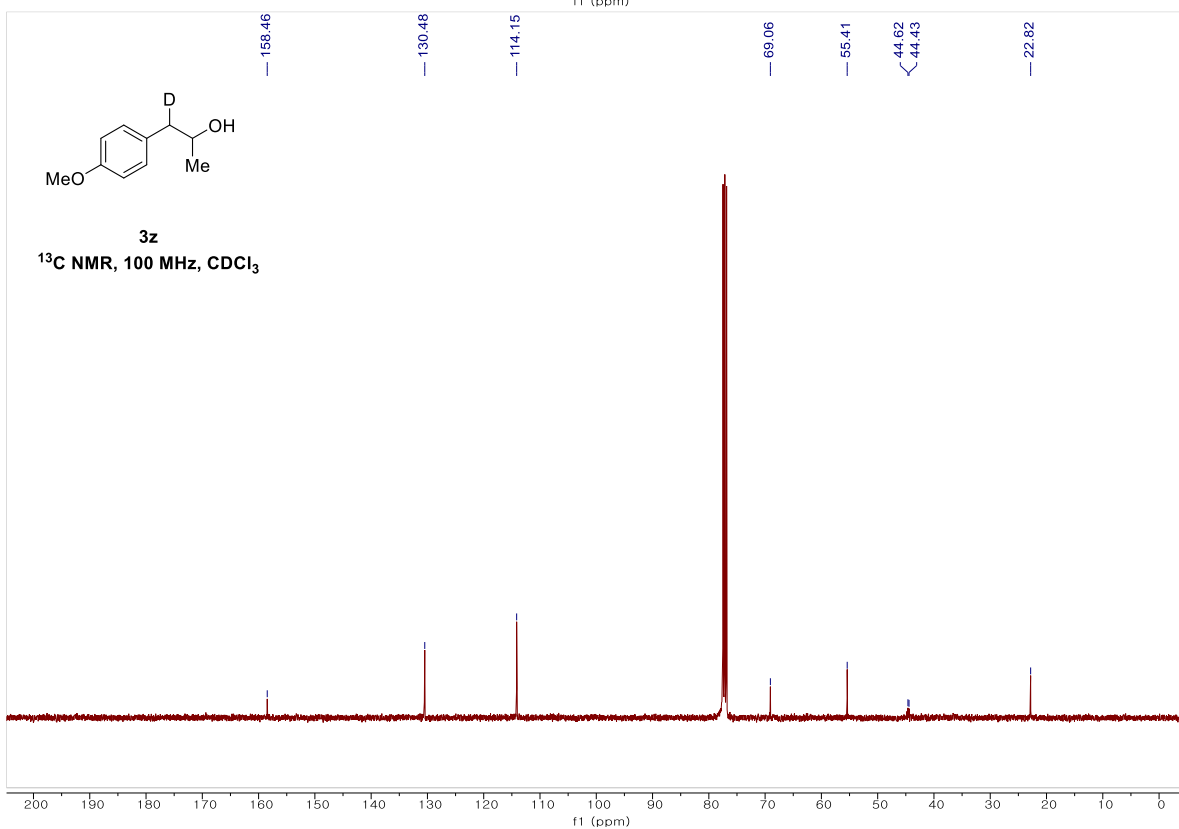

## 2-(4-methoxyphenyl)ethan-2-d-1-ol (3ad)

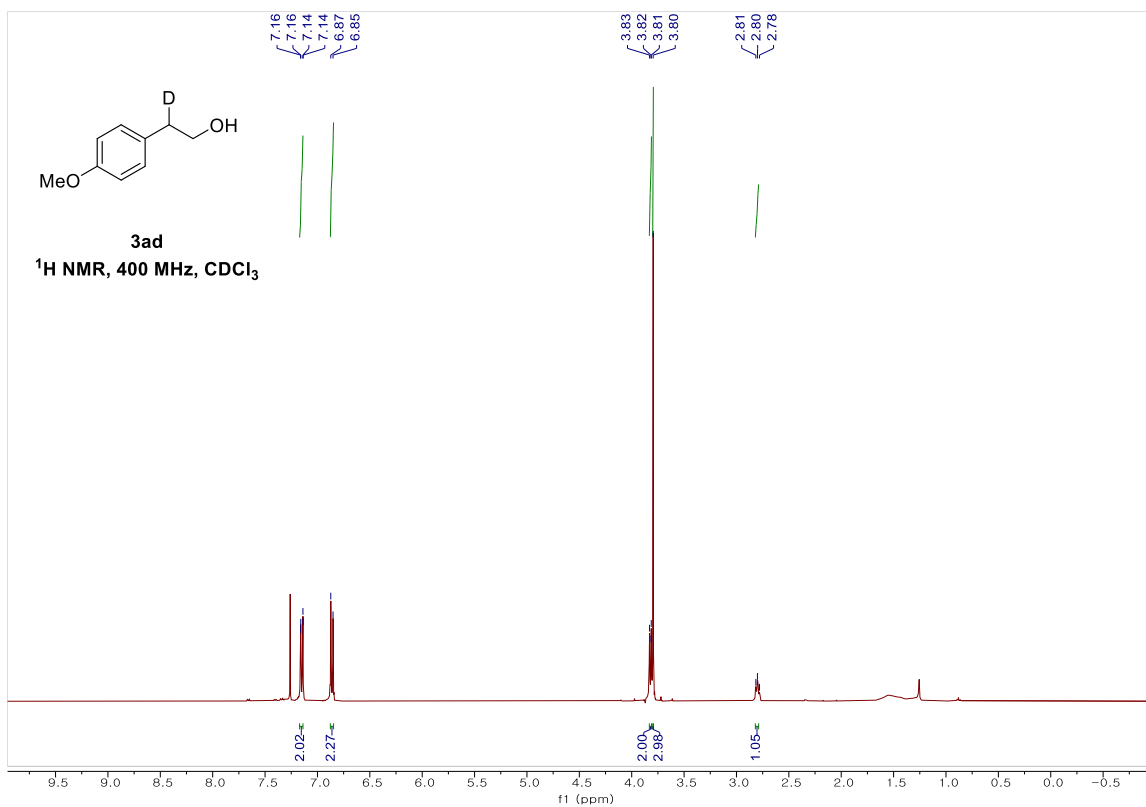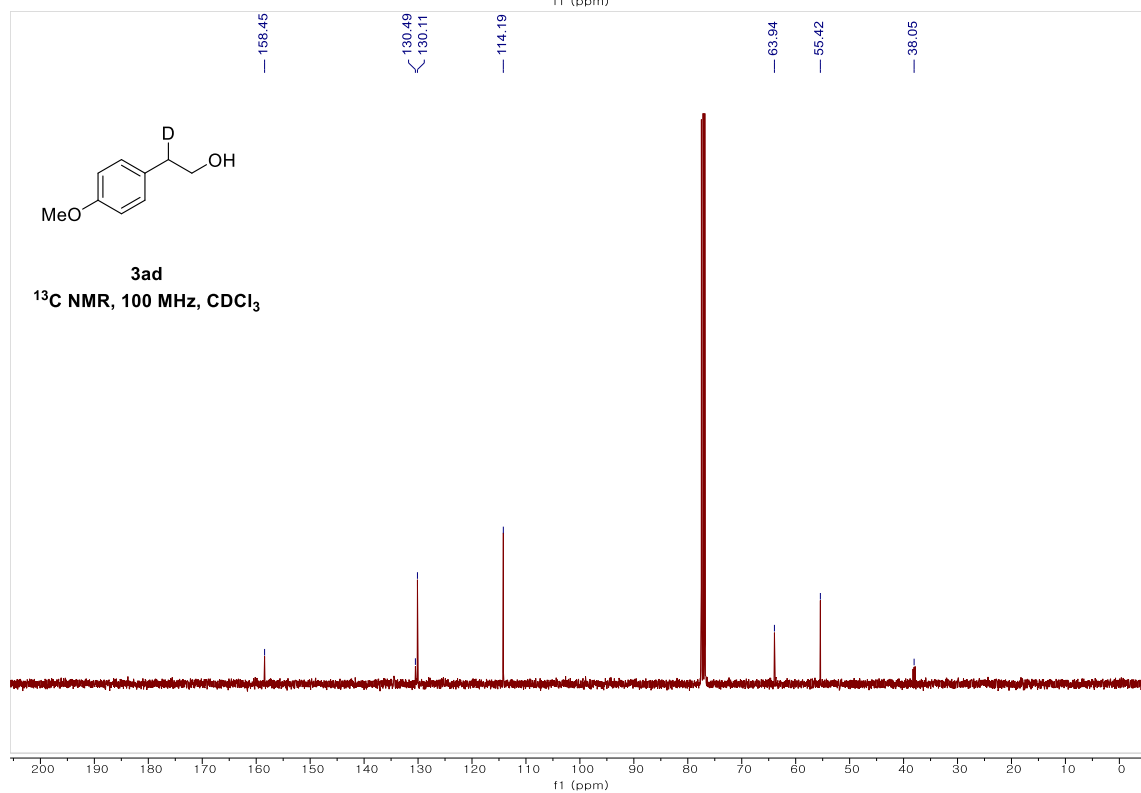

### 3,3-diphenylpropan-3-d-1-ol (3v)

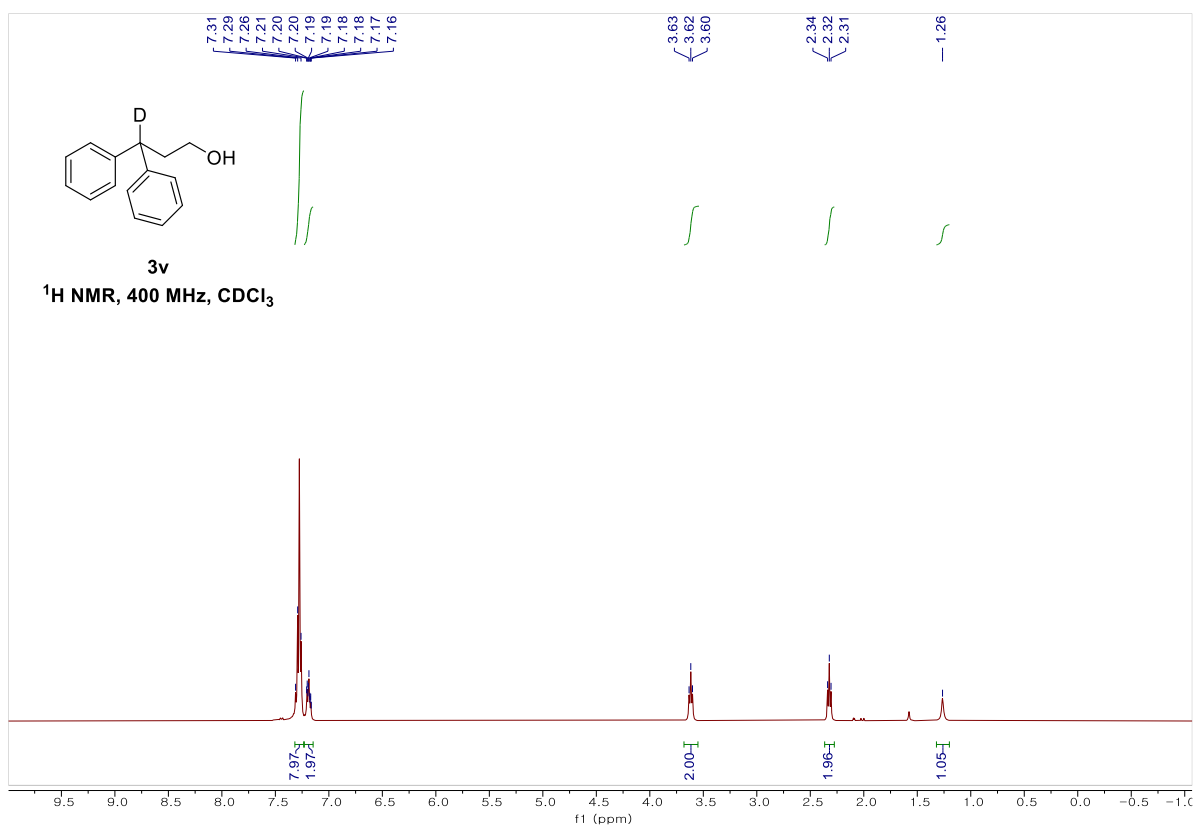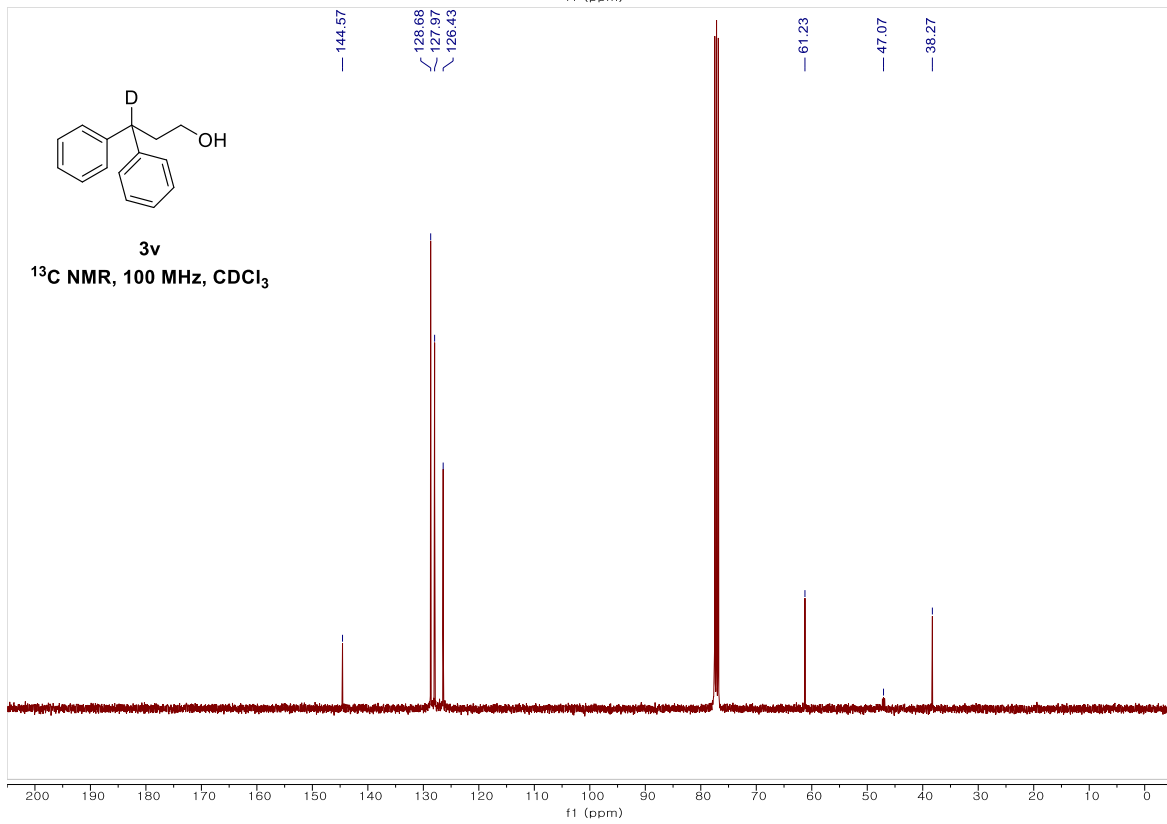

## 11. References

1. Dokai, Y., Saito, K., Yamada, T. Decarboxylative 1,2-rearrangement of cyclic carbonates promoted by lewis acid. *Chem. Commun.* **58**, 9500-9503 (2022).
2. Monguchi, Y., Wakayama, F., Takada, H., Sawama, Y., Sajiki, H. Osmium on chelate resin: Nonvolatile catalyst for the synthesis of diols from alkenes. *Synlett* **26**, 700-704 (2015).
3. Peterson, H., O'Neil, G. Tbat-catalyzed dioxasilinane formation from beta-hydroxy ketones. *Synthesis* **171**, 134418 (2025).
4. Manojveer, S., Salahi, S., Wendt, O. F., Johnson, M. T. Ru-catalyzed cross-dehydrogenative coupling between primary alcohols to guerbet alcohol derivatives: With relevance for fragrance synthesis. *J. Org. Chem.* **83**, 10864-10870 (2018).
5. Ayya Swamy P, C., Varenikov, A., de Ruiter, G. Direct asymmetric hydrogenation and dynamic kinetic resolution of aryl ketones catalyzed by an iridium-nhc exhibiting high enantio- and diastereoselectivity. *Chem. Eur. J.* **26**, 2333-2337 (2020).
6. da Silva Gomes, R., Reddy, K. M., Corey, E. J. Synthesis of chiral cyclic alcohols from chiral epoxides by h or n substitution with frontside displacement. *Org. Lett.* **20**, 6310-6313 (2018).
7. Fiolek, T. J., Keel, K. L., Tepe, J. J. Fluspirilene analogs activate the 20s proteasome and overcome proteasome impairment by intrinsically disordered protein oligomers. *ACS Chem. Neurosci.* **12**, 1438-1448 (2021).
8. Utsunomiya, M., Kondo, R., Oshima, T., Safumi, M., Suzuki, T., Obora, Y. Cross  $\beta$ -arylmethylation of alcohols catalysed by recyclable Ti-Pd alloys not requiring pre-activation. *Chem. Commun.* **57**, 5139-5142 (2021).
9. Hansch, C., Leo, A., Taft, R. A survey of hammett substituent constants and resonance and field parameters. *Chem. Rev.* **91**, 165-195 (1991).
10. Cao, Y.-X. et al. Photoinduced arylation of acridinium salts: Tunable photoredox catalysts for C-O bond cleavage. *J. Am. Chem. Soc.* **144**, 5902-5909 (2022).
11. Song, Y., Zou, Y., Chen, T., Zhang, Z., Zhang, W. Cobalt-catalyzed asymmetric hydrogenation of  $\alpha$ -hydroxy ketones enabled by a carboxylic acid additive promotion strategy. *Angew. Chem. Int. Ed.*, e202504159 (2025).
12. Subramanian, M. et al. General and selective homogeneous Ru-catalyzed transfer hydrogenation, deuteration, and methylation of functional compounds using methanol. *J. Catal.* **425**, 386-405 (2023).

13. Haubenreisser, S., Wöste, T. H., Martínez, C., Ishihara, K., Muñiz, K. Structurally defined molecular hypervalent iodine catalysts for intermolecular enantioselective reactions. *Angew. Chem. Int. Ed.* **55**, 413-417 (2016).
14. Soga, N., Yoshiki, T., Sato, A., Kawamoto, T., Ryu, I., Matsubara, H. Borane evolution and its application to organic synthesis using the phase-vanishing method. *Tetrahedron Lett.* **69**, 152977 (2021).
15. Zhang, Q., Darcel, C. Blue-light enhanced iron catalysed hydrosilylation of carboxamides and carboxylic esters at ambient conditions. *Eur. J. Org. Chem.* **27**, e202400475 (2024).
16. Lu, Z. et al. A visible-light-driven approach to free alcohol from esters of quinone propionic acid. *Synthesis* **55**, 473-480 (2023).
17. Matsuoka, K. et al. Chemoselective cleavage of Si–C (sp<sup>3</sup>) bonds in unactivated tetraalkylsilanes using iodine tris (trifluoroacetate). *J. Am. Chem. Soc.* **143**, 103-108 (2020).
18. Parr, R. G. Density functional theory of atoms and molecules. In: *Horizons of Quantum Chemistry: Proceedings of the Third International Congress of Quantum Chemistry Held at Kyoto, Japan, October 29-November 3, 1979*. Springer (1989).
19. Frisch, M. et al. Uranyl extraction by n, n-dialkylamide ligands studied by static and dynamic dft simulations. *Gaussian* **9**, 227 (2009).
20. Lee, C., Yang, W., Parr, R. G. Development of the colle-salvetti correlation-energy formula into a functional of the electron density. *Phys. Rev. B* **37**, 785-789 (1988).
21. Ditchfield, R., Hehre, W. J., Pople, J. A. Self-consistent molecular-orbital methods. Ix. An extended gaussian-type basis for molecular-orbital studies of organic molecules. *J. Chem. Phys.* **54**, 724-728 (1971).
22. Marenich, A. V., Cramer, C. J., Truhlar, D. G. Universal solvation model based on solute electron density and on a continuum model of the solvent defined by the bulk dielectric constant and atomic surface tensions. *J. Phys. Chem. B* **113**, 6378-6396 (2009).
